# Supplementary material for: Clinicopathological characteristics, treatment and survival of pulmonary large cell neuroendocrine carcinoma: a SEER population-based study
Source: PeerJ. 2019 Mar 27;7:e6539. doi: 10.7717/peerj.6539 (PMC6441320; doi:10.7717/peerj.6539)
Supplement: Supplemental Information 1 — The raw measurements are provided in Supplementary File 1. [file peerj-07-6539-s001.xlsx]

## Sheet: 原下载稿
number	Age at diagnosis	Year of birth	Year of diagnosis	Sex	Race recode (White, Black, Other)	Primary Site - labeled	ICD-O-3 Hist/behav	Grade	AYA site recode/WHO 2008	Lymphoma subtype recode/WHO 2008	ICCC site recode ICD-O-3/WHO 2008	Laterality	Diagnostic Confirmation	Derived AJCC Stage Group, 7th ed (2010+)	Derived AJCC Stage Group, 6th ed (2004+)	AJCC stage 3rd edition (1988-2003)	SEER modified AJCC stage 3rd (1988-2003)	Derived AJCC T, 7th ed (2010+)	Derived AJCC N, 7th ed (2010+)	Derived AJCC M, 7th ed (2010+)	Derived AJCC T, 6th ed (2004+)	Derived AJCC N, 6th ed (2004+)	Derived AJCC M, 6th ed (2004+)	T value - based on AJCC 3rd (1988-2003)	N value - based on AJCC 3rd (1988-2003)	M value - based on AJCC 3rd (1988-2003)	Derived SS1977 (2004+)	Derived SS2000 (2004+)	Summary stage 2000 (1998+)	SEER summary stage 2000 (2001-2003)	SEER summary stage 1977 (1995-2000)	RX Summ--Surg Prim Site (1998+)	RX Summ--Scope Reg LN Sur (2003+)	RX Summ--Surg Oth Reg/Dis (2003+)	Radiation sequence with surgery	Reason no cancer-directed surgery	Radiation	Scope of reg lymph nd surg (1998-2002)	RX Summ--Reg LN Examined (1998-2002)	Surgery of oth reg/dis sites (1998-2002)	Site specific surgery (1973-1997 varying detail by year and site)	Radiation to Brain or CNS (1988-1997)	CS tumor size (2004+)	CS extension (2004+)	CS lymph nodes (2004+)	CS mets at dx (2004+)	CS site-specific factor 1 (2004+ varying by schema)	CS site-specific factor 2 (2004+ varying by schema)	CS site-specific factor 3 (2004+ varying by schema)
1	69	1938	2007	Female	Other (American Indian/AK Native, Asian/Pacific Islander)	C34.1-Upper lobe, lung	8013/3: Large cell neuroendocrine carcinoma	Unknown	8.3 Carcinoma of trachea,bronchus, and lung	Unclassified	XI(f) Other and unspecified carcinomas	Left - origin of primary	Positive histology	Blank(s)	IB	Blank(s)	Blank(s)	Blank(s)	Blank(s)	Blank(s)	T2	N0	M0	Blank(s)	Blank(s)	Blank(s)	L	L	Localized	Blank(s)	Blank(s)	33	4 or more regional lymph nodes removed	None; diagnosed at autopsy	No radiation and/or cancer-directed surgery	Surgery performed	None	Blank(s)	Blank(s)	Blank(s)	Blank(s)	Blank(s)	65	100	0	0	988	Blank(s)	Blank(s)
2	82	1929	2011	Male	White	C34.1-Upper lobe, lung	8013/3: Large cell neuroendocrine carcinoma	Unknown	8.3 Carcinoma of trachea,bronchus, and lung	Unclassified	XI(f) Other and unspecified carcinomas	Left - origin of primary	Positive histology	IV	IV	Blank(s)	Blank(s)	T3	N0	M1b	T4	N0	M1	Blank(s)	Blank(s)	Blank(s)	D	D	Distant	Blank(s)	Blank(s)	0	None	None; diagnosed at autopsy	No radiation and/or cancer-directed surgery	Not recommended	None	Blank(s)	Blank(s)	Blank(s)	Blank(s)	Blank(s)	12	999	0	40	40	998	Blank(s)
3	64	1949	2013	Female	White	C34.9-Lung, NOS	8013/3: Large cell neuroendocrine carcinoma	Unknown	8.3 Carcinoma of trachea,bronchus, and lung	Unclassified	XI(f) Other and unspecified carcinomas	Paired site, but no information concerning laterality	Positive histology	IV	IV	Blank(s)	Blank(s)	TX	NX	M1b	TX	NX	M1	Blank(s)	Blank(s)	Blank(s)	D	D	Distant	Blank(s)	Blank(s)	0	None	None; diagnosed at autopsy	No radiation and/or cancer-directed surgery	Not recommended	None	Blank(s)	Blank(s)	Blank(s)	Blank(s)	Blank(s)	32	999	999	40	999	998	Blank(s)
4	84	1919	2003	Male	White	C34.1-Upper lobe, lung	8013/3: Large cell neuroendocrine carcinoma	Unknown	8.3 Carcinoma of trachea,bronchus, and lung	Unclassified	XI(f) Other and unspecified carcinomas	Right - origin of primary	Positive histology	Blank(s)	Blank(s)	90	20	Blank(s)	Blank(s)	Blank(s)	Blank(s)	Blank(s)	Blank(s)	TXa	N1	M0	Blank(s)	Blank(s)	Regional	Regional lymph nodes involved only	Blank(s)	46	4 or more regional lymph nodes removed	Non-primary surgical procedure to other regional sites	No radiation and/or cancer-directed surgery	Surgery performed	None	Blank(s)	Blank(s)	Blank(s)	Blank(s)	Blank(s)	Blank(s)	Blank(s)	Blank(s)	Blank(s)	Blank(s)	Blank(s)	Blank(s)
5	86	1916	2003	Male	White	C34.9-Lung, NOS	8013/3: Large cell neuroendocrine carcinoma	Unknown	8.3 Carcinoma of trachea,bronchus, and lung	Unclassified	XI(f) Other and unspecified carcinomas	Paired site, but no information concerning laterality	Positive exfoliative cytology, no positive histology	Blank(s)	Blank(s)	40	40	Blank(s)	Blank(s)	Blank(s)	Blank(s)	Blank(s)	Blank(s)	T4	NX	M1	Blank(s)	Blank(s)	Distant	Distant site(s)/node(s) involved	Blank(s)	0	None	None; diagnosed at autopsy	No radiation and/or cancer-directed surgery	Not recommended	Beam radiation	Blank(s)	Blank(s)	Blank(s)	Blank(s)	Blank(s)	Blank(s)	Blank(s)	Blank(s)	Blank(s)	Blank(s)	Blank(s)	Blank(s)
6	75	1932	2008	Female	Black	C34.1-Upper lobe, lung	8013/3: Large cell neuroendocrine carcinoma	Unknown	8.3 Carcinoma of trachea,bronchus, and lung	Unclassified	XI(f) Other and unspecified carcinomas	Left - origin of primary	Positive histology	Blank(s)	IV	Blank(s)	Blank(s)	Blank(s)	Blank(s)	Blank(s)	T2	N0	M1	Blank(s)	Blank(s)	Blank(s)	D	D	Distant	Blank(s)	Blank(s)	0	None	None; diagnosed at autopsy	No radiation and/or cancer-directed surgery	Not recommended	None	Blank(s)	Blank(s)	Blank(s)	Blank(s)	Blank(s)	71	300	0	50	988	Blank(s)	Blank(s)
7	76	1931	2007	Male	White	C34.9-Lung, NOS	8013/3: Large cell neuroendocrine carcinoma	Poorly differentiated; Grade III	8.3 Carcinoma of trachea,bronchus, and lung	Unclassified	XI(f) Other and unspecified carcinomas	Right - origin of primary	Positive exfoliative cytology, no positive histology	Blank(s)	IV	Blank(s)	Blank(s)	Blank(s)	Blank(s)	Blank(s)	T4	N0	M1	Blank(s)	Blank(s)	Blank(s)	D	D	Distant	Blank(s)	Blank(s)	0	None	None; diagnosed at autopsy	No radiation and/or cancer-directed surgery	Not recommended	Beam radiation	Blank(s)	Blank(s)	Blank(s)	Blank(s)	Blank(s)	25	750	0	40	988	Blank(s)	Blank(s)
8	60	1947	2007	Male	White	C34.1-Upper lobe, lung	8013/3: Large cell neuroendocrine carcinoma	Poorly differentiated; Grade III	8.3 Carcinoma of trachea,bronchus, and lung	Unclassified	XI(f) Other and unspecified carcinomas	Right - origin of primary	Positive histology	Blank(s)	IIIB	Blank(s)	Blank(s)	Blank(s)	Blank(s)	Blank(s)	T4	N2	M0	Blank(s)	Blank(s)	Blank(s)	RE+RN	RE+RN	Regional	Blank(s)	Blank(s)	0	None	None; diagnosed at autopsy	No radiation and/or cancer-directed surgery	Not recommended	None	Blank(s)	Blank(s)	Blank(s)	Blank(s)	Blank(s)	79	700	200	0	988	Blank(s)	Blank(s)
9	74	1931	2005	Female	White	C34.1-Upper lobe, lung	8013/3: Large cell neuroendocrine carcinoma	Poorly differentiated; Grade III	8.3 Carcinoma of trachea,bronchus, and lung	Unclassified	XI(f) Other and unspecified carcinomas	Left - origin of primary	Positive histology	Blank(s)	IIB	Blank(s)	Blank(s)	Blank(s)	Blank(s)	Blank(s)	T3	N0	M0	Blank(s)	Blank(s)	Blank(s)	D	RE	Regional	Blank(s)	Blank(s)	33	4 or more regional lymph nodes removed	None; diagnosed at autopsy	No radiation and/or cancer-directed surgery	Surgery performed	None	Blank(s)	Blank(s)	Blank(s)	Blank(s)	Blank(s)	35	600	0	0	988	Blank(s)	Blank(s)
10	58	1950	2009	Female	Black	C34.1-Upper lobe, lung	8013/3: Large cell neuroendocrine carcinoma	Unknown	8.3 Carcinoma of trachea,bronchus, and lung	Unclassified	XI(f) Other and unspecified carcinomas	Left - origin of primary	Positive histology	Blank(s)	IV	Blank(s)	Blank(s)	Blank(s)	Blank(s)	Blank(s)	T2	N3	M1	Blank(s)	Blank(s)	Blank(s)	D	D	Distant	Blank(s)	Blank(s)	0	Biopsy or aspiration of regional lymph node, NOS	None; diagnosed at autopsy	Radiation after surgery	Not recommended	Beam radiation	Blank(s)	Blank(s)	Blank(s)	Blank(s)	Blank(s)	90	100	600	40	988	Blank(s)	Blank(s)
11	59	1942	2002	Female	White	C34.8-Overlapping lesion of lung	8013/3: Large cell neuroendocrine carcinoma	Unknown	8.3 Carcinoma of trachea,bronchus, and lung	Unclassified	XI(f) Other and unspecified carcinomas	Right - origin of primary	Positive histology	Blank(s)	Blank(s)	40	40	Blank(s)	Blank(s)	Blank(s)	Blank(s)	Blank(s)	Blank(s)	TX	N2	M1	Blank(s)	Blank(s)	Distant	Distant site(s)/node(s) involved	Blank(s)	0	Blank(s)	Blank(s)	No radiation and/or cancer-directed surgery	Not recommended	Beam radiation	0	0	0	Blank(s)	Blank(s)	Blank(s)	Blank(s)	Blank(s)	Blank(s)	Blank(s)	Blank(s)	Blank(s)
12	85	1916	2002	Male	White	C34.1-Upper lobe, lung	8013/3: Large cell neuroendocrine carcinoma	Unknown	8.3 Carcinoma of trachea,bronchus, and lung	Unclassified	XI(f) Other and unspecified carcinomas	Right - origin of primary	Positive histology	Blank(s)	Blank(s)	40	40	Blank(s)	Blank(s)	Blank(s)	Blank(s)	Blank(s)	Blank(s)	TX	N2	M1	Blank(s)	Blank(s)	Distant	Distant site(s)/node(s) involved	Blank(s)	0	Blank(s)	Blank(s)	No radiation and/or cancer-directed surgery	Not recommended	Beam radiation	0	0	0	Blank(s)	Blank(s)	Blank(s)	Blank(s)	Blank(s)	Blank(s)	Blank(s)	Blank(s)	Blank(s)
13	66	1934	2001	Male	White	C34.3-Lower lobe, lung	8013/3: Large cell neuroendocrine carcinoma	Poorly differentiated; Grade III	8.3 Carcinoma of trachea,bronchus, and lung	Unclassified	XI(f) Other and unspecified carcinomas	Left - origin of primary	Positive histology	Blank(s)	Blank(s)	10	10	Blank(s)	Blank(s)	Blank(s)	Blank(s)	Blank(s)	Blank(s)	T2	N0	M0	Blank(s)	Blank(s)	Localized	Localized only	Blank(s)	30	Blank(s)	Blank(s)	No radiation and/or cancer-directed surgery	Surgery performed	None	2	4	0	Blank(s)	Blank(s)	Blank(s)	Blank(s)	Blank(s)	Blank(s)	Blank(s)	Blank(s)	Blank(s)
14	82	1919	2002	Female	White	C34.1-Upper lobe, lung	8013/3: Large cell neuroendocrine carcinoma	Undifferentiated; anaplastic; Grade IV	8.3 Carcinoma of trachea,bronchus, and lung	Unclassified	XI(f) Other and unspecified carcinomas	Right - origin of primary	Positive histology	Blank(s)	Blank(s)	90	10	Blank(s)	Blank(s)	Blank(s)	Blank(s)	Blank(s)	Blank(s)	T2	NX	M0	Blank(s)	Blank(s)	Regional	Regional by direct extension only	Blank(s)	21	Blank(s)	Blank(s)	No radiation and/or cancer-directed surgery	Surgery performed	None	0	0	0	Blank(s)	Blank(s)	Blank(s)	Blank(s)	Blank(s)	Blank(s)	Blank(s)	Blank(s)	Blank(s)
15	38	1963	2002	Female	White	C34.1-Upper lobe, lung	8013/3: Large cell neuroendocrine carcinoma	Unknown	8.3 Carcinoma of trachea,bronchus, and lung	Unclassified	XI(f) Other and unspecified carcinomas	Right - origin of primary	Positive histology	Blank(s)	Blank(s)	40	40	Blank(s)	Blank(s)	Blank(s)	Blank(s)	Blank(s)	Blank(s)	TX	N3	M1	Blank(s)	Blank(s)	Distant	Distant site(s)/node(s) involved	Blank(s)	0	Blank(s)	Blank(s)	No radiation and/or cancer-directed surgery	Not recommended	None	0	0	0	Blank(s)	Blank(s)	Blank(s)	Blank(s)	Blank(s)	Blank(s)	Blank(s)	Blank(s)	Blank(s)
16	41	1962	2003	Male	White	C34.1-Upper lobe, lung	8013/3: Large cell neuroendocrine carcinoma	Unknown	8.3 Carcinoma of trachea,bronchus, and lung	Unclassified	XI(f) Other and unspecified carcinomas	Left - origin of primary	Positive histology	Blank(s)	Blank(s)	40	40	Blank(s)	Blank(s)	Blank(s)	Blank(s)	Blank(s)	Blank(s)	TX	NX	M1	Blank(s)	Blank(s)	Distant	Distant site(s)/node(s) involved	Blank(s)	21	None	None; diagnosed at autopsy	Radiation after surgery	Surgery performed	Beam radiation	Blank(s)	Blank(s)	Blank(s)	Blank(s)	Blank(s)	Blank(s)	Blank(s)	Blank(s)	Blank(s)	Blank(s)	Blank(s)	Blank(s)
17	57	1945	2003	Male	White	C34.0-Main bronchus	8013/3: Large cell neuroendocrine carcinoma	Undifferentiated; anaplastic; Grade IV	8.3 Carcinoma of trachea,bronchus, and lung	Unclassified	XI(f) Other and unspecified carcinomas	Right - origin of primary	Positive histology	Blank(s)	Blank(s)	40	40	Blank(s)	Blank(s)	Blank(s)	Blank(s)	Blank(s)	Blank(s)	TX	NX	M1	Blank(s)	Blank(s)	Distant	Distant site(s)/node(s) involved	Blank(s)	0	None	None; diagnosed at autopsy	No radiation and/or cancer-directed surgery	Not recommended	Beam radiation	Blank(s)	Blank(s)	Blank(s)	Blank(s)	Blank(s)	Blank(s)	Blank(s)	Blank(s)	Blank(s)	Blank(s)	Blank(s)	Blank(s)
18	77	1927	2005	Female	White	C34.9-Lung, NOS	8013/3: Large cell neuroendocrine carcinoma	Unknown	8.3 Carcinoma of trachea,bronchus, and lung	Unclassified	XI(f) Other and unspecified carcinomas	Right - origin of primary	Positive histology	Blank(s)	IV	Blank(s)	Blank(s)	Blank(s)	Blank(s)	Blank(s)	T0	N1	M1	Blank(s)	Blank(s)	Blank(s)	D	D	Distant	Blank(s)	Blank(s)	0	None	None; diagnosed at autopsy	No radiation and/or cancer-directed surgery	Not recommended	None	Blank(s)	Blank(s)	Blank(s)	Blank(s)	Blank(s)	0	950	100	40	988	Blank(s)	Blank(s)
19	77	1925	2002	Male	Black	C34.3-Lower lobe, lung	8013/3: Large cell neuroendocrine carcinoma	Unknown	8.3 Carcinoma of trachea,bronchus, and lung	Unclassified	XI(f) Other and unspecified carcinomas	Left - origin of primary	Positive histology	Blank(s)	Blank(s)	90	31	Blank(s)	Blank(s)	Blank(s)	Blank(s)	Blank(s)	Blank(s)	T3	NX	M0	Blank(s)	Blank(s)	Regional	Regional by direct extension only	Blank(s)	0	Blank(s)	Blank(s)	No radiation and/or cancer-directed surgery	Not recommended	None	0	0	0	Blank(s)	Blank(s)	Blank(s)	Blank(s)	Blank(s)	Blank(s)	Blank(s)	Blank(s)	Blank(s)
20	79	1924	2003	Male	White	C34.1-Upper lobe, lung	8013/3: Large cell neuroendocrine carcinoma	Unknown	8.3 Carcinoma of trachea,bronchus, and lung	Unclassified	XI(f) Other and unspecified carcinomas	Left - origin of primary	Positive exfoliative cytology, no positive histology	Blank(s)	Blank(s)	40	40	Blank(s)	Blank(s)	Blank(s)	Blank(s)	Blank(s)	Blank(s)	TX	NX	M1	Blank(s)	Blank(s)	Distant	Distant site(s)/node(s) involved	Blank(s)	0	None	None; diagnosed at autopsy	No radiation and/or cancer-directed surgery	Not recommended	None	Blank(s)	Blank(s)	Blank(s)	Blank(s)	Blank(s)	Blank(s)	Blank(s)	Blank(s)	Blank(s)	Blank(s)	Blank(s)	Blank(s)
21	74	1928	2003	Male	White	C34.1-Upper lobe, lung	8013/3: Large cell neuroendocrine carcinoma	Poorly differentiated; Grade III	8.3 Carcinoma of trachea,bronchus, and lung	Unclassified	XI(f) Other and unspecified carcinomas	Left - origin of primary	Positive histology	Blank(s)	Blank(s)	40	40	Blank(s)	Blank(s)	Blank(s)	Blank(s)	Blank(s)	Blank(s)	TX	NX	M1	Blank(s)	Blank(s)	Distant	Distant site(s)/node(s) involved	Blank(s)	0	None	None; diagnosed at autopsy	No radiation and/or cancer-directed surgery	Not recommended	Beam radiation	Blank(s)	Blank(s)	Blank(s)	Blank(s)	Blank(s)	Blank(s)	Blank(s)	Blank(s)	Blank(s)	Blank(s)	Blank(s)	Blank(s)
22	70	1934	2004	Male	Other (American Indian/AK Native, Asian/Pacific Islander)	C34.3-Lower lobe, lung	8013/3: Large cell neuroendocrine carcinoma	Undifferentiated; anaplastic; Grade IV	8.3 Carcinoma of trachea,bronchus, and lung	Unclassified	XI(f) Other and unspecified carcinomas	Right - origin of primary	Positive histology	Blank(s)	IB	Blank(s)	Blank(s)	Blank(s)	Blank(s)	Blank(s)	T2	N0	M0	Blank(s)	Blank(s)	Blank(s)	L	L	Localized	Blank(s)	Blank(s)	33	1 to 3 regional lymph nodes removed	None; diagnosed at autopsy	No radiation and/or cancer-directed surgery	Surgery performed	None	Blank(s)	Blank(s)	Blank(s)	Blank(s)	Blank(s)	50	100	0	0	988	Blank(s)	Blank(s)
23	76	1928	2004	Female	White	C34.9-Lung, NOS	8013/3: Large cell neuroendocrine carcinoma	Unknown	8.3 Carcinoma of trachea,bronchus, and lung	Unclassified	XI(f) Other and unspecified carcinomas	Right - origin of primary	Positive histology	Blank(s)	IV	Blank(s)	Blank(s)	Blank(s)	Blank(s)	Blank(s)	T3	N3	M1	Blank(s)	Blank(s)	Blank(s)	D	D	Distant	Blank(s)	Blank(s)	0	None	None; diagnosed at autopsy	No radiation and/or cancer-directed surgery	Not recommended	None	Blank(s)	Blank(s)	Blank(s)	Blank(s)	Blank(s)	120	500	600	40	988	Blank(s)	Blank(s)
24	59	1944	2004	Male	White	C34.1-Upper lobe, lung	8013/3: Large cell neuroendocrine carcinoma	Unknown	8.3 Carcinoma of trachea,bronchus, and lung	Unclassified	XI(f) Other and unspecified carcinomas	Right - origin of primary	Positive histology	Blank(s)	IA	Blank(s)	Blank(s)	Blank(s)	Blank(s)	Blank(s)	T1	N0	M0	Blank(s)	Blank(s)	Blank(s)	L	L	Localized	Blank(s)	Blank(s)	21	None	None; diagnosed at autopsy	No radiation and/or cancer-directed surgery	Surgery performed	None	Blank(s)	Blank(s)	Blank(s)	Blank(s)	Blank(s)	15	100	0	0	988	Blank(s)	Blank(s)
25	63	1945	2009	Male	White	C34.1-Upper lobe, lung	8013/3: Large cell neuroendocrine carcinoma	Undifferentiated; anaplastic; Grade IV	8.3 Carcinoma of trachea,bronchus, and lung	Unclassified	XI(f) Other and unspecified carcinomas	Left - origin of primary	Positive histology	Blank(s)	IA	Blank(s)	Blank(s)	Blank(s)	Blank(s)	Blank(s)	T1	N0	M0	Blank(s)	Blank(s)	Blank(s)	L	L	Localized	Blank(s)	Blank(s)	21	None	None; diagnosed at autopsy	No radiation and/or cancer-directed surgery	Surgery performed	None	Blank(s)	Blank(s)	Blank(s)	Blank(s)	Blank(s)	17	100	0	0	988	Blank(s)	Blank(s)
26	46	1958	2004	Male	Other (American Indian/AK Native, Asian/Pacific Islander)	C34.1-Upper lobe, lung	8013/3: Large cell neuroendocrine carcinoma	Unknown	8.3 Carcinoma of trachea,bronchus, and lung	Unclassified	XI(f) Other and unspecified carcinomas	Left - origin of primary	Positive histology	Blank(s)	IV	Blank(s)	Blank(s)	Blank(s)	Blank(s)	Blank(s)	T2	N0	M1	Blank(s)	Blank(s)	Blank(s)	D	D	Distant	Blank(s)	Blank(s)	45	4 or more regional lymph nodes removed	None; diagnosed at autopsy	Radiation prior to surgery	Surgery performed	Beam radiation	Blank(s)	Blank(s)	Blank(s)	Blank(s)	Blank(s)	33	100	0	40	988	Blank(s)	Blank(s)
27	66	1947	2013	Female	White	C34.1-Upper lobe, lung	8013/3: Large cell neuroendocrine carcinoma	Poorly differentiated; Grade III	8.3 Carcinoma of trachea,bronchus, and lung	Unclassified	XI(f) Other and unspecified carcinomas	Left - origin of primary	Positive histology	IA	IA	Blank(s)	Blank(s)	T1a	N0	M0	T1	N0	M0	Blank(s)	Blank(s)	Blank(s)	L	L	Localized	Blank(s)	Blank(s)	21	4 or more regional lymph nodes removed	None; diagnosed at autopsy	No radiation and/or cancer-directed surgery	Surgery performed	None	Blank(s)	Blank(s)	Blank(s)	Blank(s)	Blank(s)	16	115	0	0	0	0	Blank(s)
28	85	1919	2005	Male	White	C34.9-Lung, NOS	8013/3: Large cell neuroendocrine carcinoma	Unknown	8.3 Carcinoma of trachea,bronchus, and lung	Unclassified	XI(f) Other and unspecified carcinomas	Right - origin of primary	Positive exfoliative cytology, no positive histology	Blank(s)	IV	Blank(s)	Blank(s)	Blank(s)	Blank(s)	Blank(s)	T4	N2	M1	Blank(s)	Blank(s)	Blank(s)	D	D	Distant	Blank(s)	Blank(s)	0	None	None; diagnosed at autopsy	No radiation and/or cancer-directed surgery	Not recommended	None	Blank(s)	Blank(s)	Blank(s)	Blank(s)	Blank(s)	25	720	200	40	988	Blank(s)	Blank(s)
29	82	1922	2005	Female	White	C34.9-Lung, NOS	8013/3: Large cell neuroendocrine carcinoma	Unknown	8.3 Carcinoma of trachea,bronchus, and lung	Unclassified	XI(f) Other and unspecified carcinomas	Right - origin of primary	Positive histology	Blank(s)	IV	Blank(s)	Blank(s)	Blank(s)	Blank(s)	Blank(s)	T4	N2	M1	Blank(s)	Blank(s)	Blank(s)	D	D	Distant	Blank(s)	Blank(s)	0	None	None; diagnosed at autopsy	No radiation and/or cancer-directed surgery	Not recommended	None	Blank(s)	Blank(s)	Blank(s)	Blank(s)	Blank(s)	999	720	200	40	988	Blank(s)	Blank(s)
30	82	1923	2005	Male	White	C34.1-Upper lobe, lung	8013/3: Large cell neuroendocrine carcinoma	Poorly differentiated; Grade III	8.3 Carcinoma of trachea,bronchus, and lung	Unclassified	XI(f) Other and unspecified carcinomas	Left - origin of primary	Positive histology	Blank(s)	IB	Blank(s)	Blank(s)	Blank(s)	Blank(s)	Blank(s)	T2	N0	M0	Blank(s)	Blank(s)	Blank(s)	L	L	Localized	Blank(s)	Blank(s)	22	1 to 3 regional lymph nodes removed	None; diagnosed at autopsy	No radiation and/or cancer-directed surgery	Surgery performed	None	Blank(s)	Blank(s)	Blank(s)	Blank(s)	Blank(s)	31	100	0	0	988	Blank(s)	Blank(s)
31	63	1942	2005	Female	White	C34.1-Upper lobe, lung	8013/3: Large cell neuroendocrine carcinoma	Unknown	8.3 Carcinoma of trachea,bronchus, and lung	Unclassified	XI(f) Other and unspecified carcinomas	Right - origin of primary	Positive histology	Blank(s)	IA	Blank(s)	Blank(s)	Blank(s)	Blank(s)	Blank(s)	T1	N0	M0	Blank(s)	Blank(s)	Blank(s)	L	L	Localized	Blank(s)	Blank(s)	30	4 or more regional lymph nodes removed	None; diagnosed at autopsy	No radiation and/or cancer-directed surgery	Surgery performed	None	Blank(s)	Blank(s)	Blank(s)	Blank(s)	Blank(s)	17	100	0	0	988	Blank(s)	Blank(s)
32	52	1954	2006	Female	Black	C34.3-Lower lobe, lung	8013/3: Large cell neuroendocrine carcinoma	Unknown	8.3 Carcinoma of trachea,bronchus, and lung	Unclassified	XI(f) Other and unspecified carcinomas	Right - origin of primary	Positive histology	Blank(s)	IB	Blank(s)	Blank(s)	Blank(s)	Blank(s)	Blank(s)	T2	N0	M0	Blank(s)	Blank(s)	Blank(s)	L	L	Localized	Blank(s)	Blank(s)	33	4 or more regional lymph nodes removed	None; diagnosed at autopsy	No radiation and/or cancer-directed surgery	Surgery performed	None	Blank(s)	Blank(s)	Blank(s)	Blank(s)	Blank(s)	38	300	0	0	988	Blank(s)	Blank(s)
33	74	1931	2005	Female	Other (American Indian/AK Native, Asian/Pacific Islander)	C34.1-Upper lobe, lung	8013/3: Large cell neuroendocrine carcinoma	Unknown	8.3 Carcinoma of trachea,bronchus, and lung	Unclassified	XI(f) Other and unspecified carcinomas	Left - origin of primary	Positive histology	Blank(s)	IA	Blank(s)	Blank(s)	Blank(s)	Blank(s)	Blank(s)	T1	N0	M0	Blank(s)	Blank(s)	Blank(s)	L	L	Localized	Blank(s)	Blank(s)	30	4 or more regional lymph nodes removed	None; diagnosed at autopsy	No radiation and/or cancer-directed surgery	Surgery performed	None	Blank(s)	Blank(s)	Blank(s)	Blank(s)	Blank(s)	30	100	0	0	988	Blank(s)	Blank(s)
34	67	1938	2005	Female	White	C34.1-Upper lobe, lung	8013/3: Large cell neuroendocrine carcinoma	Poorly differentiated; Grade III	8.3 Carcinoma of trachea,bronchus, and lung	Unclassified	XI(f) Other and unspecified carcinomas	Right - origin of primary	Positive histology	Blank(s)	IV	Blank(s)	Blank(s)	Blank(s)	Blank(s)	Blank(s)	T2	N3	M1	Blank(s)	Blank(s)	Blank(s)	D	D	Distant	Blank(s)	Blank(s)	0	None	None; diagnosed at autopsy	No radiation and/or cancer-directed surgery	Not recommended	None	Blank(s)	Blank(s)	Blank(s)	Blank(s)	Blank(s)	68	300	600	35	988	Blank(s)	Blank(s)
35	44	1962	2006	Male	Other (American Indian/AK Native, Asian/Pacific Islander)	C34.1-Upper lobe, lung	8013/3: Large cell neuroendocrine carcinoma	Unknown	8.3 Carcinoma of trachea,bronchus, and lung	Unclassified	XI(f) Other and unspecified carcinomas	Right - origin of primary	Positive histology	Blank(s)	IIIB	Blank(s)	Blank(s)	Blank(s)	Blank(s)	Blank(s)	T4	N2	M0	Blank(s)	Blank(s)	Blank(s)	RE+RN	RE+RN	Regional	Blank(s)	Blank(s)	0	None	None; diagnosed at autopsy	No radiation and/or cancer-directed surgery	Not recommended	Beam radiation	Blank(s)	Blank(s)	Blank(s)	Blank(s)	Blank(s)	100	700	200	0	988	Blank(s)	Blank(s)
36	66	1940	2006	Female	White	C34.1-Upper lobe, lung	8013/3: Large cell neuroendocrine carcinoma	Unknown	8.3 Carcinoma of trachea,bronchus, and lung	Unclassified	XI(f) Other and unspecified carcinomas	Left - origin of primary	Positive histology	Blank(s)	IV	Blank(s)	Blank(s)	Blank(s)	Blank(s)	Blank(s)	T1	N0	M1	Blank(s)	Blank(s)	Blank(s)	L	D	Distant	Blank(s)	Blank(s)	0	None	None; diagnosed at autopsy	No radiation and/or cancer-directed surgery	Not recommended	None	Blank(s)	Blank(s)	Blank(s)	Blank(s)	Blank(s)	20	100	0	35	988	Blank(s)	Blank(s)
37	67	1939	2007	Female	Other (American Indian/AK Native, Asian/Pacific Islander)	C34.3-Lower lobe, lung	8013/3: Large cell neuroendocrine carcinoma	Undifferentiated; anaplastic; Grade IV	8.3 Carcinoma of trachea,bronchus, and lung	Unclassified	XI(f) Other and unspecified carcinomas	Left - origin of primary	Positive histology	Blank(s)	IIIA	Blank(s)	Blank(s)	Blank(s)	Blank(s)	Blank(s)	T3	N1	M0	Blank(s)	Blank(s)	Blank(s)	D	RE+RN	Regional	Blank(s)	Blank(s)	56	4 or more regional lymph nodes removed	None; diagnosed at autopsy	No radiation and/or cancer-directed surgery	Surgery performed	None	Blank(s)	Blank(s)	Blank(s)	Blank(s)	Blank(s)	70	600	100	0	988	Blank(s)	Blank(s)
38	65	1941	2007	Male	Black	C34.1-Upper lobe, lung	8013/3: Large cell neuroendocrine carcinoma	Unknown	8.3 Carcinoma of trachea,bronchus, and lung	Unclassified	XI(f) Other and unspecified carcinomas	Right - origin of primary	Positive histology	Blank(s)	IV	Blank(s)	Blank(s)	Blank(s)	Blank(s)	Blank(s)	T2	N2	M1	Blank(s)	Blank(s)	Blank(s)	D	D	Distant	Blank(s)	Blank(s)	0	None	None; diagnosed at autopsy	No radiation and/or cancer-directed surgery	Not recommended	None	Blank(s)	Blank(s)	Blank(s)	Blank(s)	Blank(s)	53	100	200	40	988	Blank(s)	Blank(s)
39	78	1928	2007	Female	White	C34.1-Upper lobe, lung	8013/3: Large cell neuroendocrine carcinoma	Poorly differentiated; Grade III	8.3 Carcinoma of trachea,bronchus, and lung	Unclassified	XI(f) Other and unspecified carcinomas	Right - origin of primary	Positive histology	Blank(s)	IB	Blank(s)	Blank(s)	Blank(s)	Blank(s)	Blank(s)	T2	N0	M0	Blank(s)	Blank(s)	Blank(s)	RE	RE	Regional	Blank(s)	Blank(s)	33	1 to 3 regional lymph nodes removed	None; diagnosed at autopsy	No radiation and/or cancer-directed surgery	Surgery performed	None	Blank(s)	Blank(s)	Blank(s)	Blank(s)	Blank(s)	12	430	0	0	0	Blank(s)	Blank(s)
40	70	1937	2007	Male	White	C34.1-Upper lobe, lung	8013/3: Large cell neuroendocrine carcinoma	Poorly differentiated; Grade III	8.3 Carcinoma of trachea,bronchus, and lung	Unclassified	XI(f) Other and unspecified carcinomas	Left - origin of primary	Positive histology	Blank(s)	IIA	Blank(s)	Blank(s)	Blank(s)	Blank(s)	Blank(s)	T1	N1	M0	Blank(s)	Blank(s)	Blank(s)	RN	RN	Regional	Blank(s)	Blank(s)	33	4 or more regional lymph nodes removed	None; diagnosed at autopsy	No radiation and/or cancer-directed surgery	Surgery performed	None	Blank(s)	Blank(s)	Blank(s)	Blank(s)	Blank(s)	25	100	100	0	988	Blank(s)	Blank(s)
41	50	1957	2007	Male	Other (American Indian/AK Native, Asian/Pacific Islander)	C34.3-Lower lobe, lung	8013/3: Large cell neuroendocrine carcinoma	Unknown	8.3 Carcinoma of trachea,bronchus, and lung	Unclassified	XI(f) Other and unspecified carcinomas	Left - origin of primary	Positive histology	Blank(s)	IV	Blank(s)	Blank(s)	Blank(s)	Blank(s)	Blank(s)	T2	N0	M1	Blank(s)	Blank(s)	Blank(s)	D	D	Distant	Blank(s)	Blank(s)	0	None	None; diagnosed at autopsy	No radiation and/or cancer-directed surgery	Not recommended	Beam radiation	Blank(s)	Blank(s)	Blank(s)	Blank(s)	Blank(s)	31	300	0	40	988	Blank(s)	Blank(s)
42	60	1944	2005	Male	White	C34.1-Upper lobe, lung	8013/3: Large cell neuroendocrine carcinoma	Unknown	8.3 Carcinoma of trachea,bronchus, and lung	Unclassified	XI(f) Other and unspecified carcinomas	Left - origin of primary	Positive histology	Blank(s)	IIB	Blank(s)	Blank(s)	Blank(s)	Blank(s)	Blank(s)	T3	N0	M0	Blank(s)	Blank(s)	Blank(s)	D	RE	Regional	Blank(s)	Blank(s)	33	4 or more regional lymph nodes removed	None; diagnosed at autopsy	No radiation and/or cancer-directed surgery	Surgery performed	None	Blank(s)	Blank(s)	Blank(s)	Blank(s)	Blank(s)	78	600	0	0	988	Blank(s)	Blank(s)
43	76	1932	2008	Male	Other (American Indian/AK Native, Asian/Pacific Islander)	C34.9-Lung, NOS	8013/3: Large cell neuroendocrine carcinoma	Undifferentiated; anaplastic; Grade IV	8.3 Carcinoma of trachea,bronchus, and lung	Unclassified	XI(f) Other and unspecified carcinomas	Paired site, but no information concerning laterality	Positive histology	Blank(s)	IV	Blank(s)	Blank(s)	Blank(s)	Blank(s)	Blank(s)	T4	N3	M1	Blank(s)	Blank(s)	Blank(s)	D	D	Distant	Blank(s)	Blank(s)	0	Biopsy or aspiration of regional lymph node, NOS	None; diagnosed at autopsy	Radiation after surgery	Not recommended	Beam radiation	Blank(s)	Blank(s)	Blank(s)	Blank(s)	Blank(s)	80	800	600	40	988	Blank(s)	Blank(s)
44	65	1943	2008	Female	Black	C34.9-Lung, NOS	8013/3: Large cell neuroendocrine carcinoma	Unknown	8.3 Carcinoma of trachea,bronchus, and lung	Unclassified	XI(f) Other and unspecified carcinomas	Left - origin of primary	Positive exfoliative cytology, no positive histology	Blank(s)	IV	Blank(s)	Blank(s)	Blank(s)	Blank(s)	Blank(s)	T4	N3	M1	Blank(s)	Blank(s)	Blank(s)	D	D	Distant	Blank(s)	Blank(s)	0	Biopsy or aspiration of regional lymph node, NOS	None; diagnosed at autopsy	No radiation and/or cancer-directed surgery	Not recommended	None	Blank(s)	Blank(s)	Blank(s)	Blank(s)	Blank(s)	117	790	600	23	988	Blank(s)	Blank(s)
45	60	1948	2008	Female	White	C34.3-Lower lobe, lung	8013/3: Large cell neuroendocrine carcinoma	Unknown	8.3 Carcinoma of trachea,bronchus, and lung	Unclassified	XI(f) Other and unspecified carcinomas	Right - origin of primary	Positive histology	Blank(s)	IIA	Blank(s)	Blank(s)	Blank(s)	Blank(s)	Blank(s)	T1	N1	M0	Blank(s)	Blank(s)	Blank(s)	RN	RN	Regional	Blank(s)	Blank(s)	21	4 or more regional lymph nodes removed	None; diagnosed at autopsy	Radiation after surgery	Surgery performed	Beam radiation	Blank(s)	Blank(s)	Blank(s)	Blank(s)	Blank(s)	16	100	100	0	988	Blank(s)	Blank(s)
46	80	1928	2008	Female	White	C34.1-Upper lobe, lung	8013/3: Large cell neuroendocrine carcinoma	Unknown	8.3 Carcinoma of trachea,bronchus, and lung	Unclassified	XI(f) Other and unspecified carcinomas	Left - origin of primary	Positive histology	Blank(s)	IV	Blank(s)	Blank(s)	Blank(s)	Blank(s)	Blank(s)	T2	N2	M1	Blank(s)	Blank(s)	Blank(s)	D	D	Distant	Blank(s)	Blank(s)	0	None	None; diagnosed at autopsy	No radiation and/or cancer-directed surgery	Not recommended	Refused	Blank(s)	Blank(s)	Blank(s)	Blank(s)	Blank(s)	33	100	200	40	988	Blank(s)	Blank(s)
47	49	1959	2008	Male	White	C34.1-Upper lobe, lung	8013/3: Large cell neuroendocrine carcinoma	Unknown	8.3 Carcinoma of trachea,bronchus, and lung	Unclassified	XI(f) Other and unspecified carcinomas	Right - origin of primary	Positive histology	Blank(s)	IV	Blank(s)	Blank(s)	Blank(s)	Blank(s)	Blank(s)	T3	N3	M1	Blank(s)	Blank(s)	Blank(s)	D	D	Distant	Blank(s)	Blank(s)	0	Unknown or not applicable	None; diagnosed at autopsy	No radiation and/or cancer-directed surgery	Not recommended	Beam radiation	Blank(s)	Blank(s)	Blank(s)	Blank(s)	Blank(s)	115	730	600	50	988	Blank(s)	Blank(s)
48	46	1962	2009	Female	Other (American Indian/AK Native, Asian/Pacific Islander)	C34.3-Lower lobe, lung	8013/3: Large cell neuroendocrine carcinoma	Undifferentiated; anaplastic; Grade IV	8.3 Carcinoma of trachea,bronchus, and lung	Unclassified	XI(f) Other and unspecified carcinomas	Right - origin of primary	Positive histology	Blank(s)	IV	Blank(s)	Blank(s)	Blank(s)	Blank(s)	Blank(s)	T4	N2	M1	Blank(s)	Blank(s)	Blank(s)	D	D	Distant	Blank(s)	Blank(s)	0	None	None; diagnosed at autopsy	No radiation and/or cancer-directed surgery	Not recommended	None	Blank(s)	Blank(s)	Blank(s)	Blank(s)	Blank(s)	90	760	200	35	988	Blank(s)	Blank(s)
49	60	1948	2009	Female	Black	C34.9-Lung, NOS	8013/3: Large cell neuroendocrine carcinoma	Unknown	8.3 Carcinoma of trachea,bronchus, and lung	Unclassified	XI(f) Other and unspecified carcinomas	Right - origin of primary	Positive histology	Blank(s)	UNK Stage	Blank(s)	Blank(s)	Blank(s)	Blank(s)	Blank(s)	TX	N2	MX	Blank(s)	Blank(s)	Blank(s)	RN	RN	Regional	Blank(s)	Blank(s)	0	None	None; diagnosed at autopsy	No radiation and/or cancer-directed surgery	Unknown; death certificate; or autopsy only (2003+)	None	Blank(s)	Blank(s)	Blank(s)	Blank(s)	Blank(s)	999	999	200	99	988	Blank(s)	Blank(s)
50	50	1958	2008	Male	White	C34.1-Upper lobe, lung	8013/3: Large cell neuroendocrine carcinoma	Unknown	8.3 Carcinoma of trachea,bronchus, and lung	Unclassified	XI(f) Other and unspecified carcinomas	Right - origin of primary	Positive histology	Blank(s)	IB	Blank(s)	Blank(s)	Blank(s)	Blank(s)	Blank(s)	T2	N0	M0	Blank(s)	Blank(s)	Blank(s)	RE	RE	Regional	Blank(s)	Blank(s)	33	4 or more regional lymph nodes removed	None; diagnosed at autopsy	No radiation and/or cancer-directed surgery	Surgery performed	None	Blank(s)	Blank(s)	Blank(s)	Blank(s)	Blank(s)	9	450	0	0	988	Blank(s)	Blank(s)
51	79	1930	2009	Female	Black	C34.1-Upper lobe, lung	8013/3: Large cell neuroendocrine carcinoma	Unknown	8.3 Carcinoma of trachea,bronchus, and lung	Unclassified	XI(f) Other and unspecified carcinomas	Right - origin of primary	Positive histology	Blank(s)	IV	Blank(s)	Blank(s)	Blank(s)	Blank(s)	Blank(s)	T4	NX	M1	Blank(s)	Blank(s)	Blank(s)	D	D	Distant	Blank(s)	Blank(s)	0	None	Non-primary surgical procedure to distant site	Radiation prior to surgery	Not recommended	Beam radiation	Blank(s)	Blank(s)	Blank(s)	Blank(s)	Blank(s)	15	650	999	50	988	Blank(s)	Blank(s)
52	76	1932	2009	Male	White	C34.1-Upper lobe, lung	8013/3: Large cell neuroendocrine carcinoma	Unknown	8.3 Carcinoma of trachea,bronchus, and lung	Unclassified	XI(f) Other and unspecified carcinomas	Right - origin of primary	Positive histology	Blank(s)	IA	Blank(s)	Blank(s)	Blank(s)	Blank(s)	Blank(s)	T1	N0	M0	Blank(s)	Blank(s)	Blank(s)	L	L	Localized	Blank(s)	Blank(s)	33	4 or more regional lymph nodes removed	None; diagnosed at autopsy	No radiation and/or cancer-directed surgery	Surgery performed	None	Blank(s)	Blank(s)	Blank(s)	Blank(s)	Blank(s)	14	100	0	0	988	Blank(s)	Blank(s)
53	54	1954	2009	Female	Other (American Indian/AK Native, Asian/Pacific Islander)	C34.3-Lower lobe, lung	8013/3: Large cell neuroendocrine carcinoma	Unknown	8.3 Carcinoma of trachea,bronchus, and lung	Unclassified	XI(f) Other and unspecified carcinomas	Right - origin of primary	Positive histology	Blank(s)	IV	Blank(s)	Blank(s)	Blank(s)	Blank(s)	Blank(s)	T1	N2	M1	Blank(s)	Blank(s)	Blank(s)	D	D	Distant	Blank(s)	Blank(s)	0	None	Non-primary surgical procedure to distant site	Radiation after surgery	Not recommended	Beam radiation	Blank(s)	Blank(s)	Blank(s)	Blank(s)	Blank(s)	12	100	200	40	988	Blank(s)	Blank(s)
54	87	1922	2009	Male	White	C34.9-Lung, NOS	8013/3: Large cell neuroendocrine carcinoma	Unknown	8.3 Carcinoma of trachea,bronchus, and lung	Unclassified	XI(f) Other and unspecified carcinomas	Right - origin of primary	Positive histology	Blank(s)	IV	Blank(s)	Blank(s)	Blank(s)	Blank(s)	Blank(s)	T4	N2	M1	Blank(s)	Blank(s)	Blank(s)	D	D	Distant	Blank(s)	Blank(s)	0	None	None; diagnosed at autopsy	No radiation and/or cancer-directed surgery	Recommended but not performed, unknown reason	None	Blank(s)	Blank(s)	Blank(s)	Blank(s)	Blank(s)	999	780	200	40	988	Blank(s)	Blank(s)
55	59	1949	2009	Male	Black	C34.3-Lower lobe, lung	8013/3: Large cell neuroendocrine carcinoma	Unknown	8.3 Carcinoma of trachea,bronchus, and lung	Unclassified	XI(f) Other and unspecified carcinomas	Left - origin of primary	Positive histology	Blank(s)	IIB	Blank(s)	Blank(s)	Blank(s)	Blank(s)	Blank(s)	T2	N1	M0	Blank(s)	Blank(s)	Blank(s)	RE+RN	RE+RN	Regional	Blank(s)	Blank(s)	33	4 or more regional lymph nodes removed	None; diagnosed at autopsy	No radiation and/or cancer-directed surgery	Surgery performed	None	Blank(s)	Blank(s)	Blank(s)	Blank(s)	Blank(s)	37	450	100	0	988	Blank(s)	Blank(s)
56	71	1938	2009	Male	White	C34.1-Upper lobe, lung	8013/3: Large cell neuroendocrine carcinoma	Unknown	8.3 Carcinoma of trachea,bronchus, and lung	Unclassified	XI(f) Other and unspecified carcinomas	Right - origin of primary	Positive histology	Blank(s)	IB	Blank(s)	Blank(s)	Blank(s)	Blank(s)	Blank(s)	T2	N0	M0	Blank(s)	Blank(s)	Blank(s)	L	L	Localized	Blank(s)	Blank(s)	33	4 or more regional lymph nodes removed	None; diagnosed at autopsy	No radiation and/or cancer-directed surgery	Surgery performed	None	Blank(s)	Blank(s)	Blank(s)	Blank(s)	Blank(s)	35	100	0	0	988	Blank(s)	Blank(s)
57	82	1927	2009	Female	White	C34.1-Upper lobe, lung	8013/3: Large cell neuroendocrine carcinoma	Unknown	8.3 Carcinoma of trachea,bronchus, and lung	Unclassified	XI(f) Other and unspecified carcinomas	Left - origin of primary	Positive histology	Blank(s)	IV	Blank(s)	Blank(s)	Blank(s)	Blank(s)	Blank(s)	T1	N3	M1	Blank(s)	Blank(s)	Blank(s)	D	D	Distant	Blank(s)	Blank(s)	0	None	None; diagnosed at autopsy	No radiation and/or cancer-directed surgery	Not recommended	Refused	Blank(s)	Blank(s)	Blank(s)	Blank(s)	Blank(s)	10	300	600	50	988	Blank(s)	Blank(s)
58	71	1940	2011	Female	Other (American Indian/AK Native, Asian/Pacific Islander)	C34.3-Lower lobe, lung	8013/3: Large cell neuroendocrine carcinoma	Undifferentiated; anaplastic; Grade IV	8.3 Carcinoma of trachea,bronchus, and lung	Unclassified	XI(f) Other and unspecified carcinomas	Left - origin of primary	Positive histology	IB	IB	Blank(s)	Blank(s)	T2a	N0	M0	T2	N0	M0	Blank(s)	Blank(s)	Blank(s)	L	L	Localized	Blank(s)	Blank(s)	21	None	None; diagnosed at autopsy	Radiation prior to surgery	Surgery performed	Beam radiation	Blank(s)	Blank(s)	Blank(s)	Blank(s)	Blank(s)	46	100	0	0	0	0	Blank(s)
59	48	1962	2010	Female	Other (American Indian/AK Native, Asian/Pacific Islander)	C34.3-Lower lobe, lung	8013/3: Large cell neuroendocrine carcinoma	Undifferentiated; anaplastic; Grade IV	8.3 Carcinoma of trachea,bronchus, and lung	Unclassified	XI(f) Other and unspecified carcinomas	Left - origin of primary	Positive histology	IIB	IIB	Blank(s)	Blank(s)	T3	N0	M0	T3	N0	M0	Blank(s)	Blank(s)	Blank(s)	RE	RE	Regional	Blank(s)	Blank(s)	33	4 or more regional lymph nodes removed	None; diagnosed at autopsy	No radiation and/or cancer-directed surgery	Surgery performed	None	Blank(s)	Blank(s)	Blank(s)	Blank(s)	Blank(s)	71	570	0	0	0	0	Blank(s)
60	58	1951	2010	Male	Other (American Indian/AK Native, Asian/Pacific Islander)	C34.1-Upper lobe, lung	8013/3: Large cell neuroendocrine carcinoma	Unknown	8.3 Carcinoma of trachea,bronchus, and lung	Unclassified	XI(f) Other and unspecified carcinomas	Right - origin of primary	Positive histology	IV	IV	Blank(s)	Blank(s)	T2a	N2	M1b	T2	N2	M1	Blank(s)	Blank(s)	Blank(s)	D	D	Distant	Blank(s)	Blank(s)	0	None	None; diagnosed at autopsy	No radiation and/or cancer-directed surgery	Not recommended	None	Blank(s)	Blank(s)	Blank(s)	Blank(s)	Blank(s)	37	200	200	40	0	998	Blank(s)
61	72	1937	2010	Male	White	C34.3-Lower lobe, lung	8013/3: Large cell neuroendocrine carcinoma	Unknown	8.3 Carcinoma of trachea,bronchus, and lung	Unclassified	XI(f) Other and unspecified carcinomas	Right - origin of primary	Positive histology	IIIB	IIIB	Blank(s)	Blank(s)	T4	N2	M0	T4	N2	M0	Blank(s)	Blank(s)	Blank(s)	RE+RN	RE+RN	Regional	Blank(s)	Blank(s)	0	None	None; diagnosed at autopsy	No radiation and/or cancer-directed surgery	Not recommended	Beam radiation	Blank(s)	Blank(s)	Blank(s)	Blank(s)	Blank(s)	33	700	200	0	10	0	Blank(s)
62	85	1925	2010	Female	White	C34.1-Upper lobe, lung	8013/3: Large cell neuroendocrine carcinoma	Unknown	8.3 Carcinoma of trachea,bronchus, and lung	Unclassified	XI(f) Other and unspecified carcinomas	Right - origin of primary	Positive histology	IV	IV	Blank(s)	Blank(s)	T2a	N0	M1b	T2	N0	M1	Blank(s)	Blank(s)	Blank(s)	D	D	Distant	Blank(s)	Blank(s)	0	None	None; diagnosed at autopsy	No radiation and/or cancer-directed surgery	Not recommended	None	Blank(s)	Blank(s)	Blank(s)	Blank(s)	Blank(s)	50	100	0	40	0	998	Blank(s)
63	62	1947	2010	Male	Other (American Indian/AK Native, Asian/Pacific Islander)	C34.1-Upper lobe, lung	8013/3: Large cell neuroendocrine carcinoma	Unknown	8.3 Carcinoma of trachea,bronchus, and lung	Unclassified	XI(f) Other and unspecified carcinomas	Right - origin of primary	Positive histology	IIIA	IIIB	Blank(s)	Blank(s)	T4	N0	M0	T4	N0	M0	Blank(s)	Blank(s)	Blank(s)	D	D	Distant	Blank(s)	Blank(s)	0	None	Non-primary surgical procedure to other regional sites	Radiation after surgery	Not recommended	Beam radiation	Blank(s)	Blank(s)	Blank(s)	Blank(s)	Blank(s)	120	785	0	0	0	998	Blank(s)
64	80	1930	2010	Male	White	C34.1-Upper lobe, lung	8013/3: Large cell neuroendocrine carcinoma	Poorly differentiated; Grade III	8.3 Carcinoma of trachea,bronchus, and lung	Unclassified	XI(f) Other and unspecified carcinomas	Right - origin of primary	Positive histology	IA	IA	Blank(s)	Blank(s)	T1a	N0	M0	T1	N0	M0	Blank(s)	Blank(s)	Blank(s)	L	L	Localized	Blank(s)	Blank(s)	22	4 or more regional lymph nodes removed	None; diagnosed at autopsy	No radiation and/or cancer-directed surgery	Surgery performed	None	Blank(s)	Blank(s)	Blank(s)	Blank(s)	Blank(s)	10	100	0	0	0	0	Blank(s)
65	58	1953	2011	Female	White	C34.3-Lower lobe, lung	8013/3: Large cell neuroendocrine carcinoma	Undifferentiated; anaplastic; Grade IV	8.3 Carcinoma of trachea,bronchus, and lung	Unclassified	XI(f) Other and unspecified carcinomas	Left - origin of primary	Positive exfoliative cytology, no positive histology	IIA	IIA	Blank(s)	Blank(s)	T1b	N1	M0	T1	N1	M0	Blank(s)	Blank(s)	Blank(s)	RN	RN	Regional	Blank(s)	Blank(s)	33	4 or more regional lymph nodes removed	None; diagnosed at autopsy	No radiation and/or cancer-directed surgery	Surgery performed	None	Blank(s)	Blank(s)	Blank(s)	Blank(s)	Blank(s)	24	100	100	0	0	0	Blank(s)
66	78	1932	2011	Female	White	C34.1-Upper lobe, lung	8013/3: Large cell neuroendocrine carcinoma	Unknown	8.3 Carcinoma of trachea,bronchus, and lung	Unclassified	XI(f) Other and unspecified carcinomas	Left - origin of primary	Positive histology	IIIA	IIIA	Blank(s)	Blank(s)	T2a	N2	M0	T2	N2	M0	Blank(s)	Blank(s)	Blank(s)	RN	RN	Regional	Blank(s)	Blank(s)	0	None	None; diagnosed at autopsy	No radiation and/or cancer-directed surgery	Recommended but not performed, patient refused	Beam radiation	Blank(s)	Blank(s)	Blank(s)	Blank(s)	Blank(s)	47	300	200	0	0	998	Blank(s)
67	64	1946	2011	Female	White	C34.1-Upper lobe, lung	8013/3: Large cell neuroendocrine carcinoma	Poorly differentiated; Grade III	8.3 Carcinoma of trachea,bronchus, and lung	Unclassified	XI(f) Other and unspecified carcinomas	Left - origin of primary	Positive histology	IIB	IIB	Blank(s)	Blank(s)	T3	N0	M0	T3	N0	M0	Blank(s)	Blank(s)	Blank(s)	RE	RE	Regional	Blank(s)	Blank(s)	21	4 or more regional lymph nodes removed	None; diagnosed at autopsy	Radiation after surgery	Surgery performed	Beam radiation	Blank(s)	Blank(s)	Blank(s)	Blank(s)	Blank(s)	40	570	0	0	0	10	Blank(s)
68	84	1926	2011	Female	Black	C34.3-Lower lobe, lung	8013/3: Large cell neuroendocrine carcinoma	Unknown	8.3 Carcinoma of trachea,bronchus, and lung	Unclassified	XI(f) Other and unspecified carcinomas	Right - origin of primary	Positive histology	IV	IV	Blank(s)	Blank(s)	T2a	N3	M1b	T2	N3	M1	Blank(s)	Blank(s)	Blank(s)	D	D	Distant	Blank(s)	Blank(s)	0	None	None; diagnosed at autopsy	No radiation and/or cancer-directed surgery	Not recommended	Beam radiation	Blank(s)	Blank(s)	Blank(s)	Blank(s)	Blank(s)	38	220	600	40	0	998	Blank(s)
69	78	1932	2011	Male	White	C34.3-Lower lobe, lung	8013/3: Large cell neuroendocrine carcinoma	Unknown	8.3 Carcinoma of trachea,bronchus, and lung	Unclassified	XI(f) Other and unspecified carcinomas	Left - origin of primary	Positive histology	IIA	IIB	Blank(s)	Blank(s)	T2a	N1	M0	T2	N1	M0	Blank(s)	Blank(s)	Blank(s)	RE+RN	RE+RN	Regional	Blank(s)	Blank(s)	30	4 or more regional lymph nodes removed	None; diagnosed at autopsy	No radiation and/or cancer-directed surgery	Surgery performed	None	Blank(s)	Blank(s)	Blank(s)	Blank(s)	Blank(s)	43	430	100	0	0	20	Blank(s)
70	58	1953	2011	Male	White	C34.9-Lung, NOS	8013/3: Large cell neuroendocrine carcinoma	Unknown	8.3 Carcinoma of trachea,bronchus, and lung	Unclassified	XI(f) Other and unspecified carcinomas	Left - origin of primary	Positive histology	IV	IIIB	Blank(s)	Blank(s)	T0	N3	M1a	T4	N3	M0	Blank(s)	Blank(s)	Blank(s)	D	D	Distant	Blank(s)	Blank(s)	0	1 to 3 regional lymph nodes removed	None; diagnosed at autopsy	No radiation and/or cancer-directed surgery	Not recommended	None	Blank(s)	Blank(s)	Blank(s)	Blank(s)	Blank(s)	0	950	600	15	0	998	Blank(s)
71	68	1942	2011	Male	Black	C34.3-Lower lobe, lung	8013/3: Large cell neuroendocrine carcinoma	Unknown	8.3 Carcinoma of trachea,bronchus, and lung	Unclassified	XI(f) Other and unspecified carcinomas	Right - origin of primary	Positive exfoliative cytology, no positive histology	IA	IA	Blank(s)	Blank(s)	T1a	N0	M0	T1	N0	M0	Blank(s)	Blank(s)	Blank(s)	L	L	Localized	Blank(s)	Blank(s)	0	None	None; diagnosed at autopsy	No radiation and/or cancer-directed surgery	Not recommended	Beam radiation	Blank(s)	Blank(s)	Blank(s)	Blank(s)	Blank(s)	16	100	0	0	0	998	Blank(s)
72	66	1945	2011	Male	Black	C34.0-Main bronchus	8013/3: Large cell neuroendocrine carcinoma	Unknown	8.3 Carcinoma of trachea,bronchus, and lung	Unclassified	XI(f) Other and unspecified carcinomas	Left - origin of primary	Positive histology	IV	IV	Blank(s)	Blank(s)	T1a	N0	M1b	T1	N0	M1	Blank(s)	Blank(s)	Blank(s)	D	D	Distant	Blank(s)	Blank(s)	0	None	Non-primary surgical procedure to distant site	Radiation after surgery	Not recommended	Beam radiation	Blank(s)	Blank(s)	Blank(s)	Blank(s)	Blank(s)	20	100	0	40	0	998	Blank(s)
73	82	1928	2011	Male	White	C34.1-Upper lobe, lung	8013/3: Large cell neuroendocrine carcinoma	Unknown	8.3 Carcinoma of trachea,bronchus, and lung	Unclassified	XI(f) Other and unspecified carcinomas	Left - origin of primary	Positive histology	IV	IV	Blank(s)	Blank(s)	T3	N0	M1b	T4	N0	M1	Blank(s)	Blank(s)	Blank(s)	D	D	Distant	Blank(s)	Blank(s)	0	None	None; diagnosed at autopsy	No radiation and/or cancer-directed surgery	Not recommended	None	Blank(s)	Blank(s)	Blank(s)	Blank(s)	Blank(s)	14	999	0	33	40	998	Blank(s)
74	72	1939	2011	Female	White	C34.9-Lung, NOS	8013/3: Large cell neuroendocrine carcinoma	Unknown	8.3 Carcinoma of trachea,bronchus, and lung	Unclassified	XI(f) Other and unspecified carcinomas	Paired site, but no information concerning laterality	Positive histology	IV	IV	Blank(s)	Blank(s)	TX	NX	M1b	TX	NX	M1	Blank(s)	Blank(s)	Blank(s)	D	D	Distant	Blank(s)	Blank(s)	0	None	None; diagnosed at autopsy	No radiation and/or cancer-directed surgery	Not recommended	None	Blank(s)	Blank(s)	Blank(s)	Blank(s)	Blank(s)	999	999	999	40	999	999	Blank(s)
75	66	1945	2012	Female	White	C34.0-Main bronchus	8013/3: Large cell neuroendocrine carcinoma	Undifferentiated; anaplastic; Grade IV	8.3 Carcinoma of trachea,bronchus, and lung	Unclassified	XI(f) Other and unspecified carcinomas	Right - origin of primary	Positive histology	IIIB	IIIB	Blank(s)	Blank(s)	T4	N3	M0	T4	N3	M0	Blank(s)	Blank(s)	Blank(s)	D	D	Distant	Blank(s)	Blank(s)	0	None	None; diagnosed at autopsy	No radiation and/or cancer-directed surgery	Not recommended	Beam radiation	Blank(s)	Blank(s)	Blank(s)	Blank(s)	Blank(s)	80	700	600	0	0	0	Blank(s)
76	71	1940	2012	Female	White	C34.9-Lung, NOS	8013/3: Large cell neuroendocrine carcinoma	Poorly differentiated; Grade III	8.3 Carcinoma of trachea,bronchus, and lung	Unclassified	XI(f) Other and unspecified carcinomas	Right - origin of primary	Positive histology	IV	IV	Blank(s)	Blank(s)	T2a	N2	M1a	T2	N2	M1	Blank(s)	Blank(s)	Blank(s)	D	D	Distant	Blank(s)	Blank(s)	0	None	None; diagnosed at autopsy	No radiation and/or cancer-directed surgery	Not recommended	None	Blank(s)	Blank(s)	Blank(s)	Blank(s)	Blank(s)	999	455	200	23	0	998	Blank(s)
77	72	1939	2011	Female	White	C34.3-Lower lobe, lung	8013/3: Large cell neuroendocrine carcinoma	Unknown	8.3 Carcinoma of trachea,bronchus, and lung	Unclassified	XI(f) Other and unspecified carcinomas	Right - origin of primary	Positive histology	IV	IV	Blank(s)	Blank(s)	T4	N2	M1b	T4	N2	M1	Blank(s)	Blank(s)	Blank(s)	D	D	Distant	Blank(s)	Blank(s)	0	None	None; diagnosed at autopsy	No radiation and/or cancer-directed surgery	Not recommended	None	Blank(s)	Blank(s)	Blank(s)	Blank(s)	Blank(s)	26	100	200	30	30	998	Blank(s)
78	57	1954	2012	Male	Other (American Indian/AK Native, Asian/Pacific Islander)	C34.1-Upper lobe, lung	8013/3: Large cell neuroendocrine carcinoma	Unknown	8.3 Carcinoma of trachea,bronchus, and lung	Unclassified	XI(f) Other and unspecified carcinomas	Right - origin of primary	Positive histology	IV	IIIB	Blank(s)	Blank(s)	T3	N3	M1a	T4	N3	M0	Blank(s)	Blank(s)	Blank(s)	D	D	Distant	Blank(s)	Blank(s)	0	None	None; diagnosed at autopsy	No radiation and/or cancer-directed surgery	Not recommended	None	Blank(s)	Blank(s)	Blank(s)	Blank(s)	Blank(s)	71	570	600	15	999	998	Blank(s)
79	55	1957	2012	Male	White	C34.1-Upper lobe, lung	8013/3: Large cell neuroendocrine carcinoma	Unknown	8.3 Carcinoma of trachea,bronchus, and lung	Unclassified	XI(f) Other and unspecified carcinomas	Right - origin of primary	Positive histology	IV	IV	Blank(s)	Blank(s)	T3	N1	M1b	T4	N1	M1	Blank(s)	Blank(s)	Blank(s)	D	D	Distant	Blank(s)	Blank(s)	0	None	None; diagnosed at autopsy	No radiation and/or cancer-directed surgery	Not recommended	Beam radiation	Blank(s)	Blank(s)	Blank(s)	Blank(s)	Blank(s)	49	999	100	40	10	998	Blank(s)
80	78	1933	2012	Male	White	C34.3-Lower lobe, lung	8013/3: Large cell neuroendocrine carcinoma	Poorly differentiated; Grade III	8.3 Carcinoma of trachea,bronchus, and lung	Unclassified	XI(f) Other and unspecified carcinomas	Right - origin of primary	Positive histology	IIIB	IIIB	Blank(s)	Blank(s)	T4	N2	M0	T4	N2	M0	Blank(s)	Blank(s)	Blank(s)	RE+RN	RE+RN	Regional	Blank(s)	Blank(s)	0	None	None; diagnosed at autopsy	No radiation and/or cancer-directed surgery	Not recommended	None	Blank(s)	Blank(s)	Blank(s)	Blank(s)	Blank(s)	48	700	200	0	40	998	Blank(s)
81	67	1944	2012	Female	White	C34.3-Lower lobe, lung	8013/3: Large cell neuroendocrine carcinoma	Undifferentiated; anaplastic; Grade IV	8.3 Carcinoma of trachea,bronchus, and lung	Unclassified	XI(f) Other and unspecified carcinomas	Right - origin of primary	Positive histology	IB	IB	Blank(s)	Blank(s)	T2a	N0	M0	T2	N0	M0	Blank(s)	Blank(s)	Blank(s)	L	L	Localized	Blank(s)	Blank(s)	33	4 or more regional lymph nodes removed	None; diagnosed at autopsy	No radiation and/or cancer-directed surgery	Surgery performed	None	Blank(s)	Blank(s)	Blank(s)	Blank(s)	Blank(s)	37	100	0	0	0	0	Blank(s)
82	61	1950	2012	Male	Black	C34.2-Middle lobe, lung	8013/3: Large cell neuroendocrine carcinoma	Unknown	8.3 Carcinoma of trachea,bronchus, and lung	Unclassified	XI(f) Other and unspecified carcinomas	Right - origin of primary	Positive histology	IV	IV	Blank(s)	Blank(s)	T1b	N1	M1b	T1	N1	M1	Blank(s)	Blank(s)	Blank(s)	D	D	Distant	Blank(s)	Blank(s)	0	None	None; diagnosed at autopsy	No radiation and/or cancer-directed surgery	Not recommended	None	Blank(s)	Blank(s)	Blank(s)	Blank(s)	Blank(s)	25	300	100	40	0	998	Blank(s)
83	59	1952	2012	Male	Black	C34.0-Main bronchus	8013/3: Large cell neuroendocrine carcinoma	Poorly differentiated; Grade III	8.3 Carcinoma of trachea,bronchus, and lung	Unclassified	XI(f) Other and unspecified carcinomas	Right - origin of primary	Positive exfoliative cytology, no positive histology	IIA	IB	Blank(s)	Blank(s)	T2b	N0	M0	T2	N0	M0	Blank(s)	Blank(s)	Blank(s)	RE	RE	Regional	Blank(s)	Blank(s)	0	None	None; diagnosed at autopsy	No radiation and/or cancer-directed surgery	Not recommended, contraindicated due to other cond; autopsy only (1973-2002)	Beam radiation	Blank(s)	Blank(s)	Blank(s)	Blank(s)	Blank(s)	58	460	0	0	0	998	Blank(s)
84	80	1931	2012	Female	Black	C34.1-Upper lobe, lung	8013/3: Large cell neuroendocrine carcinoma	Poorly differentiated; Grade III	8.3 Carcinoma of trachea,bronchus, and lung	Unclassified	XI(f) Other and unspecified carcinomas	Left - origin of primary	Positive histology	IA	IA	Blank(s)	Blank(s)	T1a	N0	M0	T1	N0	M0	Blank(s)	Blank(s)	Blank(s)	L	L	Localized	Blank(s)	Blank(s)	0	None	None; diagnosed at autopsy	No radiation and/or cancer-directed surgery	Not recommended, contraindicated due to other cond; autopsy only (1973-2002)	Beam radiation	Blank(s)	Blank(s)	Blank(s)	Blank(s)	Blank(s)	18	100	0	0	0	998	Blank(s)
85	82	1929	2012	Female	White	C34.2-Middle lobe, lung	8013/3: Large cell neuroendocrine carcinoma	Undifferentiated; anaplastic; Grade IV	8.3 Carcinoma of trachea,bronchus, and lung	Unclassified	XI(f) Other and unspecified carcinomas	Right - origin of primary	Positive histology	IIA	IB	Blank(s)	Blank(s)	T2b	N0	M0	T2	N0	M0	Blank(s)	Blank(s)	Blank(s)	L	L	Localized	Blank(s)	Blank(s)	33	4 or more regional lymph nodes removed	None; diagnosed at autopsy	No radiation and/or cancer-directed surgery	Surgery performed	Refused	Blank(s)	Blank(s)	Blank(s)	Blank(s)	Blank(s)	69	220	0	0	0	0	Blank(s)
86	75	1936	2012	Female	White	C34.1-Upper lobe, lung	8013/3: Large cell neuroendocrine carcinoma	Poorly differentiated; Grade III	8.3 Carcinoma of trachea,bronchus, and lung	Unclassified	XI(f) Other and unspecified carcinomas	Right - origin of primary	Positive histology	IIIA	IIIA	Blank(s)	Blank(s)	T1NOS	N2	M0	T1	N2	M0	Blank(s)	Blank(s)	Blank(s)	RN	RN	Regional	Blank(s)	Blank(s)	0	None	None; diagnosed at autopsy	No radiation and/or cancer-directed surgery	Not recommended	Beam radiation	Blank(s)	Blank(s)	Blank(s)	Blank(s)	Blank(s)	19	125	200	0	0	998	Blank(s)
87	63	1949	2013	Male	White	C34.1-Upper lobe, lung	8013/3: Large cell neuroendocrine carcinoma	Poorly differentiated; Grade III	8.3 Carcinoma of trachea,bronchus, and lung	Unclassified	XI(f) Other and unspecified carcinomas	Right - origin of primary	Positive histology	IA	IA	Blank(s)	Blank(s)	T1b	N0	M0	T1	N0	M0	Blank(s)	Blank(s)	Blank(s)	L	L	Localized	Blank(s)	Blank(s)	33	1 to 3 regional lymph nodes removed	None; diagnosed at autopsy	Radiation after surgery	Surgery performed	Beam radiation	Blank(s)	Blank(s)	Blank(s)	Blank(s)	Blank(s)	22	100	0	0	0	0	Blank(s)
88	52	1959	2012	Male	White	C34.1-Upper lobe, lung	8013/3: Large cell neuroendocrine carcinoma	Poorly differentiated; Grade III	8.3 Carcinoma of trachea,bronchus, and lung	Unclassified	XI(f) Other and unspecified carcinomas	Left - origin of primary	Positive histology	IV	IV	Blank(s)	Blank(s)	T2b	N0	M1b	T2	N0	M1	Blank(s)	Blank(s)	Blank(s)	D	D	Distant	Blank(s)	Blank(s)	30	1 to 3 regional lymph nodes removed	None; diagnosed at autopsy	Radiation prior to surgery	Surgery performed	Beam radiation	Blank(s)	Blank(s)	Blank(s)	Blank(s)	Blank(s)	55	300	0	70	0	0	Blank(s)
89	78	1935	2013	Female	Unknown	C34.1-Upper lobe, lung	8013/3: Large cell neuroendocrine carcinoma	Poorly differentiated; Grade III	8.3 Carcinoma of trachea,bronchus, and lung	Unclassified	XI(f) Other and unspecified carcinomas	Right - origin of primary	Positive histology	IIIB	IIIB	Blank(s)	Blank(s)	T3	N3	M0	T4	N3	M0	Blank(s)	Blank(s)	Blank(s)	D	D	Distant	Blank(s)	Blank(s)	0	None	None; diagnosed at autopsy	No radiation and/or cancer-directed surgery	Not recommended	Beam radiation	Blank(s)	Blank(s)	Blank(s)	Blank(s)	Blank(s)	15	115	600	0	10	998	Blank(s)
90	52	1958	2010	Male	White	C34.1-Upper lobe, lung	8013/3: Large cell neuroendocrine carcinoma	Unknown	8.3 Carcinoma of trachea,bronchus, and lung	Unclassified	XI(f) Other and unspecified carcinomas	Right - origin of primary	Positive histology	IV	IV	Blank(s)	Blank(s)	T4	N2	M1b	T4	N2	M1	Blank(s)	Blank(s)	Blank(s)	D	D	Distant	Blank(s)	Blank(s)	0	None	None; diagnosed at autopsy	No radiation and/or cancer-directed surgery	Not recommended	Beam radiation	Blank(s)	Blank(s)	Blank(s)	Blank(s)	Blank(s)	35	700	200	51	10	998	Blank(s)
91	86	1921	2008	Female	White	C34.8-Overlapping lesion of lung	8013/3: Large cell neuroendocrine carcinoma	Unknown	8.3 Carcinoma of trachea,bronchus, and lung	Unclassified	XI(f) Other and unspecified carcinomas	Right - origin of primary	Positive exfoliative cytology, no positive histology	Blank(s)	IIIB	Blank(s)	Blank(s)	Blank(s)	Blank(s)	Blank(s)	T4	N2	M0	Blank(s)	Blank(s)	Blank(s)	D	D	Distant	Blank(s)	Blank(s)	0	None	None; diagnosed at autopsy	No radiation and/or cancer-directed surgery	Not recommended	None	Blank(s)	Blank(s)	Blank(s)	Blank(s)	Blank(s)	999	720	200	0	988	Blank(s)	Blank(s)
92	64	1941	2006	Female	White	C34.1-Upper lobe, lung	8013/3: Large cell neuroendocrine carcinoma	Unknown	8.3 Carcinoma of trachea,bronchus, and lung	Unclassified	XI(f) Other and unspecified carcinomas	Left - origin of primary	Positive histology	Blank(s)	IA	Blank(s)	Blank(s)	Blank(s)	Blank(s)	Blank(s)	T1	N0	M0	Blank(s)	Blank(s)	Blank(s)	L	L	Localized	Blank(s)	Blank(s)	30	4 or more regional lymph nodes removed	None; diagnosed at autopsy	No radiation and/or cancer-directed surgery	Surgery performed	None	Blank(s)	Blank(s)	Blank(s)	Blank(s)	Blank(s)	25	100	0	0	988	Blank(s)	Blank(s)
93	66	1943	2010	Female	White	C34.1-Upper lobe, lung	8013/3: Large cell neuroendocrine carcinoma	Unknown	8.3 Carcinoma of trachea,bronchus, and lung	Unclassified	XI(f) Other and unspecified carcinomas	Left - origin of primary	Positive histology	IIA	IB	Blank(s)	Blank(s)	T2b	N0	M0	T2	N0	M0	Blank(s)	Blank(s)	Blank(s)	L	L	Localized	Blank(s)	Blank(s)	33	4 or more regional lymph nodes removed	None; diagnosed at autopsy	No radiation and/or cancer-directed surgery	Surgery performed	None	Blank(s)	Blank(s)	Blank(s)	Blank(s)	Blank(s)	52	100	0	0	0	0	Blank(s)
94	60	1952	2012	Male	White	C34.1-Upper lobe, lung	8013/3: Large cell neuroendocrine carcinoma	Unknown	8.3 Carcinoma of trachea,bronchus, and lung	Unclassified	XI(f) Other and unspecified carcinomas	Right - origin of primary	Positive histology	IV	IV	Blank(s)	Blank(s)	T4	NX	M1b	T4	NX	M1	Blank(s)	Blank(s)	Blank(s)	D	D	Distant	Blank(s)	Blank(s)	0	None	None; diagnosed at autopsy	No radiation and/or cancer-directed surgery	Not recommended	Beam radiation	Blank(s)	Blank(s)	Blank(s)	Blank(s)	Blank(s)	29	700	999	40	0	999	Blank(s)
95	74	1935	2009	Female	White	C34.1-Upper lobe, lung	8013/3: Large cell neuroendocrine carcinoma	Poorly differentiated; Grade III	8.3 Carcinoma of trachea,bronchus, and lung	Unclassified	XI(f) Other and unspecified carcinomas	Right - origin of primary	Positive histology	Blank(s)	IA	Blank(s)	Blank(s)	Blank(s)	Blank(s)	Blank(s)	T1	N0	M0	Blank(s)	Blank(s)	Blank(s)	L	L	Localized	Blank(s)	Blank(s)	21	Sentinel node biopsy and lym nd removed different times	None; diagnosed at autopsy	No radiation and/or cancer-directed surgery	Surgery performed	None	Blank(s)	Blank(s)	Blank(s)	Blank(s)	Blank(s)	15	100	0	0	0	Blank(s)	Blank(s)
96	63	1947	2010	Female	White	C34.3-Lower lobe, lung	8013/3: Large cell neuroendocrine carcinoma	Undifferentiated; anaplastic; Grade IV	8.3 Carcinoma of trachea,bronchus, and lung	Unclassified	XI(f) Other and unspecified carcinomas	Left - origin of primary	Positive histology	IA	IA	Blank(s)	Blank(s)	T1a	N0	M0	T1	N0	M0	Blank(s)	Blank(s)	Blank(s)	L	L	Localized	Blank(s)	Blank(s)	21	None	None; diagnosed at autopsy	No radiation and/or cancer-directed surgery	Surgery performed	None	Blank(s)	Blank(s)	Blank(s)	Blank(s)	Blank(s)	15	100	0	0	0	0	Blank(s)
97	70	1934	2004	Male	White	C34.1-Upper lobe, lung	8013/3: Large cell neuroendocrine carcinoma	Unknown	8.3 Carcinoma of trachea,bronchus, and lung	Unclassified	XI(f) Other and unspecified carcinomas	Left - origin of primary	Positive exfoliative cytology, no positive histology	Blank(s)	IV	Blank(s)	Blank(s)	Blank(s)	Blank(s)	Blank(s)	T4	N2	M1	Blank(s)	Blank(s)	Blank(s)	D	D	Distant	Blank(s)	Blank(s)	0	None	Non-primary surgical procedure performed	No radiation and/or cancer-directed surgery	Not recommended	None	Blank(s)	Blank(s)	Blank(s)	Blank(s)	Blank(s)	997	500	200	40	988	Blank(s)	Blank(s)
98	56	1953	2010	Female	White	C34.3-Lower lobe, lung	8013/3: Large cell neuroendocrine carcinoma	Poorly differentiated; Grade III	8.3 Carcinoma of trachea,bronchus, and lung	Unclassified	XI(f) Other and unspecified carcinomas	Right - origin of primary	Positive histology	IIB	IIB	Blank(s)	Blank(s)	T2b	N1	M0	T2	N1	M0	Blank(s)	Blank(s)	Blank(s)	RE+RN	RE+RN	Regional	Blank(s)	Blank(s)	30	4 or more regional lymph nodes removed	None; diagnosed at autopsy	No radiation and/or cancer-directed surgery	Surgery performed	None	Blank(s)	Blank(s)	Blank(s)	Blank(s)	Blank(s)	65	430	100	0	0	20	Blank(s)
99	78	1926	2005	Female	White	C34.1-Upper lobe, lung	8013/3: Large cell neuroendocrine carcinoma	Unknown	8.3 Carcinoma of trachea,bronchus, and lung	Unclassified	XI(f) Other and unspecified carcinomas	Right - origin of primary	Positive histology	Blank(s)	IA	Blank(s)	Blank(s)	Blank(s)	Blank(s)	Blank(s)	T1	N0	M0	Blank(s)	Blank(s)	Blank(s)	L	L	Localized	Blank(s)	Blank(s)	21	None	None; diagnosed at autopsy	No radiation and/or cancer-directed surgery	Surgery performed	None	Blank(s)	Blank(s)	Blank(s)	Blank(s)	Blank(s)	10	100	0	0	988	Blank(s)	Blank(s)
100	71	1940	2011	Female	White	C34.9-Lung, NOS	8013/3: Large cell neuroendocrine carcinoma	Unknown	8.3 Carcinoma of trachea,bronchus, and lung	Unclassified	XI(f) Other and unspecified carcinomas	Only one side - side unspecified	Positive histology	IV	IV	Blank(s)	Blank(s)	TX	N0	M1b	TX	N0	M1	Blank(s)	Blank(s)	Blank(s)	D	D	Distant	Blank(s)	Blank(s)	0	None	None; diagnosed at autopsy	No radiation and/or cancer-directed surgery	Not recommended	Beam radiation	Blank(s)	Blank(s)	Blank(s)	Blank(s)	Blank(s)	999	999	0	40	0	998	Blank(s)
101	74	1928	2003	Male	White	C34.1-Upper lobe, lung	8013/3: Large cell neuroendocrine carcinoma	Poorly differentiated; Grade III	8.3 Carcinoma of trachea,bronchus, and lung	Unclassified	XI(f) Other and unspecified carcinomas	Right - origin of primary	Positive histology	Blank(s)	Blank(s)	90	20	Blank(s)	Blank(s)	Blank(s)	Blank(s)	Blank(s)	Blank(s)	T2	NXr	M0	Blank(s)	Blank(s)	Regional	Regional by both direct extension and lymph node involvement	Blank(s)	33	4 or more regional lymph nodes removed	None; diagnosed at autopsy	No radiation and/or cancer-directed surgery	Surgery performed	None	Blank(s)	Blank(s)	Blank(s)	Blank(s)	Blank(s)	Blank(s)	Blank(s)	Blank(s)	Blank(s)	Blank(s)	Blank(s)	Blank(s)
102	84	1921	2005	Female	White	C34.1-Upper lobe, lung	8013/3: Large cell neuroendocrine carcinoma	Unknown	8.3 Carcinoma of trachea,bronchus, and lung	Unclassified	XI(f) Other and unspecified carcinomas	Left - origin of primary	Positive histology	Blank(s)	IV	Blank(s)	Blank(s)	Blank(s)	Blank(s)	Blank(s)	T2	N0	M1	Blank(s)	Blank(s)	Blank(s)	D	D	Distant	Blank(s)	Blank(s)	0	1 to 3 regional lymph nodes removed	None; diagnosed at autopsy	No radiation and/or cancer-directed surgery	Recommended but not performed, unknown reason	None	Blank(s)	Blank(s)	Blank(s)	Blank(s)	Blank(s)	34	100	0	30	988	Blank(s)	Blank(s)
103	81	1925	2007	Male	White	C34.1-Upper lobe, lung	8013/3: Large cell neuroendocrine carcinoma	Poorly differentiated; Grade III	8.3 Carcinoma of trachea,bronchus, and lung	Unclassified	XI(f) Other and unspecified carcinomas	Left - origin of primary	Positive histology	Blank(s)	IIB	Blank(s)	Blank(s)	Blank(s)	Blank(s)	Blank(s)	T2	N1	M0	Blank(s)	Blank(s)	Blank(s)	RN	RN	Regional	Blank(s)	Blank(s)	33	4 or more regional lymph nodes removed	None; diagnosed at autopsy	No radiation and/or cancer-directed surgery	Surgery performed	None	Blank(s)	Blank(s)	Blank(s)	Blank(s)	Blank(s)	60	100	100	0	988	Blank(s)	Blank(s)
104	73	1933	2007	Male	White	C34.9-Lung, NOS	8013/3: Large cell neuroendocrine carcinoma	Unknown	8.3 Carcinoma of trachea,bronchus, and lung	Unclassified	XI(f) Other and unspecified carcinomas	Left - origin of primary	Positive histology	Blank(s)	IIIA	Blank(s)	Blank(s)	Blank(s)	Blank(s)	Blank(s)	T2	N2	M0	Blank(s)	Blank(s)	Blank(s)	RN	RN	Regional	Blank(s)	Blank(s)	0	None	None; diagnosed at autopsy	No radiation and/or cancer-directed surgery	Not recommended, contraindicated due to other cond; autopsy only (1973-2002)	Beam radiation	Blank(s)	Blank(s)	Blank(s)	Blank(s)	Blank(s)	40	200	200	0	988	Blank(s)	Blank(s)
105	77	1925	2002	Female	White	C34.1-Upper lobe, lung	8013/3: Large cell neuroendocrine carcinoma	Poorly differentiated; Grade III	8.3 Carcinoma of trachea,bronchus, and lung	Unclassified	XI(f) Other and unspecified carcinomas	Left - origin of primary	Positive histology	Blank(s)	Blank(s)	31	31	Blank(s)	Blank(s)	Blank(s)	Blank(s)	Blank(s)	Blank(s)	T3	N0	M0	Blank(s)	Blank(s)	Regional	Regional by direct extension only	Blank(s)	22	Blank(s)	Blank(s)	No radiation and/or cancer-directed surgery	Surgery performed	None	1	2	0	Blank(s)	Blank(s)	Blank(s)	Blank(s)	Blank(s)	Blank(s)	Blank(s)	Blank(s)	Blank(s)
106	83	1930	2013	Female	White	C34.3-Lower lobe, lung	8013/3: Large cell neuroendocrine carcinoma	Unknown	8.3 Carcinoma of trachea,bronchus, and lung	Unclassified	XI(f) Other and unspecified carcinomas	Right - origin of primary	Positive histology	IV	IV	Blank(s)	Blank(s)	T4	N3	M1b	T4	N3	M1	Blank(s)	Blank(s)	Blank(s)	D	D	Distant	Blank(s)	Blank(s)	0	None	Non-primary surgical procedure to distant lymph node(s)	No radiation and/or cancer-directed surgery	Not recommended	None	Blank(s)	Blank(s)	Blank(s)	Blank(s)	Blank(s)	54	700	600	30	10	998	Blank(s)
107	73	1936	2010	Female	White	C34.3-Lower lobe, lung	8013/3: Large cell neuroendocrine carcinoma	Unknown	8.3 Carcinoma of trachea,bronchus, and lung	Unclassified	XI(f) Other and unspecified carcinomas	Left - origin of primary	Positive histology	IV	IV	Blank(s)	Blank(s)	T3	N2	M1b	T3	N2	M1	Blank(s)	Blank(s)	Blank(s)	D	D	Distant	Blank(s)	Blank(s)	0	None	None; diagnosed at autopsy	No radiation and/or cancer-directed surgery	Not recommended	Beam radiation	Blank(s)	Blank(s)	Blank(s)	Blank(s)	Blank(s)	105	570	200	51	0	998	Blank(s)
108	72	1932	2004	Male	White	C34.3-Lower lobe, lung	8013/3: Large cell neuroendocrine carcinoma	Poorly differentiated; Grade III	8.3 Carcinoma of trachea,bronchus, and lung	Unclassified	XI(f) Other and unspecified carcinomas	Left - origin of primary	Positive histology	Blank(s)	IIIA	Blank(s)	Blank(s)	Blank(s)	Blank(s)	Blank(s)	T2	N2	M0	Blank(s)	Blank(s)	Blank(s)	RN	RN	Regional	Blank(s)	Blank(s)	0	None	None; diagnosed at autopsy	No radiation and/or cancer-directed surgery	Not recommended	Beam radiation	Blank(s)	Blank(s)	Blank(s)	Blank(s)	Blank(s)	120	300	200	0	988	Blank(s)	Blank(s)
109	75	1935	2011	Female	White	C34.1-Upper lobe, lung	8013/3: Large cell neuroendocrine carcinoma	Unknown	8.3 Carcinoma of trachea,bronchus, and lung	Unclassified	XI(f) Other and unspecified carcinomas	Right - origin of primary	Positive histology	III	UNK Stage	Blank(s)	Blank(s)	TX	N2	M0	TX	N2	MX	Blank(s)	Blank(s)	Blank(s)	RN	RN	Regional	Blank(s)	Blank(s)	0	Biopsy or aspiration of regional lymph node, NOS	None; diagnosed at autopsy	No radiation and/or cancer-directed surgery	Not recommended	None	Blank(s)	Blank(s)	Blank(s)	Blank(s)	Blank(s)	999	999	200	99	0	998	Blank(s)
110	72	1940	2012	Female	White	C34.1-Upper lobe, lung	8013/3: Large cell neuroendocrine carcinoma	Moderately differentiated; Grade II	8.3 Carcinoma of trachea,bronchus, and lung	Unclassified	XI(f) Other and unspecified carcinomas	Right - origin of primary	Positive histology	III	IIIA	Blank(s)	Blank(s)	TX	N2	M0	TX	N2	M0	Blank(s)	Blank(s)	Blank(s)	RN	RN	Regional	Blank(s)	Blank(s)	0	None	None; diagnosed at autopsy	No radiation and/or cancer-directed surgery	Not recommended	Radiation, NOS method or source not specified	Blank(s)	Blank(s)	Blank(s)	Blank(s)	Blank(s)	999	100	200	0	0	999	Blank(s)
111	83	1929	2012	Male	White	C34.1-Upper lobe, lung	8013/3: Large cell neuroendocrine carcinoma	Poorly differentiated; Grade III	8.3 Carcinoma of trachea,bronchus, and lung	Unclassified	XI(f) Other and unspecified carcinomas	Left - origin of primary	Positive histology	IA	IA	Blank(s)	Blank(s)	T1b	N0	M0	T1	N0	M0	Blank(s)	Blank(s)	Blank(s)	L	L	Localized	Blank(s)	Blank(s)	22	1 to 3 regional lymph nodes removed	None; diagnosed at autopsy	No radiation and/or cancer-directed surgery	Surgery performed	None	Blank(s)	Blank(s)	Blank(s)	Blank(s)	Blank(s)	25	100	0	0	0	0	Blank(s)
112	67	1942	2009	Male	Black	C34.1-Upper lobe, lung	8013/3: Large cell neuroendocrine carcinoma	Unknown	8.3 Carcinoma of trachea,bronchus, and lung	Unclassified	XI(f) Other and unspecified carcinomas	Right - origin of primary	Positive histology	Blank(s)	IB	Blank(s)	Blank(s)	Blank(s)	Blank(s)	Blank(s)	T2	N0	M0	Blank(s)	Blank(s)	Blank(s)	RE	RE	Regional	Blank(s)	Blank(s)	33	4 or more regional lymph nodes removed	None; diagnosed at autopsy	No radiation and/or cancer-directed surgery	Surgery performed	None	Blank(s)	Blank(s)	Blank(s)	Blank(s)	Blank(s)	48	410	0	0	0	Blank(s)	Blank(s)
113	77	1935	2013	Female	White	C34.3-Lower lobe, lung	8013/3: Large cell neuroendocrine carcinoma	Poorly differentiated; Grade III	8.3 Carcinoma of trachea,bronchus, and lung	Unclassified	XI(f) Other and unspecified carcinomas	Right - origin of primary	Positive histology	IA	IA	Blank(s)	Blank(s)	T1a	N0	M0	T1	N0	M0	Blank(s)	Blank(s)	Blank(s)	L	L	Localized	Blank(s)	Blank(s)	22	None	None; diagnosed at autopsy	No radiation and/or cancer-directed surgery	Surgery performed	None	Blank(s)	Blank(s)	Blank(s)	Blank(s)	Blank(s)	8	100	0	0	0	0	Blank(s)
114	67	1940	2008	Male	Black	C34.1-Upper lobe, lung	8013/3: Large cell neuroendocrine carcinoma	Poorly differentiated; Grade III	8.3 Carcinoma of trachea,bronchus, and lung	Unclassified	XI(f) Other and unspecified carcinomas	Right - origin of primary	Positive histology	Blank(s)	IIB	Blank(s)	Blank(s)	Blank(s)	Blank(s)	Blank(s)	T3	N0	M0	Blank(s)	Blank(s)	Blank(s)	D	D	Distant	Blank(s)	Blank(s)	30	4 or more regional lymph nodes removed	None; diagnosed at autopsy	Radiation after surgery	Surgery performed	Beam radiation	Blank(s)	Blank(s)	Blank(s)	Blank(s)	Blank(s)	62	730	0	0	988	Blank(s)	Blank(s)
115	82	1918	2001	Male	White	C34.2-Middle lobe, lung	8013/3: Large cell neuroendocrine carcinoma	Undifferentiated; anaplastic; Grade IV	8.3 Carcinoma of trachea,bronchus, and lung	Unclassified	XI(f) Other and unspecified carcinomas	Right - origin of primary	Positive histology	Blank(s)	Blank(s)	10	10	Blank(s)	Blank(s)	Blank(s)	Blank(s)	Blank(s)	Blank(s)	T2	N0	M0	Blank(s)	Blank(s)	Localized	Localized only	Blank(s)	30	Blank(s)	Blank(s)	No radiation and/or cancer-directed surgery	Surgery performed	None	5	19	0	Blank(s)	Blank(s)	Blank(s)	Blank(s)	Blank(s)	Blank(s)	Blank(s)	Blank(s)	Blank(s)
116	64	1937	2001	Male	White	C34.1-Upper lobe, lung	8013/3: Large cell neuroendocrine carcinoma	Unknown	8.3 Carcinoma of trachea,bronchus, and lung	Unclassified	XI(f) Other and unspecified carcinomas	Left - origin of primary	Positive histology	Blank(s)	Blank(s)	10	10	Blank(s)	Blank(s)	Blank(s)	Blank(s)	Blank(s)	Blank(s)	T1	N0	M0	Blank(s)	Blank(s)	Localized	Localized only	Blank(s)	30	Blank(s)	Blank(s)	No radiation and/or cancer-directed surgery	Surgery performed	None	4	17	0	Blank(s)	Blank(s)	Blank(s)	Blank(s)	Blank(s)	Blank(s)	Blank(s)	Blank(s)	Blank(s)
117	49	1951	2001	Female	White	C34.1-Upper lobe, lung	8013/3: Large cell neuroendocrine carcinoma	Unknown	8.3 Carcinoma of trachea,bronchus, and lung	Unclassified	XI(f) Other and unspecified carcinomas	Right - origin of primary	Positive histology	Blank(s)	Blank(s)	40	40	Blank(s)	Blank(s)	Blank(s)	Blank(s)	Blank(s)	Blank(s)	TX	NX	M1	Blank(s)	Blank(s)	Distant	Distant site(s)/node(s) involved	Blank(s)	0	Blank(s)	Blank(s)	No radiation and/or cancer-directed surgery	Not recommended	Beam radiation	0	0	0	Blank(s)	Blank(s)	Blank(s)	Blank(s)	Blank(s)	Blank(s)	Blank(s)	Blank(s)	Blank(s)
118	80	1920	2001	Female	White	C34.1-Upper lobe, lung	8013/3: Large cell neuroendocrine carcinoma	Undifferentiated; anaplastic; Grade IV	8.3 Carcinoma of trachea,bronchus, and lung	Unclassified	XI(f) Other and unspecified carcinomas	Left - origin of primary	Positive histology	Blank(s)	Blank(s)	90	20	Blank(s)	Blank(s)	Blank(s)	Blank(s)	Blank(s)	Blank(s)	TXc	N1	M0	Blank(s)	Blank(s)	Regional	Regional lymph nodes involved only	Blank(s)	30	Blank(s)	Blank(s)	No radiation and/or cancer-directed surgery	Surgery performed	None	4	5	0	Blank(s)	Blank(s)	Blank(s)	Blank(s)	Blank(s)	Blank(s)	Blank(s)	Blank(s)	Blank(s)
119	69	1933	2002	Female	Black	C34.3-Lower lobe, lung	8013/3: Large cell neuroendocrine carcinoma	Poorly differentiated; Grade III	8.3 Carcinoma of trachea,bronchus, and lung	Unclassified	XI(f) Other and unspecified carcinomas	Right - origin of primary	Positive histology	Blank(s)	Blank(s)	40	40	Blank(s)	Blank(s)	Blank(s)	Blank(s)	Blank(s)	Blank(s)	TX	N2	M1	Blank(s)	Blank(s)	Distant	Distant site(s)/node(s) involved	Blank(s)	21	Blank(s)	Blank(s)	No radiation and/or cancer-directed surgery	Surgery performed	None	0	0	0	Blank(s)	Blank(s)	Blank(s)	Blank(s)	Blank(s)	Blank(s)	Blank(s)	Blank(s)	Blank(s)
120	83	1925	2009	Female	White	C34.1-Upper lobe, lung	8013/3: Large cell neuroendocrine carcinoma	Unknown	8.3 Carcinoma of trachea,bronchus, and lung	Unclassified	XI(f) Other and unspecified carcinomas	Left - origin of primary	Positive histology	Blank(s)	IIIA	Blank(s)	Blank(s)	Blank(s)	Blank(s)	Blank(s)	T2	N2	M0	Blank(s)	Blank(s)	Blank(s)	RE+RN	RE+RN	Regional	Blank(s)	Blank(s)	0	None	None; diagnosed at autopsy	No radiation and/or cancer-directed surgery	Not recommended	Beam radiation	Blank(s)	Blank(s)	Blank(s)	Blank(s)	Blank(s)	36	450	200	0	0	Blank(s)	Blank(s)
121	74	1927	2002	Female	White	C34.1-Upper lobe, lung	8013/3: Large cell neuroendocrine carcinoma	Unknown	8.3 Carcinoma of trachea,bronchus, and lung	Unclassified	XI(f) Other and unspecified carcinomas	Right - origin of primary	Positive histology	Blank(s)	Blank(s)	32	32	Blank(s)	Blank(s)	Blank(s)	Blank(s)	Blank(s)	Blank(s)	T4	N2	M0	Blank(s)	Blank(s)	Distant	Distant site(s)/node(s) involved	Blank(s)	55	Blank(s)	Blank(s)	No radiation and/or cancer-directed surgery	Surgery performed	None	0	0	0	Blank(s)	Blank(s)	Blank(s)	Blank(s)	Blank(s)	Blank(s)	Blank(s)	Blank(s)	Blank(s)
122	76	1926	2002	Male	White	C34.1-Upper lobe, lung	8013/3: Large cell neuroendocrine carcinoma	Unknown	8.3 Carcinoma of trachea,bronchus, and lung	Unclassified	XI(f) Other and unspecified carcinomas	Left - origin of primary	Positive histology	Blank(s)	Blank(s)	10	10	Blank(s)	Blank(s)	Blank(s)	Blank(s)	Blank(s)	Blank(s)	T2	N0	M0	Blank(s)	Blank(s)	Regional	Regional by direct extension only	Blank(s)	0	Blank(s)	Blank(s)	No radiation and/or cancer-directed surgery	Not recommended	Beam radiation	0	0	0	Blank(s)	Blank(s)	Blank(s)	Blank(s)	Blank(s)	Blank(s)	Blank(s)	Blank(s)	Blank(s)
123	83	1925	2008	Male	White	C34.1-Upper lobe, lung	8013/3: Large cell neuroendocrine carcinoma	Poorly differentiated; Grade III	8.3 Carcinoma of trachea,bronchus, and lung	Unclassified	XI(f) Other and unspecified carcinomas	Right - origin of primary	Positive histology	Blank(s)	IV	Blank(s)	Blank(s)	Blank(s)	Blank(s)	Blank(s)	T2	N0	M1	Blank(s)	Blank(s)	Blank(s)	D	D	Distant	Blank(s)	Blank(s)	0	None	None; diagnosed at autopsy	No radiation and/or cancer-directed surgery	Recommended but not performed, unknown reason	None	Blank(s)	Blank(s)	Blank(s)	Blank(s)	Blank(s)	54	200	0	40	988	Blank(s)	Blank(s)
124	88	1917	2006	Female	White	C34.1-Upper lobe, lung	8013/3: Large cell neuroendocrine carcinoma	Poorly differentiated; Grade III	8.3 Carcinoma of trachea,bronchus, and lung	Unclassified	XI(f) Other and unspecified carcinomas	Right - origin of primary	Positive histology	Blank(s)	IV	Blank(s)	Blank(s)	Blank(s)	Blank(s)	Blank(s)	T2	N0	M1	Blank(s)	Blank(s)	Blank(s)	L	D	Distant	Blank(s)	Blank(s)	0	None	None; diagnosed at autopsy	No radiation and/or cancer-directed surgery	Not recommended	Beam radiation	Blank(s)	Blank(s)	Blank(s)	Blank(s)	Blank(s)	40	300	0	35	988	Blank(s)	Blank(s)
125	55	1946	2001	Female	Black	C34.1-Upper lobe, lung	8013/3: Large cell neuroendocrine carcinoma	Unknown	8.3 Carcinoma of trachea,bronchus, and lung	Unclassified	XI(f) Other and unspecified carcinomas	Left - origin of primary	Positive histology	Blank(s)	Blank(s)	20	20	Blank(s)	Blank(s)	Blank(s)	Blank(s)	Blank(s)	Blank(s)	T2	N1	M0	Blank(s)	Blank(s)	Regional	Regional lymph nodes involved only	Blank(s)	56	Blank(s)	Blank(s)	No radiation and/or cancer-directed surgery	Surgery performed	Recommended, unknown if administered	1	98	0	Blank(s)	Blank(s)	Blank(s)	Blank(s)	Blank(s)	Blank(s)	Blank(s)	Blank(s)	Blank(s)
126	70	1932	2002	Female	White	C34.1-Upper lobe, lung	8013/3: Large cell neuroendocrine carcinoma	Unknown	8.3 Carcinoma of trachea,bronchus, and lung	Unclassified	XI(f) Other and unspecified carcinomas	Right - origin of primary	Positive histology	Blank(s)	Blank(s)	40	40	Blank(s)	Blank(s)	Blank(s)	Blank(s)	Blank(s)	Blank(s)	TX	N0	M1	Blank(s)	Blank(s)	Distant	Distant site(s)/node(s) involved	Blank(s)	30	Blank(s)	Blank(s)	Radiation after surgery	Surgery performed	Beam radiation	4	28	6	Blank(s)	Blank(s)	Blank(s)	Blank(s)	Blank(s)	Blank(s)	Blank(s)	Blank(s)	Blank(s)
127	82	1920	2002	Male	White	C34.1-Upper lobe, lung	8013/3: Large cell neuroendocrine carcinoma	Unknown	8.3 Carcinoma of trachea,bronchus, and lung	Unclassified	XI(f) Other and unspecified carcinomas	Left - origin of primary	Positive histology	Blank(s)	Blank(s)	90	90	Blank(s)	Blank(s)	Blank(s)	Blank(s)	Blank(s)	Blank(s)	TX	NX	MX	Blank(s)	Blank(s)	Unknown/unstaged	Unknown/unstaged/unspecified/DCO	Blank(s)	0	Blank(s)	Blank(s)	No radiation and/or cancer-directed surgery	Not recommended	None	0	0	0	Blank(s)	Blank(s)	Blank(s)	Blank(s)	Blank(s)	Blank(s)	Blank(s)	Blank(s)	Blank(s)
128	44	1958	2002	Female	White	C34.3-Lower lobe, lung	8013/3: Large cell neuroendocrine carcinoma	Unknown	8.3 Carcinoma of trachea,bronchus, and lung	Unclassified	XI(f) Other and unspecified carcinomas	Right - origin of primary	Positive histology	Blank(s)	Blank(s)	20	20	Blank(s)	Blank(s)	Blank(s)	Blank(s)	Blank(s)	Blank(s)	T1	N1	M0	Blank(s)	Blank(s)	Regional	Regional lymph nodes involved only	Blank(s)	30	Blank(s)	Blank(s)	No radiation and/or cancer-directed surgery	Surgery performed	None	2	8	0	Blank(s)	Blank(s)	Blank(s)	Blank(s)	Blank(s)	Blank(s)	Blank(s)	Blank(s)	Blank(s)
129	65	1938	2003	Female	White	C34.9-Lung, NOS	8013/3: Large cell neuroendocrine carcinoma	Undifferentiated; anaplastic; Grade IV	8.3 Carcinoma of trachea,bronchus, and lung	Unclassified	XI(f) Other and unspecified carcinomas	Right - origin of primary	Positive exfoliative cytology, no positive histology	Blank(s)	Blank(s)	32	32	Blank(s)	Blank(s)	Blank(s)	Blank(s)	Blank(s)	Blank(s)	T4	NX	M0	Blank(s)	Blank(s)	Distant	Distant site(s)/node(s) involved	Blank(s)	0	None	None; diagnosed at autopsy	No radiation and/or cancer-directed surgery	Recommended but not performed, unknown reason	None	Blank(s)	Blank(s)	Blank(s)	Blank(s)	Blank(s)	Blank(s)	Blank(s)	Blank(s)	Blank(s)	Blank(s)	Blank(s)	Blank(s)
130	67	1935	2003	Male	White	C34.1-Upper lobe, lung	8013/3: Large cell neuroendocrine carcinoma	Poorly differentiated; Grade III	8.3 Carcinoma of trachea,bronchus, and lung	Unclassified	XI(f) Other and unspecified carcinomas	Right - origin of primary	Positive histology	Blank(s)	Blank(s)	10	10	Blank(s)	Blank(s)	Blank(s)	Blank(s)	Blank(s)	Blank(s)	T1	N0	M0	Blank(s)	Blank(s)	Localized	Localized only	Blank(s)	33	4 or more regional lymph nodes removed	None; diagnosed at autopsy	No radiation and/or cancer-directed surgery	Surgery performed	None	Blank(s)	Blank(s)	Blank(s)	Blank(s)	Blank(s)	Blank(s)	Blank(s)	Blank(s)	Blank(s)	Blank(s)	Blank(s)	Blank(s)
131	67	1936	2003	Female	White	C34.1-Upper lobe, lung	8013/3: Large cell neuroendocrine carcinoma	Unknown	8.3 Carcinoma of trachea,bronchus, and lung	Unclassified	XI(f) Other and unspecified carcinomas	Right - origin of primary	Positive histology	Blank(s)	Blank(s)	31	31	Blank(s)	Blank(s)	Blank(s)	Blank(s)	Blank(s)	Blank(s)	T1	N2	M0	Blank(s)	Blank(s)	Regional	Regional lymph nodes involved only	Blank(s)	33	4 or more regional lymph nodes removed	None; diagnosed at autopsy	No radiation and/or cancer-directed surgery	Surgery performed	None	Blank(s)	Blank(s)	Blank(s)	Blank(s)	Blank(s)	Blank(s)	Blank(s)	Blank(s)	Blank(s)	Blank(s)	Blank(s)	Blank(s)
132	78	1925	2003	Female	White	C34.1-Upper lobe, lung	8013/3: Large cell neuroendocrine carcinoma	Unknown	8.3 Carcinoma of trachea,bronchus, and lung	Unclassified	XI(f) Other and unspecified carcinomas	Right - origin of primary	Positive histology	Blank(s)	Blank(s)	40	40	Blank(s)	Blank(s)	Blank(s)	Blank(s)	Blank(s)	Blank(s)	TX	NX	M1	Blank(s)	Blank(s)	Distant	Distant site(s)/node(s) involved	Blank(s)	0	None	None; diagnosed at autopsy	No radiation and/or cancer-directed surgery	Not recommended	Beam radiation	Blank(s)	Blank(s)	Blank(s)	Blank(s)	Blank(s)	Blank(s)	Blank(s)	Blank(s)	Blank(s)	Blank(s)	Blank(s)	Blank(s)
133	77	1935	2012	Male	White	C34.3-Lower lobe, lung	8013/3: Large cell neuroendocrine carcinoma	Unknown	8.3 Carcinoma of trachea,bronchus, and lung	Unclassified	XI(f) Other and unspecified carcinomas	Right - origin of primary	Positive histology	IIB	IIB	Blank(s)	Blank(s)	T3	N0	M0	T3	N0	M0	Blank(s)	Blank(s)	Blank(s)	D	RE	Regional	Blank(s)	Blank(s)	21	1 to 3 regional lymph nodes removed	None; diagnosed at autopsy	No radiation and/or cancer-directed surgery	Surgery performed	None	Blank(s)	Blank(s)	Blank(s)	Blank(s)	Blank(s)	40	600	0	0	0	10	Blank(s)
134	66	1936	2003	Female	White	C34.3-Lower lobe, lung	8013/3: Large cell neuroendocrine carcinoma	Undifferentiated; anaplastic; Grade IV	8.3 Carcinoma of trachea,bronchus, and lung	Unclassified	XI(f) Other and unspecified carcinomas	Right - origin of primary	Positive histology	Blank(s)	Blank(s)	40	40	Blank(s)	Blank(s)	Blank(s)	Blank(s)	Blank(s)	Blank(s)	TX	NX	M1	Blank(s)	Blank(s)	Distant	Distant site(s)/node(s) involved	Blank(s)	0	None	Non-primary surgical procedure to distant lymph node(s)	Radiation after surgery	Recommended but not performed, unknown reason	Beam radiation	Blank(s)	Blank(s)	Blank(s)	Blank(s)	Blank(s)	Blank(s)	Blank(s)	Blank(s)	Blank(s)	Blank(s)	Blank(s)	Blank(s)
135	72	1936	2008	Male	White	C34.1-Upper lobe, lung	8013/3: Large cell neuroendocrine carcinoma	Poorly differentiated; Grade III	8.3 Carcinoma of trachea,bronchus, and lung	Unclassified	XI(f) Other and unspecified carcinomas	Right - origin of primary	Positive histology	Blank(s)	IB	Blank(s)	Blank(s)	Blank(s)	Blank(s)	Blank(s)	T2	N0	M0	Blank(s)	Blank(s)	Blank(s)	L	L	Localized	Blank(s)	Blank(s)	21	1 to 3 regional lymph nodes removed	None; diagnosed at autopsy	No radiation and/or cancer-directed surgery	Surgery performed	None	Blank(s)	Blank(s)	Blank(s)	Blank(s)	Blank(s)	20	200	0	0	988	Blank(s)	Blank(s)
136	66	1940	2007	Female	White	C34.1-Upper lobe, lung	8013/3: Large cell neuroendocrine carcinoma	Poorly differentiated; Grade III	8.3 Carcinoma of trachea,bronchus, and lung	Unclassified	XI(f) Other and unspecified carcinomas	Left - origin of primary	Positive histology	Blank(s)	IB	Blank(s)	Blank(s)	Blank(s)	Blank(s)	Blank(s)	T2	N0	M0	Blank(s)	Blank(s)	Blank(s)	L	L	Localized	Blank(s)	Blank(s)	0	1 to 3 regional lymph nodes removed	None; diagnosed at autopsy	Radiation after surgery	Not recommended, contraindicated due to other cond; autopsy only (1973-2002)	Beam radiation	Blank(s)	Blank(s)	Blank(s)	Blank(s)	Blank(s)	40	300	0	0	988	Blank(s)	Blank(s)
137	66	1940	2007	Female	White	C34.1-Upper lobe, lung	8013/3: Large cell neuroendocrine carcinoma	Poorly differentiated; Grade III	8.3 Carcinoma of trachea,bronchus, and lung	Unclassified	XI(f) Other and unspecified carcinomas	Right - origin of primary	Positive histology	Blank(s)	IIB	Blank(s)	Blank(s)	Blank(s)	Blank(s)	Blank(s)	T3	N0	M0	Blank(s)	Blank(s)	Blank(s)	D	RE	Regional	Blank(s)	Blank(s)	0	1 to 3 regional lymph nodes removed	None; diagnosed at autopsy	Radiation after surgery	Not recommended, contraindicated due to other cond; autopsy only (1973-2002)	Beam radiation	Blank(s)	Blank(s)	Blank(s)	Blank(s)	Blank(s)	50	600	0	0	988	Blank(s)	Blank(s)
138	81	1923	2004	Male	Black	C34.1-Upper lobe, lung	8013/3: Large cell neuroendocrine carcinoma	Unknown	8.3 Carcinoma of trachea,bronchus, and lung	Unclassified	XI(f) Other and unspecified carcinomas	Right - origin of primary	Positive histology	Blank(s)	IV	Blank(s)	Blank(s)	Blank(s)	Blank(s)	Blank(s)	TX	N2	M1	Blank(s)	Blank(s)	Blank(s)	D	D	Distant	Blank(s)	Blank(s)	0	None	None; diagnosed at autopsy	No radiation and/or cancer-directed surgery	Not recommended	Beam radiation	Blank(s)	Blank(s)	Blank(s)	Blank(s)	Blank(s)	999	999	200	40	988	Blank(s)	Blank(s)
139	57	1946	2004	Female	White	C34.1-Upper lobe, lung	8013/3: Large cell neuroendocrine carcinoma	Poorly differentiated; Grade III	8.3 Carcinoma of trachea,bronchus, and lung	Unclassified	XI(f) Other and unspecified carcinomas	Right - origin of primary	Positive histology	Blank(s)	IA	Blank(s)	Blank(s)	Blank(s)	Blank(s)	Blank(s)	T1	N0	M0	Blank(s)	Blank(s)	Blank(s)	L	L	Localized	Blank(s)	Blank(s)	30	1 to 3 regional lymph nodes removed	None; diagnosed at autopsy	No radiation and/or cancer-directed surgery	Surgery performed	None	Blank(s)	Blank(s)	Blank(s)	Blank(s)	Blank(s)	15	100	0	0	988	Blank(s)	Blank(s)
140	56	1950	2007	Female	White	C34.1-Upper lobe, lung	8013/3: Large cell neuroendocrine carcinoma	Undifferentiated; anaplastic; Grade IV	8.3 Carcinoma of trachea,bronchus, and lung	Unclassified	XI(f) Other and unspecified carcinomas	Left - origin of primary	Positive histology	Blank(s)	IA	Blank(s)	Blank(s)	Blank(s)	Blank(s)	Blank(s)	T1	N0	M0	Blank(s)	Blank(s)	Blank(s)	L	L	Localized	Blank(s)	Blank(s)	33	4 or more regional lymph nodes removed	None; diagnosed at autopsy	No radiation and/or cancer-directed surgery	Surgery performed	None	Blank(s)	Blank(s)	Blank(s)	Blank(s)	Blank(s)	28	100	0	0	988	Blank(s)	Blank(s)
141	74	1932	2007	Female	White	C34.1-Upper lobe, lung	8013/3: Large cell neuroendocrine carcinoma	Poorly differentiated; Grade III	8.3 Carcinoma of trachea,bronchus, and lung	Unclassified	XI(f) Other and unspecified carcinomas	Right - origin of primary	Positive histology	Blank(s)	IIIB	Blank(s)	Blank(s)	Blank(s)	Blank(s)	Blank(s)	T4	N1	M0	Blank(s)	Blank(s)	Blank(s)	RN	RE+RN	Regional	Blank(s)	Blank(s)	33	4 or more regional lymph nodes removed	None; diagnosed at autopsy	No radiation and/or cancer-directed surgery	Surgery performed	None	Blank(s)	Blank(s)	Blank(s)	Blank(s)	Blank(s)	25	650	100	0	988	Blank(s)	Blank(s)
142	63	1941	2004	Female	White	C34.2-Middle lobe, lung	8013/3: Large cell neuroendocrine carcinoma	Unknown	8.3 Carcinoma of trachea,bronchus, and lung	Unclassified	XI(f) Other and unspecified carcinomas	Right - origin of primary	Positive histology	Blank(s)	IA	Blank(s)	Blank(s)	Blank(s)	Blank(s)	Blank(s)	T1	N0	M0	Blank(s)	Blank(s)	Blank(s)	L	L	Localized	Blank(s)	Blank(s)	30	1 to 3 regional lymph nodes removed	None; diagnosed at autopsy	No radiation and/or cancer-directed surgery	Surgery performed	None	Blank(s)	Blank(s)	Blank(s)	Blank(s)	Blank(s)	20	100	0	0	988	Blank(s)	Blank(s)
143	57	1947	2004	Male	White	C34.1-Upper lobe, lung	8013/3: Large cell neuroendocrine carcinoma	Poorly differentiated; Grade III	8.3 Carcinoma of trachea,bronchus, and lung	Unclassified	XI(f) Other and unspecified carcinomas	Right - origin of primary	Positive histology	Blank(s)	IA	Blank(s)	Blank(s)	Blank(s)	Blank(s)	Blank(s)	T1	N0	M0	Blank(s)	Blank(s)	Blank(s)	L	L	Localized	Blank(s)	Blank(s)	33	4 or more regional lymph nodes removed	None; diagnosed at autopsy	No radiation and/or cancer-directed surgery	Surgery performed	None	Blank(s)	Blank(s)	Blank(s)	Blank(s)	Blank(s)	15	100	0	0	988	Blank(s)	Blank(s)
144	61	1949	2010	Male	White	C34.1-Upper lobe, lung	8013/3: Large cell neuroendocrine carcinoma	Unknown	8.3 Carcinoma of trachea,bronchus, and lung	Unclassified	XI(f) Other and unspecified carcinomas	Right - origin of primary	Positive histology	IV	IV	Blank(s)	Blank(s)	T3	NX	M1b	T4	NX	M1	Blank(s)	Blank(s)	Blank(s)	D	D	Distant	Blank(s)	Blank(s)	0	None	Non-primary surgical procedure to distant site	Radiation after surgery	Not recommended	Beam radiation	Blank(s)	Blank(s)	Blank(s)	Blank(s)	Blank(s)	25	400	999	40	10	998	Blank(s)
145	81	1924	2005	Male	White	C34.3-Lower lobe, lung	8013/3: Large cell neuroendocrine carcinoma	Unknown	8.3 Carcinoma of trachea,bronchus, and lung	Unclassified	XI(f) Other and unspecified carcinomas	Left - origin of primary	Positive exfoliative cytology, no positive histology	Blank(s)	IIIA	Blank(s)	Blank(s)	Blank(s)	Blank(s)	Blank(s)	T2	N2	M0	Blank(s)	Blank(s)	Blank(s)	RE+RN	RE+RN	Regional	Blank(s)	Blank(s)	0	None	None; diagnosed at autopsy	No radiation and/or cancer-directed surgery	Recommended but not performed, unknown reason	Beam radiation	Blank(s)	Blank(s)	Blank(s)	Blank(s)	Blank(s)	999	400	200	0	988	Blank(s)	Blank(s)
146	75	1929	2005	Male	White	C34.9-Lung, NOS	8013/3: Large cell neuroendocrine carcinoma	Unknown	8.3 Carcinoma of trachea,bronchus, and lung	Unclassified	XI(f) Other and unspecified carcinomas	Paired site, but no information concerning laterality	Positive histology	Blank(s)	IV	Blank(s)	Blank(s)	Blank(s)	Blank(s)	Blank(s)	T0	N0	M1	Blank(s)	Blank(s)	Blank(s)	D	D	Distant	Blank(s)	Blank(s)	0	None	None; diagnosed at autopsy	No radiation and/or cancer-directed surgery	Recommended but not performed, unknown reason	Beam radiation	Blank(s)	Blank(s)	Blank(s)	Blank(s)	Blank(s)	0	950	0	40	988	Blank(s)	Blank(s)
147	67	1937	2005	Female	White	C34.3-Lower lobe, lung	8013/3: Large cell neuroendocrine carcinoma	Poorly differentiated; Grade III	8.3 Carcinoma of trachea,bronchus, and lung	Unclassified	XI(f) Other and unspecified carcinomas	Left - origin of primary	Positive histology	Blank(s)	IV	Blank(s)	Blank(s)	Blank(s)	Blank(s)	Blank(s)	T1	N2	M1	Blank(s)	Blank(s)	Blank(s)	D	D	Distant	Blank(s)	Blank(s)	33	4 or more regional lymph nodes removed	None; diagnosed at autopsy	Radiation prior to surgery	Surgery performed	Beam radiation	Blank(s)	Blank(s)	Blank(s)	Blank(s)	Blank(s)	24	110	200	40	988	Blank(s)	Blank(s)
148	76	1928	2005	Female	White	C34.3-Lower lobe, lung	8013/3: Large cell neuroendocrine carcinoma	Poorly differentiated; Grade III	8.3 Carcinoma of trachea,bronchus, and lung	Unclassified	XI(f) Other and unspecified carcinomas	Right - origin of primary	Positive histology	Blank(s)	IA	Blank(s)	Blank(s)	Blank(s)	Blank(s)	Blank(s)	T1	N0	M0	Blank(s)	Blank(s)	Blank(s)	L	L	Localized	Blank(s)	Blank(s)	21	None	None; diagnosed at autopsy	No radiation and/or cancer-directed surgery	Surgery performed	None	Blank(s)	Blank(s)	Blank(s)	Blank(s)	Blank(s)	18	100	0	0	988	Blank(s)	Blank(s)
149	74	1931	2005	Male	White	C34.1-Upper lobe, lung	8013/3: Large cell neuroendocrine carcinoma	Poorly differentiated; Grade III	8.3 Carcinoma of trachea,bronchus, and lung	Unclassified	XI(f) Other and unspecified carcinomas	Right - origin of primary	Positive histology	Blank(s)	IV	Blank(s)	Blank(s)	Blank(s)	Blank(s)	Blank(s)	T1	N0	M1	Blank(s)	Blank(s)	Blank(s)	D	D	Distant	Blank(s)	Blank(s)	21	None	None; diagnosed at autopsy	Radiation after surgery	Surgery performed	Beam radiation	Blank(s)	Blank(s)	Blank(s)	Blank(s)	Blank(s)	13	100	0	40	988	Blank(s)	Blank(s)
150	65	1939	2005	Male	White	C34.3-Lower lobe, lung	8013/3: Large cell neuroendocrine carcinoma	Poorly differentiated; Grade III	8.3 Carcinoma of trachea,bronchus, and lung	Unclassified	XI(f) Other and unspecified carcinomas	Left - origin of primary	Positive histology	Blank(s)	IIIB	Blank(s)	Blank(s)	Blank(s)	Blank(s)	Blank(s)	T4	N0	M0	Blank(s)	Blank(s)	Blank(s)	RE	RE	Regional	Blank(s)	Blank(s)	22	4 or more regional lymph nodes removed	None; diagnosed at autopsy	No radiation and/or cancer-directed surgery	Surgery performed	None	Blank(s)	Blank(s)	Blank(s)	Blank(s)	Blank(s)	23	700	0	0	988	Blank(s)	Blank(s)
151	63	1943	2006	Female	White	C34.1-Upper lobe, lung	8013/3: Large cell neuroendocrine carcinoma	Moderately differentiated; Grade II	8.3 Carcinoma of trachea,bronchus, and lung	Unclassified	XI(f) Other and unspecified carcinomas	Left - origin of primary	Positive histology	Blank(s)	IIIA	Blank(s)	Blank(s)	Blank(s)	Blank(s)	Blank(s)	T2	N2	M0	Blank(s)	Blank(s)	Blank(s)	RE+RN	RE+RN	Regional	Blank(s)	Blank(s)	56	4 or more regional lymph nodes removed	None; diagnosed at autopsy	No radiation and/or cancer-directed surgery	Surgery performed	None	Blank(s)	Blank(s)	Blank(s)	Blank(s)	Blank(s)	58	450	200	0	988	Blank(s)	Blank(s)
152	55	1950	2006	Male	White	C34.1-Upper lobe, lung	8013/3: Large cell neuroendocrine carcinoma	Poorly differentiated; Grade III	8.3 Carcinoma of trachea,bronchus, and lung	Unclassified	XI(f) Other and unspecified carcinomas	Right - origin of primary	Positive histology	Blank(s)	IB	Blank(s)	Blank(s)	Blank(s)	Blank(s)	Blank(s)	T2	N0	M0	Blank(s)	Blank(s)	Blank(s)	RE	RE	Regional	Blank(s)	Blank(s)	46	4 or more regional lymph nodes removed	None; diagnosed at autopsy	No radiation and/or cancer-directed surgery	Surgery performed	None	Blank(s)	Blank(s)	Blank(s)	Blank(s)	Blank(s)	20	450	0	0	988	Blank(s)	Blank(s)
153	76	1930	2006	Female	White	C34.3-Lower lobe, lung	8013/3: Large cell neuroendocrine carcinoma	Unknown	8.3 Carcinoma of trachea,bronchus, and lung	Unclassified	XI(f) Other and unspecified carcinomas	Right - origin of primary	Positive histology	Blank(s)	OCCULT	Blank(s)	Blank(s)	Blank(s)	Blank(s)	Blank(s)	TX	N0	M0	Blank(s)	Blank(s)	Blank(s)	U	U	Unknown/unstaged	Blank(s)	Blank(s)	0	None	None; diagnosed at autopsy	No radiation and/or cancer-directed surgery	Not recommended	Beam radiation	Blank(s)	Blank(s)	Blank(s)	Blank(s)	Blank(s)	27	999	0	0	988	Blank(s)	Blank(s)
154	80	1926	2006	Male	White	C34.1-Upper lobe, lung	8013/3: Large cell neuroendocrine carcinoma	Unknown	8.3 Carcinoma of trachea,bronchus, and lung	Unclassified	XI(f) Other and unspecified carcinomas	Right - origin of primary	Positive histology	Blank(s)	IV	Blank(s)	Blank(s)	Blank(s)	Blank(s)	Blank(s)	T1	N2	M1	Blank(s)	Blank(s)	Blank(s)	D	D	Distant	Blank(s)	Blank(s)	0	None	None; diagnosed at autopsy	No radiation and/or cancer-directed surgery	Not recommended	None	Blank(s)	Blank(s)	Blank(s)	Blank(s)	Blank(s)	26	100	200	40	988	Blank(s)	Blank(s)
155	86	1920	2006	Male	White	C34.1-Upper lobe, lung	8013/3: Large cell neuroendocrine carcinoma	Poorly differentiated; Grade III	8.3 Carcinoma of trachea,bronchus, and lung	Unclassified	XI(f) Other and unspecified carcinomas	Left - origin of primary	Positive histology	Blank(s)	IB	Blank(s)	Blank(s)	Blank(s)	Blank(s)	Blank(s)	T2	N0	M0	Blank(s)	Blank(s)	Blank(s)	L	L	Localized	Blank(s)	Blank(s)	33	Number of regional lymph nodes removed unknown	None; diagnosed at autopsy	No radiation and/or cancer-directed surgery	Surgery performed	None	Blank(s)	Blank(s)	Blank(s)	Blank(s)	Blank(s)	33	100	0	0	988	Blank(s)	Blank(s)
156	54	1952	2006	Female	White	C34.1-Upper lobe, lung	8013/3: Large cell neuroendocrine carcinoma	Poorly differentiated; Grade III	8.3 Carcinoma of trachea,bronchus, and lung	Unclassified	XI(f) Other and unspecified carcinomas	Right - origin of primary	Positive exfoliative cytology, no positive histology	Blank(s)	IIIA	Blank(s)	Blank(s)	Blank(s)	Blank(s)	Blank(s)	T2	N2	M0	Blank(s)	Blank(s)	Blank(s)	RN	RN	Regional	Blank(s)	Blank(s)	0	None	None; diagnosed at autopsy	No radiation and/or cancer-directed surgery	Not recommended	Beam radiation	Blank(s)	Blank(s)	Blank(s)	Blank(s)	Blank(s)	40	100	200	0	988	Blank(s)	Blank(s)
157	57	1951	2008	Female	White	C34.1-Upper lobe, lung	8013/3: Large cell neuroendocrine carcinoma	Unknown	8.3 Carcinoma of trachea,bronchus, and lung	Unclassified	XI(f) Other and unspecified carcinomas	Left - origin of primary	Positive histology	Blank(s)	IIA	Blank(s)	Blank(s)	Blank(s)	Blank(s)	Blank(s)	T1	N1	M0	Blank(s)	Blank(s)	Blank(s)	RN	RN	Regional	Blank(s)	Blank(s)	56	4 or more regional lymph nodes removed	Non-primary surgical procedure to other regional sites	No radiation and/or cancer-directed surgery	Surgery performed	None	Blank(s)	Blank(s)	Blank(s)	Blank(s)	Blank(s)	20	100	100	0	988	Blank(s)	Blank(s)
158	57	1949	2006	Male	Black	C34.1-Upper lobe, lung	8013/3: Large cell neuroendocrine carcinoma	Poorly differentiated; Grade III	8.3 Carcinoma of trachea,bronchus, and lung	Unclassified	XI(f) Other and unspecified carcinomas	Left - origin of primary	Positive histology	Blank(s)	IB	Blank(s)	Blank(s)	Blank(s)	Blank(s)	Blank(s)	T2	N0	M0	Blank(s)	Blank(s)	Blank(s)	RE	RE	Regional	Blank(s)	Blank(s)	33	4 or more regional lymph nodes removed	None; diagnosed at autopsy	No radiation and/or cancer-directed surgery	Surgery performed	None	Blank(s)	Blank(s)	Blank(s)	Blank(s)	Blank(s)	30	450	0	0	988	Blank(s)	Blank(s)
159	71	1934	2006	Male	White	C34.1-Upper lobe, lung	8013/3: Large cell neuroendocrine carcinoma	Poorly differentiated; Grade III	8.3 Carcinoma of trachea,bronchus, and lung	Unclassified	XI(f) Other and unspecified carcinomas	Left - origin of primary	Positive histology	Blank(s)	IIIA	Blank(s)	Blank(s)	Blank(s)	Blank(s)	Blank(s)	T1	N2	M0	Blank(s)	Blank(s)	Blank(s)	RN	RN	Regional	Blank(s)	Blank(s)	33	4 or more regional lymph nodes removed	None; diagnosed at autopsy	No radiation and/or cancer-directed surgery	Surgery performed	None	Blank(s)	Blank(s)	Blank(s)	Blank(s)	Blank(s)	20	110	200	0	988	Blank(s)	Blank(s)
160	67	1939	2006	Male	White	C34.1-Upper lobe, lung	8013/3: Large cell neuroendocrine carcinoma	Poorly differentiated; Grade III	8.3 Carcinoma of trachea,bronchus, and lung	Unclassified	XI(f) Other and unspecified carcinomas	Left - origin of primary	Positive histology	Blank(s)	IB	Blank(s)	Blank(s)	Blank(s)	Blank(s)	Blank(s)	T2	N0	M0	Blank(s)	Blank(s)	Blank(s)	L	L	Localized	Blank(s)	Blank(s)	0	None	None; diagnosed at autopsy	No radiation and/or cancer-directed surgery	Not recommended	None	Blank(s)	Blank(s)	Blank(s)	Blank(s)	Blank(s)	30	210	0	0	988	Blank(s)	Blank(s)
161	73	1933	2006	Female	White	C34.1-Upper lobe, lung	8013/3: Large cell neuroendocrine carcinoma	Unknown	8.3 Carcinoma of trachea,bronchus, and lung	Unclassified	XI(f) Other and unspecified carcinomas	Right - origin of primary	Positive histology	Blank(s)	IV	Blank(s)	Blank(s)	Blank(s)	Blank(s)	Blank(s)	T4	N0	M1	Blank(s)	Blank(s)	Blank(s)	D	D	Distant	Blank(s)	Blank(s)	0	None	None; diagnosed at autopsy	No radiation and/or cancer-directed surgery	Not recommended	Beam radiation	Blank(s)	Blank(s)	Blank(s)	Blank(s)	Blank(s)	29	700	0	40	988	Blank(s)	Blank(s)
162	61	1946	2007	Male	White	C34.1-Upper lobe, lung	8013/3: Large cell neuroendocrine carcinoma	Poorly differentiated; Grade III	8.3 Carcinoma of trachea,bronchus, and lung	Unclassified	XI(f) Other and unspecified carcinomas	Right - origin of primary	Positive histology	Blank(s)	IIIA	Blank(s)	Blank(s)	Blank(s)	Blank(s)	Blank(s)	T2	N2	M0	Blank(s)	Blank(s)	Blank(s)	RE+RN	RE+RN	Regional	Blank(s)	Blank(s)	0	1 to 3 regional lymph nodes removed	None; diagnosed at autopsy	Radiation after surgery	Not recommended	Beam radiation	Blank(s)	Blank(s)	Blank(s)	Blank(s)	Blank(s)	30	450	200	0	988	Blank(s)	Blank(s)
163	71	1937	2008	Male	White	C34.1-Upper lobe, lung	8013/3: Large cell neuroendocrine carcinoma	Poorly differentiated; Grade III	8.3 Carcinoma of trachea,bronchus, and lung	Unclassified	XI(f) Other and unspecified carcinomas	Right - origin of primary	Positive histology	Blank(s)	IA	Blank(s)	Blank(s)	Blank(s)	Blank(s)	Blank(s)	T1	N0	M0	Blank(s)	Blank(s)	Blank(s)	L	L	Localized	Blank(s)	Blank(s)	33	4 or more regional lymph nodes removed	None; diagnosed at autopsy	No radiation and/or cancer-directed surgery	Surgery performed	None	Blank(s)	Blank(s)	Blank(s)	Blank(s)	Blank(s)	16	100	0	0	988	Blank(s)	Blank(s)
164	64	1942	2007	Male	White	C34.9-Lung, NOS	8013/3: Large cell neuroendocrine carcinoma	Poorly differentiated; Grade III	8.3 Carcinoma of trachea,bronchus, and lung	Unclassified	XI(f) Other and unspecified carcinomas	Right - origin of primary	Positive histology	Blank(s)	IIIB	Blank(s)	Blank(s)	Blank(s)	Blank(s)	Blank(s)	TX	N3	M0	Blank(s)	Blank(s)	Blank(s)	D	D	Distant	Blank(s)	Blank(s)	0	None	None; diagnosed at autopsy	No radiation and/or cancer-directed surgery	Not recommended, contraindicated due to other cond; autopsy only (1973-2002)	None	Blank(s)	Blank(s)	Blank(s)	Blank(s)	Blank(s)	999	300	600	0	988	Blank(s)	Blank(s)
165	77	1930	2008	Female	White	C34.1-Upper lobe, lung	8013/3: Large cell neuroendocrine carcinoma	Poorly differentiated; Grade III	8.3 Carcinoma of trachea,bronchus, and lung	Unclassified	XI(f) Other and unspecified carcinomas	Right - origin of primary	Positive histology	Blank(s)	IA	Blank(s)	Blank(s)	Blank(s)	Blank(s)	Blank(s)	T1	N0	M0	Blank(s)	Blank(s)	Blank(s)	L	L	Localized	Blank(s)	Blank(s)	33	4 or more regional lymph nodes removed	Non-primary surgical procedure to other regional sites	No radiation and/or cancer-directed surgery	Surgery performed	None	Blank(s)	Blank(s)	Blank(s)	Blank(s)	Blank(s)	20	100	0	0	988	Blank(s)	Blank(s)
166	73	1933	2007	Male	White	C34.1-Upper lobe, lung	8013/3: Large cell neuroendocrine carcinoma	Poorly differentiated; Grade III	8.3 Carcinoma of trachea,bronchus, and lung	Unclassified	XI(f) Other and unspecified carcinomas	Left - origin of primary	Positive histology	Blank(s)	IB	Blank(s)	Blank(s)	Blank(s)	Blank(s)	Blank(s)	T2	N0	M0	Blank(s)	Blank(s)	Blank(s)	RE	RE	Regional	Blank(s)	Blank(s)	45	4 or more regional lymph nodes removed	None; diagnosed at autopsy	No radiation and/or cancer-directed surgery	Surgery performed	None	Blank(s)	Blank(s)	Blank(s)	Blank(s)	Blank(s)	55	450	0	0	988	Blank(s)	Blank(s)
167	68	1938	2007	Male	White	C34.2-Middle lobe, lung	8013/3: Large cell neuroendocrine carcinoma	Moderately differentiated; Grade II	8.3 Carcinoma of trachea,bronchus, and lung	Unclassified	XI(f) Other and unspecified carcinomas	Right - origin of primary	Positive histology	Blank(s)	IIA	Blank(s)	Blank(s)	Blank(s)	Blank(s)	Blank(s)	T1	N1	M0	Blank(s)	Blank(s)	Blank(s)	RN	RN	Regional	Blank(s)	Blank(s)	21	Number of regional lymph nodes removed unknown	None; diagnosed at autopsy	No radiation and/or cancer-directed surgery	Surgery performed	None	Blank(s)	Blank(s)	Blank(s)	Blank(s)	Blank(s)	10	100	100	0	988	Blank(s)	Blank(s)
168	56	1951	2007	Female	White	C34.1-Upper lobe, lung	8013/3: Large cell neuroendocrine carcinoma	Poorly differentiated; Grade III	8.3 Carcinoma of trachea,bronchus, and lung	Unclassified	XI(f) Other and unspecified carcinomas	Left - origin of primary	Positive histology	Blank(s)	IV	Blank(s)	Blank(s)	Blank(s)	Blank(s)	Blank(s)	T4	N0	M1	Blank(s)	Blank(s)	Blank(s)	D	D	Distant	Blank(s)	Blank(s)	0	Biopsy or aspiration of regional lymph node, NOS	None; diagnosed at autopsy	No radiation and/or cancer-directed surgery	Not recommended	None	Blank(s)	Blank(s)	Blank(s)	Blank(s)	Blank(s)	999	720	0	40	988	Blank(s)	Blank(s)
169	48	1959	2007	Male	White	C34.1-Upper lobe, lung	8013/3: Large cell neuroendocrine carcinoma	Undifferentiated; anaplastic; Grade IV	8.3 Carcinoma of trachea,bronchus, and lung	Unclassified	XI(f) Other and unspecified carcinomas	Left - origin of primary	Positive histology	Blank(s)	IV	Blank(s)	Blank(s)	Blank(s)	Blank(s)	Blank(s)	T2	N2	M1	Blank(s)	Blank(s)	Blank(s)	D	D	Distant	Blank(s)	Blank(s)	0	None	None; diagnosed at autopsy	No radiation and/or cancer-directed surgery	Not recommended	Beam radiation	Blank(s)	Blank(s)	Blank(s)	Blank(s)	Blank(s)	40	450	200	40	988	Blank(s)	Blank(s)
170	69	1937	2007	Female	White	C34.3-Lower lobe, lung	8013/3: Large cell neuroendocrine carcinoma	Unknown	8.3 Carcinoma of trachea,bronchus, and lung	Unclassified	XI(f) Other and unspecified carcinomas	Right - origin of primary	Positive histology	Blank(s)	IA	Blank(s)	Blank(s)	Blank(s)	Blank(s)	Blank(s)	T1	N0	M0	Blank(s)	Blank(s)	Blank(s)	L	L	Localized	Blank(s)	Blank(s)	33	4 or more regional lymph nodes removed	None; diagnosed at autopsy	No radiation and/or cancer-directed surgery	Surgery performed	None	Blank(s)	Blank(s)	Blank(s)	Blank(s)	Blank(s)	17	100	0	0	988	Blank(s)	Blank(s)
171	79	1927	2007	Male	White	C34.3-Lower lobe, lung	8013/3: Large cell neuroendocrine carcinoma	Unknown	8.3 Carcinoma of trachea,bronchus, and lung	Unclassified	XI(f) Other and unspecified carcinomas	Left - origin of primary	Positive histology	Blank(s)	IIIB	Blank(s)	Blank(s)	Blank(s)	Blank(s)	Blank(s)	T4	N2	M0	Blank(s)	Blank(s)	Blank(s)	RE+RN	RE+RN	Regional	Blank(s)	Blank(s)	0	None	None; diagnosed at autopsy	No radiation and/or cancer-directed surgery	Not recommended	Beam radiation	Blank(s)	Blank(s)	Blank(s)	Blank(s)	Blank(s)	74	700	200	0	988	Blank(s)	Blank(s)
172	66	1940	2007	Male	White	C34.3-Lower lobe, lung	8013/3: Large cell neuroendocrine carcinoma	Poorly differentiated; Grade III	8.3 Carcinoma of trachea,bronchus, and lung	Unclassified	XI(f) Other and unspecified carcinomas	Left - origin of primary	Positive histology	Blank(s)	IIB	Blank(s)	Blank(s)	Blank(s)	Blank(s)	Blank(s)	T2	N1	M0	Blank(s)	Blank(s)	Blank(s)	RN	RN	Regional	Blank(s)	Blank(s)	56	4 or more regional lymph nodes removed	None; diagnosed at autopsy	No radiation and/or cancer-directed surgery	Surgery performed	None	Blank(s)	Blank(s)	Blank(s)	Blank(s)	Blank(s)	58	200	100	0	988	Blank(s)	Blank(s)
173	72	1934	2007	Female	White	C34.1-Upper lobe, lung	8013/3: Large cell neuroendocrine carcinoma	Unknown	8.3 Carcinoma of trachea,bronchus, and lung	Unclassified	XI(f) Other and unspecified carcinomas	Right - origin of primary	Positive histology	Blank(s)	IIIA	Blank(s)	Blank(s)	Blank(s)	Blank(s)	Blank(s)	T1	N2	M0	Blank(s)	Blank(s)	Blank(s)	RN	RN	Regional	Blank(s)	Blank(s)	0	4 or more regional lymph nodes removed	None; diagnosed at autopsy	Radiation after surgery	Not recommended	Beam radiation	Blank(s)	Blank(s)	Blank(s)	Blank(s)	Blank(s)	17	300	200	0	988	Blank(s)	Blank(s)
174	62	1944	2007	Male	White	C34.9-Lung, NOS	8013/3: Large cell neuroendocrine carcinoma	Poorly differentiated; Grade III	8.3 Carcinoma of trachea,bronchus, and lung	Unclassified	XI(f) Other and unspecified carcinomas	Paired site, but no information concerning laterality	Positive histology	Blank(s)	IV	Blank(s)	Blank(s)	Blank(s)	Blank(s)	Blank(s)	T4	N3	M1	Blank(s)	Blank(s)	Blank(s)	D	D	Distant	Blank(s)	Blank(s)	0	Biopsy or aspiration of regional lymph node, NOS	None; diagnosed at autopsy	Radiation after surgery	Not recommended	Beam radiation	Blank(s)	Blank(s)	Blank(s)	Blank(s)	Blank(s)	999	720	600	30	988	Blank(s)	Blank(s)
175	78	1928	2007	Female	White	C34.1-Upper lobe, lung	8013/3: Large cell neuroendocrine carcinoma	Unknown	8.3 Carcinoma of trachea,bronchus, and lung	Unclassified	XI(f) Other and unspecified carcinomas	Left - origin of primary	Positive histology	Blank(s)	IA	Blank(s)	Blank(s)	Blank(s)	Blank(s)	Blank(s)	T1	N0	M0	Blank(s)	Blank(s)	Blank(s)	L	L	Localized	Blank(s)	Blank(s)	21	1 to 3 regional lymph nodes removed	None; diagnosed at autopsy	No radiation and/or cancer-directed surgery	Surgery performed	None	Blank(s)	Blank(s)	Blank(s)	Blank(s)	Blank(s)	30	100	0	0	988	Blank(s)	Blank(s)
176	56	1956	2013	Female	Black	C34.1-Upper lobe, lung	8013/3: Large cell neuroendocrine carcinoma	Unknown	8.3 Carcinoma of trachea,bronchus, and lung	Unclassified	XI(f) Other and unspecified carcinomas	Left - origin of primary	Positive histology	IV	IV	Blank(s)	Blank(s)	T4	N3	M1b	TX	N3	M1	Blank(s)	Blank(s)	Blank(s)	D	D	Distant	Blank(s)	Blank(s)	0	None	None; diagnosed at autopsy	No radiation and/or cancer-directed surgery	Not recommended	None	Blank(s)	Blank(s)	Blank(s)	Blank(s)	Blank(s)	999	999	600	36	20	998	Blank(s)
177	69	1942	2011	Male	White	C34.1-Upper lobe, lung	8013/3: Large cell neuroendocrine carcinoma	Unknown	8.3 Carcinoma of trachea,bronchus, and lung	Unclassified	XI(f) Other and unspecified carcinomas	Right - origin of primary	Positive histology	IA	IA	Blank(s)	Blank(s)	T1a	N0	M0	T1	N0	M0	Blank(s)	Blank(s)	Blank(s)	L	L	Localized	Blank(s)	Blank(s)	33	4 or more regional lymph nodes removed	None; diagnosed at autopsy	No radiation and/or cancer-directed surgery	Surgery performed	None	Blank(s)	Blank(s)	Blank(s)	Blank(s)	Blank(s)	18	100	0	0	0	0	Blank(s)
178	72	1934	2007	Male	White	C34.1-Upper lobe, lung	8013/3: Large cell neuroendocrine carcinoma	Undifferentiated; anaplastic; Grade IV	8.3 Carcinoma of trachea,bronchus, and lung	Unclassified	XI(f) Other and unspecified carcinomas	Left - origin of primary	Positive histology	Blank(s)	IB	Blank(s)	Blank(s)	Blank(s)	Blank(s)	Blank(s)	T2	N0	M0	Blank(s)	Blank(s)	Blank(s)	RE	RE	Regional	Blank(s)	Blank(s)	33	4 or more regional lymph nodes removed	None; diagnosed at autopsy	No radiation and/or cancer-directed surgery	Surgery performed	None	Blank(s)	Blank(s)	Blank(s)	Blank(s)	Blank(s)	70	450	0	0	988	Blank(s)	Blank(s)
179	60	1947	2008	Female	White	C34.3-Lower lobe, lung	8013/3: Large cell neuroendocrine carcinoma	Poorly differentiated; Grade III	8.3 Carcinoma of trachea,bronchus, and lung	Unclassified	XI(f) Other and unspecified carcinomas	Right - origin of primary	Positive histology	Blank(s)	IV	Blank(s)	Blank(s)	Blank(s)	Blank(s)	Blank(s)	T2	N0	M1	Blank(s)	Blank(s)	Blank(s)	D	D	Distant	Blank(s)	Blank(s)	21	None	None; diagnosed at autopsy	No radiation and/or cancer-directed surgery	Surgery performed	None	Blank(s)	Blank(s)	Blank(s)	Blank(s)	Blank(s)	60	210	0	40	988	Blank(s)	Blank(s)
180	55	1954	2009	Male	White	C34.3-Lower lobe, lung	8013/3: Large cell neuroendocrine carcinoma	Poorly differentiated; Grade III	8.3 Carcinoma of trachea,bronchus, and lung	Unclassified	XI(f) Other and unspecified carcinomas	Left - origin of primary	Positive histology	Blank(s)	IIA	Blank(s)	Blank(s)	Blank(s)	Blank(s)	Blank(s)	T1	N1	M0	Blank(s)	Blank(s)	Blank(s)	RN	RN	Regional	Blank(s)	Blank(s)	33	4 or more regional lymph nodes removed	None; diagnosed at autopsy	Radiation after surgery	Surgery performed	Beam radiation	Blank(s)	Blank(s)	Blank(s)	Blank(s)	Blank(s)	30	100	100	0	0	Blank(s)	Blank(s)
181	52	1955	2008	Male	White	C34.1-Upper lobe, lung	8013/3: Large cell neuroendocrine carcinoma	Poorly differentiated; Grade III	8.3 Carcinoma of trachea,bronchus, and lung	Unclassified	XI(f) Other and unspecified carcinomas	Left - origin of primary	Positive histology	Blank(s)	IB	Blank(s)	Blank(s)	Blank(s)	Blank(s)	Blank(s)	T2	N0	M0	Blank(s)	Blank(s)	Blank(s)	L	L	Localized	Blank(s)	Blank(s)	21	4 or more regional lymph nodes removed	None; diagnosed at autopsy	No radiation and/or cancer-directed surgery	Surgery performed	None	Blank(s)	Blank(s)	Blank(s)	Blank(s)	Blank(s)	20	200	0	0	988	Blank(s)	Blank(s)
182	79	1928	2008	Female	White	C34.1-Upper lobe, lung	8013/3: Large cell neuroendocrine carcinoma	Unknown	8.3 Carcinoma of trachea,bronchus, and lung	Unclassified	XI(f) Other and unspecified carcinomas	Right - origin of primary	Positive histology	Blank(s)	IA	Blank(s)	Blank(s)	Blank(s)	Blank(s)	Blank(s)	T1	N0	M0	Blank(s)	Blank(s)	Blank(s)	L	L	Localized	Blank(s)	Blank(s)	33	4 or more regional lymph nodes removed	Non-primary surgical procedure performed	No radiation and/or cancer-directed surgery	Surgery performed	None	Blank(s)	Blank(s)	Blank(s)	Blank(s)	Blank(s)	23	100	0	0	988	Blank(s)	Blank(s)
183	70	1938	2008	Male	White	C34.1-Upper lobe, lung	8013/3: Large cell neuroendocrine carcinoma	Unknown	8.3 Carcinoma of trachea,bronchus, and lung	Unclassified	XI(f) Other and unspecified carcinomas	Left - origin of primary	Positive histology	Blank(s)	IV	Blank(s)	Blank(s)	Blank(s)	Blank(s)	Blank(s)	T1	N0	M1	Blank(s)	Blank(s)	Blank(s)	D	D	Distant	Blank(s)	Blank(s)	33	1 to 3 regional lymph nodes removed	None; diagnosed at autopsy	Radiation prior to surgery	Surgery performed	Beam radiation	Blank(s)	Blank(s)	Blank(s)	Blank(s)	Blank(s)	30	300	0	40	999	Blank(s)	Blank(s)
184	60	1948	2008	Male	White	C34.9-Lung, NOS	8013/3: Large cell neuroendocrine carcinoma	Unknown	8.3 Carcinoma of trachea,bronchus, and lung	Unclassified	XI(f) Other and unspecified carcinomas	Paired site, but no information concerning laterality	Positive histology	Blank(s)	IV	Blank(s)	Blank(s)	Blank(s)	Blank(s)	Blank(s)	T0	N0	M1	Blank(s)	Blank(s)	Blank(s)	D	D	Distant	Blank(s)	Blank(s)	0	None	None; diagnosed at autopsy	No radiation and/or cancer-directed surgery	Not recommended	None	Blank(s)	Blank(s)	Blank(s)	Blank(s)	Blank(s)	0	950	0	40	988	Blank(s)	Blank(s)
185	68	1941	2009	Female	White	C34.3-Lower lobe, lung	8013/3: Large cell neuroendocrine carcinoma	Undifferentiated; anaplastic; Grade IV	8.3 Carcinoma of trachea,bronchus, and lung	Unclassified	XI(f) Other and unspecified carcinomas	Left - origin of primary	Positive histology	Blank(s)	IA	Blank(s)	Blank(s)	Blank(s)	Blank(s)	Blank(s)	T1	N0	M0	Blank(s)	Blank(s)	Blank(s)	L	L	Localized	Blank(s)	Blank(s)	33	4 or more regional lymph nodes removed	None; diagnosed at autopsy	No radiation and/or cancer-directed surgery	Surgery performed	None	Blank(s)	Blank(s)	Blank(s)	Blank(s)	Blank(s)	25	100	0	0	0	Blank(s)	Blank(s)
186	80	1927	2008	Male	White	C34.3-Lower lobe, lung	8013/3: Large cell neuroendocrine carcinoma	Unknown	8.3 Carcinoma of trachea,bronchus, and lung	Unclassified	XI(f) Other and unspecified carcinomas	Right - origin of primary	Positive histology	Blank(s)	IV	Blank(s)	Blank(s)	Blank(s)	Blank(s)	Blank(s)	T2	N2	M1	Blank(s)	Blank(s)	Blank(s)	D	D	Distant	Blank(s)	Blank(s)	0	None	None; diagnosed at autopsy	No radiation and/or cancer-directed surgery	Not recommended	None	Blank(s)	Blank(s)	Blank(s)	Blank(s)	Blank(s)	51	100	200	37	988	Blank(s)	Blank(s)
187	85	1923	2008	Female	White	C34.2-Middle lobe, lung	8013/3: Large cell neuroendocrine carcinoma	Poorly differentiated; Grade III	8.3 Carcinoma of trachea,bronchus, and lung	Unclassified	XI(f) Other and unspecified carcinomas	Right - origin of primary	Positive histology	Blank(s)	IA	Blank(s)	Blank(s)	Blank(s)	Blank(s)	Blank(s)	T1	N0	M0	Blank(s)	Blank(s)	Blank(s)	L	L	Localized	Blank(s)	Blank(s)	33	1 to 3 regional lymph nodes removed	None; diagnosed at autopsy	No radiation and/or cancer-directed surgery	Surgery performed	None	Blank(s)	Blank(s)	Blank(s)	Blank(s)	Blank(s)	18	100	0	0	988	Blank(s)	Blank(s)
188	74	1933	2008	Female	White	C34.1-Upper lobe, lung	8013/3: Large cell neuroendocrine carcinoma	Undifferentiated; anaplastic; Grade IV	8.3 Carcinoma of trachea,bronchus, and lung	Unclassified	XI(f) Other and unspecified carcinomas	Left - origin of primary	Positive histology	Blank(s)	IA	Blank(s)	Blank(s)	Blank(s)	Blank(s)	Blank(s)	T1	N0	M0	Blank(s)	Blank(s)	Blank(s)	L	L	Localized	Blank(s)	Blank(s)	33	4 or more regional lymph nodes removed	None; diagnosed at autopsy	No radiation and/or cancer-directed surgery	Surgery performed	None	Blank(s)	Blank(s)	Blank(s)	Blank(s)	Blank(s)	20	100	0	0	988	Blank(s)	Blank(s)
189	65	1944	2009	Male	White	C34.1-Upper lobe, lung	8013/3: Large cell neuroendocrine carcinoma	Poorly differentiated; Grade III	8.3 Carcinoma of trachea,bronchus, and lung	Unclassified	XI(f) Other and unspecified carcinomas	Right - origin of primary	Positive histology	Blank(s)	IIA	Blank(s)	Blank(s)	Blank(s)	Blank(s)	Blank(s)	T1	N1	M0	Blank(s)	Blank(s)	Blank(s)	RN	RN	Regional	Blank(s)	Blank(s)	33	4 or more regional lymph nodes removed	None; diagnosed at autopsy	No radiation and/or cancer-directed surgery	Surgery performed	None	Blank(s)	Blank(s)	Blank(s)	Blank(s)	Blank(s)	20	100	100	0	988	Blank(s)	Blank(s)
190	85	1923	2008	Female	White	C34.1-Upper lobe, lung	8013/3: Large cell neuroendocrine carcinoma	Poorly differentiated; Grade III	8.3 Carcinoma of trachea,bronchus, and lung	Unclassified	XI(f) Other and unspecified carcinomas	Right - origin of primary	Positive histology	Blank(s)	IA	Blank(s)	Blank(s)	Blank(s)	Blank(s)	Blank(s)	T1	N0	M0	Blank(s)	Blank(s)	Blank(s)	L	L	Localized	Blank(s)	Blank(s)	0	None	None; diagnosed at autopsy	No radiation and/or cancer-directed surgery	Not recommended, contraindicated due to other cond; autopsy only (1973-2002)	Beam radiation	Blank(s)	Blank(s)	Blank(s)	Blank(s)	Blank(s)	12	100	0	0	988	Blank(s)	Blank(s)
191	73	1935	2009	Male	White	C34.3-Lower lobe, lung	8013/3: Large cell neuroendocrine carcinoma	Unknown	8.3 Carcinoma of trachea,bronchus, and lung	Unclassified	XI(f) Other and unspecified carcinomas	Right - origin of primary	Positive histology	Blank(s)	IV	Blank(s)	Blank(s)	Blank(s)	Blank(s)	Blank(s)	T4	N3	M1	Blank(s)	Blank(s)	Blank(s)	D	D	Distant	Blank(s)	Blank(s)	0	None	None; diagnosed at autopsy	No radiation and/or cancer-directed surgery	Not recommended	None	Blank(s)	Blank(s)	Blank(s)	Blank(s)	Blank(s)	999	700	600	40	0	Blank(s)	Blank(s)
192	75	1934	2009	Female	White	C34.1-Upper lobe, lung	8013/3: Large cell neuroendocrine carcinoma	Poorly differentiated; Grade III	8.3 Carcinoma of trachea,bronchus, and lung	Unclassified	XI(f) Other and unspecified carcinomas	Left - origin of primary	Positive histology	Blank(s)	IA	Blank(s)	Blank(s)	Blank(s)	Blank(s)	Blank(s)	T1	N0	M0	Blank(s)	Blank(s)	Blank(s)	L	L	Localized	Blank(s)	Blank(s)	33	4 or more regional lymph nodes removed	None; diagnosed at autopsy	No radiation and/or cancer-directed surgery	Surgery performed	None	Blank(s)	Blank(s)	Blank(s)	Blank(s)	Blank(s)	15	100	0	0	0	Blank(s)	Blank(s)
193	58	1951	2009	Female	White	C34.1-Upper lobe, lung	8013/3: Large cell neuroendocrine carcinoma	Unknown	8.3 Carcinoma of trachea,bronchus, and lung	Unclassified	XI(f) Other and unspecified carcinomas	Right - origin of primary	Positive histology	Blank(s)	IV	Blank(s)	Blank(s)	Blank(s)	Blank(s)	Blank(s)	TX	N2	M1	Blank(s)	Blank(s)	Blank(s)	D	D	Distant	Blank(s)	Blank(s)	0	None	Non-primary surgical procedure to distant lymph node(s)	Radiation after surgery	Not recommended	Beam radiation	Blank(s)	Blank(s)	Blank(s)	Blank(s)	Blank(s)	6	999	200	50	999	Blank(s)	Blank(s)
194	56	1952	2009	Female	Black	C34.1-Upper lobe, lung	8013/3: Large cell neuroendocrine carcinoma	Poorly differentiated; Grade III	8.3 Carcinoma of trachea,bronchus, and lung	Unclassified	XI(f) Other and unspecified carcinomas	Left - origin of primary	Positive histology	Blank(s)	IIIB	Blank(s)	Blank(s)	Blank(s)	Blank(s)	Blank(s)	T4	N2	M0	Blank(s)	Blank(s)	Blank(s)	RE+RN	RE+RN	Regional	Blank(s)	Blank(s)	0	None	None; diagnosed at autopsy	No radiation and/or cancer-directed surgery	Not recommended	Beam radiation	Blank(s)	Blank(s)	Blank(s)	Blank(s)	Blank(s)	80	700	200	0	988	Blank(s)	Blank(s)
195	68	1940	2009	Male	White	C34.1-Upper lobe, lung	8013/3: Large cell neuroendocrine carcinoma	Poorly differentiated; Grade III	8.3 Carcinoma of trachea,bronchus, and lung	Unclassified	XI(f) Other and unspecified carcinomas	Right - origin of primary	Positive histology	Blank(s)	IB	Blank(s)	Blank(s)	Blank(s)	Blank(s)	Blank(s)	T2	N0	M0	Blank(s)	Blank(s)	Blank(s)	RE	RE	Regional	Blank(s)	Blank(s)	33	Sentinel node biopsy and lym nd removed different times	None; diagnosed at autopsy	No radiation and/or cancer-directed surgery	Surgery performed	None	Blank(s)	Blank(s)	Blank(s)	Blank(s)	Blank(s)	40	450	0	0	988	Blank(s)	Blank(s)
196	78	1930	2009	Male	White	C34.1-Upper lobe, lung	8013/3: Large cell neuroendocrine carcinoma	Unknown	8.3 Carcinoma of trachea,bronchus, and lung	Unclassified	XI(f) Other and unspecified carcinomas	Right - origin of primary	Positive histology	Blank(s)	IIIB	Blank(s)	Blank(s)	Blank(s)	Blank(s)	Blank(s)	T4	N2	M0	Blank(s)	Blank(s)	Blank(s)	RE+RN	RE+RN	Regional	Blank(s)	Blank(s)	0	4 or more regional lymph nodes removed	Non-primary surgical procedure performed	Radiation after surgery	Not recommended	Beam radiation	Blank(s)	Blank(s)	Blank(s)	Blank(s)	Blank(s)	60	700	200	0	0	Blank(s)	Blank(s)
197	66	1943	2009	Male	White	C34.1-Upper lobe, lung	8013/3: Large cell neuroendocrine carcinoma	Unknown	8.3 Carcinoma of trachea,bronchus, and lung	Unclassified	XI(f) Other and unspecified carcinomas	Right - origin of primary	Positive histology	Blank(s)	IIIB	Blank(s)	Blank(s)	Blank(s)	Blank(s)	Blank(s)	T4	N2	M0	Blank(s)	Blank(s)	Blank(s)	RE+RN	RE+RN	Regional	Blank(s)	Blank(s)	0	None	None; diagnosed at autopsy	No radiation and/or cancer-directed surgery	Not recommended	Beam radiation	Blank(s)	Blank(s)	Blank(s)	Blank(s)	Blank(s)	999	700	200	0	0	Blank(s)	Blank(s)
198	78	1935	2013	Male	White	C34.1-Upper lobe, lung	8013/3: Large cell neuroendocrine carcinoma	Undifferentiated; anaplastic; Grade IV	8.3 Carcinoma of trachea,bronchus, and lung	Unclassified	XI(f) Other and unspecified carcinomas	Left - origin of primary	Positive histology	IA	IA	Blank(s)	Blank(s)	T1b	N0	M0	T1	N0	M0	Blank(s)	Blank(s)	Blank(s)	L	L	Localized	Blank(s)	Blank(s)	21	Number of regional lymph nodes removed unknown	None; diagnosed at autopsy	No radiation and/or cancer-directed surgery	Surgery performed	None	Blank(s)	Blank(s)	Blank(s)	Blank(s)	Blank(s)	26	120	0	0	0	0	Blank(s)
199	65	1943	2009	Male	White	C34.1-Upper lobe, lung	8013/3: Large cell neuroendocrine carcinoma	Unknown	8.3 Carcinoma of trachea,bronchus, and lung	Unclassified	XI(f) Other and unspecified carcinomas	Right - origin of primary	Positive histology	Blank(s)	IV	Blank(s)	Blank(s)	Blank(s)	Blank(s)	Blank(s)	T1	N2	M1	Blank(s)	Blank(s)	Blank(s)	D	D	Distant	Blank(s)	Blank(s)	21	None	None; diagnosed at autopsy	No radiation and/or cancer-directed surgery	Surgery performed	None	Blank(s)	Blank(s)	Blank(s)	Blank(s)	Blank(s)	10	100	200	40	0	Blank(s)	Blank(s)
200	76	1933	2009	Female	White	C34.1-Upper lobe, lung	8013/3: Large cell neuroendocrine carcinoma	Undifferentiated; anaplastic; Grade IV	8.3 Carcinoma of trachea,bronchus, and lung	Unclassified	XI(f) Other and unspecified carcinomas	Right - origin of primary	Positive histology	Blank(s)	IIIB	Blank(s)	Blank(s)	Blank(s)	Blank(s)	Blank(s)	T4	N0	M0	Blank(s)	Blank(s)	Blank(s)	L	RE	Regional	Blank(s)	Blank(s)	33	4 or more regional lymph nodes removed	None; diagnosed at autopsy	No radiation and/or cancer-directed surgery	Surgery performed	None	Blank(s)	Blank(s)	Blank(s)	Blank(s)	Blank(s)	13	650	0	0	988	Blank(s)	Blank(s)
201	70	1938	2009	Female	White	C34.1-Upper lobe, lung	8013/3: Large cell neuroendocrine carcinoma	Unknown	8.3 Carcinoma of trachea,bronchus, and lung	Unclassified	XI(f) Other and unspecified carcinomas	Left - origin of primary	Positive histology	Blank(s)	IIIB	Blank(s)	Blank(s)	Blank(s)	Blank(s)	Blank(s)	T4	N3	M0	Blank(s)	Blank(s)	Blank(s)	D	D	Distant	Blank(s)	Blank(s)	0	None	None; diagnosed at autopsy	No radiation and/or cancer-directed surgery	Not recommended	Beam radiation	Blank(s)	Blank(s)	Blank(s)	Blank(s)	Blank(s)	87	700	600	0	988	Blank(s)	Blank(s)
202	70	1939	2009	Male	White	C34.8-Overlapping lesion of lung	8013/3: Large cell neuroendocrine carcinoma	Unknown	8.3 Carcinoma of trachea,bronchus, and lung	Unclassified	XI(f) Other and unspecified carcinomas	Left - origin of primary	Positive histology	Blank(s)	IV	Blank(s)	Blank(s)	Blank(s)	Blank(s)	Blank(s)	T3	N1	M1	Blank(s)	Blank(s)	Blank(s)	D	D	Distant	Blank(s)	Blank(s)	0	None	None; diagnosed at autopsy	No radiation and/or cancer-directed surgery	Not recommended, contraindicated due to other cond; autopsy only (1973-2002)	Beam radiation	Blank(s)	Blank(s)	Blank(s)	Blank(s)	Blank(s)	999	730	500	40	0	Blank(s)	Blank(s)
203	68	1941	2009	Male	White	C34.1-Upper lobe, lung	8013/3: Large cell neuroendocrine carcinoma	Poorly differentiated; Grade III	8.3 Carcinoma of trachea,bronchus, and lung	Unclassified	XI(f) Other and unspecified carcinomas	Right - origin of primary	Positive histology	Blank(s)	IB	Blank(s)	Blank(s)	Blank(s)	Blank(s)	Blank(s)	T2	N0	M0	Blank(s)	Blank(s)	Blank(s)	RE	RE	Regional	Blank(s)	Blank(s)	33	4 or more regional lymph nodes removed	None; diagnosed at autopsy	No radiation and/or cancer-directed surgery	Surgery performed	None	Blank(s)	Blank(s)	Blank(s)	Blank(s)	Blank(s)	35	430	0	0	0	Blank(s)	Blank(s)
204	59	1950	2009	Male	White	C34.1-Upper lobe, lung	8013/3: Large cell neuroendocrine carcinoma	Unknown	8.3 Carcinoma of trachea,bronchus, and lung	Unclassified	XI(f) Other and unspecified carcinomas	Left - origin of primary	Positive histology	Blank(s)	IV	Blank(s)	Blank(s)	Blank(s)	Blank(s)	Blank(s)	T2	N2	M1	Blank(s)	Blank(s)	Blank(s)	D	D	Distant	Blank(s)	Blank(s)	0	None	None; diagnosed at autopsy	No radiation and/or cancer-directed surgery	Not recommended	None	Blank(s)	Blank(s)	Blank(s)	Blank(s)	Blank(s)	999	400	200	40	0	Blank(s)	Blank(s)
205	55	1953	2008	Male	White	C34.9-Lung, NOS	8013/3: Large cell neuroendocrine carcinoma	Unknown	8.3 Carcinoma of trachea,bronchus, and lung	Unclassified	XI(f) Other and unspecified carcinomas	Left - origin of primary	Positive histology	Blank(s)	IV	Blank(s)	Blank(s)	Blank(s)	Blank(s)	Blank(s)	TX	NX	M1	Blank(s)	Blank(s)	Blank(s)	D	D	Distant	Blank(s)	Blank(s)	0	None	None; diagnosed at autopsy	No radiation and/or cancer-directed surgery	Not recommended, contraindicated due to other cond; autopsy only (1973-2002)	Beam radiation	Blank(s)	Blank(s)	Blank(s)	Blank(s)	Blank(s)	999	999	999	40	988	Blank(s)	Blank(s)
206	66	1942	2009	Male	White	C34.0-Main bronchus	8013/3: Large cell neuroendocrine carcinoma	Unknown	8.3 Carcinoma of trachea,bronchus, and lung	Unclassified	XI(f) Other and unspecified carcinomas	Right - origin of primary	Positive histology	Blank(s)	IV	Blank(s)	Blank(s)	Blank(s)	Blank(s)	Blank(s)	T2	N3	M1	Blank(s)	Blank(s)	Blank(s)	D	D	Distant	Blank(s)	Blank(s)	0	None	None; diagnosed at autopsy	No radiation and/or cancer-directed surgery	Not recommended	None	Blank(s)	Blank(s)	Blank(s)	Blank(s)	Blank(s)	100	230	600	40	988	Blank(s)	Blank(s)
207	58	1950	2009	Male	White	C34.1-Upper lobe, lung	8013/3: Large cell neuroendocrine carcinoma	Unknown	8.3 Carcinoma of trachea,bronchus, and lung	Unclassified	XI(f) Other and unspecified carcinomas	Right - origin of primary	Positive histology	Blank(s)	IA	Blank(s)	Blank(s)	Blank(s)	Blank(s)	Blank(s)	T1	N0	M0	Blank(s)	Blank(s)	Blank(s)	L	L	Localized	Blank(s)	Blank(s)	45	4 or more regional lymph nodes removed	None; diagnosed at autopsy	No radiation and/or cancer-directed surgery	Surgery performed	None	Blank(s)	Blank(s)	Blank(s)	Blank(s)	Blank(s)	26	100	0	0	0	Blank(s)	Blank(s)
208	39	1969	2009	Male	White	C34.9-Lung, NOS	8013/3: Large cell neuroendocrine carcinoma	Poorly differentiated; Grade III	8.3 Carcinoma of trachea,bronchus, and lung	Unclassified	XI(f) Other and unspecified carcinomas	Left - origin of primary	Positive histology	Blank(s)	IIIB	Blank(s)	Blank(s)	Blank(s)	Blank(s)	Blank(s)	T4	N0	M0	Blank(s)	Blank(s)	Blank(s)	RE	RE	Regional	Blank(s)	Blank(s)	19	None	None; diagnosed at autopsy	No radiation and/or cancer-directed surgery	Surgery performed	None	Blank(s)	Blank(s)	Blank(s)	Blank(s)	Blank(s)	17	700	0	0	0	Blank(s)	Blank(s)
209	63	1945	2009	Male	White	C34.1-Upper lobe, lung	8013/3: Large cell neuroendocrine carcinoma	Unknown	8.3 Carcinoma of trachea,bronchus, and lung	Unclassified	XI(f) Other and unspecified carcinomas	Left - origin of primary	Positive histology	Blank(s)	IA	Blank(s)	Blank(s)	Blank(s)	Blank(s)	Blank(s)	T1	N0	M0	Blank(s)	Blank(s)	Blank(s)	L	L	Localized	Blank(s)	Blank(s)	33	4 or more regional lymph nodes removed	None; diagnosed at autopsy	No radiation and/or cancer-directed surgery	Surgery performed	None	Blank(s)	Blank(s)	Blank(s)	Blank(s)	Blank(s)	12	115	0	0	0	Blank(s)	Blank(s)
210	77	1932	2009	Male	White	C34.3-Lower lobe, lung	8013/3: Large cell neuroendocrine carcinoma	Undifferentiated; anaplastic; Grade IV	8.3 Carcinoma of trachea,bronchus, and lung	Unclassified	XI(f) Other and unspecified carcinomas	Left - origin of primary	Positive histology	Blank(s)	IB	Blank(s)	Blank(s)	Blank(s)	Blank(s)	Blank(s)	T2	N0	M0	Blank(s)	Blank(s)	Blank(s)	RE	RE	Regional	Blank(s)	Blank(s)	22	Number of regional lymph nodes removed unknown	None; diagnosed at autopsy	No radiation and/or cancer-directed surgery	Surgery performed	None	Blank(s)	Blank(s)	Blank(s)	Blank(s)	Blank(s)	27	430	0	0	0	Blank(s)	Blank(s)
211	61	1947	2009	Male	White	C34.1-Upper lobe, lung	8013/3: Large cell neuroendocrine carcinoma	Unknown	8.3 Carcinoma of trachea,bronchus, and lung	Unclassified	XI(f) Other and unspecified carcinomas	Left - origin of primary	Positive histology	Blank(s)	IV	Blank(s)	Blank(s)	Blank(s)	Blank(s)	Blank(s)	T4	N2	M1	Blank(s)	Blank(s)	Blank(s)	D	D	Distant	Blank(s)	Blank(s)	0	None	None; diagnosed at autopsy	No radiation and/or cancer-directed surgery	Not recommended	None	Blank(s)	Blank(s)	Blank(s)	Blank(s)	Blank(s)	59	810	200	23	10	Blank(s)	Blank(s)
212	80	1930	2010	Female	White	C34.1-Upper lobe, lung	8013/3: Large cell neuroendocrine carcinoma	Unknown	8.3 Carcinoma of trachea,bronchus, and lung	Unclassified	XI(f) Other and unspecified carcinomas	Left - origin of primary	Positive histology	IV	IV	Blank(s)	Blank(s)	T2b	N3	M1b	T2	N3	M1	Blank(s)	Blank(s)	Blank(s)	D	D	Distant	Blank(s)	Blank(s)	0	None	None; diagnosed at autopsy	No radiation and/or cancer-directed surgery	Not recommended	None	Blank(s)	Blank(s)	Blank(s)	Blank(s)	Blank(s)	51	100	600	40	0	998	Blank(s)
213	79	1930	2010	Male	White	C34.1-Upper lobe, lung	8013/3: Large cell neuroendocrine carcinoma	Unknown	8.3 Carcinoma of trachea,bronchus, and lung	Unclassified	XI(f) Other and unspecified carcinomas	Right - origin of primary	Positive histology	IIA	IIA	Blank(s)	Blank(s)	T1a	N1	M0	T1	N1	M0	Blank(s)	Blank(s)	Blank(s)	RN	RN	Regional	Blank(s)	Blank(s)	33	4 or more regional lymph nodes removed	None; diagnosed at autopsy	No radiation and/or cancer-directed surgery	Surgery performed	None	Blank(s)	Blank(s)	Blank(s)	Blank(s)	Blank(s)	11	100	100	0	0	0	Blank(s)
214	64	1946	2010	Male	White	C34.3-Lower lobe, lung	8013/3: Large cell neuroendocrine carcinoma	Unknown	8.3 Carcinoma of trachea,bronchus, and lung	Unclassified	XI(f) Other and unspecified carcinomas	Right - origin of primary	Positive histology	IV	IV	Blank(s)	Blank(s)	T2a	N2	M1b	T2	N2	M1	Blank(s)	Blank(s)	Blank(s)	D	D	Distant	Blank(s)	Blank(s)	0	None	Non-primary surgical procedure to distant site	No radiation and/or cancer-directed surgery	Not recommended	None	Blank(s)	Blank(s)	Blank(s)	Blank(s)	Blank(s)	45	300	200	40	0	998	Blank(s)
215	65	1944	2010	Female	White	C34.2-Middle lobe, lung	8013/3: Large cell neuroendocrine carcinoma	Poorly differentiated; Grade III	8.3 Carcinoma of trachea,bronchus, and lung	Unclassified	XI(f) Other and unspecified carcinomas	Right - origin of primary	Positive histology	IA	IA	Blank(s)	Blank(s)	T1a	N0	M0	T1	N0	M0	Blank(s)	Blank(s)	Blank(s)	L	L	Localized	Blank(s)	Blank(s)	33	1 to 3 regional lymph nodes removed	None; diagnosed at autopsy	No radiation and/or cancer-directed surgery	Surgery performed	None	Blank(s)	Blank(s)	Blank(s)	Blank(s)	Blank(s)	15	100	0	0	0	999	Blank(s)
216	71	1938	2010	Female	White	C34.1-Upper lobe, lung	8013/3: Large cell neuroendocrine carcinoma	Poorly differentiated; Grade III	8.3 Carcinoma of trachea,bronchus, and lung	Unclassified	XI(f) Other and unspecified carcinomas	Left - origin of primary	Positive histology	IV	IV	Blank(s)	Blank(s)	T4	N2	M1a	T4	N2	M1	Blank(s)	Blank(s)	Blank(s)	D	D	Distant	Blank(s)	Blank(s)	0	None	Non-primary surgical procedure to distant lymph node(s)	No radiation and/or cancer-directed surgery	Recommended but not performed, unknown reason	None	Blank(s)	Blank(s)	Blank(s)	Blank(s)	Blank(s)	12	700	200	26	20	998	Blank(s)
217	56	1953	2010	Female	Black	C34.2-Middle lobe, lung	8013/3: Large cell neuroendocrine carcinoma	Unknown	8.3 Carcinoma of trachea,bronchus, and lung	Unclassified	XI(f) Other and unspecified carcinomas	Right - origin of primary	Positive histology	IV	IV	Blank(s)	Blank(s)	T1b	N1	M1b	T1	N1	M1	Blank(s)	Blank(s)	Blank(s)	D	D	Distant	Blank(s)	Blank(s)	0	None	None; diagnosed at autopsy	No radiation and/or cancer-directed surgery	Not recommended	None	Blank(s)	Blank(s)	Blank(s)	Blank(s)	Blank(s)	27	100	100	40	0	998	Blank(s)
218	64	1945	2010	Male	White	C34.1-Upper lobe, lung	8013/3: Large cell neuroendocrine carcinoma	Poorly differentiated; Grade III	8.3 Carcinoma of trachea,bronchus, and lung	Unclassified	XI(f) Other and unspecified carcinomas	Right - origin of primary	Positive histology	IIIA	IIIA	Blank(s)	Blank(s)	T3	N1	M0	T3	N1	M0	Blank(s)	Blank(s)	Blank(s)	D	RE+RN	Regional	Blank(s)	Blank(s)	55	4 or more regional lymph nodes removed	None; diagnosed at autopsy	Radiation after surgery	Surgery performed	Beam radiation	Blank(s)	Blank(s)	Blank(s)	Blank(s)	Blank(s)	15	600	100	0	0	40	Blank(s)
219	68	1942	2010	Male	White	C34.3-Lower lobe, lung	8013/3: Large cell neuroendocrine carcinoma	Poorly differentiated; Grade III	8.3 Carcinoma of trachea,bronchus, and lung	Unclassified	XI(f) Other and unspecified carcinomas	Right - origin of primary	Positive exfoliative cytology, no positive histology	IV	IV	Blank(s)	Blank(s)	T4	N3	M1b	T4	N3	M1	Blank(s)	Blank(s)	Blank(s)	D	D	Distant	Blank(s)	Blank(s)	0	Biopsy or aspiration of regional lymph node, NOS	Non-primary surgical procedure to distant lymph node(s)	No radiation and/or cancer-directed surgery	Not recommended	None	Blank(s)	Blank(s)	Blank(s)	Blank(s)	Blank(s)	999	999	600	40	30	40	Blank(s)
220	61	1949	2011	Male	Other (American Indian/AK Native, Asian/Pacific Islander)	C34.3-Lower lobe, lung	8013/3: Large cell neuroendocrine carcinoma	Poorly differentiated; Grade III	8.3 Carcinoma of trachea,bronchus, and lung	Unclassified	XI(f) Other and unspecified carcinomas	Left - origin of primary	Positive histology	IA	IA	Blank(s)	Blank(s)	T1a	N0	M0	T1	N0	M0	Blank(s)	Blank(s)	Blank(s)	L	L	Localized	Blank(s)	Blank(s)	33	1 to 3 regional lymph nodes removed	None; diagnosed at autopsy	No radiation and/or cancer-directed surgery	Surgery performed	None	Blank(s)	Blank(s)	Blank(s)	Blank(s)	Blank(s)	10	100	0	0	0	0	Blank(s)
221	86	1925	2012	Female	White	C34.1-Upper lobe, lung	8013/3: Large cell neuroendocrine carcinoma	Poorly differentiated; Grade III	8.3 Carcinoma of trachea,bronchus, and lung	Unclassified	XI(f) Other and unspecified carcinomas	Right - origin of primary	Positive histology	IA	IA	Blank(s)	Blank(s)	T1a	N0	M0	T1	N0	M0	Blank(s)	Blank(s)	Blank(s)	L	L	Localized	Blank(s)	Blank(s)	33	Number of regional lymph nodes removed unknown	None; diagnosed at autopsy	No radiation and/or cancer-directed surgery	Surgery performed	None	Blank(s)	Blank(s)	Blank(s)	Blank(s)	Blank(s)	12	300	0	0	0	0	Blank(s)
222	77	1933	2010	Female	White	C34.1-Upper lobe, lung	8013/3: Large cell neuroendocrine carcinoma	Unknown	8.3 Carcinoma of trachea,bronchus, and lung	Unclassified	XI(f) Other and unspecified carcinomas	Right - origin of primary	Positive histology	IIIB	IV	Blank(s)	Blank(s)	T4	N3	M0	T4	N3	M1	Blank(s)	Blank(s)	Blank(s)	D	D	Distant	Blank(s)	Blank(s)	0	None	None; diagnosed at autopsy	No radiation and/or cancer-directed surgery	Not recommended	Beam radiation	Blank(s)	Blank(s)	Blank(s)	Blank(s)	Blank(s)	41	700	600	0	30	998	Blank(s)
223	64	1945	2010	Male	White	C34.3-Lower lobe, lung	8013/3: Large cell neuroendocrine carcinoma	Poorly differentiated; Grade III	8.3 Carcinoma of trachea,bronchus, and lung	Unclassified	XI(f) Other and unspecified carcinomas	Right - origin of primary	Positive histology	IV	IV	Blank(s)	Blank(s)	T2b	N2	M1b	T2	N2	M1	Blank(s)	Blank(s)	Blank(s)	D	D	Distant	Blank(s)	Blank(s)	0	None	Non-primary surgical procedure to distant site	No radiation and/or cancer-directed surgery	Not recommended	None	Blank(s)	Blank(s)	Blank(s)	Blank(s)	Blank(s)	59	460	200	40	0	998	Blank(s)
224	46	1963	2010	Female	White	C34.9-Lung, NOS	8013/3: Large cell neuroendocrine carcinoma	Poorly differentiated; Grade III	8.3 Carcinoma of trachea,bronchus, and lung	Unclassified	XI(f) Other and unspecified carcinomas	Right - origin of primary	Positive histology	IV	IV	Blank(s)	Blank(s)	T4	N3	M1b	T4	N3	M1	Blank(s)	Blank(s)	Blank(s)	D	D	Distant	Blank(s)	Blank(s)	0	None	None; diagnosed at autopsy	No radiation and/or cancer-directed surgery	Not recommended	Beam radiation	Blank(s)	Blank(s)	Blank(s)	Blank(s)	Blank(s)	56	700	600	40	20	998	Blank(s)
225	65	1945	2010	Female	White	C34.1-Upper lobe, lung	8013/3: Large cell neuroendocrine carcinoma	Poorly differentiated; Grade III	8.3 Carcinoma of trachea,bronchus, and lung	Unclassified	XI(f) Other and unspecified carcinomas	Right - origin of primary	Positive histology	IIA	IIB	Blank(s)	Blank(s)	T2a	N1	M0	T2	N1	M0	Blank(s)	Blank(s)	Blank(s)	RN	RN	Regional	Blank(s)	Blank(s)	33	4 or more regional lymph nodes removed	None; diagnosed at autopsy	Radiation prior to surgery	Surgery performed	Beam radiation	Blank(s)	Blank(s)	Blank(s)	Blank(s)	Blank(s)	47	100	100	0	0	0	Blank(s)
226	65	1944	2010	Male	White	C34.3-Lower lobe, lung	8013/3: Large cell neuroendocrine carcinoma	Poorly differentiated; Grade III	8.3 Carcinoma of trachea,bronchus, and lung	Unclassified	XI(f) Other and unspecified carcinomas	Right - origin of primary	Positive exfoliative cytology, no positive histology	IV	IV	Blank(s)	Blank(s)	T4	N2	M1a	T4	N2	M1	Blank(s)	Blank(s)	Blank(s)	D	D	Distant	Blank(s)	Blank(s)	0	None	None; diagnosed at autopsy	No radiation and/or cancer-directed surgery	Not recommended	None	Blank(s)	Blank(s)	Blank(s)	Blank(s)	Blank(s)	70	700	200	23	30	999	Blank(s)
227	63	1947	2010	Male	White	C34.3-Lower lobe, lung	8013/3: Large cell neuroendocrine carcinoma	Poorly differentiated; Grade III	8.3 Carcinoma of trachea,bronchus, and lung	Unclassified	XI(f) Other and unspecified carcinomas	Left - origin of primary	Positive histology	IIA	IIB	Blank(s)	Blank(s)	T2a	N1	M0	T2	N1	M0	Blank(s)	Blank(s)	Blank(s)	RE+RN	RE+RN	Regional	Blank(s)	Blank(s)	30	4 or more regional lymph nodes removed	None; diagnosed at autopsy	No radiation and/or cancer-directed surgery	Surgery performed	None	Blank(s)	Blank(s)	Blank(s)	Blank(s)	Blank(s)	14	455	100	0	0	20	Blank(s)
228	49	1960	2010	Female	Black	C34.1-Upper lobe, lung	8013/3: Large cell neuroendocrine carcinoma	Unknown	8.3 Carcinoma of trachea,bronchus, and lung	Unclassified	XI(f) Other and unspecified carcinomas	Right - origin of primary	Positive histology	IV	IV	Blank(s)	Blank(s)	T1a	N0	M1b	T1	N0	M1	Blank(s)	Blank(s)	Blank(s)	D	D	Distant	Blank(s)	Blank(s)	30	4 or more regional lymph nodes removed	None; diagnosed at autopsy	No radiation and/or cancer-directed surgery	Surgery performed	None	Blank(s)	Blank(s)	Blank(s)	Blank(s)	Blank(s)	15	100	0	40	0	0	Blank(s)
229	52	1957	2010	Female	Black	C34.1-Upper lobe, lung	8013/3: Large cell neuroendocrine carcinoma	Poorly differentiated; Grade III	8.3 Carcinoma of trachea,bronchus, and lung	Unclassified	XI(f) Other and unspecified carcinomas	Right - origin of primary	Positive histology	IB	IB	Blank(s)	Blank(s)	T2a	N0	M0	T2	N0	M0	Blank(s)	Blank(s)	Blank(s)	RE	RE	Regional	Blank(s)	Blank(s)	33	4 or more regional lymph nodes removed	None; diagnosed at autopsy	No radiation and/or cancer-directed surgery	Surgery performed	None	Blank(s)	Blank(s)	Blank(s)	Blank(s)	Blank(s)	18	430	0	0	0	20	Blank(s)
230	68	1941	2010	Male	Black	C34.1-Upper lobe, lung	8013/3: Large cell neuroendocrine carcinoma	Poorly differentiated; Grade III	8.3 Carcinoma of trachea,bronchus, and lung	Unclassified	XI(f) Other and unspecified carcinomas	Right - origin of primary	Positive histology	IA	IA	Blank(s)	Blank(s)	T1a	N0	M0	T1	N0	M0	Blank(s)	Blank(s)	Blank(s)	L	L	Localized	Blank(s)	Blank(s)	30	4 or more regional lymph nodes removed	None; diagnosed at autopsy	No radiation and/or cancer-directed surgery	Surgery performed	None	Blank(s)	Blank(s)	Blank(s)	Blank(s)	Blank(s)	10	100	0	0	0	0	Blank(s)
231	66	1943	2010	Male	White	C34.1-Upper lobe, lung	8013/3: Large cell neuroendocrine carcinoma	Undifferentiated; anaplastic; Grade IV	8.3 Carcinoma of trachea,bronchus, and lung	Unclassified	XI(f) Other and unspecified carcinomas	Right - origin of primary	Positive histology	IV	IV	Blank(s)	Blank(s)	T2a	N0	M1b	T2	N0	M1	Blank(s)	Blank(s)	Blank(s)	D	D	Distant	Blank(s)	Blank(s)	33	4 or more regional lymph nodes removed	Non-primary surgical procedure to distant site	Radiation before and after surgery	Surgery performed	Beam radiation	Blank(s)	Blank(s)	Blank(s)	Blank(s)	Blank(s)	30	420	0	70	0	40	Blank(s)
232	60	1950	2010	Male	Black	C34.2-Middle lobe, lung	8013/3: Large cell neuroendocrine carcinoma	Unknown	8.3 Carcinoma of trachea,bronchus, and lung	Unclassified	XI(f) Other and unspecified carcinomas	Right - origin of primary	Positive histology	IV	IV	Blank(s)	Blank(s)	T4	N3	M1b	T4	N3	M1	Blank(s)	Blank(s)	Blank(s)	D	D	Distant	Blank(s)	Blank(s)	0	None	None; diagnosed at autopsy	No radiation and/or cancer-directed surgery	Not recommended	Beam radiation	Blank(s)	Blank(s)	Blank(s)	Blank(s)	Blank(s)	50	700	600	42	0	0	Blank(s)
233	47	1963	2010	Male	White	C34.3-Lower lobe, lung	8013/3: Large cell neuroendocrine carcinoma	Unknown	8.3 Carcinoma of trachea,bronchus, and lung	Unclassified	XI(f) Other and unspecified carcinomas	Left - origin of primary	Positive histology	IV	IV	Blank(s)	Blank(s)	T1a	N0	M1b	T1	N0	M1	Blank(s)	Blank(s)	Blank(s)	D	D	Distant	Blank(s)	Blank(s)	0	None	None; diagnosed at autopsy	No radiation and/or cancer-directed surgery	Not recommended	None	Blank(s)	Blank(s)	Blank(s)	Blank(s)	Blank(s)	24	110	0	40	0	998	Blank(s)
234	70	1939	2010	Female	White	C34.1-Upper lobe, lung	8013/3: Large cell neuroendocrine carcinoma	Unknown	8.3 Carcinoma of trachea,bronchus, and lung	Unclassified	XI(f) Other and unspecified carcinomas	Left - origin of primary	Positive histology	IIB	UNK Stage	Blank(s)	Blank(s)	T3	N0	M0	T3	N0	MX	Blank(s)	Blank(s)	Blank(s)	D	RE	Regional	Blank(s)	Blank(s)	33	Number of regional lymph nodes removed unknown	None; diagnosed at autopsy	No radiation and/or cancer-directed surgery	Surgery performed	None	Blank(s)	Blank(s)	Blank(s)	Blank(s)	Blank(s)	20	600	0	99	0	30	Blank(s)
235	66	1943	2010	Female	White	C34.2-Middle lobe, lung	8013/3: Large cell neuroendocrine carcinoma	Poorly differentiated; Grade III	8.3 Carcinoma of trachea,bronchus, and lung	Unclassified	XI(f) Other and unspecified carcinomas	Right - origin of primary	Positive histology	IV	IV	Blank(s)	Blank(s)	TX	N2	M1b	TX	N2	M1	Blank(s)	Blank(s)	Blank(s)	D	D	Distant	Blank(s)	Blank(s)	0	None	None; diagnosed at autopsy	No radiation and/or cancer-directed surgery	Not recommended	None	Blank(s)	Blank(s)	Blank(s)	Blank(s)	Blank(s)	31	999	200	40	0	998	Blank(s)
236	56	1955	2011	Male	Unknown	C34.1-Upper lobe, lung	8013/3: Large cell neuroendocrine carcinoma	Poorly differentiated; Grade III	8.3 Carcinoma of trachea,bronchus, and lung	Unclassified	XI(f) Other and unspecified carcinomas	Right - origin of primary	Positive histology	IA	IA	Blank(s)	Blank(s)	T1a	N0	M0	T1	N0	M0	Blank(s)	Blank(s)	Blank(s)	L	L	Localized	Blank(s)	Blank(s)	33	4 or more regional lymph nodes removed	None; diagnosed at autopsy	No radiation and/or cancer-directed surgery	Surgery performed	None	Blank(s)	Blank(s)	Blank(s)	Blank(s)	Blank(s)	12	100	0	0	0	0	Blank(s)
237	54	1957	2011	Male	Black	C34.1-Upper lobe, lung	8013/3: Large cell neuroendocrine carcinoma	Poorly differentiated; Grade III	8.3 Carcinoma of trachea,bronchus, and lung	Unclassified	XI(f) Other and unspecified carcinomas	Left - origin of primary	Positive exfoliative cytology, no positive histology	IIIA	IIIA	Blank(s)	Blank(s)	T3	N1	M0	T3	N1	M0	Blank(s)	Blank(s)	Blank(s)	RE+RN	RE+RN	Regional	Blank(s)	Blank(s)	56	4 or more regional lymph nodes removed	None; diagnosed at autopsy	No radiation and/or cancer-directed surgery	Surgery performed	None	Blank(s)	Blank(s)	Blank(s)	Blank(s)	Blank(s)	95	570	100	0	0	0	Blank(s)
238	67	1943	2011	Male	White	C34.3-Lower lobe, lung	8013/3: Large cell neuroendocrine carcinoma	Unknown	8.3 Carcinoma of trachea,bronchus, and lung	Unclassified	XI(f) Other and unspecified carcinomas	Left - origin of primary	Positive histology	IV	IV	Blank(s)	Blank(s)	TX	N3	M1b	TX	N3	M1	Blank(s)	Blank(s)	Blank(s)	D	D	Distant	Blank(s)	Blank(s)	0	None	None; diagnosed at autopsy	No radiation and/or cancer-directed surgery	Not recommended	Beam radiation	Blank(s)	Blank(s)	Blank(s)	Blank(s)	Blank(s)	999	999	600	40	999	998	Blank(s)
239	58	1952	2011	Male	White	C34.1-Upper lobe, lung	8013/3: Large cell neuroendocrine carcinoma	Unknown	8.3 Carcinoma of trachea,bronchus, and lung	Unclassified	XI(f) Other and unspecified carcinomas	Left - origin of primary	Positive histology	IV	IV	Blank(s)	Blank(s)	T1NOS	N2	M1b	T1	N2	M1	Blank(s)	Blank(s)	Blank(s)	D	D	Distant	Blank(s)	Blank(s)	0	None	Non-primary surgical procedure to distant site	Radiation after surgery	Not recommended	Beam radiation	Blank(s)	Blank(s)	Blank(s)	Blank(s)	Blank(s)	13	125	200	40	999	998	Blank(s)
240	68	1943	2011	Male	White	C34.9-Lung, NOS	8013/3: Large cell neuroendocrine carcinoma	Unknown	8.3 Carcinoma of trachea,bronchus, and lung	Unclassified	XI(f) Other and unspecified carcinomas	Paired site, but no information concerning laterality	Positive histology	IV	IV	Blank(s)	Blank(s)	T4	N2	M1b	T4	N2	M1	Blank(s)	Blank(s)	Blank(s)	D	D	Distant	Blank(s)	Blank(s)	0	None	None; diagnosed at autopsy	No radiation and/or cancer-directed surgery	Not recommended	None	Blank(s)	Blank(s)	Blank(s)	Blank(s)	Blank(s)	998	700	200	40	20	998	Blank(s)
241	75	1935	2011	Male	White	C34.1-Upper lobe, lung	8013/3: Large cell neuroendocrine carcinoma	Poorly differentiated; Grade III	8.3 Carcinoma of trachea,bronchus, and lung	Unclassified	XI(f) Other and unspecified carcinomas	Left - origin of primary	Positive histology	IV	IV	Blank(s)	Blank(s)	T1a	N2	M1b	T1	N2	M1	Blank(s)	Blank(s)	Blank(s)	D	D	Distant	Blank(s)	Blank(s)	0	None	None; diagnosed at autopsy	No radiation and/or cancer-directed surgery	Not recommended	None	Blank(s)	Blank(s)	Blank(s)	Blank(s)	Blank(s)	17	300	200	40	0	998	Blank(s)
242	43	1967	2011	Male	White	C34.1-Upper lobe, lung	8013/3: Large cell neuroendocrine carcinoma	Unknown	8.3 Carcinoma of trachea,bronchus, and lung	Unclassified	XI(f) Other and unspecified carcinomas	Right - origin of primary	Positive exfoliative cytology, no positive histology	IIIA	IIIA	Blank(s)	Blank(s)	T1a	N2	M0	T1	N2	M0	Blank(s)	Blank(s)	Blank(s)	RN	RN	Regional	Blank(s)	Blank(s)	0	None	None; diagnosed at autopsy	No radiation and/or cancer-directed surgery	Not recommended	Beam radiation	Blank(s)	Blank(s)	Blank(s)	Blank(s)	Blank(s)	14	115	200	0	0	998	Blank(s)
243	57	1954	2011	Female	Black	C34.1-Upper lobe, lung	8013/3: Large cell neuroendocrine carcinoma	Unknown	8.3 Carcinoma of trachea,bronchus, and lung	Unclassified	XI(f) Other and unspecified carcinomas	Left - origin of primary	Positive histology	IV	IV	Blank(s)	Blank(s)	T4	N2	M1b	T4	N2	M1	Blank(s)	Blank(s)	Blank(s)	D	D	Distant	Blank(s)	Blank(s)	0	None	None; diagnosed at autopsy	No radiation and/or cancer-directed surgery	Not recommended	Beam radiation	Blank(s)	Blank(s)	Blank(s)	Blank(s)	Blank(s)	96	810	200	40	0	998	Blank(s)
244	59	1952	2011	Male	Black	C34.1-Upper lobe, lung	8013/3: Large cell neuroendocrine carcinoma	Unknown	8.3 Carcinoma of trachea,bronchus, and lung	Unclassified	XI(f) Other and unspecified carcinomas	Right - origin of primary	Positive histology	IV	IV	Blank(s)	Blank(s)	TX	N2	M1b	TX	N2	M1	Blank(s)	Blank(s)	Blank(s)	D	D	Distant	Blank(s)	Blank(s)	0	None	None; diagnosed at autopsy	No radiation and/or cancer-directed surgery	Not recommended	None	Blank(s)	Blank(s)	Blank(s)	Blank(s)	Blank(s)	999	999	200	40	999	998	Blank(s)
245	78	1933	2011	Male	White	C34.9-Lung, NOS	8013/3: Large cell neuroendocrine carcinoma	Unknown	8.3 Carcinoma of trachea,bronchus, and lung	Unclassified	XI(f) Other and unspecified carcinomas	Right - origin of primary	Positive histology	IV	IV	Blank(s)	Blank(s)	T4	N2	M1b	TX	N2	M1	Blank(s)	Blank(s)	Blank(s)	D	D	Distant	Blank(s)	Blank(s)	0	None	None; diagnosed at autopsy	No radiation and/or cancer-directed surgery	Not recommended	None	Blank(s)	Blank(s)	Blank(s)	Blank(s)	Blank(s)	999	999	200	51	20	40	Blank(s)
246	77	1935	2012	Female	White	C34.3-Lower lobe, lung	8013/3: Large cell neuroendocrine carcinoma	Unknown	8.3 Carcinoma of trachea,bronchus, and lung	Unclassified	XI(f) Other and unspecified carcinomas	Left - origin of primary	Positive histology	IA	IA	Blank(s)	Blank(s)	T1a	N0	M0	T1	N0	M0	Blank(s)	Blank(s)	Blank(s)	L	L	Localized	Blank(s)	Blank(s)	33	4 or more regional lymph nodes removed	None; diagnosed at autopsy	No radiation and/or cancer-directed surgery	Surgery performed	None	Blank(s)	Blank(s)	Blank(s)	Blank(s)	Blank(s)	16	115	0	0	0	0	Blank(s)
247	31	1979	2011	Female	Black	C34.3-Lower lobe, lung	8013/3: Large cell neuroendocrine carcinoma	Poorly differentiated; Grade III	8.3 Carcinoma of trachea,bronchus, and lung	Unclassified	XI(f) Other and unspecified carcinomas	Left - origin of primary	Positive histology	IV	IV	Blank(s)	Blank(s)	T2a	N1	M1b	T2	N1	M1	Blank(s)	Blank(s)	Blank(s)	D	D	Distant	Blank(s)	Blank(s)	30	1 to 3 regional lymph nodes removed	None; diagnosed at autopsy	No radiation and/or cancer-directed surgery	Surgery performed	None	Blank(s)	Blank(s)	Blank(s)	Blank(s)	Blank(s)	39	455	100	40	0	0	Blank(s)
248	68	1943	2012	Female	White	C34.3-Lower lobe, lung	8013/3: Large cell neuroendocrine carcinoma	Undifferentiated; anaplastic; Grade IV	8.3 Carcinoma of trachea,bronchus, and lung	Unclassified	XI(f) Other and unspecified carcinomas	Left - origin of primary	Positive histology	IA	IA	Blank(s)	Blank(s)	T1a	N0	M0	T1	N0	M0	Blank(s)	Blank(s)	Blank(s)	L	L	Localized	Blank(s)	Blank(s)	22	Number of regional lymph nodes removed unknown	None; diagnosed at autopsy	No radiation and/or cancer-directed surgery	Surgery performed	None	Blank(s)	Blank(s)	Blank(s)	Blank(s)	Blank(s)	18	100	0	0	0	0	Blank(s)
249	54	1956	2011	Male	White	C34.9-Lung, NOS	8013/3: Large cell neuroendocrine carcinoma	Unknown	8.3 Carcinoma of trachea,bronchus, and lung	Unclassified	XI(f) Other and unspecified carcinomas	Right - origin of primary	Positive histology	IV	IV	Blank(s)	Blank(s)	TX	N2	M1b	TX	N2	M1	Blank(s)	Blank(s)	Blank(s)	D	D	Distant	Blank(s)	Blank(s)	0	Biopsy or aspiration of regional lymph node, NOS	None; diagnosed at autopsy	No radiation and/or cancer-directed surgery	Not recommended	None	Blank(s)	Blank(s)	Blank(s)	Blank(s)	Blank(s)	55	999	200	40	999	998	Blank(s)
250	64	1947	2012	Male	White	C34.3-Lower lobe, lung	8013/3: Large cell neuroendocrine carcinoma	Undifferentiated; anaplastic; Grade IV	8.3 Carcinoma of trachea,bronchus, and lung	Unclassified	XI(f) Other and unspecified carcinomas	Right - origin of primary	Positive histology	IV	IIIB	Blank(s)	Blank(s)	T4	N2	M1a	T4	N2	M0	Blank(s)	Blank(s)	Blank(s)	D	D	Distant	Blank(s)	Blank(s)	0	None	None; diagnosed at autopsy	No radiation and/or cancer-directed surgery	Not recommended	Refused	Blank(s)	Blank(s)	Blank(s)	Blank(s)	Blank(s)	50	810	200	20	0	998	Blank(s)
251	54	1958	2012	Female	White	C34.1-Upper lobe, lung	8013/3: Large cell neuroendocrine carcinoma	Undifferentiated; anaplastic; Grade IV	8.3 Carcinoma of trachea,bronchus, and lung	Unclassified	XI(f) Other and unspecified carcinomas	Right - origin of primary	Positive histology	IIB	IIIB	Blank(s)	Blank(s)	T3	N0	M0	T4	N0	M0	Blank(s)	Blank(s)	Blank(s)	L	RE	Regional	Blank(s)	Blank(s)	33	4 or more regional lymph nodes removed	None; diagnosed at autopsy	No radiation and/or cancer-directed surgery	Surgery performed	None	Blank(s)	Blank(s)	Blank(s)	Blank(s)	Blank(s)	32	100	0	0	10	0	Blank(s)
252	73	1938	2012	Female	Black	C34.1-Upper lobe, lung	8013/3: Large cell neuroendocrine carcinoma	Unknown	8.3 Carcinoma of trachea,bronchus, and lung	Unclassified	XI(f) Other and unspecified carcinomas	Left - origin of primary	Positive histology	IIIB	IIIB	Blank(s)	Blank(s)	TX	N3	M0	TX	N3	M0	Blank(s)	Blank(s)	Blank(s)	D	D	Distant	Blank(s)	Blank(s)	0	None	None; diagnosed at autopsy	No radiation and/or cancer-directed surgery	Not recommended	Recommended, unknown if administered	Blank(s)	Blank(s)	Blank(s)	Blank(s)	Blank(s)	10	999	600	0	999	998	Blank(s)
253	64	1948	2012	Male	White	C34.3-Lower lobe, lung	8013/3: Large cell neuroendocrine carcinoma	Poorly differentiated; Grade III	8.3 Carcinoma of trachea,bronchus, and lung	Unclassified	XI(f) Other and unspecified carcinomas	Right - origin of primary	Positive histology	IIA	IIB	Blank(s)	Blank(s)	T2a	N1	M0	T2	N1	M0	Blank(s)	Blank(s)	Blank(s)	RN	RN	Regional	Blank(s)	Blank(s)	45	4 or more regional lymph nodes removed	None; diagnosed at autopsy	No radiation and/or cancer-directed surgery	Surgery performed	None	Blank(s)	Blank(s)	Blank(s)	Blank(s)	Blank(s)	35	100	100	0	0	0	Blank(s)
254	64	1948	2012	Male	White	C34.1-Upper lobe, lung	8013/3: Large cell neuroendocrine carcinoma	Unknown	8.3 Carcinoma of trachea,bronchus, and lung	Unclassified	XI(f) Other and unspecified carcinomas	Right - origin of primary	Positive histology	IV	IV	Blank(s)	Blank(s)	T4	N3	M1b	T4	N3	M1	Blank(s)	Blank(s)	Blank(s)	D	D	Distant	Blank(s)	Blank(s)	0	None	None; diagnosed at autopsy	No radiation and/or cancer-directed surgery	Not recommended	None	Blank(s)	Blank(s)	Blank(s)	Blank(s)	Blank(s)	66	550	600	42	30	998	Blank(s)
255	82	1929	2012	Female	White	C34.1-Upper lobe, lung	8013/3: Large cell neuroendocrine carcinoma	Unknown	8.3 Carcinoma of trachea,bronchus, and lung	Unclassified	XI(f) Other and unspecified carcinomas	Left - origin of primary	Positive histology	IIIB	IV	Blank(s)	Blank(s)	T4	N2	M0	T4	N2	M1	Blank(s)	Blank(s)	Blank(s)	RE+RN	D	Distant	Blank(s)	Blank(s)	0	None	None; diagnosed at autopsy	No radiation and/or cancer-directed surgery	Not recommended	None	Blank(s)	Blank(s)	Blank(s)	Blank(s)	Blank(s)	999	700	200	0	20	998	Blank(s)
256	55	1956	2012	Female	White	C34.1-Upper lobe, lung	8013/3: Large cell neuroendocrine carcinoma	Poorly differentiated; Grade III	8.3 Carcinoma of trachea,bronchus, and lung	Unclassified	XI(f) Other and unspecified carcinomas	Left - origin of primary	Positive histology	IIIB	IV	Blank(s)	Blank(s)	T4	N2	M0	T1	N2	M1	Blank(s)	Blank(s)	Blank(s)	RN	D	Distant	Blank(s)	Blank(s)	0	Biopsy or aspiration of regional lymph node, NOS	None; diagnosed at autopsy	Radiation after surgery	Not recommended	Beam radiation	Blank(s)	Blank(s)	Blank(s)	Blank(s)	Blank(s)	25	100	200	0	20	998	Blank(s)
257	64	1947	2012	Male	White	C34.9-Lung, NOS	8013/3: Large cell neuroendocrine carcinoma	Undifferentiated; anaplastic; Grade IV	8.3 Carcinoma of trachea,bronchus, and lung	Unclassified	XI(f) Other and unspecified carcinomas	Left - origin of primary	Positive histology	IIIB	IV	Blank(s)	Blank(s)	T4	N3	M0	T4	N3	M1	Blank(s)	Blank(s)	Blank(s)	D	D	Distant	Blank(s)	Blank(s)	23	Biopsy or aspiration of regional lymph node, NOS	None; diagnosed at autopsy	Radiation after surgery	Surgery performed	Beam radiation	Blank(s)	Blank(s)	Blank(s)	Blank(s)	Blank(s)	999	700	600	0	20	998	Blank(s)
258	47	1964	2012	Male	White	C34.9-Lung, NOS	8013/3: Large cell neuroendocrine carcinoma	Unknown	8.3 Carcinoma of trachea,bronchus, and lung	Unclassified	XI(f) Other and unspecified carcinomas	Right - origin of primary	Positive histology	IV	IV	Blank(s)	Blank(s)	T4	N3	M1NOS	T4	N3	M1	Blank(s)	Blank(s)	Blank(s)	D	D	Distant	Blank(s)	Blank(s)	0	None	None; diagnosed at autopsy	No radiation and/or cancer-directed surgery	Not recommended	Beam radiation	Blank(s)	Blank(s)	Blank(s)	Blank(s)	Blank(s)	999	810	600	75	0	998	Blank(s)
259	55	1956	2012	Male	White	C34.2-Middle lobe, lung	8013/3: Large cell neuroendocrine carcinoma	Poorly differentiated; Grade III	8.3 Carcinoma of trachea,bronchus, and lung	Unclassified	XI(f) Other and unspecified carcinomas	Right - origin of primary	Positive histology	IIA	IIB	Blank(s)	Blank(s)	T2a	N1	M0	T2	N1	M0	Blank(s)	Blank(s)	Blank(s)	RE+RN	RE+RN	Regional	Blank(s)	Blank(s)	0	Biopsy or aspiration of regional lymph node, NOS	None; diagnosed at autopsy	No radiation and/or cancer-directed surgery	Not recommended	None	Blank(s)	Blank(s)	Blank(s)	Blank(s)	Blank(s)	32	400	100	0	0	998	Blank(s)
260	68	1943	2012	Male	White	C34.3-Lower lobe, lung	8013/3: Large cell neuroendocrine carcinoma	Undifferentiated; anaplastic; Grade IV	8.3 Carcinoma of trachea,bronchus, and lung	Unclassified	XI(f) Other and unspecified carcinomas	Right - origin of primary	Positive histology	IV	IIIB	Blank(s)	Blank(s)	T4	N2	M1a	T4	N2	M0	Blank(s)	Blank(s)	Blank(s)	D	D	Distant	Blank(s)	Blank(s)	0	None	None; diagnosed at autopsy	No radiation and/or cancer-directed surgery	Not recommended	None	Blank(s)	Blank(s)	Blank(s)	Blank(s)	Blank(s)	34	700	200	15	0	998	Blank(s)
261	63	1949	2012	Male	White	C34.1-Upper lobe, lung	8013/3: Large cell neuroendocrine carcinoma	Poorly differentiated; Grade III	8.3 Carcinoma of trachea,bronchus, and lung	Unclassified	XI(f) Other and unspecified carcinomas	Right - origin of primary	Positive histology	IIA	IIA	Blank(s)	Blank(s)	T1a	N1	M0	T1	N1	M0	Blank(s)	Blank(s)	Blank(s)	RN	RN	Regional	Blank(s)	Blank(s)	33	4 or more regional lymph nodes removed	None; diagnosed at autopsy	No radiation and/or cancer-directed surgery	Surgery performed	None	Blank(s)	Blank(s)	Blank(s)	Blank(s)	Blank(s)	20	100	100	0	0	0	Blank(s)
262	68	1944	2012	Male	White	C34.1-Upper lobe, lung	8013/3: Large cell neuroendocrine carcinoma	Unknown	8.3 Carcinoma of trachea,bronchus, and lung	Unclassified	XI(f) Other and unspecified carcinomas	Right - origin of primary	Positive histology	IV	IV	Blank(s)	Blank(s)	T1b	N0	M1NOS	T1	N0	M1	Blank(s)	Blank(s)	Blank(s)	D	D	Distant	Blank(s)	Blank(s)	0	None	None; diagnosed at autopsy	No radiation and/or cancer-directed surgery	Not recommended, contraindicated due to other cond; autopsy only (1973-2002)	None	Blank(s)	Blank(s)	Blank(s)	Blank(s)	Blank(s)	22	100	0	75	0	998	Blank(s)
263	49	1962	2012	Male	White	C34.1-Upper lobe, lung	8013/3: Large cell neuroendocrine carcinoma	Unknown	8.3 Carcinoma of trachea,bronchus, and lung	Unclassified	XI(f) Other and unspecified carcinomas	Right - origin of primary	Positive histology	IB	IB	Blank(s)	Blank(s)	T2a	N0	M0	T2	N0	M0	Blank(s)	Blank(s)	Blank(s)	RE	RE	Regional	Blank(s)	Blank(s)	33	Sentinel node biopsy and lym nd removed same/unstated time	None; diagnosed at autopsy	No radiation and/or cancer-directed surgery	Surgery performed	None	Blank(s)	Blank(s)	Blank(s)	Blank(s)	Blank(s)	25	455	0	0	0	20	Blank(s)
264	58	1954	2012	Female	White	C34.3-Lower lobe, lung	8013/3: Large cell neuroendocrine carcinoma	Unknown	8.3 Carcinoma of trachea,bronchus, and lung	Unclassified	XI(f) Other and unspecified carcinomas	Left - origin of primary	Positive histology	IV	IV	Blank(s)	Blank(s)	T2a	N3	M1b	T2	N3	M1	Blank(s)	Blank(s)	Blank(s)	D	D	Distant	Blank(s)	Blank(s)	0	None	None; diagnosed at autopsy	No radiation and/or cancer-directed surgery	Not recommended	Beam radiation	Blank(s)	Blank(s)	Blank(s)	Blank(s)	Blank(s)	50	400	600	40	999	998	Blank(s)
265	86	1926	2012	Male	White	C34.3-Lower lobe, lung	8013/3: Large cell neuroendocrine carcinoma	Unknown	8.3 Carcinoma of trachea,bronchus, and lung	Unclassified	XI(f) Other and unspecified carcinomas	Right - origin of primary	Positive histology	IV	IV	Blank(s)	Blank(s)	T4	N3	M1a	T1	N3	M1	Blank(s)	Blank(s)	Blank(s)	D	D	Distant	Blank(s)	Blank(s)	0	Biopsy or aspiration of regional lymph node, NOS	None; diagnosed at autopsy	No radiation and/or cancer-directed surgery	Not recommended	None	Blank(s)	Blank(s)	Blank(s)	Blank(s)	Blank(s)	18	100	600	25	20	998	Blank(s)
266	54	1958	2012	Male	White	C34.3-Lower lobe, lung	8013/3: Large cell neuroendocrine carcinoma	Unknown	8.3 Carcinoma of trachea,bronchus, and lung	Unclassified	XI(f) Other and unspecified carcinomas	Right - origin of primary	Positive histology	IV	IV	Blank(s)	Blank(s)	T2b	N2	M1b	T2	N2	M1	Blank(s)	Blank(s)	Blank(s)	D	D	Distant	Blank(s)	Blank(s)	0	None	None; diagnosed at autopsy	No radiation and/or cancer-directed surgery	Not recommended	Beam radiation	Blank(s)	Blank(s)	Blank(s)	Blank(s)	Blank(s)	52	410	200	40	0	998	Blank(s)
267	77	1935	2012	Female	White	C34.1-Upper lobe, lung	8013/3: Large cell neuroendocrine carcinoma	Unknown	8.3 Carcinoma of trachea,bronchus, and lung	Unclassified	XI(f) Other and unspecified carcinomas	Left - origin of primary	Positive histology	IA	IA	Blank(s)	Blank(s)	T1a	N0	M0	T1	N0	M0	Blank(s)	Blank(s)	Blank(s)	L	L	Localized	Blank(s)	Blank(s)	33	1 to 3 regional lymph nodes removed	None; diagnosed at autopsy	No radiation and/or cancer-directed surgery	Surgery performed	None	Blank(s)	Blank(s)	Blank(s)	Blank(s)	Blank(s)	20	100	0	0	0	0	Blank(s)
268	83	1929	2012	Female	White	C34.1-Upper lobe, lung	8013/3: Large cell neuroendocrine carcinoma	Poorly differentiated; Grade III	8.3 Carcinoma of trachea,bronchus, and lung	Unclassified	XI(f) Other and unspecified carcinomas	Right - origin of primary	Positive histology	IIIA	IIIB	Blank(s)	Blank(s)	T3	N2	M0	T4	N2	M0	Blank(s)	Blank(s)	Blank(s)	RE+RN	RE+RN	Regional	Blank(s)	Blank(s)	0	Biopsy or aspiration of regional lymph node, NOS	None; diagnosed at autopsy	No radiation and/or cancer-directed surgery	Not recommended	None	Blank(s)	Blank(s)	Blank(s)	Blank(s)	Blank(s)	999	570	200	0	10	998	Blank(s)
269	78	1934	2012	Female	White	C34.3-Lower lobe, lung	8013/3: Large cell neuroendocrine carcinoma	Unknown	8.3 Carcinoma of trachea,bronchus, and lung	Unclassified	XI(f) Other and unspecified carcinomas	Left - origin of primary	Positive histology	IV	IV	Blank(s)	Blank(s)	T4	N1	M1b	T4	N1	M1	Blank(s)	Blank(s)	Blank(s)	D	D	Distant	Blank(s)	Blank(s)	0	None	None; diagnosed at autopsy	No radiation and/or cancer-directed surgery	Not recommended	None	Blank(s)	Blank(s)	Blank(s)	Blank(s)	Blank(s)	61	750	100	42	999	999	Blank(s)
270	81	1931	2013	Female	White	C34.1-Upper lobe, lung	8013/3: Large cell neuroendocrine carcinoma	Poorly differentiated; Grade III	8.3 Carcinoma of trachea,bronchus, and lung	Unclassified	XI(f) Other and unspecified carcinomas	Left - origin of primary	Positive exfoliative cytology, no positive histology	IA	IA	Blank(s)	Blank(s)	T1a	N0	M0	T1	N0	M0	Blank(s)	Blank(s)	Blank(s)	L	L	Localized	Blank(s)	Blank(s)	33	1 to 3 regional lymph nodes removed	None; diagnosed at autopsy	No radiation and/or cancer-directed surgery	Surgery performed	None	Blank(s)	Blank(s)	Blank(s)	Blank(s)	Blank(s)	10	100	0	0	0	0	Blank(s)
271	55	1958	2013	Female	White	C34.3-Lower lobe, lung	8013/3: Large cell neuroendocrine carcinoma	Unknown	8.3 Carcinoma of trachea,bronchus, and lung	Unclassified	XI(f) Other and unspecified carcinomas	Left - origin of primary	Positive histology	IV	IV	Blank(s)	Blank(s)	T2a	N0	M1b	T2	N0	M1	Blank(s)	Blank(s)	Blank(s)	D	D	Distant	Blank(s)	Blank(s)	0	None	Non-primary surgical procedure to distant site	Radiation after surgery	Not recommended	Beam radiation	Blank(s)	Blank(s)	Blank(s)	Blank(s)	Blank(s)	32	100	0	40	0	998	Blank(s)
272	90	1922	2013	Female	White	C34.1-Upper lobe, lung	8013/3: Large cell neuroendocrine carcinoma	Unknown	8.3 Carcinoma of trachea,bronchus, and lung	Unclassified	XI(f) Other and unspecified carcinomas	Left - origin of primary	Positive histology	IV	IV	Blank(s)	Blank(s)	TX	NX	M1b	TX	NX	M1	Blank(s)	Blank(s)	Blank(s)	D	D	Distant	Blank(s)	Blank(s)	0	None	None; diagnosed at autopsy	No radiation and/or cancer-directed surgery	Not recommended	Beam radiation	Blank(s)	Blank(s)	Blank(s)	Blank(s)	Blank(s)	17	999	999	40	999	998	Blank(s)
273	52	1960	2013	Female	White	C34.3-Lower lobe, lung	8013/3: Large cell neuroendocrine carcinoma	Poorly differentiated; Grade III	8.3 Carcinoma of trachea,bronchus, and lung	Unclassified	XI(f) Other and unspecified carcinomas	Left - origin of primary	Positive histology	IA	IA	Blank(s)	Blank(s)	T1a	N0	M0	T1	N0	M0	Blank(s)	Blank(s)	Blank(s)	L	L	Localized	Blank(s)	Blank(s)	30	1 to 3 regional lymph nodes removed	None; diagnosed at autopsy	No radiation and/or cancer-directed surgery	Surgery performed	None	Blank(s)	Blank(s)	Blank(s)	Blank(s)	Blank(s)	18	100	0	0	0	0	Blank(s)
274	43	1970	2013	Female	White	C34.3-Lower lobe, lung	8013/3: Large cell neuroendocrine carcinoma	Poorly differentiated; Grade III	8.3 Carcinoma of trachea,bronchus, and lung	Unclassified	XI(f) Other and unspecified carcinomas	Right - origin of primary	Positive histology	IB	IB	Blank(s)	Blank(s)	T2a	N0	M0	T2	N0	M0	Blank(s)	Blank(s)	Blank(s)	L	L	Localized	Blank(s)	Blank(s)	33	4 or more regional lymph nodes removed	None; diagnosed at autopsy	No radiation and/or cancer-directed surgery	Surgery performed	None	Blank(s)	Blank(s)	Blank(s)	Blank(s)	Blank(s)	33	100	0	0	0	0	Blank(s)
275	88	1924	2013	Male	White	C34.9-Lung, NOS	8013/3: Large cell neuroendocrine carcinoma	Unknown	8.3 Carcinoma of trachea,bronchus, and lung	Unclassified	XI(f) Other and unspecified carcinomas	Paired site, but no information concerning laterality	Positive histology	UNK Stage	UNK Stage	Blank(s)	Blank(s)	TX	NX	M0	TX	NX	M0	Blank(s)	Blank(s)	Blank(s)	U	U	Unknown/unstaged	Blank(s)	Blank(s)	0	None	None; diagnosed at autopsy	No radiation and/or cancer-directed surgery	Not recommended	Beam radiation	Blank(s)	Blank(s)	Blank(s)	Blank(s)	Blank(s)	999	999	999	0	999	998	Blank(s)
276	67	1946	2013	Female	White	C34.1-Upper lobe, lung	8013/3: Large cell neuroendocrine carcinoma	Unknown	8.3 Carcinoma of trachea,bronchus, and lung	Unclassified	XI(f) Other and unspecified carcinomas	Left - origin of primary	Positive histology	IV	IV	Blank(s)	Blank(s)	T3	N0	M1b	T4	N0	M1	Blank(s)	Blank(s)	Blank(s)	D	D	Distant	Blank(s)	Blank(s)	0	None	Non-primary surgical procedure to distant site	Radiation after surgery	Not recommended	Beam radiation	Blank(s)	Blank(s)	Blank(s)	Blank(s)	Blank(s)	33	570	0	40	10	998	Blank(s)
277	78	1935	2013	Male	White	C34.1-Upper lobe, lung	8013/3: Large cell neuroendocrine carcinoma	Unknown	8.3 Carcinoma of trachea,bronchus, and lung	Unclassified	XI(f) Other and unspecified carcinomas	Right - origin of primary	Positive histology	IIA	IIB	Blank(s)	Blank(s)	T2a	N1	M0	T2	N1	M0	Blank(s)	Blank(s)	Blank(s)	RE+RN	RE+RN	Regional	Blank(s)	Blank(s)	0	None	None; diagnosed at autopsy	No radiation and/or cancer-directed surgery	Not recommended	None	Blank(s)	Blank(s)	Blank(s)	Blank(s)	Blank(s)	13	410	100	0	0	998	Blank(s)
278	73	1939	2013	Male	White	C34.1-Upper lobe, lung	8013/3: Large cell neuroendocrine carcinoma	Unknown	8.3 Carcinoma of trachea,bronchus, and lung	Unclassified	XI(f) Other and unspecified carcinomas	Left - origin of primary	Positive histology	IV	IV	Blank(s)	Blank(s)	TX	N2	M1b	TX	N2	M1	Blank(s)	Blank(s)	Blank(s)	D	D	Distant	Blank(s)	Blank(s)	0	None	None; diagnosed at autopsy	No radiation and/or cancer-directed surgery	Not recommended	None	Blank(s)	Blank(s)	Blank(s)	Blank(s)	Blank(s)	26	999	200	40	0	998	Blank(s)
279	70	1942	2013	Male	White	C34.1-Upper lobe, lung	8013/3: Large cell neuroendocrine carcinoma	Unknown	8.3 Carcinoma of trachea,bronchus, and lung	Unclassified	XI(f) Other and unspecified carcinomas	Right - origin of primary	Positive histology	IIIB	IIIB	Blank(s)	Blank(s)	T4	N2	M0	T4	N2	M0	Blank(s)	Blank(s)	Blank(s)	RE+RN	RE+RN	Regional	Blank(s)	Blank(s)	0	None	None; diagnosed at autopsy	No radiation and/or cancer-directed surgery	Not recommended	Beam radiation	Blank(s)	Blank(s)	Blank(s)	Blank(s)	Blank(s)	110	700	200	0	0	998	Blank(s)
280	59	1953	2013	Female	White	C34.1-Upper lobe, lung	8013/3: Large cell neuroendocrine carcinoma	Unknown	8.3 Carcinoma of trachea,bronchus, and lung	Unclassified	XI(f) Other and unspecified carcinomas	Right - origin of primary	Positive exfoliative cytology, no positive histology	IIIA	IIIA	Blank(s)	Blank(s)	T1a	N2	M0	T1	N2	M0	Blank(s)	Blank(s)	Blank(s)	RN	RN	Regional	Blank(s)	Blank(s)	0	None	None; diagnosed at autopsy	No radiation and/or cancer-directed surgery	Not recommended	Beam radiation	Blank(s)	Blank(s)	Blank(s)	Blank(s)	Blank(s)	48	110	200	0	0	998	Blank(s)
281	81	1931	2013	Male	White	C34.1-Upper lobe, lung	8013/3: Large cell neuroendocrine carcinoma	Poorly differentiated; Grade III	8.3 Carcinoma of trachea,bronchus, and lung	Unclassified	XI(f) Other and unspecified carcinomas	Left - origin of primary	Positive histology	IV	IV	Blank(s)	Blank(s)	T4	N0	M1b	T4	N0	M1	Blank(s)	Blank(s)	Blank(s)	D	D	Distant	Blank(s)	Blank(s)	0	None	None; diagnosed at autopsy	No radiation and/or cancer-directed surgery	Not recommended	Beam radiation	Blank(s)	Blank(s)	Blank(s)	Blank(s)	Blank(s)	55	700	0	40	0	998	Blank(s)
282	72	1941	2013	Male	Black	C34.1-Upper lobe, lung	8013/3: Large cell neuroendocrine carcinoma	Poorly differentiated; Grade III	8.3 Carcinoma of trachea,bronchus, and lung	Unclassified	XI(f) Other and unspecified carcinomas	Right - origin of primary	Positive histology	IB	IB	Blank(s)	Blank(s)	T2a	N0	M0	T2	N0	M0	Blank(s)	Blank(s)	Blank(s)	RE	RE	Regional	Blank(s)	Blank(s)	21	None	None; diagnosed at autopsy	No radiation and/or cancer-directed surgery	Surgery performed	None	Blank(s)	Blank(s)	Blank(s)	Blank(s)	Blank(s)	45	430	0	0	0	40	Blank(s)
283	72	1940	2013	Male	White	C34.1-Upper lobe, lung	8013/3: Large cell neuroendocrine carcinoma	Poorly differentiated; Grade III	8.3 Carcinoma of trachea,bronchus, and lung	Unclassified	XI(f) Other and unspecified carcinomas	Right - origin of primary	Positive histology	IB	IB	Blank(s)	Blank(s)	T2a	N0	M0	T2	N0	M0	Blank(s)	Blank(s)	Blank(s)	L	L	Localized	Blank(s)	Blank(s)	30	4 or more regional lymph nodes removed	None; diagnosed at autopsy	No radiation and/or cancer-directed surgery	Surgery performed	None	Blank(s)	Blank(s)	Blank(s)	Blank(s)	Blank(s)	43	210	0	0	0	998	Blank(s)
284	70	1943	2013	Male	White	C34.1-Upper lobe, lung	8013/3: Large cell neuroendocrine carcinoma	Poorly differentiated; Grade III	8.3 Carcinoma of trachea,bronchus, and lung	Unclassified	XI(f) Other and unspecified carcinomas	Right - origin of primary	Positive histology	IV	IV	Blank(s)	Blank(s)	T4	N3	M1b	T4	N3	M1	Blank(s)	Blank(s)	Blank(s)	D	D	Distant	Blank(s)	Blank(s)	23	Biopsy or aspiration of regional lymph node, NOS	None; diagnosed at autopsy	No radiation and/or cancer-directed surgery	Surgery performed	None	Blank(s)	Blank(s)	Blank(s)	Blank(s)	Blank(s)	41	700	600	42	40	998	Blank(s)
285	71	1941	2013	Female	White	C34.1-Upper lobe, lung	8013/3: Large cell neuroendocrine carcinoma	Unknown	8.3 Carcinoma of trachea,bronchus, and lung	Unclassified	XI(f) Other and unspecified carcinomas	Right - origin of primary	Positive histology	IIA	IIA	Blank(s)	Blank(s)	T1a	N1	M0	T1	N1	M0	Blank(s)	Blank(s)	Blank(s)	RN	RN	Regional	Blank(s)	Blank(s)	33	4 or more regional lymph nodes removed	None; diagnosed at autopsy	No radiation and/or cancer-directed surgery	Surgery performed	None	Blank(s)	Blank(s)	Blank(s)	Blank(s)	Blank(s)	20	100	100	0	0	0	Blank(s)
286	53	1959	2013	Female	White	C34.1-Upper lobe, lung	8013/3: Large cell neuroendocrine carcinoma	Poorly differentiated; Grade III	8.3 Carcinoma of trachea,bronchus, and lung	Unclassified	XI(f) Other and unspecified carcinomas	Right - origin of primary	Positive histology	IV	IV	Blank(s)	Blank(s)	T2a	N0	M1b	T2	N0	M1	Blank(s)	Blank(s)	Blank(s)	D	D	Distant	Blank(s)	Blank(s)	33	Number of regional lymph nodes removed unknown	Non-primary surgical procedure to distant site	Radiation after surgery	Surgery performed	Beam radiation	Blank(s)	Blank(s)	Blank(s)	Blank(s)	Blank(s)	34	100	0	40	0	999	Blank(s)
287	61	1952	2013	Male	White	C34.3-Lower lobe, lung	8013/3: Large cell neuroendocrine carcinoma	Undifferentiated; anaplastic; Grade IV	8.3 Carcinoma of trachea,bronchus, and lung	Unclassified	XI(f) Other and unspecified carcinomas	Left - origin of primary	Positive histology	IV	IV	Blank(s)	Blank(s)	T1b	N2	M1b	T1	N2	M1	Blank(s)	Blank(s)	Blank(s)	D	D	Distant	Blank(s)	Blank(s)	0	None	None; diagnosed at autopsy	No radiation and/or cancer-directed surgery	Not recommended	Beam radiation	Blank(s)	Blank(s)	Blank(s)	Blank(s)	Blank(s)	30	100	200	40	0	998	Blank(s)
288	54	1958	2013	Female	White	C34.9-Lung, NOS	8013/3: Large cell neuroendocrine carcinoma	Undifferentiated; anaplastic; Grade IV	8.3 Carcinoma of trachea,bronchus, and lung	Unclassified	XI(f) Other and unspecified carcinomas	Bilateral, single primary	Positive histology	IV	IV	Blank(s)	Blank(s)	TX	N2	M1b	TX	N2	M1	Blank(s)	Blank(s)	Blank(s)	D	D	Distant	Blank(s)	Blank(s)	0	None	None; diagnosed at autopsy	No radiation and/or cancer-directed surgery	Not recommended	None	Blank(s)	Blank(s)	Blank(s)	Blank(s)	Blank(s)	999	999	200	40	0	998	Blank(s)
289	65	1948	2013	Male	White	C34.1-Upper lobe, lung	8013/3: Large cell neuroendocrine carcinoma	Poorly differentiated; Grade III	8.3 Carcinoma of trachea,bronchus, and lung	Unclassified	XI(f) Other and unspecified carcinomas	Right - origin of primary	Positive histology	IA	IA	Blank(s)	Blank(s)	T1b	N0	M0	T1	N0	M0	Blank(s)	Blank(s)	Blank(s)	L	L	Localized	Blank(s)	Blank(s)	21	Biopsy or aspiration of regional lymph node, NOS	None; diagnosed at autopsy	No radiation and/or cancer-directed surgery	Surgery performed	None	Blank(s)	Blank(s)	Blank(s)	Blank(s)	Blank(s)	25	120	0	0	0	999	Blank(s)
290	81	1932	2013	Female	White	C34.3-Lower lobe, lung	8013/3: Large cell neuroendocrine carcinoma	Moderately differentiated; Grade II	8.3 Carcinoma of trachea,bronchus, and lung	Unclassified	XI(f) Other and unspecified carcinomas	Left - origin of primary	Positive histology	IIIA	IV	Blank(s)	Blank(s)	T4	N0	M0	T4	N0	M1	Blank(s)	Blank(s)	Blank(s)	D	D	Distant	Blank(s)	Blank(s)	21	1 to 3 regional lymph nodes removed	None; diagnosed at autopsy	No radiation and/or cancer-directed surgery	Surgery performed	None	Blank(s)	Blank(s)	Blank(s)	Blank(s)	Blank(s)	15	810	0	0	30	0	Blank(s)
291	63	1949	2013	Male	Black	C34.1-Upper lobe, lung	8013/3: Large cell neuroendocrine carcinoma	Unknown	8.3 Carcinoma of trachea,bronchus, and lung	Unclassified	XI(f) Other and unspecified carcinomas	Right - origin of primary	Positive histology	IB	IB	Blank(s)	Blank(s)	T2a	N0	M0	T2	N0	M0	Blank(s)	Blank(s)	Blank(s)	RE	RE	Regional	Blank(s)	Blank(s)	21	Number of regional lymph nodes removed unknown	None; diagnosed at autopsy	No radiation and/or cancer-directed surgery	Surgery performed	None	Blank(s)	Blank(s)	Blank(s)	Blank(s)	Blank(s)	12	455	0	0	0	40	Blank(s)
292	69	1943	2013	Male	White	C34.1-Upper lobe, lung	8013/3: Large cell neuroendocrine carcinoma	Unknown	8.3 Carcinoma of trachea,bronchus, and lung	Unclassified	XI(f) Other and unspecified carcinomas	Right - origin of primary	Positive histology	IV	IV	Blank(s)	Blank(s)	T2a	N2	M1b	T4	N2	M1	Blank(s)	Blank(s)	Blank(s)	D	D	Distant	Blank(s)	Blank(s)	0	None	None; diagnosed at autopsy	No radiation and/or cancer-directed surgery	Not recommended	None	Blank(s)	Blank(s)	Blank(s)	Blank(s)	Blank(s)	16	430	200	53	0	40	Blank(s)
293	62	1950	2013	Male	White	C34.1-Upper lobe, lung	8013/3: Large cell neuroendocrine carcinoma	Poorly differentiated; Grade III	8.3 Carcinoma of trachea,bronchus, and lung	Unclassified	XI(f) Other and unspecified carcinomas	Right - origin of primary	Positive histology	IA	IA	Blank(s)	Blank(s)	T1b	N0	M0	T1	N0	M0	Blank(s)	Blank(s)	Blank(s)	L	L	Localized	Blank(s)	Blank(s)	30	4 or more regional lymph nodes removed	None; diagnosed at autopsy	No radiation and/or cancer-directed surgery	Surgery performed	None	Blank(s)	Blank(s)	Blank(s)	Blank(s)	Blank(s)	25	100	0	0	0	0	Blank(s)
294	69	1943	2013	Male	White	C34.3-Lower lobe, lung	8013/3: Large cell neuroendocrine carcinoma	Unknown	8.3 Carcinoma of trachea,bronchus, and lung	Unclassified	XI(f) Other and unspecified carcinomas	Right - origin of primary	Positive histology	IIIA	IIIB	Blank(s)	Blank(s)	T3	N2	M0	T4	N2	M0	Blank(s)	Blank(s)	Blank(s)	RE+RN	RE+RN	Regional	Blank(s)	Blank(s)	0	None	None; diagnosed at autopsy	No radiation and/or cancer-directed surgery	Not recommended	Beam radiation	Blank(s)	Blank(s)	Blank(s)	Blank(s)	Blank(s)	68	460	200	0	10	998	Blank(s)
295	75	1937	2013	Female	White	C34.9-Lung, NOS	8013/3: Large cell neuroendocrine carcinoma	Poorly differentiated; Grade III	8.3 Carcinoma of trachea,bronchus, and lung	Unclassified	XI(f) Other and unspecified carcinomas	Right - origin of primary	Positive exfoliative cytology, no positive histology	IV	IV	Blank(s)	Blank(s)	T2NOS	N0	M1b	T2	N0	M1	Blank(s)	Blank(s)	Blank(s)	D	D	Distant	Blank(s)	Blank(s)	0	None	None; diagnosed at autopsy	No radiation and/or cancer-directed surgery	Not recommended	Beam radiation	Blank(s)	Blank(s)	Blank(s)	Blank(s)	Blank(s)	999	400	0	40	0	998	Blank(s)
296	60	1952	2013	Female	White	C34.1-Upper lobe, lung	8013/3: Large cell neuroendocrine carcinoma	Unknown	8.3 Carcinoma of trachea,bronchus, and lung	Unclassified	XI(f) Other and unspecified carcinomas	Right - origin of primary	Positive histology	IV	IV	Blank(s)	Blank(s)	TX	N0	M1b	TX	N0	M1	Blank(s)	Blank(s)	Blank(s)	D	D	Distant	Blank(s)	Blank(s)	0	None	Non-primary surgical procedure to distant site	Radiation after surgery	Not recommended	Beam radiation	Blank(s)	Blank(s)	Blank(s)	Blank(s)	Blank(s)	999	100	0	40	0	998	Blank(s)
297	76	1936	2013	Male	White	C34.1-Upper lobe, lung	8013/3: Large cell neuroendocrine carcinoma	Unknown	8.3 Carcinoma of trachea,bronchus, and lung	Unclassified	XI(f) Other and unspecified carcinomas	Left - origin of primary	Positive histology	IV	IV	Blank(s)	Blank(s)	T4	N2	M1b	T4	N2	M1	Blank(s)	Blank(s)	Blank(s)	D	D	Distant	Blank(s)	Blank(s)	0	None	None; diagnosed at autopsy	No radiation and/or cancer-directed surgery	Not recommended	None	Blank(s)	Blank(s)	Blank(s)	Blank(s)	Blank(s)	49	800	200	40	20	998	Blank(s)
298	71	1942	2013	Male	White	C34.3-Lower lobe, lung	8013/3: Large cell neuroendocrine carcinoma	Poorly differentiated; Grade III	8.3 Carcinoma of trachea,bronchus, and lung	Unclassified	XI(f) Other and unspecified carcinomas	Left - origin of primary	Positive histology	IA	IA	Blank(s)	Blank(s)	T1b	N0	M0	T1	N0	M0	Blank(s)	Blank(s)	Blank(s)	L	L	Localized	Blank(s)	Blank(s)	33	4 or more regional lymph nodes removed	None; diagnosed at autopsy	No radiation and/or cancer-directed surgery	Surgery performed	None	Blank(s)	Blank(s)	Blank(s)	Blank(s)	Blank(s)	30	100	0	0	0	0	Blank(s)
299	69	1944	2013	Male	White	C34.1-Upper lobe, lung	8013/3: Large cell neuroendocrine carcinoma	Poorly differentiated; Grade III	8.3 Carcinoma of trachea,bronchus, and lung	Unclassified	XI(f) Other and unspecified carcinomas	Left - origin of primary	Positive histology	IV	IV	Blank(s)	Blank(s)	T4	N0	M1b	T2	N0	M1	Blank(s)	Blank(s)	Blank(s)	D	D	Distant	Blank(s)	Blank(s)	0	None	Non-primary surgical procedure performed	Radiation after surgery	Not recommended	Beam radiation	Blank(s)	Blank(s)	Blank(s)	Blank(s)	Blank(s)	40	400	0	40	20	998	Blank(s)
300	45	1968	2013	Male	Black	C34.3-Lower lobe, lung	8013/3: Large cell neuroendocrine carcinoma	Unknown	8.3 Carcinoma of trachea,bronchus, and lung	Unclassified	XI(f) Other and unspecified carcinomas	Right - origin of primary	Positive histology	IV	IV	Blank(s)	Blank(s)	T4	N2	M1a	T4	N2	M1	Blank(s)	Blank(s)	Blank(s)	D	D	Distant	Blank(s)	Blank(s)	0	None	Non-primary surgical procedure to distant site	No radiation and/or cancer-directed surgery	Not recommended	None	Blank(s)	Blank(s)	Blank(s)	Blank(s)	Blank(s)	37	710	200	24	20	999	Blank(s)
301	57	1950	2008	Male	White	C34.3-Lower lobe, lung	8013/3: Large cell neuroendocrine carcinoma	Unknown	8.3 Carcinoma of trachea,bronchus, and lung	Unclassified	XI(f) Other and unspecified carcinomas	Right - origin of primary	Positive histology	Blank(s)	IIIB	Blank(s)	Blank(s)	Blank(s)	Blank(s)	Blank(s)	T2	N3	M0	Blank(s)	Blank(s)	Blank(s)	D	D	Distant	Blank(s)	Blank(s)	0	None	None; diagnosed at autopsy	No radiation and/or cancer-directed surgery	Recommended but not performed, unknown reason	Beam radiation	Blank(s)	Blank(s)	Blank(s)	Blank(s)	Blank(s)	42	100	600	0	988	Blank(s)	Blank(s)
302	52	1951	2003	Male	White	C34.1-Upper lobe, lung	8013/3: Large cell neuroendocrine carcinoma	Unknown	8.3 Carcinoma of trachea,bronchus, and lung	Unclassified	XI(f) Other and unspecified carcinomas	Right - origin of primary	Positive histology	Blank(s)	Blank(s)	32	32	Blank(s)	Blank(s)	Blank(s)	Blank(s)	Blank(s)	Blank(s)	T4	N0	M0	Blank(s)	Blank(s)	Regional	Regional by direct extension only	Blank(s)	21	1 to 3 regional lymph nodes removed	Non-primary surgical procedure to distant site	Radiation before and after surgery	Surgery performed	Beam radiation	Blank(s)	Blank(s)	Blank(s)	Blank(s)	Blank(s)	Blank(s)	Blank(s)	Blank(s)	Blank(s)	Blank(s)	Blank(s)	Blank(s)
303	76	1934	2010	Female	White	C34.1-Upper lobe, lung	8013/3: Large cell neuroendocrine carcinoma	Undifferentiated; anaplastic; Grade IV	8.3 Carcinoma of trachea,bronchus, and lung	Unclassified	XI(f) Other and unspecified carcinomas	Left - origin of primary	Positive histology	IIA	IIB	Blank(s)	Blank(s)	T2a	N1	M0	T2	N1	M0	Blank(s)	Blank(s)	Blank(s)	RE+RN	RE+RN	Regional	Blank(s)	Blank(s)	33	4 or more regional lymph nodes removed	None; diagnosed at autopsy	No radiation and/or cancer-directed surgery	Surgery performed	None	Blank(s)	Blank(s)	Blank(s)	Blank(s)	Blank(s)	16	420	100	0	0	40	Blank(s)
304	79	1921	2001	Female	White	C34.3-Lower lobe, lung	8013/3: Large cell neuroendocrine carcinoma	Poorly differentiated; Grade III	8.3 Carcinoma of trachea,bronchus, and lung	Unclassified	XI(f) Other and unspecified carcinomas	Left - origin of primary	Positive histology	Blank(s)	Blank(s)	31	31	Blank(s)	Blank(s)	Blank(s)	Blank(s)	Blank(s)	Blank(s)	T2	N2	M0	Blank(s)	Blank(s)	Regional	Regional lymph nodes involved only	Blank(s)	30	Blank(s)	Blank(s)	No radiation and/or cancer-directed surgery	Surgery performed	None	2	11	0	Blank(s)	Blank(s)	Blank(s)	Blank(s)	Blank(s)	Blank(s)	Blank(s)	Blank(s)	Blank(s)
305	59	1947	2006	Male	Black	C34.1-Upper lobe, lung	8013/3: Large cell neuroendocrine carcinoma	Unknown	8.3 Carcinoma of trachea,bronchus, and lung	Unclassified	XI(f) Other and unspecified carcinomas	Right - origin of primary	Positive histology	Blank(s)	IB	Blank(s)	Blank(s)	Blank(s)	Blank(s)	Blank(s)	T2	N0	M0	Blank(s)	Blank(s)	Blank(s)	L	L	Localized	Blank(s)	Blank(s)	33	4 or more regional lymph nodes removed	None; diagnosed at autopsy	No radiation and/or cancer-directed surgery	Surgery performed	None	Blank(s)	Blank(s)	Blank(s)	Blank(s)	Blank(s)	45	100	0	0	988	Blank(s)	Blank(s)
306	62	1943	2006	Female	Black	C34.1-Upper lobe, lung	8013/3: Large cell neuroendocrine carcinoma	Unknown	8.3 Carcinoma of trachea,bronchus, and lung	Unclassified	XI(f) Other and unspecified carcinomas	Left - origin of primary	Positive histology	Blank(s)	IIIA	Blank(s)	Blank(s)	Blank(s)	Blank(s)	Blank(s)	T1	N2	M0	Blank(s)	Blank(s)	Blank(s)	RN	RN	Regional	Blank(s)	Blank(s)	12	1 to 3 regional lymph nodes removed	None; diagnosed at autopsy	Radiation before and after surgery	Surgery performed	Combination of beam with implants or isotopes	Blank(s)	Blank(s)	Blank(s)	Blank(s)	Blank(s)	23	230	200	0	988	Blank(s)	Blank(s)
307	69	1943	2013	Male	White	C34.1-Upper lobe, lung	8013/3: Large cell neuroendocrine carcinoma	Poorly differentiated; Grade III	8.3 Carcinoma of trachea,bronchus, and lung	Unclassified	XI(f) Other and unspecified carcinomas	Left - origin of primary	Positive histology	IA	IA	Blank(s)	Blank(s)	T1a	N0	M0	T1	N0	M0	Blank(s)	Blank(s)	Blank(s)	L	L	Localized	Blank(s)	Blank(s)	33	4 or more regional lymph nodes removed	None; diagnosed at autopsy	No radiation and/or cancer-directed surgery	Surgery performed	None	Blank(s)	Blank(s)	Blank(s)	Blank(s)	Blank(s)	10	100	0	0	0	0	Blank(s)
308	63	1944	2007	Female	White	C34.3-Lower lobe, lung	8013/3: Large cell neuroendocrine carcinoma	Moderately differentiated; Grade II	8.3 Carcinoma of trachea,bronchus, and lung	Unclassified	XI(f) Other and unspecified carcinomas	Left - origin of primary	Positive histology	Blank(s)	IA	Blank(s)	Blank(s)	Blank(s)	Blank(s)	Blank(s)	T1	N0	M0	Blank(s)	Blank(s)	Blank(s)	L	L	Localized	Blank(s)	Blank(s)	30	1 to 3 regional lymph nodes removed	None; diagnosed at autopsy	Radiation after surgery	Surgery performed	Beam radiation	Blank(s)	Blank(s)	Blank(s)	Blank(s)	Blank(s)	21	300	0	0	988	Blank(s)	Blank(s)
309	72	1939	2012	Female	White	C34.1-Upper lobe, lung	8013/3: Large cell neuroendocrine carcinoma	Unknown	8.3 Carcinoma of trachea,bronchus, and lung	Unclassified	XI(f) Other and unspecified carcinomas	Left - origin of primary	Positive histology	IA	IA	Blank(s)	Blank(s)	T1a	N0	M0	T1	N0	M0	Blank(s)	Blank(s)	Blank(s)	L	L	Localized	Blank(s)	Blank(s)	22	None	None; diagnosed at autopsy	No radiation and/or cancer-directed surgery	Surgery performed	None	Blank(s)	Blank(s)	Blank(s)	Blank(s)	Blank(s)	15	110	0	0	0	998	Blank(s)
310	80	1926	2006	Male	White	C34.1-Upper lobe, lung	8013/3: Large cell neuroendocrine carcinoma	Unknown	8.3 Carcinoma of trachea,bronchus, and lung	Unclassified	XI(f) Other and unspecified carcinomas	Right - origin of primary	Positive histology	Blank(s)	IV	Blank(s)	Blank(s)	Blank(s)	Blank(s)	Blank(s)	TX	N0	M1	Blank(s)	Blank(s)	Blank(s)	D	D	Distant	Blank(s)	Blank(s)	0	None	None; diagnosed at autopsy	No radiation and/or cancer-directed surgery	Not recommended	None	Blank(s)	Blank(s)	Blank(s)	Blank(s)	Blank(s)	999	999	0	40	988	Blank(s)	Blank(s)
311	79	1922	2002	Male	White	C34.3-Lower lobe, lung	8013/3: Large cell neuroendocrine carcinoma	Unknown	8.3 Carcinoma of trachea,bronchus, and lung	Unclassified	XI(f) Other and unspecified carcinomas	Right - origin of primary	Positive histology	Blank(s)	Blank(s)	40	40	Blank(s)	Blank(s)	Blank(s)	Blank(s)	Blank(s)	Blank(s)	TX	N2	M1	Blank(s)	Blank(s)	Distant	Distant site(s)/node(s) involved	Blank(s)	0	Blank(s)	Blank(s)	No radiation and/or cancer-directed surgery	Recommended but not performed, unknown reason	Beam radiation	0	0	0	Blank(s)	Blank(s)	Blank(s)	Blank(s)	Blank(s)	Blank(s)	Blank(s)	Blank(s)	Blank(s)
312	64	1940	2004	Female	White	C34.9-Lung, NOS	8013/3: Large cell neuroendocrine carcinoma	Unknown	8.3 Carcinoma of trachea,bronchus, and lung	Unclassified	XI(f) Other and unspecified carcinomas	Left - origin of primary	Positive histology	Blank(s)	IIIB	Blank(s)	Blank(s)	Blank(s)	Blank(s)	Blank(s)	T4	N1	M0	Blank(s)	Blank(s)	Blank(s)	D	D	Distant	Blank(s)	Blank(s)	0	1 to 3 regional lymph nodes removed	None; diagnosed at autopsy	No radiation and/or cancer-directed surgery	Not recommended	None	Blank(s)	Blank(s)	Blank(s)	Blank(s)	Blank(s)	999	720	100	0	988	Blank(s)	Blank(s)
313	84	1925	2010	Female	White	C34.1-Upper lobe, lung	8013/3: Large cell neuroendocrine carcinoma	Unknown	8.3 Carcinoma of trachea,bronchus, and lung	Unclassified	XI(f) Other and unspecified carcinomas	Left - origin of primary	Positive histology	IV	IV	Blank(s)	Blank(s)	T2b	N2	M1b	T2	N2	M1	Blank(s)	Blank(s)	Blank(s)	D	D	Distant	Blank(s)	Blank(s)	0	None	Non-primary surgical procedure performed	No radiation and/or cancer-directed surgery	Not recommended	None	Blank(s)	Blank(s)	Blank(s)	Blank(s)	Blank(s)	53	300	200	30	0	998	Blank(s)
314	65	1941	2007	Female	White	C34.3-Lower lobe, lung	8013/3: Large cell neuroendocrine carcinoma	Poorly differentiated; Grade III	8.3 Carcinoma of trachea,bronchus, and lung	Unclassified	XI(f) Other and unspecified carcinomas	Right - origin of primary	Positive histology	Blank(s)	IIIB	Blank(s)	Blank(s)	Blank(s)	Blank(s)	Blank(s)	T4	N0	M0	Blank(s)	Blank(s)	Blank(s)	RE	RE	Regional	Blank(s)	Blank(s)	33	4 or more regional lymph nodes removed	None; diagnosed at autopsy	No radiation and/or cancer-directed surgery	Surgery performed	None	Blank(s)	Blank(s)	Blank(s)	Blank(s)	Blank(s)	65	700	0	0	988	Blank(s)	Blank(s)
315	81	1922	2003	Male	White	C34.9-Lung, NOS	8013/3: Large cell neuroendocrine carcinoma	Unknown	8.3 Carcinoma of trachea,bronchus, and lung	Unclassified	XI(f) Other and unspecified carcinomas	Right - origin of primary	Positive exfoliative cytology, no positive histology	Blank(s)	Blank(s)	32	32	Blank(s)	Blank(s)	Blank(s)	Blank(s)	Blank(s)	Blank(s)	T4	N3	M0	Blank(s)	Blank(s)	Distant	Distant site(s)/node(s) involved	Blank(s)	0	Biopsy or aspiration of regional lymph node, NOS	None; diagnosed at autopsy	Radiation after surgery	Not recommended	Beam radiation	Blank(s)	Blank(s)	Blank(s)	Blank(s)	Blank(s)	Blank(s)	Blank(s)	Blank(s)	Blank(s)	Blank(s)	Blank(s)	Blank(s)
316	68	1932	2001	Female	White	C34.3-Lower lobe, lung	8013/3: Large cell neuroendocrine carcinoma	Poorly differentiated; Grade III	8.3 Carcinoma of trachea,bronchus, and lung	Unclassified	XI(f) Other and unspecified carcinomas	Left - origin of primary	Positive histology	Blank(s)	Blank(s)	10	10	Blank(s)	Blank(s)	Blank(s)	Blank(s)	Blank(s)	Blank(s)	T1	N0	M0	Blank(s)	Blank(s)	Localized	Localized only	Blank(s)	30	Blank(s)	Blank(s)	No radiation and/or cancer-directed surgery	Surgery performed	None	4	15	0	Blank(s)	Blank(s)	Blank(s)	Blank(s)	Blank(s)	Blank(s)	Blank(s)	Blank(s)	Blank(s)
317	60	1942	2002	Male	White	C34.1-Upper lobe, lung	8013/3: Large cell neuroendocrine carcinoma	Moderately differentiated; Grade II	8.3 Carcinoma of trachea,bronchus, and lung	Unclassified	XI(f) Other and unspecified carcinomas	Left - origin of primary	Positive histology	Blank(s)	Blank(s)	10	10	Blank(s)	Blank(s)	Blank(s)	Blank(s)	Blank(s)	Blank(s)	T1	N0	M0	Blank(s)	Blank(s)	Localized	Localized only	Blank(s)	21	Blank(s)	Blank(s)	Radiation after surgery	Surgery performed	Beam radiation	4	4	0	Blank(s)	Blank(s)	Blank(s)	Blank(s)	Blank(s)	Blank(s)	Blank(s)	Blank(s)	Blank(s)
318	83	1922	2005	Male	White	C34.9-Lung, NOS	8013/3: Large cell neuroendocrine carcinoma	Unknown	8.3 Carcinoma of trachea,bronchus, and lung	Unclassified	XI(f) Other and unspecified carcinomas	Bilateral, single primary	Positive histology	Blank(s)	IV	Blank(s)	Blank(s)	Blank(s)	Blank(s)	Blank(s)	T4	N3	M1	Blank(s)	Blank(s)	Blank(s)	D	D	Distant	Blank(s)	Blank(s)	0	Biopsy or aspiration of regional lymph node, NOS	None; diagnosed at autopsy	No radiation and/or cancer-directed surgery	Not recommended	None	Blank(s)	Blank(s)	Blank(s)	Blank(s)	Blank(s)	76	650	600	23	988	Blank(s)	Blank(s)
319	75	1926	2002	Male	Black	C34.1-Upper lobe, lung	8013/3: Large cell neuroendocrine carcinoma	Undifferentiated; anaplastic; Grade IV	8.3 Carcinoma of trachea,bronchus, and lung	Unclassified	XI(f) Other and unspecified carcinomas	Left - origin of primary	Positive histology	Blank(s)	Blank(s)	32	32	Blank(s)	Blank(s)	Blank(s)	Blank(s)	Blank(s)	Blank(s)	T4	N2	M0	Blank(s)	Blank(s)	Distant	Distant site(s)/node(s) involved	Blank(s)	0	Blank(s)	Blank(s)	No radiation and/or cancer-directed surgery	Recommended but not performed, unknown reason	None	0	0	0	Blank(s)	Blank(s)	Blank(s)	Blank(s)	Blank(s)	Blank(s)	Blank(s)	Blank(s)	Blank(s)
320	58	1953	2012	Female	Black	C34.1-Upper lobe, lung	8013/3: Large cell neuroendocrine carcinoma	Poorly differentiated; Grade III	8.3 Carcinoma of trachea,bronchus, and lung	Unclassified	XI(f) Other and unspecified carcinomas	Right - origin of primary	Positive histology	IA	IA	Blank(s)	Blank(s)	T1a	N0	M0	T1	N0	M0	Blank(s)	Blank(s)	Blank(s)	L	L	Localized	Blank(s)	Blank(s)	21	None	None; diagnosed at autopsy	No radiation and/or cancer-directed surgery	Surgery performed	None	Blank(s)	Blank(s)	Blank(s)	Blank(s)	Blank(s)	10	100	0	0	0	0	Blank(s)
321	68	1940	2008	Male	White	C34.1-Upper lobe, lung	8013/3: Large cell neuroendocrine carcinoma	Poorly differentiated; Grade III	8.3 Carcinoma of trachea,bronchus, and lung	Unclassified	XI(f) Other and unspecified carcinomas	Left - origin of primary	Positive histology	Blank(s)	IB	Blank(s)	Blank(s)	Blank(s)	Blank(s)	Blank(s)	T2	N0	M0	Blank(s)	Blank(s)	Blank(s)	L	L	Localized	Blank(s)	Blank(s)	33	4 or more regional lymph nodes removed	None; diagnosed at autopsy	No radiation and/or cancer-directed surgery	Surgery performed	None	Blank(s)	Blank(s)	Blank(s)	Blank(s)	Blank(s)	35	100	0	0	988	Blank(s)	Blank(s)
322	78	1923	2002	Male	White	C34.3-Lower lobe, lung	8013/3: Large cell neuroendocrine carcinoma	Poorly differentiated; Grade III	8.3 Carcinoma of trachea,bronchus, and lung	Unclassified	XI(f) Other and unspecified carcinomas	Right - origin of primary	Positive histology	Blank(s)	Blank(s)	31	31	Blank(s)	Blank(s)	Blank(s)	Blank(s)	Blank(s)	Blank(s)	T1	N2	M0	Blank(s)	Blank(s)	Regional	Regional lymph nodes involved only	Blank(s)	21	Blank(s)	Blank(s)	Radiation after surgery	Surgery performed	Beam radiation	1	1	0	Blank(s)	Blank(s)	Blank(s)	Blank(s)	Blank(s)	Blank(s)	Blank(s)	Blank(s)	Blank(s)
323	62	1942	2005	Male	White	C34.1-Upper lobe, lung	8013/3: Large cell neuroendocrine carcinoma	Undifferentiated; anaplastic; Grade IV	8.3 Carcinoma of trachea,bronchus, and lung	Unclassified	XI(f) Other and unspecified carcinomas	Right - origin of primary	Positive histology	Blank(s)	IV	Blank(s)	Blank(s)	Blank(s)	Blank(s)	Blank(s)	T4	N2	M1	Blank(s)	Blank(s)	Blank(s)	D	D	Distant	Blank(s)	Blank(s)	0	Biopsy or aspiration of regional lymph node, NOS	None; diagnosed at autopsy	Radiation after surgery	Not recommended	Beam radiation	Blank(s)	Blank(s)	Blank(s)	Blank(s)	Blank(s)	83	750	200	40	988	Blank(s)	Blank(s)
324	58	1942	2001	Male	White	C34.1-Upper lobe, lung	8013/3: Large cell neuroendocrine carcinoma	Unknown	8.3 Carcinoma of trachea,bronchus, and lung	Unclassified	XI(f) Other and unspecified carcinomas	Left - origin of primary	Positive histology	Blank(s)	Blank(s)	32	32	Blank(s)	Blank(s)	Blank(s)	Blank(s)	Blank(s)	Blank(s)	T4	N2	M0	Blank(s)	Blank(s)	Regional	Regional by both direct extension and lymph node involvement	Blank(s)	0	Blank(s)	Blank(s)	Radiation after surgery	Surgery performed	Beam radiation	3	1	0	Blank(s)	Blank(s)	Blank(s)	Blank(s)	Blank(s)	Blank(s)	Blank(s)	Blank(s)	Blank(s)
325	74	1926	2001	Female	White	C34.1-Upper lobe, lung	8013/3: Large cell neuroendocrine carcinoma	Unknown	8.3 Carcinoma of trachea,bronchus, and lung	Unclassified	XI(f) Other and unspecified carcinomas	Left - origin of primary	Positive histology	Blank(s)	Blank(s)	31	31	Blank(s)	Blank(s)	Blank(s)	Blank(s)	Blank(s)	Blank(s)	T1	N2	M0	Blank(s)	Blank(s)	Regional	Regional lymph nodes involved only	Blank(s)	0	Blank(s)	Blank(s)	Sequence unknown, but both were given	Surgery performed	Beam radiation	3	1	0	Blank(s)	Blank(s)	Blank(s)	Blank(s)	Blank(s)	Blank(s)	Blank(s)	Blank(s)	Blank(s)
326	69	1931	2001	Female	White	C34.1-Upper lobe, lung	8013/3: Large cell neuroendocrine carcinoma	Unknown	8.3 Carcinoma of trachea,bronchus, and lung	Unclassified	XI(f) Other and unspecified carcinomas	Left - origin of primary	Positive histology	Blank(s)	Blank(s)	40	40	Blank(s)	Blank(s)	Blank(s)	Blank(s)	Blank(s)	Blank(s)	TX	N2	M1	Blank(s)	Blank(s)	Distant	Distant site(s)/node(s) involved	Blank(s)	0	Blank(s)	Blank(s)	No radiation and/or cancer-directed surgery	Recommended but not performed, unknown reason	Refused	0	0	0	Blank(s)	Blank(s)	Blank(s)	Blank(s)	Blank(s)	Blank(s)	Blank(s)	Blank(s)	Blank(s)
327	77	1923	2001	Male	White	C34.1-Upper lobe, lung	8013/3: Large cell neuroendocrine carcinoma	Unknown	8.3 Carcinoma of trachea,bronchus, and lung	Unclassified	XI(f) Other and unspecified carcinomas	Left - origin of primary	Positive histology	Blank(s)	Blank(s)	90	20	Blank(s)	Blank(s)	Blank(s)	Blank(s)	Blank(s)	Blank(s)	TXc	N1	M0	Blank(s)	Blank(s)	Regional	Regional lymph nodes involved only	Blank(s)	30	Blank(s)	Blank(s)	Radiation after surgery	Surgery performed	Beam radiation	3	97	0	Blank(s)	Blank(s)	Blank(s)	Blank(s)	Blank(s)	Blank(s)	Blank(s)	Blank(s)	Blank(s)
328	56	1944	2001	Male	White	C34.1-Upper lobe, lung	8013/3: Large cell neuroendocrine carcinoma	Unknown	8.3 Carcinoma of trachea,bronchus, and lung	Unclassified	XI(f) Other and unspecified carcinomas	Left - origin of primary	Positive histology	Blank(s)	Blank(s)	90	90	Blank(s)	Blank(s)	Blank(s)	Blank(s)	Blank(s)	Blank(s)	TX	NX	MX	Blank(s)	Blank(s)	Unknown/unstaged	Unknown/unstaged/unspecified/DCO	Blank(s)	30	Blank(s)	Blank(s)	No radiation and/or cancer-directed surgery	Surgery performed	None	1	3	0	Blank(s)	Blank(s)	Blank(s)	Blank(s)	Blank(s)	Blank(s)	Blank(s)	Blank(s)	Blank(s)
329	52	1948	2001	Female	White	C34.3-Lower lobe, lung	8013/3: Large cell neuroendocrine carcinoma	Poorly differentiated; Grade III	8.3 Carcinoma of trachea,bronchus, and lung	Unclassified	XI(f) Other and unspecified carcinomas	Left - origin of primary	Positive histology	Blank(s)	Blank(s)	10	10	Blank(s)	Blank(s)	Blank(s)	Blank(s)	Blank(s)	Blank(s)	T1	N0	M0	Blank(s)	Blank(s)	Localized	Localized only	Blank(s)	30	Blank(s)	Blank(s)	Radiation after surgery	Surgery performed	Beam radiation	4	7	0	Blank(s)	Blank(s)	Blank(s)	Blank(s)	Blank(s)	Blank(s)	Blank(s)	Blank(s)	Blank(s)
330	60	1940	2001	Female	White	C34.3-Lower lobe, lung	8013/3: Large cell neuroendocrine carcinoma	Unknown	8.3 Carcinoma of trachea,bronchus, and lung	Unclassified	XI(f) Other and unspecified carcinomas	Right - origin of primary	Positive histology	Blank(s)	Blank(s)	90	20	Blank(s)	Blank(s)	Blank(s)	Blank(s)	Blank(s)	Blank(s)	T1	NXr	M0	Blank(s)	Blank(s)	Regional	Regional lymph nodes involved only	Blank(s)	0	Blank(s)	Blank(s)	No radiation and/or cancer-directed surgery	Recommended but not performed, unknown reason	None	0	0	0	Blank(s)	Blank(s)	Blank(s)	Blank(s)	Blank(s)	Blank(s)	Blank(s)	Blank(s)	Blank(s)
331	79	1921	2001	Male	White	C34.1-Upper lobe, lung	8013/3: Large cell neuroendocrine carcinoma	Poorly differentiated; Grade III	8.3 Carcinoma of trachea,bronchus, and lung	Unclassified	XI(f) Other and unspecified carcinomas	Left - origin of primary	Positive histology	Blank(s)	Blank(s)	40	40	Blank(s)	Blank(s)	Blank(s)	Blank(s)	Blank(s)	Blank(s)	TX	N2	M1	Blank(s)	Blank(s)	Distant	Distant site(s)/node(s) involved	Blank(s)	0	Blank(s)	Blank(s)	Radiation after surgery	Surgery performed	Beam radiation	2	2	0	Blank(s)	Blank(s)	Blank(s)	Blank(s)	Blank(s)	Blank(s)	Blank(s)	Blank(s)	Blank(s)
332	74	1927	2001	Female	White	C34.1-Upper lobe, lung	8013/3: Large cell neuroendocrine carcinoma	Poorly differentiated; Grade III	8.3 Carcinoma of trachea,bronchus, and lung	Unclassified	XI(f) Other and unspecified carcinomas	Left - origin of primary	Positive histology	Blank(s)	Blank(s)	31	31	Blank(s)	Blank(s)	Blank(s)	Blank(s)	Blank(s)	Blank(s)	T2	N2	M0	Blank(s)	Blank(s)	Regional	Regional by both direct extension and lymph node involvement	Blank(s)	22	Blank(s)	Blank(s)	Radiation after surgery	Surgery performed	Beam radiation	3	5	0	Blank(s)	Blank(s)	Blank(s)	Blank(s)	Blank(s)	Blank(s)	Blank(s)	Blank(s)	Blank(s)
333	57	1945	2002	Male	Black	C34.9-Lung, NOS	8013/3: Large cell neuroendocrine carcinoma	Undifferentiated; anaplastic; Grade IV	8.3 Carcinoma of trachea,bronchus, and lung	Unclassified	XI(f) Other and unspecified carcinomas	Left - origin of primary	Positive histology	Blank(s)	Blank(s)	32	32	Blank(s)	Blank(s)	Blank(s)	Blank(s)	Blank(s)	Blank(s)	T4	N2	M0	Blank(s)	Blank(s)	Regional	Regional by both direct extension and lymph node involvement	Blank(s)	0	Blank(s)	Blank(s)	No radiation and/or cancer-directed surgery	Recommended but not performed, unknown reason	Beam radiation	0	0	0	Blank(s)	Blank(s)	Blank(s)	Blank(s)	Blank(s)	Blank(s)	Blank(s)	Blank(s)	Blank(s)
334	69	1932	2002	Female	White	C34.9-Lung, NOS	8013/3: Large cell neuroendocrine carcinoma	Unknown	8.3 Carcinoma of trachea,bronchus, and lung	Unclassified	XI(f) Other and unspecified carcinomas	Paired site, but no information concerning laterality	Positive histology	Blank(s)	Blank(s)	90	90	Blank(s)	Blank(s)	Blank(s)	Blank(s)	Blank(s)	Blank(s)	TX	N2	MX	Blank(s)	Blank(s)	Unknown/unstaged	Unknown/unstaged/unspecified/DCO	Blank(s)	0	Blank(s)	Blank(s)	Sequence unknown, but both were given	Surgery performed	Beam radiation	3	1	0	Blank(s)	Blank(s)	Blank(s)	Blank(s)	Blank(s)	Blank(s)	Blank(s)	Blank(s)	Blank(s)
335	55	1946	2002	Male	White	C34.1-Upper lobe, lung	8013/3: Large cell neuroendocrine carcinoma	Poorly differentiated; Grade III	8.3 Carcinoma of trachea,bronchus, and lung	Unclassified	XI(f) Other and unspecified carcinomas	Left - origin of primary	Positive histology	Blank(s)	Blank(s)	90	31	Blank(s)	Blank(s)	Blank(s)	Blank(s)	Blank(s)	Blank(s)	TXc	N2	M0	Blank(s)	Blank(s)	Regional	Regional lymph nodes involved only	Blank(s)	30	Blank(s)	Blank(s)	Radiation prior to surgery	Surgery performed	Beam radiation	4	5	0	Blank(s)	Blank(s)	Blank(s)	Blank(s)	Blank(s)	Blank(s)	Blank(s)	Blank(s)	Blank(s)
336	63	1939	2002	Male	White	C34.1-Upper lobe, lung	8013/3: Large cell neuroendocrine carcinoma	Poorly differentiated; Grade III	8.3 Carcinoma of trachea,bronchus, and lung	Unclassified	XI(f) Other and unspecified carcinomas	Right - origin of primary	Positive exfoliative cytology, no positive histology	Blank(s)	Blank(s)	40	40	Blank(s)	Blank(s)	Blank(s)	Blank(s)	Blank(s)	Blank(s)	TX	N2	M1	Blank(s)	Blank(s)	Distant	Distant site(s)/node(s) involved	Blank(s)	0	Blank(s)	Blank(s)	No radiation and/or cancer-directed surgery	Recommended but not performed, unknown reason	None	0	0	0	Blank(s)	Blank(s)	Blank(s)	Blank(s)	Blank(s)	Blank(s)	Blank(s)	Blank(s)	Blank(s)
337	72	1929	2001	Male	White	C34.1-Upper lobe, lung	8013/3: Large cell neuroendocrine carcinoma	Unknown	8.3 Carcinoma of trachea,bronchus, and lung	Unclassified	XI(f) Other and unspecified carcinomas	Right - origin of primary	Positive histology	Blank(s)	Blank(s)	31	31	Blank(s)	Blank(s)	Blank(s)	Blank(s)	Blank(s)	Blank(s)	T2	N2	M0	Blank(s)	Blank(s)	Regional	Regional lymph nodes involved only	Blank(s)	30	Blank(s)	Blank(s)	No radiation and/or cancer-directed surgery	Surgery performed	None	4	7	0	Blank(s)	Blank(s)	Blank(s)	Blank(s)	Blank(s)	Blank(s)	Blank(s)	Blank(s)	Blank(s)
338	73	1928	2001	Female	White	C34.1-Upper lobe, lung	8013/3: Large cell neuroendocrine carcinoma	Poorly differentiated; Grade III	8.3 Carcinoma of trachea,bronchus, and lung	Unclassified	XI(f) Other and unspecified carcinomas	Right - origin of primary	Positive histology	Blank(s)	Blank(s)	10	10	Blank(s)	Blank(s)	Blank(s)	Blank(s)	Blank(s)	Blank(s)	T1	N0	M0	Blank(s)	Blank(s)	Localized	Localized only	Blank(s)	30	Blank(s)	Blank(s)	No radiation and/or cancer-directed surgery	Surgery performed	None	4	18	0	Blank(s)	Blank(s)	Blank(s)	Blank(s)	Blank(s)	Blank(s)	Blank(s)	Blank(s)	Blank(s)
339	52	1949	2001	Female	White	C34.1-Upper lobe, lung	8013/3: Large cell neuroendocrine carcinoma	Unknown	8.3 Carcinoma of trachea,bronchus, and lung	Unclassified	XI(f) Other and unspecified carcinomas	Left - origin of primary	Positive histology	Blank(s)	Blank(s)	90	31	Blank(s)	Blank(s)	Blank(s)	Blank(s)	Blank(s)	Blank(s)	TXc	N2	M0	Blank(s)	Blank(s)	Regional	Regional lymph nodes involved only	Blank(s)	0	Blank(s)	Blank(s)	Sequence unknown, but both were given	Surgery performed	Beam radiation	3	4	0	Blank(s)	Blank(s)	Blank(s)	Blank(s)	Blank(s)	Blank(s)	Blank(s)	Blank(s)	Blank(s)
340	52	1950	2002	Male	Black	C34.3-Lower lobe, lung	8013/3: Large cell neuroendocrine carcinoma	Unknown	8.3 Carcinoma of trachea,bronchus, and lung	Unclassified	XI(f) Other and unspecified carcinomas	Left - origin of primary	Positive histology	Blank(s)	Blank(s)	32	32	Blank(s)	Blank(s)	Blank(s)	Blank(s)	Blank(s)	Blank(s)	T4	N2	M0	Blank(s)	Blank(s)	Distant	Distant site(s)/node(s) involved	Blank(s)	0	Blank(s)	Blank(s)	Radiation after surgery	Surgery performed	Beam radiation	3	2	4	Blank(s)	Blank(s)	Blank(s)	Blank(s)	Blank(s)	Blank(s)	Blank(s)	Blank(s)	Blank(s)
341	58	1943	2001	Male	White	C34.3-Lower lobe, lung	8013/3: Large cell neuroendocrine carcinoma	Poorly differentiated; Grade III	8.3 Carcinoma of trachea,bronchus, and lung	Unclassified	XI(f) Other and unspecified carcinomas	Left - origin of primary	Positive histology	Blank(s)	Blank(s)	10	10	Blank(s)	Blank(s)	Blank(s)	Blank(s)	Blank(s)	Blank(s)	T1	N0	M0	Blank(s)	Blank(s)	Localized	Localized only	Blank(s)	22	Blank(s)	Blank(s)	No radiation and/or cancer-directed surgery	Surgery performed	None	0	0	0	Blank(s)	Blank(s)	Blank(s)	Blank(s)	Blank(s)	Blank(s)	Blank(s)	Blank(s)	Blank(s)
342	79	1925	2005	Male	White	C34.1-Upper lobe, lung	8013/3: Large cell neuroendocrine carcinoma	Unknown	8.3 Carcinoma of trachea,bronchus, and lung	Unclassified	XI(f) Other and unspecified carcinomas	Left - origin of primary	Positive histology	Blank(s)	IV	Blank(s)	Blank(s)	Blank(s)	Blank(s)	Blank(s)	T2	N3	M1	Blank(s)	Blank(s)	Blank(s)	D	D	Distant	Blank(s)	Blank(s)	0	Biopsy or aspiration of regional lymph node, NOS	None; diagnosed at autopsy	Radiation after surgery	Not recommended	Beam radiation	Blank(s)	Blank(s)	Blank(s)	Blank(s)	Blank(s)	35	100	600	40	988	Blank(s)	Blank(s)
343	77	1928	2006	Male	White	C34.9-Lung, NOS	8013/3: Large cell neuroendocrine carcinoma	Unknown	8.3 Carcinoma of trachea,bronchus, and lung	Unclassified	XI(f) Other and unspecified carcinomas	Left - origin of primary	Positive histology	Blank(s)	IV	Blank(s)	Blank(s)	Blank(s)	Blank(s)	Blank(s)	TX	NX	M1	Blank(s)	Blank(s)	Blank(s)	D	D	Distant	Blank(s)	Blank(s)	0	None	Non-primary surgical procedure to distant site	No radiation and/or cancer-directed surgery	Not recommended	None	Blank(s)	Blank(s)	Blank(s)	Blank(s)	Blank(s)	999	100	999	40	988	Blank(s)	Blank(s)
344	89	1912	2001	Male	Black	C34.1-Upper lobe, lung	8013/3: Large cell neuroendocrine carcinoma	Unknown	8.3 Carcinoma of trachea,bronchus, and lung	Unclassified	XI(f) Other and unspecified carcinomas	Right - origin of primary	Unknown	Blank(s)	Blank(s)	90	90	Blank(s)	Blank(s)	Blank(s)	Blank(s)	Blank(s)	Blank(s)	TX	NX	MX	Blank(s)	Blank(s)	Unknown/unstaged	Unknown/unstaged/unspecified/DCO	Blank(s)	0	Blank(s)	Blank(s)	No radiation and/or cancer-directed surgery	Recommended but not performed, unknown reason	None	0	0	0	Blank(s)	Blank(s)	Blank(s)	Blank(s)	Blank(s)	Blank(s)	Blank(s)	Blank(s)	Blank(s)
345	71	1930	2002	Male	White	C34.1-Upper lobe, lung	8013/3: Large cell neuroendocrine carcinoma	Unknown	8.3 Carcinoma of trachea,bronchus, and lung	Unclassified	XI(f) Other and unspecified carcinomas	Left - origin of primary	Positive histology	Blank(s)	Blank(s)	90	10	Blank(s)	Blank(s)	Blank(s)	Blank(s)	Blank(s)	Blank(s)	TXc	N0	M0	Blank(s)	Blank(s)	Localized	Localized only	Blank(s)	0	Blank(s)	Blank(s)	No radiation and/or cancer-directed surgery	Not recommended, contraindicated due to other cond; autopsy only (1973-2002)	None	0	0	0	Blank(s)	Blank(s)	Blank(s)	Blank(s)	Blank(s)	Blank(s)	Blank(s)	Blank(s)	Blank(s)
346	83	1918	2002	Male	White	C34.1-Upper lobe, lung	8013/3: Large cell neuroendocrine carcinoma	Poorly differentiated; Grade III	8.3 Carcinoma of trachea,bronchus, and lung	Unclassified	XI(f) Other and unspecified carcinomas	Right - origin of primary	Positive histology	Blank(s)	Blank(s)	40	40	Blank(s)	Blank(s)	Blank(s)	Blank(s)	Blank(s)	Blank(s)	TX	N2	M1	Blank(s)	Blank(s)	Distant	Distant site(s)/node(s) involved	Blank(s)	0	Blank(s)	Blank(s)	No radiation and/or cancer-directed surgery	Recommended but not performed, unknown reason	None	0	0	0	Blank(s)	Blank(s)	Blank(s)	Blank(s)	Blank(s)	Blank(s)	Blank(s)	Blank(s)	Blank(s)
347	56	1945	2002	Male	Black	C34.9-Lung, NOS	8013/3: Large cell neuroendocrine carcinoma	Unknown	8.3 Carcinoma of trachea,bronchus, and lung	Unclassified	XI(f) Other and unspecified carcinomas	Right - origin of primary	Positive exfoliative cytology, no positive histology	Blank(s)	Blank(s)	31	31	Blank(s)	Blank(s)	Blank(s)	Blank(s)	Blank(s)	Blank(s)	T3	N2	M0	Blank(s)	Blank(s)	Regional	Regional by both direct extension and lymph node involvement	Blank(s)	0	Blank(s)	Blank(s)	Sequence unknown, but both were given	Surgery performed	Beam radiation	1	95	0	Blank(s)	Blank(s)	Blank(s)	Blank(s)	Blank(s)	Blank(s)	Blank(s)	Blank(s)	Blank(s)
348	59	1943	2002	Female	White	C34.0-Main bronchus	8013/3: Large cell neuroendocrine carcinoma	Unknown	8.3 Carcinoma of trachea,bronchus, and lung	Unclassified	XI(f) Other and unspecified carcinomas	Right - origin of primary	Positive histology	Blank(s)	Blank(s)	40	40	Blank(s)	Blank(s)	Blank(s)	Blank(s)	Blank(s)	Blank(s)	TX	N2	M1	Blank(s)	Blank(s)	Distant	Distant site(s)/node(s) involved	Blank(s)	0	Blank(s)	Blank(s)	No radiation and/or cancer-directed surgery	Surgery performed	None	0	0	6	Blank(s)	Blank(s)	Blank(s)	Blank(s)	Blank(s)	Blank(s)	Blank(s)	Blank(s)	Blank(s)
349	55	1946	2002	Female	White	C34.0-Main bronchus	8013/3: Large cell neuroendocrine carcinoma	Unknown	8.3 Carcinoma of trachea,bronchus, and lung	Unclassified	XI(f) Other and unspecified carcinomas	Right - origin of primary	Positive histology	Blank(s)	Blank(s)	32	32	Blank(s)	Blank(s)	Blank(s)	Blank(s)	Blank(s)	Blank(s)	T4	N3	M0	Blank(s)	Blank(s)	Distant	Distant site(s)/node(s) involved	Blank(s)	0	Blank(s)	Blank(s)	No radiation and/or cancer-directed surgery	Recommended but not performed, unknown reason	Beam radiation	0	0	0	Blank(s)	Blank(s)	Blank(s)	Blank(s)	Blank(s)	Blank(s)	Blank(s)	Blank(s)	Blank(s)
350	68	1934	2002	Male	White	C34.9-Lung, NOS	8013/3: Large cell neuroendocrine carcinoma	Undifferentiated; anaplastic; Grade IV	8.3 Carcinoma of trachea,bronchus, and lung	Unclassified	XI(f) Other and unspecified carcinomas	Left - origin of primary	Positive histology	Blank(s)	Blank(s)	40	40	Blank(s)	Blank(s)	Blank(s)	Blank(s)	Blank(s)	Blank(s)	TX	NX	M1	Blank(s)	Blank(s)	Distant	Distant site(s)/node(s) involved	Blank(s)	23	Blank(s)	Blank(s)	No radiation and/or cancer-directed surgery	Surgery performed	None	1	1	0	Blank(s)	Blank(s)	Blank(s)	Blank(s)	Blank(s)	Blank(s)	Blank(s)	Blank(s)	Blank(s)
351	66	1936	2002	Male	White	C34.3-Lower lobe, lung	8013/3: Large cell neuroendocrine carcinoma	Unknown	8.3 Carcinoma of trachea,bronchus, and lung	Unclassified	XI(f) Other and unspecified carcinomas	Right - origin of primary	Positive histology	Blank(s)	Blank(s)	10	10	Blank(s)	Blank(s)	Blank(s)	Blank(s)	Blank(s)	Blank(s)	T1	N0	M0	Blank(s)	Blank(s)	Localized	Localized only	Blank(s)	30	Blank(s)	Blank(s)	Radiation after surgery	Surgery performed	Beam radiation	4	20	0	Blank(s)	Blank(s)	Blank(s)	Blank(s)	Blank(s)	Blank(s)	Blank(s)	Blank(s)	Blank(s)
352	68	1933	2002	Female	White	C34.1-Upper lobe, lung	8013/3: Large cell neuroendocrine carcinoma	Poorly differentiated; Grade III	8.3 Carcinoma of trachea,bronchus, and lung	Unclassified	XI(f) Other and unspecified carcinomas	Left - origin of primary	Positive histology	Blank(s)	Blank(s)	10	10	Blank(s)	Blank(s)	Blank(s)	Blank(s)	Blank(s)	Blank(s)	T1	N0	M0	Blank(s)	Blank(s)	Localized	Localized only	Blank(s)	21	Blank(s)	Blank(s)	Radiation after surgery	Surgery performed	Beam radiation	3	2	0	Blank(s)	Blank(s)	Blank(s)	Blank(s)	Blank(s)	Blank(s)	Blank(s)	Blank(s)	Blank(s)
353	66	1935	2002	Female	White	C34.1-Upper lobe, lung	8013/3: Large cell neuroendocrine carcinoma	Unknown	8.3 Carcinoma of trachea,bronchus, and lung	Unclassified	XI(f) Other and unspecified carcinomas	Right - origin of primary	Positive histology	Blank(s)	Blank(s)	40	40	Blank(s)	Blank(s)	Blank(s)	Blank(s)	Blank(s)	Blank(s)	TX	N3	M1	Blank(s)	Blank(s)	Distant	Distant site(s)/node(s) involved	Blank(s)	0	Blank(s)	Blank(s)	Sequence unknown, but both were given	Surgery performed	Beam radiation	5	1	0	Blank(s)	Blank(s)	Blank(s)	Blank(s)	Blank(s)	Blank(s)	Blank(s)	Blank(s)	Blank(s)
354	58	1945	2003	Male	White	C34.9-Lung, NOS	8013/3: Large cell neuroendocrine carcinoma	Unknown	8.3 Carcinoma of trachea,bronchus, and lung	Unclassified	XI(f) Other and unspecified carcinomas	Right - origin of primary	Positive histology	Blank(s)	Blank(s)	40	40	Blank(s)	Blank(s)	Blank(s)	Blank(s)	Blank(s)	Blank(s)	TX	N3	M1	Blank(s)	Blank(s)	Distant	Distant site(s)/node(s) involved	Blank(s)	0	1 to 3 regional lymph nodes removed	None; diagnosed at autopsy	Radiation after surgery	Not recommended	Beam radiation	Blank(s)	Blank(s)	Blank(s)	Blank(s)	Blank(s)	Blank(s)	Blank(s)	Blank(s)	Blank(s)	Blank(s)	Blank(s)	Blank(s)
355	83	1919	2002	Male	White	C34.1-Upper lobe, lung	8013/3: Large cell neuroendocrine carcinoma	Unknown	8.3 Carcinoma of trachea,bronchus, and lung	Unclassified	XI(f) Other and unspecified carcinomas	Right - origin of primary	Positive exfoliative cytology, no positive histology	Blank(s)	Blank(s)	90	10	Blank(s)	Blank(s)	Blank(s)	Blank(s)	Blank(s)	Blank(s)	TXa	N0	M0	Blank(s)	Blank(s)	Localized	Localized only	Blank(s)	0	Blank(s)	Blank(s)	No radiation and/or cancer-directed surgery	Recommended but not performed, unknown reason	None	0	0	0	Blank(s)	Blank(s)	Blank(s)	Blank(s)	Blank(s)	Blank(s)	Blank(s)	Blank(s)	Blank(s)
356	50	1952	2002	Male	White	C34.1-Upper lobe, lung	8013/3: Large cell neuroendocrine carcinoma	Unknown	8.3 Carcinoma of trachea,bronchus, and lung	Unclassified	XI(f) Other and unspecified carcinomas	Right - origin of primary	Positive histology	Blank(s)	Blank(s)	40	40	Blank(s)	Blank(s)	Blank(s)	Blank(s)	Blank(s)	Blank(s)	TX	N0	M1	Blank(s)	Blank(s)	Distant	Distant site(s)/node(s) involved	Blank(s)	0	Blank(s)	Blank(s)	No radiation and/or cancer-directed surgery	Recommended but not performed, unknown reason	Beam radiation	0	0	0	Blank(s)	Blank(s)	Blank(s)	Blank(s)	Blank(s)	Blank(s)	Blank(s)	Blank(s)	Blank(s)
357	66	1937	2003	Female	White	C34.1-Upper lobe, lung	8013/3: Large cell neuroendocrine carcinoma	Poorly differentiated; Grade III	8.3 Carcinoma of trachea,bronchus, and lung	Unclassified	XI(f) Other and unspecified carcinomas	Left - origin of primary	Positive histology	Blank(s)	Blank(s)	10	10	Blank(s)	Blank(s)	Blank(s)	Blank(s)	Blank(s)	Blank(s)	T1	N0	M0	Blank(s)	Blank(s)	Localized	Localized only	Blank(s)	30	4 or more regional lymph nodes removed	None; diagnosed at autopsy	No radiation and/or cancer-directed surgery	Surgery performed	None	Blank(s)	Blank(s)	Blank(s)	Blank(s)	Blank(s)	Blank(s)	Blank(s)	Blank(s)	Blank(s)	Blank(s)	Blank(s)	Blank(s)
358	77	1925	2002	Female	White	C34.9-Lung, NOS	8013/3: Large cell neuroendocrine carcinoma	Unknown	8.3 Carcinoma of trachea,bronchus, and lung	Unclassified	XI(f) Other and unspecified carcinomas	Right - origin of primary	Positive histology	Blank(s)	Blank(s)	40	40	Blank(s)	Blank(s)	Blank(s)	Blank(s)	Blank(s)	Blank(s)	TX	N2	M1	Blank(s)	Blank(s)	Distant	Distant site(s)/node(s) involved	Blank(s)	0	Blank(s)	Blank(s)	No radiation and/or cancer-directed surgery	Recommended but not performed, unknown reason	Beam radiation	0	0	0	Blank(s)	Blank(s)	Blank(s)	Blank(s)	Blank(s)	Blank(s)	Blank(s)	Blank(s)	Blank(s)
359	66	1947	2013	Female	White	C34.2-Middle lobe, lung	8013/3: Large cell neuroendocrine carcinoma	Undifferentiated; anaplastic; Grade IV	8.3 Carcinoma of trachea,bronchus, and lung	Unclassified	XI(f) Other and unspecified carcinomas	Right - origin of primary	Positive histology	IIA	IIB	Blank(s)	Blank(s)	T2a	N1	M0	T2	N1	M0	Blank(s)	Blank(s)	Blank(s)	RE+RN	RE+RN	Regional	Blank(s)	Blank(s)	33	1 to 3 regional lymph nodes removed	None; diagnosed at autopsy	No radiation and/or cancer-directed surgery	Surgery performed	None	Blank(s)	Blank(s)	Blank(s)	Blank(s)	Blank(s)	30	430	100	0	0	40	Blank(s)
360	64	1946	2010	Female	Black	C34.1-Upper lobe, lung	8013/3: Large cell neuroendocrine carcinoma	Unknown	8.3 Carcinoma of trachea,bronchus, and lung	Unclassified	XI(f) Other and unspecified carcinomas	Right - origin of primary	Positive histology	IV	IV	Blank(s)	Blank(s)	TX	N1	M1b	T4	N1	M1	Blank(s)	Blank(s)	Blank(s)	D	D	Distant	Blank(s)	Blank(s)	0	Biopsy or aspiration of regional lymph node, NOS	None; diagnosed at autopsy	Radiation after surgery	Not recommended	Beam radiation	Blank(s)	Blank(s)	Blank(s)	Blank(s)	Blank(s)	5	999	500	42	0	998	Blank(s)
361	70	1932	2003	Female	White	C34.1-Upper lobe, lung	8013/3: Large cell neuroendocrine carcinoma	Poorly differentiated; Grade III	8.3 Carcinoma of trachea,bronchus, and lung	Unclassified	XI(f) Other and unspecified carcinomas	Left - origin of primary	Positive histology	Blank(s)	Blank(s)	20	20	Blank(s)	Blank(s)	Blank(s)	Blank(s)	Blank(s)	Blank(s)	T2	N1	M0	Blank(s)	Blank(s)	Regional	Regional lymph nodes involved only	Blank(s)	0	None	None; diagnosed at autopsy	No radiation and/or cancer-directed surgery	Not recommended, contraindicated due to other cond; autopsy only (1973-2002)	Recommended, unknown if administered	Blank(s)	Blank(s)	Blank(s)	Blank(s)	Blank(s)	Blank(s)	Blank(s)	Blank(s)	Blank(s)	Blank(s)	Blank(s)	Blank(s)
362	59	1943	2003	Male	White	C34.1-Upper lobe, lung	8013/3: Large cell neuroendocrine carcinoma	Unknown	8.3 Carcinoma of trachea,bronchus, and lung	Unclassified	XI(f) Other and unspecified carcinomas	Left - origin of primary	Positive histology	Blank(s)	Blank(s)	32	32	Blank(s)	Blank(s)	Blank(s)	Blank(s)	Blank(s)	Blank(s)	T4	N0	M0	Blank(s)	Blank(s)	Regional	Regional by direct extension only	Blank(s)	21	4 or more regional lymph nodes removed	None; diagnosed at autopsy	No radiation and/or cancer-directed surgery	Surgery performed	None	Blank(s)	Blank(s)	Blank(s)	Blank(s)	Blank(s)	Blank(s)	Blank(s)	Blank(s)	Blank(s)	Blank(s)	Blank(s)	Blank(s)
363	56	1947	2003	Male	White	C34.2-Middle lobe, lung	8013/3: Large cell neuroendocrine carcinoma	Poorly differentiated; Grade III	8.3 Carcinoma of trachea,bronchus, and lung	Unclassified	XI(f) Other and unspecified carcinomas	Right - origin of primary	Positive histology	Blank(s)	Blank(s)	40	40	Blank(s)	Blank(s)	Blank(s)	Blank(s)	Blank(s)	Blank(s)	TX	N2	M1	Blank(s)	Blank(s)	Distant	Distant site(s)/node(s) involved	Blank(s)	0	None	Non-primary surgical procedure to distant site	No radiation and/or cancer-directed surgery	Not recommended	None	Blank(s)	Blank(s)	Blank(s)	Blank(s)	Blank(s)	Blank(s)	Blank(s)	Blank(s)	Blank(s)	Blank(s)	Blank(s)	Blank(s)
364	41	1961	2003	Female	White	C34.2-Middle lobe, lung	8013/3: Large cell neuroendocrine carcinoma	Poorly differentiated; Grade III	8.3 Carcinoma of trachea,bronchus, and lung	Unclassified	XI(f) Other and unspecified carcinomas	Right - origin of primary	Positive histology	Blank(s)	Blank(s)	10	10	Blank(s)	Blank(s)	Blank(s)	Blank(s)	Blank(s)	Blank(s)	T1	N0	M0	Blank(s)	Blank(s)	Localized	Localized only	Blank(s)	33	4 or more regional lymph nodes removed	None; diagnosed at autopsy	No radiation and/or cancer-directed surgery	Surgery performed	None	Blank(s)	Blank(s)	Blank(s)	Blank(s)	Blank(s)	Blank(s)	Blank(s)	Blank(s)	Blank(s)	Blank(s)	Blank(s)	Blank(s)
365	71	1935	2007	Male	White	C34.3-Lower lobe, lung	8013/3: Large cell neuroendocrine carcinoma	Unknown	8.3 Carcinoma of trachea,bronchus, and lung	Unclassified	XI(f) Other and unspecified carcinomas	Left - origin of primary	Positive histology	Blank(s)	IIIB	Blank(s)	Blank(s)	Blank(s)	Blank(s)	Blank(s)	T4	N0	M0	Blank(s)	Blank(s)	Blank(s)	L	RE	Regional	Blank(s)	Blank(s)	55	4 or more regional lymph nodes removed	None; diagnosed at autopsy	No radiation and/or cancer-directed surgery	Surgery performed	None	Blank(s)	Blank(s)	Blank(s)	Blank(s)	Blank(s)	14	650	0	0	988	Blank(s)	Blank(s)
366	61	1941	2003	Male	Black	C34.1-Upper lobe, lung	8013/3: Large cell neuroendocrine carcinoma	Poorly differentiated; Grade III	8.3 Carcinoma of trachea,bronchus, and lung	Unclassified	XI(f) Other and unspecified carcinomas	Left - origin of primary	Positive histology	Blank(s)	Blank(s)	40	40	Blank(s)	Blank(s)	Blank(s)	Blank(s)	Blank(s)	Blank(s)	TX	NX	M1	Blank(s)	Blank(s)	Distant	Distant site(s)/node(s) involved	Blank(s)	0	None	None; diagnosed at autopsy	No radiation and/or cancer-directed surgery	Recommended but not performed, unknown reason	Beam radiation	Blank(s)	Blank(s)	Blank(s)	Blank(s)	Blank(s)	Blank(s)	Blank(s)	Blank(s)	Blank(s)	Blank(s)	Blank(s)	Blank(s)
367	75	1927	2003	Male	White	C34.9-Lung, NOS	8013/3: Large cell neuroendocrine carcinoma	Undifferentiated; anaplastic; Grade IV	8.3 Carcinoma of trachea,bronchus, and lung	Unclassified	XI(f) Other and unspecified carcinomas	Bilateral, single primary	Positive histology	Blank(s)	Blank(s)	40	40	Blank(s)	Blank(s)	Blank(s)	Blank(s)	Blank(s)	Blank(s)	TX	N2	M1	Blank(s)	Blank(s)	Distant	Distant site(s)/node(s) involved	Blank(s)	0	None	None; diagnosed at autopsy	No radiation and/or cancer-directed surgery	Recommended but not performed, unknown reason	Recommended, unknown if administered	Blank(s)	Blank(s)	Blank(s)	Blank(s)	Blank(s)	Blank(s)	Blank(s)	Blank(s)	Blank(s)	Blank(s)	Blank(s)	Blank(s)
368	76	1926	2002	Male	White	C34.3-Lower lobe, lung	8013/3: Large cell neuroendocrine carcinoma	Moderately differentiated; Grade II	8.3 Carcinoma of trachea,bronchus, and lung	Unclassified	XI(f) Other and unspecified carcinomas	Right - origin of primary	Positive histology	Blank(s)	Blank(s)	32	32	Blank(s)	Blank(s)	Blank(s)	Blank(s)	Blank(s)	Blank(s)	T4	N1	M0	Blank(s)	Blank(s)	Distant	Distant site(s)/node(s) involved	Blank(s)	22	Blank(s)	Blank(s)	No radiation and/or cancer-directed surgery	Surgery performed	None	2	2	6	Blank(s)	Blank(s)	Blank(s)	Blank(s)	Blank(s)	Blank(s)	Blank(s)	Blank(s)	Blank(s)
369	73	1929	2003	Male	White	C34.2-Middle lobe, lung	8013/3: Large cell neuroendocrine carcinoma	Poorly differentiated; Grade III	8.3 Carcinoma of trachea,bronchus, and lung	Unclassified	XI(f) Other and unspecified carcinomas	Right - origin of primary	Positive histology	Blank(s)	Blank(s)	31	31	Blank(s)	Blank(s)	Blank(s)	Blank(s)	Blank(s)	Blank(s)	T1	N2	M0	Blank(s)	Blank(s)	Regional	Regional lymph nodes involved only	Blank(s)	0	None	None; diagnosed at autopsy	No radiation and/or cancer-directed surgery	Recommended but not performed, unknown reason	None	Blank(s)	Blank(s)	Blank(s)	Blank(s)	Blank(s)	Blank(s)	Blank(s)	Blank(s)	Blank(s)	Blank(s)	Blank(s)	Blank(s)
370	53	1950	2003	Male	White	C34.1-Upper lobe, lung	8013/3: Large cell neuroendocrine carcinoma	Poorly differentiated; Grade III	8.3 Carcinoma of trachea,bronchus, and lung	Unclassified	XI(f) Other and unspecified carcinomas	Right - origin of primary	Positive histology	Blank(s)	Blank(s)	31	31	Blank(s)	Blank(s)	Blank(s)	Blank(s)	Blank(s)	Blank(s)	T3	N2	M0	Blank(s)	Blank(s)	Regional	Regional by both direct extension and lymph node involvement	Blank(s)	33	4 or more regional lymph nodes removed	None; diagnosed at autopsy	Radiation prior to surgery	Surgery performed	Beam radiation	Blank(s)	Blank(s)	Blank(s)	Blank(s)	Blank(s)	Blank(s)	Blank(s)	Blank(s)	Blank(s)	Blank(s)	Blank(s)	Blank(s)
371	79	1923	2003	Male	White	C34.3-Lower lobe, lung	8013/3: Large cell neuroendocrine carcinoma	Unknown	8.3 Carcinoma of trachea,bronchus, and lung	Unclassified	XI(f) Other and unspecified carcinomas	Right - origin of primary	Positive histology	Blank(s)	Blank(s)	40	40	Blank(s)	Blank(s)	Blank(s)	Blank(s)	Blank(s)	Blank(s)	TX	N0	M1	Blank(s)	Blank(s)	Distant	Distant site(s)/node(s) involved	Blank(s)	0	None	None; diagnosed at autopsy	No radiation and/or cancer-directed surgery	Recommended but not performed, unknown reason	None	Blank(s)	Blank(s)	Blank(s)	Blank(s)	Blank(s)	Blank(s)	Blank(s)	Blank(s)	Blank(s)	Blank(s)	Blank(s)	Blank(s)
372	73	1930	2003	Female	White	C34.9-Lung, NOS	8013/3: Large cell neuroendocrine carcinoma	Unknown	8.3 Carcinoma of trachea,bronchus, and lung	Unclassified	XI(f) Other and unspecified carcinomas	Bilateral, single primary	Positive histology	Blank(s)	Blank(s)	40	40	Blank(s)	Blank(s)	Blank(s)	Blank(s)	Blank(s)	Blank(s)	T4	NX	M1	Blank(s)	Blank(s)	Distant	Distant site(s)/node(s) involved	Blank(s)	0	None	Non-primary surgical procedure to distant lymph node(s)	No radiation and/or cancer-directed surgery	Recommended but not performed, unknown reason	Unknown	Blank(s)	Blank(s)	Blank(s)	Blank(s)	Blank(s)	Blank(s)	Blank(s)	Blank(s)	Blank(s)	Blank(s)	Blank(s)	Blank(s)
373	57	1945	2003	Female	White	C34.3-Lower lobe, lung	8013/3: Large cell neuroendocrine carcinoma	Unknown	8.3 Carcinoma of trachea,bronchus, and lung	Unclassified	XI(f) Other and unspecified carcinomas	Right - origin of primary	Positive histology	Blank(s)	Blank(s)	40	40	Blank(s)	Blank(s)	Blank(s)	Blank(s)	Blank(s)	Blank(s)	TX	N0	M1	Blank(s)	Blank(s)	Distant	Distant site(s)/node(s) involved	Blank(s)	0	None	None; diagnosed at autopsy	No radiation and/or cancer-directed surgery	Unknown; death certificate; or autopsy only (2003+)	None	Blank(s)	Blank(s)	Blank(s)	Blank(s)	Blank(s)	Blank(s)	Blank(s)	Blank(s)	Blank(s)	Blank(s)	Blank(s)	Blank(s)
374	59	1943	2003	Male	Black	C34.9-Lung, NOS	8013/3: Large cell neuroendocrine carcinoma	Unknown	8.3 Carcinoma of trachea,bronchus, and lung	Unclassified	XI(f) Other and unspecified carcinomas	Only one side - side unspecified	Unknown	Blank(s)	Blank(s)	40	40	Blank(s)	Blank(s)	Blank(s)	Blank(s)	Blank(s)	Blank(s)	TX	NX	M1	Blank(s)	Blank(s)	Distant	Distant site(s)/node(s) involved	Blank(s)	0	None	None; diagnosed at autopsy	No radiation and/or cancer-directed surgery	Recommended but not performed, unknown reason	Beam radiation	Blank(s)	Blank(s)	Blank(s)	Blank(s)	Blank(s)	Blank(s)	Blank(s)	Blank(s)	Blank(s)	Blank(s)	Blank(s)	Blank(s)
375	61	1942	2004	Female	Black	C34.1-Upper lobe, lung	8013/3: Large cell neuroendocrine carcinoma	Unknown	8.3 Carcinoma of trachea,bronchus, and lung	Unclassified	XI(f) Other and unspecified carcinomas	Right - origin of primary	Positive histology	Blank(s)	IV	Blank(s)	Blank(s)	Blank(s)	Blank(s)	Blank(s)	T2	N2	M1	Blank(s)	Blank(s)	Blank(s)	D	D	Distant	Blank(s)	Blank(s)	0	None	Non-primary surgical procedure to distant site	Radiation after surgery	Recommended but not performed, unknown reason	Beam radiation	Blank(s)	Blank(s)	Blank(s)	Blank(s)	Blank(s)	50	300	200	40	988	Blank(s)	Blank(s)
376	36	1967	2003	Male	Black	C34.1-Upper lobe, lung	8013/3: Large cell neuroendocrine carcinoma	Unknown	8.3 Carcinoma of trachea,bronchus, and lung	Unclassified	XI(f) Other and unspecified carcinomas	Right - origin of primary	Positive histology	Blank(s)	Blank(s)	40	40	Blank(s)	Blank(s)	Blank(s)	Blank(s)	Blank(s)	Blank(s)	TX	N1	M1	Blank(s)	Blank(s)	Distant	Distant site(s)/node(s) involved	Blank(s)	0	None	None; diagnosed at autopsy	No radiation and/or cancer-directed surgery	Recommended but not performed, unknown reason	Radiation, NOS method or source not specified	Blank(s)	Blank(s)	Blank(s)	Blank(s)	Blank(s)	Blank(s)	Blank(s)	Blank(s)	Blank(s)	Blank(s)	Blank(s)	Blank(s)
377	76	1935	2012	Male	Black	C34.1-Upper lobe, lung	8013/3: Large cell neuroendocrine carcinoma	Unknown	8.3 Carcinoma of trachea,bronchus, and lung	Unclassified	XI(f) Other and unspecified carcinomas	Right - origin of primary	Positive histology	IIA	IB	Blank(s)	Blank(s)	T2b	N0	M0	T2	N0	M0	Blank(s)	Blank(s)	Blank(s)	L	L	Localized	Blank(s)	Blank(s)	0	None	None; diagnosed at autopsy	No radiation and/or cancer-directed surgery	Not recommended	None	Blank(s)	Blank(s)	Blank(s)	Blank(s)	Blank(s)	60	100	0	0	0	998	Blank(s)
378	72	1932	2004	Female	White	C34.1-Upper lobe, lung	8013/3: Large cell neuroendocrine carcinoma	Poorly differentiated; Grade III	8.3 Carcinoma of trachea,bronchus, and lung	Unclassified	XI(f) Other and unspecified carcinomas	Left - origin of primary	Positive histology	Blank(s)	IV	Blank(s)	Blank(s)	Blank(s)	Blank(s)	Blank(s)	T2	N0	M1	Blank(s)	Blank(s)	Blank(s)	D	D	Distant	Blank(s)	Blank(s)	33	1 to 3 regional lymph nodes removed	None; diagnosed at autopsy	No radiation and/or cancer-directed surgery	Surgery performed	None	Blank(s)	Blank(s)	Blank(s)	Blank(s)	Blank(s)	20	450	0	40	988	Blank(s)	Blank(s)
379	71	1932	2004	Female	White	C34.1-Upper lobe, lung	8013/3: Large cell neuroendocrine carcinoma	Unknown	8.3 Carcinoma of trachea,bronchus, and lung	Unclassified	XI(f) Other and unspecified carcinomas	Right - origin of primary	Positive histology	Blank(s)	IIIB	Blank(s)	Blank(s)	Blank(s)	Blank(s)	Blank(s)	T4	N0	M0	Blank(s)	Blank(s)	Blank(s)	L	RE	Regional	Blank(s)	Blank(s)	33	4 or more regional lymph nodes removed	None; diagnosed at autopsy	No radiation and/or cancer-directed surgery	Surgery performed	None	Blank(s)	Blank(s)	Blank(s)	Blank(s)	Blank(s)	10	650	0	0	988	Blank(s)	Blank(s)
380	59	1945	2004	Female	White	C34.1-Upper lobe, lung	8013/3: Large cell neuroendocrine carcinoma	Poorly differentiated; Grade III	8.3 Carcinoma of trachea,bronchus, and lung	Unclassified	XI(f) Other and unspecified carcinomas	Left - origin of primary	Positive histology	Blank(s)	IB	Blank(s)	Blank(s)	Blank(s)	Blank(s)	Blank(s)	T2	N0	M0	Blank(s)	Blank(s)	Blank(s)	L	L	Localized	Blank(s)	Blank(s)	33	Number of regional lymph nodes removed unknown	None; diagnosed at autopsy	No radiation and/or cancer-directed surgery	Surgery performed	None	Blank(s)	Blank(s)	Blank(s)	Blank(s)	Blank(s)	45	200	0	0	988	Blank(s)	Blank(s)
381	67	1940	2008	Male	White	C34.3-Lower lobe, lung	8013/3: Large cell neuroendocrine carcinoma	Moderately differentiated; Grade II	8.3 Carcinoma of trachea,bronchus, and lung	Unclassified	XI(f) Other and unspecified carcinomas	Right - origin of primary	Positive histology	Blank(s)	IIB	Blank(s)	Blank(s)	Blank(s)	Blank(s)	Blank(s)	T2	N1	M0	Blank(s)	Blank(s)	Blank(s)	RN	RN	Regional	Blank(s)	Blank(s)	45	4 or more regional lymph nodes removed	None; diagnosed at autopsy	No radiation and/or cancer-directed surgery	Surgery performed	None	Blank(s)	Blank(s)	Blank(s)	Blank(s)	Blank(s)	45	100	100	0	988	Blank(s)	Blank(s)
382	83	1920	2004	Male	White	C34.9-Lung, NOS	8013/3: Large cell neuroendocrine carcinoma	Unknown	8.3 Carcinoma of trachea,bronchus, and lung	Unclassified	XI(f) Other and unspecified carcinomas	Left - origin of primary	Positive histology	Blank(s)	IV	Blank(s)	Blank(s)	Blank(s)	Blank(s)	Blank(s)	T4	N2	M1	Blank(s)	Blank(s)	Blank(s)	D	D	Distant	Blank(s)	Blank(s)	0	None	None; diagnosed at autopsy	No radiation and/or cancer-directed surgery	Not recommended	None	Blank(s)	Blank(s)	Blank(s)	Blank(s)	Blank(s)	999	760	200	40	988	Blank(s)	Blank(s)
383	62	1942	2004	Female	Black	C34.1-Upper lobe, lung	8013/3: Large cell neuroendocrine carcinoma	Unknown	8.3 Carcinoma of trachea,bronchus, and lung	Unclassified	XI(f) Other and unspecified carcinomas	Right - origin of primary	Positive histology	Blank(s)	IA	Blank(s)	Blank(s)	Blank(s)	Blank(s)	Blank(s)	T1	N0	M0	Blank(s)	Blank(s)	Blank(s)	L	L	Localized	Blank(s)	Blank(s)	33	4 or more regional lymph nodes removed	None; diagnosed at autopsy	No radiation and/or cancer-directed surgery	Surgery performed	None	Blank(s)	Blank(s)	Blank(s)	Blank(s)	Blank(s)	30	100	0	0	988	Blank(s)	Blank(s)
384	70	1933	2004	Male	White	C34.3-Lower lobe, lung	8013/3: Large cell neuroendocrine carcinoma	Undifferentiated; anaplastic; Grade IV	8.3 Carcinoma of trachea,bronchus, and lung	Unclassified	XI(f) Other and unspecified carcinomas	Left - origin of primary	Positive histology	Blank(s)	IB	Blank(s)	Blank(s)	Blank(s)	Blank(s)	Blank(s)	T2	N0	M0	Blank(s)	Blank(s)	Blank(s)	L	L	Localized	Blank(s)	Blank(s)	33	1 to 3 regional lymph nodes removed	None; diagnosed at autopsy	No radiation and/or cancer-directed surgery	Surgery performed	None	Blank(s)	Blank(s)	Blank(s)	Blank(s)	Blank(s)	45	100	0	0	988	Blank(s)	Blank(s)
385	59	1946	2005	Male	White	C34.9-Lung, NOS	8013/3: Large cell neuroendocrine carcinoma	Unknown	8.3 Carcinoma of trachea,bronchus, and lung	Unclassified	XI(f) Other and unspecified carcinomas	Left - origin of primary	Positive exfoliative cytology, no positive histology	Blank(s)	IV	Blank(s)	Blank(s)	Blank(s)	Blank(s)	Blank(s)	TX	N2	M1	Blank(s)	Blank(s)	Blank(s)	D	D	Distant	Blank(s)	Blank(s)	0	None	None; diagnosed at autopsy	No radiation and/or cancer-directed surgery	Not recommended	None	Blank(s)	Blank(s)	Blank(s)	Blank(s)	Blank(s)	999	999	200	50	988	Blank(s)	Blank(s)
386	81	1924	2005	Male	White	C34.9-Lung, NOS	8013/3: Large cell neuroendocrine carcinoma	Undifferentiated; anaplastic; Grade IV	8.3 Carcinoma of trachea,bronchus, and lung	Unclassified	XI(f) Other and unspecified carcinomas	Bilateral, single primary	Positive histology	Blank(s)	IV	Blank(s)	Blank(s)	Blank(s)	Blank(s)	Blank(s)	T3	N3	M1	Blank(s)	Blank(s)	Blank(s)	D	D	Distant	Blank(s)	Blank(s)	0	Biopsy or aspiration of regional lymph node, NOS	None; diagnosed at autopsy	No radiation and/or cancer-directed surgery	Not recommended	None	Blank(s)	Blank(s)	Blank(s)	Blank(s)	Blank(s)	999	500	600	23	988	Blank(s)	Blank(s)
387	66	1938	2005	Female	White	C34.9-Lung, NOS	8013/3: Large cell neuroendocrine carcinoma	Unknown	8.3 Carcinoma of trachea,bronchus, and lung	Unclassified	XI(f) Other and unspecified carcinomas	Left - origin of primary	Positive histology	Blank(s)	IB	Blank(s)	Blank(s)	Blank(s)	Blank(s)	Blank(s)	T2	N0	M0	Blank(s)	Blank(s)	Blank(s)	L	L	Localized	Blank(s)	Blank(s)	0	None	None; diagnosed at autopsy	No radiation and/or cancer-directed surgery	Not recommended	None	Blank(s)	Blank(s)	Blank(s)	Blank(s)	Blank(s)	40	100	0	0	988	Blank(s)	Blank(s)
388	52	1953	2005	Male	White	C34.2-Middle lobe, lung	8013/3: Large cell neuroendocrine carcinoma	Unknown	8.3 Carcinoma of trachea,bronchus, and lung	Unclassified	XI(f) Other and unspecified carcinomas	Right - origin of primary	Positive histology	Blank(s)	IV	Blank(s)	Blank(s)	Blank(s)	Blank(s)	Blank(s)	TX	N3	M1	Blank(s)	Blank(s)	Blank(s)	D	D	Distant	Blank(s)	Blank(s)	0	None	None; diagnosed at autopsy	No radiation and/or cancer-directed surgery	Not recommended	Beam radiation	Blank(s)	Blank(s)	Blank(s)	Blank(s)	Blank(s)	999	100	600	40	988	Blank(s)	Blank(s)
389	71	1934	2005	Female	White	C34.9-Lung, NOS	8013/3: Large cell neuroendocrine carcinoma	Unknown	8.3 Carcinoma of trachea,bronchus, and lung	Unclassified	XI(f) Other and unspecified carcinomas	Right - origin of primary	Positive histology	Blank(s)	IV	Blank(s)	Blank(s)	Blank(s)	Blank(s)	Blank(s)	T4	N0	M1	Blank(s)	Blank(s)	Blank(s)	D	D	Distant	Blank(s)	Blank(s)	0	None	None; diagnosed at autopsy	No radiation and/or cancer-directed surgery	Not recommended	Beam radiation	Blank(s)	Blank(s)	Blank(s)	Blank(s)	Blank(s)	999	800	0	40	988	Blank(s)	Blank(s)
390	55	1950	2005	Male	White	C34.3-Lower lobe, lung	8013/3: Large cell neuroendocrine carcinoma	Poorly differentiated; Grade III	8.3 Carcinoma of trachea,bronchus, and lung	Unclassified	XI(f) Other and unspecified carcinomas	Right - origin of primary	Positive histology	Blank(s)	IIIB	Blank(s)	Blank(s)	Blank(s)	Blank(s)	Blank(s)	T4	N2	M0	Blank(s)	Blank(s)	Blank(s)	D	D	Distant	Blank(s)	Blank(s)	30	4 or more regional lymph nodes removed	None; diagnosed at autopsy	No radiation and/or cancer-directed surgery	Surgery performed	None	Blank(s)	Blank(s)	Blank(s)	Blank(s)	Blank(s)	45	790	200	0	988	Blank(s)	Blank(s)
391	51	1954	2005	Female	White	C34.2-Middle lobe, lung	8013/3: Large cell neuroendocrine carcinoma	Unknown	8.3 Carcinoma of trachea,bronchus, and lung	Unclassified	XI(f) Other and unspecified carcinomas	Right - origin of primary	Positive histology	Blank(s)	IV	Blank(s)	Blank(s)	Blank(s)	Blank(s)	Blank(s)	T2	N2	M1	Blank(s)	Blank(s)	Blank(s)	D	D	Distant	Blank(s)	Blank(s)	0	None	None; diagnosed at autopsy	No radiation and/or cancer-directed surgery	Not recommended	None	Blank(s)	Blank(s)	Blank(s)	Blank(s)	Blank(s)	38	300	200	40	988	Blank(s)	Blank(s)
392	55	1951	2006	Male	White	C34.1-Upper lobe, lung	8013/3: Large cell neuroendocrine carcinoma	Undifferentiated; anaplastic; Grade IV	8.3 Carcinoma of trachea,bronchus, and lung	Unclassified	XI(f) Other and unspecified carcinomas	Right - origin of primary	Positive histology	Blank(s)	IIIB	Blank(s)	Blank(s)	Blank(s)	Blank(s)	Blank(s)	T4	N1	M0	Blank(s)	Blank(s)	Blank(s)	RE+RN	RE+RN	Regional	Blank(s)	Blank(s)	0	None	None; diagnosed at autopsy	No radiation and/or cancer-directed surgery	Recommended but not performed, unknown reason	Beam radiation	Blank(s)	Blank(s)	Blank(s)	Blank(s)	Blank(s)	999	700	100	0	988	Blank(s)	Blank(s)
393	55	1950	2006	Male	White	C34.9-Lung, NOS	8013/3: Large cell neuroendocrine carcinoma	Unknown	8.3 Carcinoma of trachea,bronchus, and lung	Unclassified	XI(f) Other and unspecified carcinomas	Paired site, but no information concerning laterality	Positive histology	Blank(s)	IV	Blank(s)	Blank(s)	Blank(s)	Blank(s)	Blank(s)	TX	N0	M1	Blank(s)	Blank(s)	Blank(s)	D	D	Distant	Blank(s)	Blank(s)	0	None	None; diagnosed at autopsy	No radiation and/or cancer-directed surgery	Not recommended	Beam radiation	Blank(s)	Blank(s)	Blank(s)	Blank(s)	Blank(s)	999	999	0	40	988	Blank(s)	Blank(s)
394	83	1922	2006	Female	White	C34.3-Lower lobe, lung	8013/3: Large cell neuroendocrine carcinoma	Unknown	8.3 Carcinoma of trachea,bronchus, and lung	Unclassified	XI(f) Other and unspecified carcinomas	Right - origin of primary	Positive histology	Blank(s)	IV	Blank(s)	Blank(s)	Blank(s)	Blank(s)	Blank(s)	T1	N2	M1	Blank(s)	Blank(s)	Blank(s)	D	D	Distant	Blank(s)	Blank(s)	0	None	Non-primary surgical procedure to distant lymph node(s)	No radiation and/or cancer-directed surgery	Not recommended	None	Blank(s)	Blank(s)	Blank(s)	Blank(s)	Blank(s)	15	100	200	30	988	Blank(s)	Blank(s)
395	68	1937	2006	Male	White	C34.2-Middle lobe, lung	8013/3: Large cell neuroendocrine carcinoma	Undifferentiated; anaplastic; Grade IV	8.3 Carcinoma of trachea,bronchus, and lung	Unclassified	XI(f) Other and unspecified carcinomas	Right - origin of primary	Positive histology	Blank(s)	IV	Blank(s)	Blank(s)	Blank(s)	Blank(s)	Blank(s)	T2	N2	M1	Blank(s)	Blank(s)	Blank(s)	D	D	Distant	Blank(s)	Blank(s)	0	None	None; diagnosed at autopsy	No radiation and/or cancer-directed surgery	Recommended but not performed, unknown reason	Beam radiation	Blank(s)	Blank(s)	Blank(s)	Blank(s)	Blank(s)	45	100	200	30	988	Blank(s)	Blank(s)
396	73	1932	2006	Male	White	C34.1-Upper lobe, lung	8013/3: Large cell neuroendocrine carcinoma	Unknown	8.3 Carcinoma of trachea,bronchus, and lung	Unclassified	XI(f) Other and unspecified carcinomas	Right - origin of primary	Positive histology	Blank(s)	IV	Blank(s)	Blank(s)	Blank(s)	Blank(s)	Blank(s)	T2	N1	M1	Blank(s)	Blank(s)	Blank(s)	D	D	Distant	Blank(s)	Blank(s)	0	None	None; diagnosed at autopsy	No radiation and/or cancer-directed surgery	Recommended but not performed, unknown reason	None	Blank(s)	Blank(s)	Blank(s)	Blank(s)	Blank(s)	40	230	100	40	988	Blank(s)	Blank(s)
397	69	1937	2006	Male	White	C34.9-Lung, NOS	8013/3: Large cell neuroendocrine carcinoma	Poorly differentiated; Grade III	8.3 Carcinoma of trachea,bronchus, and lung	Unclassified	XI(f) Other and unspecified carcinomas	Left - origin of primary	Positive histology	Blank(s)	IIIA	Blank(s)	Blank(s)	Blank(s)	Blank(s)	Blank(s)	T2	N2	M0	Blank(s)	Blank(s)	Blank(s)	RE+RN	RE+RN	Regional	Blank(s)	Blank(s)	0	1 to 3 regional lymph nodes removed	None; diagnosed at autopsy	Radiation after surgery	Recommended but not performed, unknown reason	Beam radiation	Blank(s)	Blank(s)	Blank(s)	Blank(s)	Blank(s)	999	400	200	0	988	Blank(s)	Blank(s)
398	84	1921	2006	Male	White	C34.1-Upper lobe, lung	8013/3: Large cell neuroendocrine carcinoma	Poorly differentiated; Grade III	8.3 Carcinoma of trachea,bronchus, and lung	Unclassified	XI(f) Other and unspecified carcinomas	Left - origin of primary	Positive histology	Blank(s)	IV	Blank(s)	Blank(s)	Blank(s)	Blank(s)	Blank(s)	T4	N0	M1	Blank(s)	Blank(s)	Blank(s)	D	D	Distant	Blank(s)	Blank(s)	0	None	None; diagnosed at autopsy	No radiation and/or cancer-directed surgery	Recommended but not performed, unknown reason	Beam radiation	Blank(s)	Blank(s)	Blank(s)	Blank(s)	Blank(s)	55	650	0	40	988	Blank(s)	Blank(s)
399	84	1921	2006	Female	White	C34.1-Upper lobe, lung	8013/3: Large cell neuroendocrine carcinoma	Unknown	8.3 Carcinoma of trachea,bronchus, and lung	Unclassified	XI(f) Other and unspecified carcinomas	Right - origin of primary	Positive histology	Blank(s)	IIIA	Blank(s)	Blank(s)	Blank(s)	Blank(s)	Blank(s)	T2	N2	M0	Blank(s)	Blank(s)	Blank(s)	RE+RN	RE+RN	Regional	Blank(s)	Blank(s)	0	None	None; diagnosed at autopsy	No radiation and/or cancer-directed surgery	Not recommended	Beam radiation	Blank(s)	Blank(s)	Blank(s)	Blank(s)	Blank(s)	52	400	200	0	988	Blank(s)	Blank(s)
400	75	1930	2006	Male	White	C34.2-Middle lobe, lung	8013/3: Large cell neuroendocrine carcinoma	Poorly differentiated; Grade III	8.3 Carcinoma of trachea,bronchus, and lung	Unclassified	XI(f) Other and unspecified carcinomas	Right - origin of primary	Positive histology	Blank(s)	IIIA	Blank(s)	Blank(s)	Blank(s)	Blank(s)	Blank(s)	T2	N2	M0	Blank(s)	Blank(s)	Blank(s)	RE+RN	RE+RN	Regional	Blank(s)	Blank(s)	33	4 or more regional lymph nodes removed	None; diagnosed at autopsy	No radiation and/or cancer-directed surgery	Surgery performed	None	Blank(s)	Blank(s)	Blank(s)	Blank(s)	Blank(s)	40	450	200	0	988	Blank(s)	Blank(s)
401	69	1940	2010	Female	White	C34.1-Upper lobe, lung	8013/3: Large cell neuroendocrine carcinoma	Undifferentiated; anaplastic; Grade IV	8.3 Carcinoma of trachea,bronchus, and lung	Unclassified	XI(f) Other and unspecified carcinomas	Left - origin of primary	Positive histology	IA	IA	Blank(s)	Blank(s)	T1b	N0	M0	T1	N0	M0	Blank(s)	Blank(s)	Blank(s)	L	L	Localized	Blank(s)	Blank(s)	21	1 to 3 regional lymph nodes removed	None; diagnosed at autopsy	No radiation and/or cancer-directed surgery	Surgery performed	None	Blank(s)	Blank(s)	Blank(s)	Blank(s)	Blank(s)	25	100	0	0	0	0	Blank(s)
402	80	1926	2006	Male	White	C34.2-Middle lobe, lung	8013/3: Large cell neuroendocrine carcinoma	Unknown	8.3 Carcinoma of trachea,bronchus, and lung	Unclassified	XI(f) Other and unspecified carcinomas	Right - origin of primary	Positive histology	Blank(s)	IIIB	Blank(s)	Blank(s)	Blank(s)	Blank(s)	Blank(s)	T4	N0	M0	Blank(s)	Blank(s)	Blank(s)	RE	RE	Regional	Blank(s)	Blank(s)	0	1 to 3 regional lymph nodes removed	None; diagnosed at autopsy	Radiation after surgery	Recommended but not performed, unknown reason	Beam radiation	Blank(s)	Blank(s)	Blank(s)	Blank(s)	Blank(s)	52	700	0	0	988	Blank(s)	Blank(s)
403	83	1922	2006	Male	White	C34.3-Lower lobe, lung	8013/3: Large cell neuroendocrine carcinoma	Unknown	8.3 Carcinoma of trachea,bronchus, and lung	Unclassified	XI(f) Other and unspecified carcinomas	Right - origin of primary	Positive histology	Blank(s)	IV	Blank(s)	Blank(s)	Blank(s)	Blank(s)	Blank(s)	T4	N2	M1	Blank(s)	Blank(s)	Blank(s)	D	D	Distant	Blank(s)	Blank(s)	23	Biopsy or aspiration of regional lymph node, NOS	None; diagnosed at autopsy	Intraoperative radiation	Surgery performed	Beam radiation	Blank(s)	Blank(s)	Blank(s)	Blank(s)	Blank(s)	30	720	200	40	988	Blank(s)	Blank(s)
404	66	1940	2006	Male	White	C34.9-Lung, NOS	8013/3: Large cell neuroendocrine carcinoma	Unknown	8.3 Carcinoma of trachea,bronchus, and lung	Unclassified	XI(f) Other and unspecified carcinomas	Paired site, but no information concerning laterality	Positive histology	Blank(s)	IV	Blank(s)	Blank(s)	Blank(s)	Blank(s)	Blank(s)	TX	NX	M1	Blank(s)	Blank(s)	Blank(s)	D	D	Distant	Blank(s)	Blank(s)	0	None	None; diagnosed at autopsy	No radiation and/or cancer-directed surgery	Not recommended	None	Blank(s)	Blank(s)	Blank(s)	Blank(s)	Blank(s)	999	999	999	40	988	Blank(s)	Blank(s)
405	44	1961	2006	Male	White	C34.9-Lung, NOS	8013/3: Large cell neuroendocrine carcinoma	Undifferentiated; anaplastic; Grade IV	8.3 Carcinoma of trachea,bronchus, and lung	Unclassified	XI(f) Other and unspecified carcinomas	Right - origin of primary	Positive histology	Blank(s)	IIIB	Blank(s)	Blank(s)	Blank(s)	Blank(s)	Blank(s)	T4	N0	M0	Blank(s)	Blank(s)	Blank(s)	D	D	Distant	Blank(s)	Blank(s)	0	None	None; diagnosed at autopsy	No radiation and/or cancer-directed surgery	Recommended but not performed, unknown reason	Beam radiation	Blank(s)	Blank(s)	Blank(s)	Blank(s)	Blank(s)	70	790	0	0	988	Blank(s)	Blank(s)
406	76	1929	2006	Male	White	C34.9-Lung, NOS	8013/3: Large cell neuroendocrine carcinoma	Unknown	8.3 Carcinoma of trachea,bronchus, and lung	Unclassified	XI(f) Other and unspecified carcinomas	Left - origin of primary	Positive histology	Blank(s)	IV	Blank(s)	Blank(s)	Blank(s)	Blank(s)	Blank(s)	T4	N2	M1	Blank(s)	Blank(s)	Blank(s)	RE+RN	D	Distant	Blank(s)	Blank(s)	0	Number of regional lymph nodes removed unknown	None; diagnosed at autopsy	Radiation after surgery	Recommended but not performed, unknown reason	Beam radiation	Blank(s)	Blank(s)	Blank(s)	Blank(s)	Blank(s)	126	700	200	35	988	Blank(s)	Blank(s)
407	79	1926	2006	Male	White	C34.1-Upper lobe, lung	8013/3: Large cell neuroendocrine carcinoma	Poorly differentiated; Grade III	8.3 Carcinoma of trachea,bronchus, and lung	Unclassified	XI(f) Other and unspecified carcinomas	Left - origin of primary	Positive histology	Blank(s)	IV	Blank(s)	Blank(s)	Blank(s)	Blank(s)	Blank(s)	T2	N0	M1	Blank(s)	Blank(s)	Blank(s)	L	D	Distant	Blank(s)	Blank(s)	0	None	None; diagnosed at autopsy	No radiation and/or cancer-directed surgery	Not recommended	Beam radiation	Blank(s)	Blank(s)	Blank(s)	Blank(s)	Blank(s)	44	100	0	35	988	Blank(s)	Blank(s)
408	84	1921	2006	Male	White	C34.9-Lung, NOS	8013/3: Large cell neuroendocrine carcinoma	Unknown	8.3 Carcinoma of trachea,bronchus, and lung	Unclassified	XI(f) Other and unspecified carcinomas	Right - origin of primary	Positive histology	Blank(s)	IV	Blank(s)	Blank(s)	Blank(s)	Blank(s)	Blank(s)	T4	N0	M1	Blank(s)	Blank(s)	Blank(s)	D	D	Distant	Blank(s)	Blank(s)	0	None	None; diagnosed at autopsy	No radiation and/or cancer-directed surgery	Not recommended	Beam radiation	Blank(s)	Blank(s)	Blank(s)	Blank(s)	Blank(s)	999	720	0	30	988	Blank(s)	Blank(s)
409	57	1949	2006	Male	Black	C34.1-Upper lobe, lung	8013/3: Large cell neuroendocrine carcinoma	Unknown	8.3 Carcinoma of trachea,bronchus, and lung	Unclassified	XI(f) Other and unspecified carcinomas	Right - origin of primary	Positive histology	Blank(s)	IV	Blank(s)	Blank(s)	Blank(s)	Blank(s)	Blank(s)	TX	N3	M1	Blank(s)	Blank(s)	Blank(s)	D	D	Distant	Blank(s)	Blank(s)	0	4 or more regional lymph nodes removed	None; diagnosed at autopsy	No radiation and/or cancer-directed surgery	Not recommended	None	Blank(s)	Blank(s)	Blank(s)	Blank(s)	Blank(s)	999	100	600	23	988	Blank(s)	Blank(s)
410	62	1945	2007	Male	White	C34.2-Middle lobe, lung	8013/3: Large cell neuroendocrine carcinoma	Undifferentiated; anaplastic; Grade IV	8.3 Carcinoma of trachea,bronchus, and lung	Unclassified	XI(f) Other and unspecified carcinomas	Right - origin of primary	Positive histology	Blank(s)	IA	Blank(s)	Blank(s)	Blank(s)	Blank(s)	Blank(s)	T1	N0	M0	Blank(s)	Blank(s)	Blank(s)	L	L	Localized	Blank(s)	Blank(s)	33	4 or more regional lymph nodes removed	None; diagnosed at autopsy	No radiation and/or cancer-directed surgery	Surgery performed	None	Blank(s)	Blank(s)	Blank(s)	Blank(s)	Blank(s)	17	100	0	0	988	Blank(s)	Blank(s)
411	53	1953	2007	Female	White	C34.1-Upper lobe, lung	8013/3: Large cell neuroendocrine carcinoma	Undifferentiated; anaplastic; Grade IV	8.3 Carcinoma of trachea,bronchus, and lung	Unclassified	XI(f) Other and unspecified carcinomas	Left - origin of primary	Positive histology	Blank(s)	IIA	Blank(s)	Blank(s)	Blank(s)	Blank(s)	Blank(s)	T1	N1	M0	Blank(s)	Blank(s)	Blank(s)	RN	RN	Regional	Blank(s)	Blank(s)	33	4 or more regional lymph nodes removed	None; diagnosed at autopsy	Radiation after surgery	Surgery performed	Beam radiation	Blank(s)	Blank(s)	Blank(s)	Blank(s)	Blank(s)	25	300	100	0	988	Blank(s)	Blank(s)
412	68	1938	2007	Female	Other (American Indian/AK Native, Asian/Pacific Islander)	C34.2-Middle lobe, lung	8013/3: Large cell neuroendocrine carcinoma	Unknown	8.3 Carcinoma of trachea,bronchus, and lung	Unclassified	XI(f) Other and unspecified carcinomas	Right - origin of primary	Positive histology	Blank(s)	IA	Blank(s)	Blank(s)	Blank(s)	Blank(s)	Blank(s)	T1	N0	M0	Blank(s)	Blank(s)	Blank(s)	L	L	Localized	Blank(s)	Blank(s)	33	4 or more regional lymph nodes removed	None; diagnosed at autopsy	Radiation after surgery	Surgery performed	Beam radiation	Blank(s)	Blank(s)	Blank(s)	Blank(s)	Blank(s)	25	100	0	0	988	Blank(s)	Blank(s)
413	77	1930	2007	Male	White	C34.1-Upper lobe, lung	8013/3: Large cell neuroendocrine carcinoma	Unknown	8.3 Carcinoma of trachea,bronchus, and lung	Unclassified	XI(f) Other and unspecified carcinomas	Left - origin of primary	Positive histology	Blank(s)	IV	Blank(s)	Blank(s)	Blank(s)	Blank(s)	Blank(s)	T2	N0	M1	Blank(s)	Blank(s)	Blank(s)	D	D	Distant	Blank(s)	Blank(s)	0	None	None; diagnosed at autopsy	No radiation and/or cancer-directed surgery	Recommended but not performed, unknown reason	Beam radiation	Blank(s)	Blank(s)	Blank(s)	Blank(s)	Blank(s)	33	100	0	40	988	Blank(s)	Blank(s)
414	54	1953	2007	Female	White	C34.1-Upper lobe, lung	8013/3: Large cell neuroendocrine carcinoma	Unknown	8.3 Carcinoma of trachea,bronchus, and lung	Unclassified	XI(f) Other and unspecified carcinomas	Left - origin of primary	Positive histology	Blank(s)	IV	Blank(s)	Blank(s)	Blank(s)	Blank(s)	Blank(s)	T4	N3	M1	Blank(s)	Blank(s)	Blank(s)	D	D	Distant	Blank(s)	Blank(s)	0	None	None; diagnosed at autopsy	No radiation and/or cancer-directed surgery	Not recommended	Beam radiation	Blank(s)	Blank(s)	Blank(s)	Blank(s)	Blank(s)	100	700	600	40	988	Blank(s)	Blank(s)
415	74	1932	2007	Male	White	C34.1-Upper lobe, lung	8013/3: Large cell neuroendocrine carcinoma	Unknown	8.3 Carcinoma of trachea,bronchus, and lung	Unclassified	XI(f) Other and unspecified carcinomas	Left - origin of primary	Positive histology	Blank(s)	UNK Stage	Blank(s)	Blank(s)	Blank(s)	Blank(s)	Blank(s)	T2	N2	MX	Blank(s)	Blank(s)	Blank(s)	RN	RN	Regional	Blank(s)	Blank(s)	0	None	None; diagnosed at autopsy	No radiation and/or cancer-directed surgery	Recommended but not performed, unknown reason	Beam radiation	Blank(s)	Blank(s)	Blank(s)	Blank(s)	Blank(s)	999	200	200	99	988	Blank(s)	Blank(s)
416	59	1948	2007	Female	White	C34.9-Lung, NOS	8013/3: Large cell neuroendocrine carcinoma	Unknown	8.3 Carcinoma of trachea,bronchus, and lung	Unclassified	XI(f) Other and unspecified carcinomas	Right - origin of primary	Positive histology	Blank(s)	IIIB	Blank(s)	Blank(s)	Blank(s)	Blank(s)	Blank(s)	T3	N3	M0	Blank(s)	Blank(s)	Blank(s)	D	D	Distant	Blank(s)	Blank(s)	0	Biopsy or aspiration of regional lymph node, NOS	None; diagnosed at autopsy	No radiation and/or cancer-directed surgery	Not recommended	None	Blank(s)	Blank(s)	Blank(s)	Blank(s)	Blank(s)	999	730	600	0	988	Blank(s)	Blank(s)
417	64	1942	2007	Female	White	C34.3-Lower lobe, lung	8013/3: Large cell neuroendocrine carcinoma	Unknown	8.3 Carcinoma of trachea,bronchus, and lung	Unclassified	XI(f) Other and unspecified carcinomas	Left - origin of primary	Positive histology	Blank(s)	IB	Blank(s)	Blank(s)	Blank(s)	Blank(s)	Blank(s)	T2	N0	M0	Blank(s)	Blank(s)	Blank(s)	RE	RE	Regional	Blank(s)	Blank(s)	22	4 or more regional lymph nodes removed	None; diagnosed at autopsy	No radiation and/or cancer-directed surgery	Surgery performed	None	Blank(s)	Blank(s)	Blank(s)	Blank(s)	Blank(s)	9	450	0	0	988	Blank(s)	Blank(s)
418	75	1933	2008	Female	White	C34.1-Upper lobe, lung	8013/3: Large cell neuroendocrine carcinoma	Unknown	8.3 Carcinoma of trachea,bronchus, and lung	Unclassified	XI(f) Other and unspecified carcinomas	Right - origin of primary	Positive histology	Blank(s)	IV	Blank(s)	Blank(s)	Blank(s)	Blank(s)	Blank(s)	TX	N2	M1	Blank(s)	Blank(s)	Blank(s)	D	D	Distant	Blank(s)	Blank(s)	0	None	None; diagnosed at autopsy	No radiation and/or cancer-directed surgery	Recommended but not performed, unknown reason	None	Blank(s)	Blank(s)	Blank(s)	Blank(s)	Blank(s)	55	999	200	40	988	Blank(s)	Blank(s)
419	47	1959	2007	Male	Other (American Indian/AK Native, Asian/Pacific Islander)	C34.1-Upper lobe, lung	8013/3: Large cell neuroendocrine carcinoma	Poorly differentiated; Grade III	8.3 Carcinoma of trachea,bronchus, and lung	Unclassified	XI(f) Other and unspecified carcinomas	Left - origin of primary	Positive histology	Blank(s)	IV	Blank(s)	Blank(s)	Blank(s)	Blank(s)	Blank(s)	T4	N3	M1	Blank(s)	Blank(s)	Blank(s)	D	D	Distant	Blank(s)	Blank(s)	0	Biopsy or aspiration of regional lymph node, NOS	None; diagnosed at autopsy	No radiation and/or cancer-directed surgery	Recommended but not performed, unknown reason	Recommended, unknown if administered	Blank(s)	Blank(s)	Blank(s)	Blank(s)	Blank(s)	29	700	600	40	988	Blank(s)	Blank(s)
420	65	1942	2008	Male	Black	C34.9-Lung, NOS	8013/3: Large cell neuroendocrine carcinoma	Moderately differentiated; Grade II	8.3 Carcinoma of trachea,bronchus, and lung	Unclassified	XI(f) Other and unspecified carcinomas	Right - origin of primary	Positive histology	Blank(s)	IIIB	Blank(s)	Blank(s)	Blank(s)	Blank(s)	Blank(s)	T4	N2	M0	Blank(s)	Blank(s)	Blank(s)	D	D	Distant	Blank(s)	Blank(s)	0	None	None; diagnosed at autopsy	No radiation and/or cancer-directed surgery	Not recommended	None	Blank(s)	Blank(s)	Blank(s)	Blank(s)	Blank(s)	999	720	200	0	988	Blank(s)	Blank(s)
421	76	1931	2008	Female	White	C34.1-Upper lobe, lung	8013/3: Large cell neuroendocrine carcinoma	Unknown	8.3 Carcinoma of trachea,bronchus, and lung	Unclassified	XI(f) Other and unspecified carcinomas	Right - origin of primary	Positive histology	Blank(s)	IIIB	Blank(s)	Blank(s)	Blank(s)	Blank(s)	Blank(s)	T4	N2	M0	Blank(s)	Blank(s)	Blank(s)	D	D	Distant	Blank(s)	Blank(s)	0	None	None; diagnosed at autopsy	No radiation and/or cancer-directed surgery	Recommended but not performed, unknown reason	Beam radiation	Blank(s)	Blank(s)	Blank(s)	Blank(s)	Blank(s)	102	720	200	0	988	Blank(s)	Blank(s)
422	65	1942	2008	Female	White	C34.1-Upper lobe, lung	8013/3: Large cell neuroendocrine carcinoma	Unknown	8.3 Carcinoma of trachea,bronchus, and lung	Unclassified	XI(f) Other and unspecified carcinomas	Right - origin of primary	Positive histology	Blank(s)	IIIA	Blank(s)	Blank(s)	Blank(s)	Blank(s)	Blank(s)	T1	N2	M0	Blank(s)	Blank(s)	Blank(s)	RN	RN	Regional	Blank(s)	Blank(s)	21	4 or more regional lymph nodes removed	None; diagnosed at autopsy	No radiation and/or cancer-directed surgery	Surgery performed	None	Blank(s)	Blank(s)	Blank(s)	Blank(s)	Blank(s)	15	100	200	0	988	Blank(s)	Blank(s)
423	85	1922	2008	Male	White	C34.2-Middle lobe, lung	8013/3: Large cell neuroendocrine carcinoma	Unknown	8.3 Carcinoma of trachea,bronchus, and lung	Unclassified	XI(f) Other and unspecified carcinomas	Right - origin of primary	Positive histology	Blank(s)	IIB	Blank(s)	Blank(s)	Blank(s)	Blank(s)	Blank(s)	T2	N1	M0	Blank(s)	Blank(s)	Blank(s)	RN	RN	Regional	Blank(s)	Blank(s)	21	1 to 3 regional lymph nodes removed	None; diagnosed at autopsy	No radiation and/or cancer-directed surgery	Surgery performed	None	Blank(s)	Blank(s)	Blank(s)	Blank(s)	Blank(s)	40	100	100	0	988	Blank(s)	Blank(s)
424	76	1932	2008	Female	Black	C34.1-Upper lobe, lung	8013/3: Large cell neuroendocrine carcinoma	Unknown	8.3 Carcinoma of trachea,bronchus, and lung	Unclassified	XI(f) Other and unspecified carcinomas	Right - origin of primary	Positive histology	Blank(s)	IV	Blank(s)	Blank(s)	Blank(s)	Blank(s)	Blank(s)	T2	N0	M1	Blank(s)	Blank(s)	Blank(s)	D	D	Distant	Blank(s)	Blank(s)	0	None	None; diagnosed at autopsy	No radiation and/or cancer-directed surgery	Not recommended	None	Blank(s)	Blank(s)	Blank(s)	Blank(s)	Blank(s)	97	100	0	40	988	Blank(s)	Blank(s)
425	48	1960	2008	Female	Black	C34.1-Upper lobe, lung	8013/3: Large cell neuroendocrine carcinoma	Unknown	8.3 Carcinoma of trachea,bronchus, and lung	Unclassified	XI(f) Other and unspecified carcinomas	Right - origin of primary	Positive histology	Blank(s)	IIB	Blank(s)	Blank(s)	Blank(s)	Blank(s)	Blank(s)	T2	N1	M0	Blank(s)	Blank(s)	Blank(s)	RN	RN	Regional	Blank(s)	Blank(s)	33	Number of regional lymph nodes removed unknown	None; diagnosed at autopsy	No radiation and/or cancer-directed surgery	Surgery performed	None	Blank(s)	Blank(s)	Blank(s)	Blank(s)	Blank(s)	35	100	100	0	988	Blank(s)	Blank(s)
426	64	1944	2009	Female	White	C34.3-Lower lobe, lung	8013/3: Large cell neuroendocrine carcinoma	Unknown	8.3 Carcinoma of trachea,bronchus, and lung	Unclassified	XI(f) Other and unspecified carcinomas	Left - origin of primary	Positive histology	Blank(s)	IIIA	Blank(s)	Blank(s)	Blank(s)	Blank(s)	Blank(s)	T1	N2	M0	Blank(s)	Blank(s)	Blank(s)	RN	RN	Regional	Blank(s)	Blank(s)	21	None	None; diagnosed at autopsy	No radiation and/or cancer-directed surgery	Surgery performed	None	Blank(s)	Blank(s)	Blank(s)	Blank(s)	Blank(s)	23	100	200	0	988	Blank(s)	Blank(s)
427	66	1942	2009	Female	White	C34.1-Upper lobe, lung	8013/3: Large cell neuroendocrine carcinoma	Undifferentiated; anaplastic; Grade IV	8.3 Carcinoma of trachea,bronchus, and lung	Unclassified	XI(f) Other and unspecified carcinomas	Left - origin of primary	Positive histology	Blank(s)	IV	Blank(s)	Blank(s)	Blank(s)	Blank(s)	Blank(s)	T1	N0	M1	Blank(s)	Blank(s)	Blank(s)	D	D	Distant	Blank(s)	Blank(s)	0	None	None; diagnosed at autopsy	No radiation and/or cancer-directed surgery	Not recommended	Beam radiation	Blank(s)	Blank(s)	Blank(s)	Blank(s)	Blank(s)	22	100	0	40	988	Blank(s)	Blank(s)
428	61	1947	2008	Male	White	C34.1-Upper lobe, lung	8013/3: Large cell neuroendocrine carcinoma	Unknown	8.3 Carcinoma of trachea,bronchus, and lung	Unclassified	XI(f) Other and unspecified carcinomas	Right - origin of primary	Positive histology	Blank(s)	IV	Blank(s)	Blank(s)	Blank(s)	Blank(s)	Blank(s)	T1	N0	M1	Blank(s)	Blank(s)	Blank(s)	D	D	Distant	Blank(s)	Blank(s)	0	None	Non-primary surgical procedure to distant site	Radiation after surgery	Not recommended	Beam radiation	Blank(s)	Blank(s)	Blank(s)	Blank(s)	Blank(s)	10	100	0	40	988	Blank(s)	Blank(s)
429	73	1935	2008	Male	Black	C34.1-Upper lobe, lung	8013/3: Large cell neuroendocrine carcinoma	Unknown	8.3 Carcinoma of trachea,bronchus, and lung	Unclassified	XI(f) Other and unspecified carcinomas	Left - origin of primary	Positive histology	Blank(s)	IB	Blank(s)	Blank(s)	Blank(s)	Blank(s)	Blank(s)	T2	N0	M0	Blank(s)	Blank(s)	Blank(s)	L	L	Localized	Blank(s)	Blank(s)	33	1 to 3 regional lymph nodes removed	None; diagnosed at autopsy	No radiation and/or cancer-directed surgery	Surgery performed	None	Blank(s)	Blank(s)	Blank(s)	Blank(s)	Blank(s)	48	100	0	0	988	Blank(s)	Blank(s)
430	60	1949	2009	Female	White	C34.9-Lung, NOS	8013/3: Large cell neuroendocrine carcinoma	Unknown	8.3 Carcinoma of trachea,bronchus, and lung	Unclassified	XI(f) Other and unspecified carcinomas	Bilateral, single primary	Positive histology	Blank(s)	IV	Blank(s)	Blank(s)	Blank(s)	Blank(s)	Blank(s)	T4	N3	M1	Blank(s)	Blank(s)	Blank(s)	D	D	Distant	Blank(s)	Blank(s)	0	None	Non-primary surgical procedure to distant lymph node(s)	Radiation after surgery	Not recommended	Beam radiation	Blank(s)	Blank(s)	Blank(s)	Blank(s)	Blank(s)	25	720	600	50	988	Blank(s)	Blank(s)
431	69	1939	2009	Male	White	C34.3-Lower lobe, lung	8013/3: Large cell neuroendocrine carcinoma	Poorly differentiated; Grade III	8.3 Carcinoma of trachea,bronchus, and lung	Unclassified	XI(f) Other and unspecified carcinomas	Left - origin of primary	Positive histology	Blank(s)	IA	Blank(s)	Blank(s)	Blank(s)	Blank(s)	Blank(s)	T1	N0	M0	Blank(s)	Blank(s)	Blank(s)	L	L	Localized	Blank(s)	Blank(s)	33	4 or more regional lymph nodes removed	None; diagnosed at autopsy	No radiation and/or cancer-directed surgery	Surgery performed	None	Blank(s)	Blank(s)	Blank(s)	Blank(s)	Blank(s)	15	100	0	0	988	Blank(s)	Blank(s)
432	67	1941	2009	Female	Black	C34.2-Middle lobe, lung	8013/3: Large cell neuroendocrine carcinoma	Unknown	8.3 Carcinoma of trachea,bronchus, and lung	Unclassified	XI(f) Other and unspecified carcinomas	Right - origin of primary	Positive histology	Blank(s)	IIB	Blank(s)	Blank(s)	Blank(s)	Blank(s)	Blank(s)	T2	N1	M0	Blank(s)	Blank(s)	Blank(s)	RE+RN	RE+RN	Regional	Blank(s)	Blank(s)	33	4 or more regional lymph nodes removed	None; diagnosed at autopsy	No radiation and/or cancer-directed surgery	Surgery performed	None	Blank(s)	Blank(s)	Blank(s)	Blank(s)	Blank(s)	34	450	100	0	988	Blank(s)	Blank(s)
433	79	1929	2009	Male	White	C34.2-Middle lobe, lung	8013/3: Large cell neuroendocrine carcinoma	Unknown	8.3 Carcinoma of trachea,bronchus, and lung	Unclassified	XI(f) Other and unspecified carcinomas	Right - origin of primary	Positive histology	Blank(s)	IV	Blank(s)	Blank(s)	Blank(s)	Blank(s)	Blank(s)	T4	N2	M1	Blank(s)	Blank(s)	Blank(s)	D	D	Distant	Blank(s)	Blank(s)	0	None	None; diagnosed at autopsy	No radiation and/or cancer-directed surgery	Recommended but not performed, unknown reason	None	Blank(s)	Blank(s)	Blank(s)	Blank(s)	Blank(s)	999	720	200	40	988	Blank(s)	Blank(s)
434	64	1944	2009	Female	White	C34.2-Middle lobe, lung	8013/3: Large cell neuroendocrine carcinoma	Moderately differentiated; Grade II	8.3 Carcinoma of trachea,bronchus, and lung	Unclassified	XI(f) Other and unspecified carcinomas	Right - origin of primary	Positive histology	Blank(s)	IA	Blank(s)	Blank(s)	Blank(s)	Blank(s)	Blank(s)	T1	N0	M0	Blank(s)	Blank(s)	Blank(s)	L	L	Localized	Blank(s)	Blank(s)	33	4 or more regional lymph nodes removed	None; diagnosed at autopsy	No radiation and/or cancer-directed surgery	Surgery performed	None	Blank(s)	Blank(s)	Blank(s)	Blank(s)	Blank(s)	10	100	0	0	0	Blank(s)	Blank(s)
435	68	1941	2010	Male	White	C34.1-Upper lobe, lung	8013/3: Large cell neuroendocrine carcinoma	Unknown	8.3 Carcinoma of trachea,bronchus, and lung	Unclassified	XI(f) Other and unspecified carcinomas	Right - origin of primary	Positive histology	IA	IA	Blank(s)	Blank(s)	T1b	N0	M0	T1	N0	M0	Blank(s)	Blank(s)	Blank(s)	L	L	Localized	Blank(s)	Blank(s)	33	4 or more regional lymph nodes removed	None; diagnosed at autopsy	No radiation and/or cancer-directed surgery	Surgery performed	None	Blank(s)	Blank(s)	Blank(s)	Blank(s)	Blank(s)	29	100	0	0	0	0	Blank(s)
436	71	1938	2009	Female	White	C34.3-Lower lobe, lung	8013/3: Large cell neuroendocrine carcinoma	Unknown	8.3 Carcinoma of trachea,bronchus, and lung	Unclassified	XI(f) Other and unspecified carcinomas	Right - origin of primary	Positive histology	Blank(s)	IA	Blank(s)	Blank(s)	Blank(s)	Blank(s)	Blank(s)	T1	N0	M0	Blank(s)	Blank(s)	Blank(s)	L	L	Localized	Blank(s)	Blank(s)	0	None	None; diagnosed at autopsy	No radiation and/or cancer-directed surgery	Not recommended	Beam radiation	Blank(s)	Blank(s)	Blank(s)	Blank(s)	Blank(s)	18	100	0	0	988	Blank(s)	Blank(s)
437	76	1936	2012	Male	White	C34.1-Upper lobe, lung	8013/3: Large cell neuroendocrine carcinoma	Undifferentiated; anaplastic; Grade IV	8.3 Carcinoma of trachea,bronchus, and lung	Unclassified	XI(f) Other and unspecified carcinomas	Left - origin of primary	Positive histology	IA	IA	Blank(s)	Blank(s)	T1a	N0	M0	T1	N0	M0	Blank(s)	Blank(s)	Blank(s)	L	L	Localized	Blank(s)	Blank(s)	33	4 or more regional lymph nodes removed	None; diagnosed at autopsy	No radiation and/or cancer-directed surgery	Surgery performed	None	Blank(s)	Blank(s)	Blank(s)	Blank(s)	Blank(s)	15	100	0	0	0	998	Blank(s)
438	80	1928	2009	Male	White	C34.3-Lower lobe, lung	8013/3: Large cell neuroendocrine carcinoma	Unknown	8.3 Carcinoma of trachea,bronchus, and lung	Unclassified	XI(f) Other and unspecified carcinomas	Right - origin of primary	Positive histology	Blank(s)	IV	Blank(s)	Blank(s)	Blank(s)	Blank(s)	Blank(s)	T4	N2	M1	Blank(s)	Blank(s)	Blank(s)	D	D	Distant	Blank(s)	Blank(s)	0	None	Non-primary surgical procedure to distant site	No radiation and/or cancer-directed surgery	Not recommended	None	Blank(s)	Blank(s)	Blank(s)	Blank(s)	Blank(s)	25	650	200	40	988	Blank(s)	Blank(s)
439	51	1957	2009	Female	White	C34.1-Upper lobe, lung	8013/3: Large cell neuroendocrine carcinoma	Unknown	8.3 Carcinoma of trachea,bronchus, and lung	Unclassified	XI(f) Other and unspecified carcinomas	Right - origin of primary	Positive histology	Blank(s)	IV	Blank(s)	Blank(s)	Blank(s)	Blank(s)	Blank(s)	T2	N3	M1	Blank(s)	Blank(s)	Blank(s)	D	D	Distant	Blank(s)	Blank(s)	0	Number of regional lymph nodes removed unknown	Non-primary surgical procedure to distant site	Radiation after surgery	Recommended but not performed, unknown reason	Beam radiation	Blank(s)	Blank(s)	Blank(s)	Blank(s)	Blank(s)	37	100	600	51	988	Blank(s)	Blank(s)
440	68	1940	2009	Female	White	C34.9-Lung, NOS	8013/3: Large cell neuroendocrine carcinoma	Unknown	8.3 Carcinoma of trachea,bronchus, and lung	Unclassified	XI(f) Other and unspecified carcinomas	Paired site, but no information concerning laterality	Positive histology	Blank(s)	IV	Blank(s)	Blank(s)	Blank(s)	Blank(s)	Blank(s)	TX	N0	M1	Blank(s)	Blank(s)	Blank(s)	D	D	Distant	Blank(s)	Blank(s)	0	None	Non-primary surgical procedure to distant site	Radiation after surgery	Recommended but not performed, unknown reason	Beam radiation	Blank(s)	Blank(s)	Blank(s)	Blank(s)	Blank(s)	999	999	0	40	988	Blank(s)	Blank(s)
441	49	1960	2009	Male	White	C34.0-Main bronchus	8013/3: Large cell neuroendocrine carcinoma	Unknown	8.3 Carcinoma of trachea,bronchus, and lung	Unclassified	XI(f) Other and unspecified carcinomas	Left - origin of primary	Positive histology	Blank(s)	IV	Blank(s)	Blank(s)	Blank(s)	Blank(s)	Blank(s)	T4	N2	M1	Blank(s)	Blank(s)	Blank(s)	D	D	Distant	Blank(s)	Blank(s)	0	None	None; diagnosed at autopsy	No radiation and/or cancer-directed surgery	Not recommended	Beam radiation	Blank(s)	Blank(s)	Blank(s)	Blank(s)	Blank(s)	63	700	200	50	988	Blank(s)	Blank(s)
442	65	1943	2009	Male	White	C34.1-Upper lobe, lung	8013/3: Large cell neuroendocrine carcinoma	Poorly differentiated; Grade III	8.3 Carcinoma of trachea,bronchus, and lung	Unclassified	XI(f) Other and unspecified carcinomas	Left - origin of primary	Positive histology	Blank(s)	IIIA	Blank(s)	Blank(s)	Blank(s)	Blank(s)	Blank(s)	T1	N2	M0	Blank(s)	Blank(s)	Blank(s)	RN	RN	Regional	Blank(s)	Blank(s)	0	None	None; diagnosed at autopsy	No radiation and/or cancer-directed surgery	Not recommended	Beam radiation	Blank(s)	Blank(s)	Blank(s)	Blank(s)	Blank(s)	16	100	200	0	988	Blank(s)	Blank(s)
443	84	1924	2009	Male	White	C34.1-Upper lobe, lung	8013/3: Large cell neuroendocrine carcinoma	Unknown	8.3 Carcinoma of trachea,bronchus, and lung	Unclassified	XI(f) Other and unspecified carcinomas	Left - origin of primary	Positive histology	Blank(s)	IV	Blank(s)	Blank(s)	Blank(s)	Blank(s)	Blank(s)	T4	N2	M1	Blank(s)	Blank(s)	Blank(s)	D	D	Distant	Blank(s)	Blank(s)	0	None	None; diagnosed at autopsy	No radiation and/or cancer-directed surgery	Not recommended	None	Blank(s)	Blank(s)	Blank(s)	Blank(s)	Blank(s)	38	650	200	40	988	Blank(s)	Blank(s)
444	68	1941	2010	Male	White	C34.3-Lower lobe, lung	8013/3: Large cell neuroendocrine carcinoma	Poorly differentiated; Grade III	8.3 Carcinoma of trachea,bronchus, and lung	Unclassified	XI(f) Other and unspecified carcinomas	Right - origin of primary	Positive histology	IV	IV	Blank(s)	Blank(s)	T1a	N0	M1b	T1	N0	M1	Blank(s)	Blank(s)	Blank(s)	D	D	Distant	Blank(s)	Blank(s)	0	None	None; diagnosed at autopsy	No radiation and/or cancer-directed surgery	Recommended but not performed, unknown reason	None	Blank(s)	Blank(s)	Blank(s)	Blank(s)	Blank(s)	18	300	0	40	0	0	Blank(s)
445	69	1938	2008	Male	White	C34.3-Lower lobe, lung	8013/3: Large cell neuroendocrine carcinoma	Unknown	8.3 Carcinoma of trachea,bronchus, and lung	Unclassified	XI(f) Other and unspecified carcinomas	Right - origin of primary	Positive histology	Blank(s)	IV	Blank(s)	Blank(s)	Blank(s)	Blank(s)	Blank(s)	T4	N2	M1	Blank(s)	Blank(s)	Blank(s)	D	D	Distant	Blank(s)	Blank(s)	0	None	None; diagnosed at autopsy	No radiation and/or cancer-directed surgery	Not recommended	Beam radiation	Blank(s)	Blank(s)	Blank(s)	Blank(s)	Blank(s)	80	700	200	51	0	Blank(s)	Blank(s)
446	59	1951	2010	Female	Black	C34.1-Upper lobe, lung	8013/3: Large cell neuroendocrine carcinoma	Undifferentiated; anaplastic; Grade IV	8.3 Carcinoma of trachea,bronchus, and lung	Unclassified	XI(f) Other and unspecified carcinomas	Left - origin of primary	Positive histology	IA	IA	Blank(s)	Blank(s)	T1b	N0	M0	T1	N0	M0	Blank(s)	Blank(s)	Blank(s)	L	L	Localized	Blank(s)	Blank(s)	22	4 or more regional lymph nodes removed	None; diagnosed at autopsy	No radiation and/or cancer-directed surgery	Surgery performed	Recommended, unknown if administered	Blank(s)	Blank(s)	Blank(s)	Blank(s)	Blank(s)	30	100	0	0	0	0	Blank(s)
447	72	1937	2010	Male	White	C34.1-Upper lobe, lung	8013/3: Large cell neuroendocrine carcinoma	Unknown	8.3 Carcinoma of trachea,bronchus, and lung	Unclassified	XI(f) Other and unspecified carcinomas	Right - origin of primary	Positive histology	IV	IV	Blank(s)	Blank(s)	T4	N2	M1a	T2	N2	M1	Blank(s)	Blank(s)	Blank(s)	D	D	Distant	Blank(s)	Blank(s)	21	Biopsy or aspiration of regional lymph node, NOS	None; diagnosed at autopsy	Radiation after surgery	Surgery performed	Beam radiation	Blank(s)	Blank(s)	Blank(s)	Blank(s)	Blank(s)	20	430	200	23	20	0	Blank(s)
448	77	1932	2010	Male	White	C34.9-Lung, NOS	8013/3: Large cell neuroendocrine carcinoma	Unknown	8.3 Carcinoma of trachea,bronchus, and lung	Unclassified	XI(f) Other and unspecified carcinomas	Paired site, but no information concerning laterality	Positive histology	IV	IV	Blank(s)	Blank(s)	T3	N0	M1b	T4	N0	M1	Blank(s)	Blank(s)	Blank(s)	D	D	Distant	Blank(s)	Blank(s)	0	None	None; diagnosed at autopsy	No radiation and/or cancer-directed surgery	Recommended but not performed, unknown reason	None	Blank(s)	Blank(s)	Blank(s)	Blank(s)	Blank(s)	999	999	0	40	40	0	Blank(s)
449	56	1954	2011	Male	White	C34.1-Upper lobe, lung	8013/3: Large cell neuroendocrine carcinoma	Unknown	8.3 Carcinoma of trachea,bronchus, and lung	Unclassified	XI(f) Other and unspecified carcinomas	Left - origin of primary	Positive histology	IB	IB	Blank(s)	Blank(s)	T2a	N0	M0	T2	N0	M0	Blank(s)	Blank(s)	Blank(s)	RE	RE	Regional	Blank(s)	Blank(s)	21	1 to 3 regional lymph nodes removed	None; diagnosed at autopsy	No radiation and/or cancer-directed surgery	Surgery performed	None	Blank(s)	Blank(s)	Blank(s)	Blank(s)	Blank(s)	22	430	0	0	0	10	Blank(s)
450	74	1934	2009	Female	White	C34.3-Lower lobe, lung	8013/3: Large cell neuroendocrine carcinoma	Unknown	8.3 Carcinoma of trachea,bronchus, and lung	Unclassified	XI(f) Other and unspecified carcinomas	Left - origin of primary	Positive histology	Blank(s)	IIIA	Blank(s)	Blank(s)	Blank(s)	Blank(s)	Blank(s)	T1	N2	M0	Blank(s)	Blank(s)	Blank(s)	RN	RN	Regional	Blank(s)	Blank(s)	33	1 to 3 regional lymph nodes removed	None; diagnosed at autopsy	No radiation and/or cancer-directed surgery	Surgery performed	None	Blank(s)	Blank(s)	Blank(s)	Blank(s)	Blank(s)	25	100	200	0	0	Blank(s)	Blank(s)
451	42	1967	2010	Male	Black	C34.9-Lung, NOS	8013/3: Large cell neuroendocrine carcinoma	Unknown	8.3 Carcinoma of trachea,bronchus, and lung	Unclassified	XI(f) Other and unspecified carcinomas	Bilateral, single primary	Positive histology	IV	IV	Blank(s)	Blank(s)	T3	N3	M1b	T4	N3	M1	Blank(s)	Blank(s)	Blank(s)	D	D	Distant	Blank(s)	Blank(s)	0	Biopsy or aspiration of regional lymph node, NOS	None; diagnosed at autopsy	Radiation after surgery	Not recommended	Beam radiation	Blank(s)	Blank(s)	Blank(s)	Blank(s)	Blank(s)	999	999	600	42	40	998	Blank(s)
452	53	1956	2009	Female	Black	C34.1-Upper lobe, lung	8013/3: Large cell neuroendocrine carcinoma	Poorly differentiated; Grade III	8.3 Carcinoma of trachea,bronchus, and lung	Unclassified	XI(f) Other and unspecified carcinomas	Right - origin of primary	Positive histology	Blank(s)	IB	Blank(s)	Blank(s)	Blank(s)	Blank(s)	Blank(s)	T2	N0	M0	Blank(s)	Blank(s)	Blank(s)	L	L	Localized	Blank(s)	Blank(s)	33	4 or more regional lymph nodes removed	None; diagnosed at autopsy	No radiation and/or cancer-directed surgery	Surgery performed	None	Blank(s)	Blank(s)	Blank(s)	Blank(s)	Blank(s)	53	100	0	0	0	Blank(s)	Blank(s)
453	69	1940	2010	Female	White	C34.1-Upper lobe, lung	8013/3: Large cell neuroendocrine carcinoma	Unknown	8.3 Carcinoma of trachea,bronchus, and lung	Unclassified	XI(f) Other and unspecified carcinomas	Right - origin of primary	Positive histology	IIIB	IIIB	Blank(s)	Blank(s)	T3	N3	M0	T2	N3	M0	Blank(s)	Blank(s)	Blank(s)	D	D	Distant	Blank(s)	Blank(s)	0	Biopsy or aspiration of regional lymph node, NOS	None; diagnosed at autopsy	Radiation after surgery	Recommended but not performed, unknown reason	Beam radiation	Blank(s)	Blank(s)	Blank(s)	Blank(s)	Blank(s)	86	100	600	0	0	998	Blank(s)
454	73	1937	2010	Female	White	C34.3-Lower lobe, lung	8013/3: Large cell neuroendocrine carcinoma	Poorly differentiated; Grade III	8.3 Carcinoma of trachea,bronchus, and lung	Unclassified	XI(f) Other and unspecified carcinomas	Left - origin of primary	Positive histology	IV	IV	Blank(s)	Blank(s)	T4	N2	M1b	T4	N2	M1	Blank(s)	Blank(s)	Blank(s)	D	D	Distant	Blank(s)	Blank(s)	0	Biopsy or aspiration of regional lymph node, NOS	Non-primary surgical procedure to distant site	Radiation after surgery	Not recommended	Beam radiation	Blank(s)	Blank(s)	Blank(s)	Blank(s)	Blank(s)	10	700	200	52	20	998	Blank(s)
455	71	1938	2010	Female	Black	C34.3-Lower lobe, lung	8013/3: Large cell neuroendocrine carcinoma	Unknown	8.3 Carcinoma of trachea,bronchus, and lung	Unclassified	XI(f) Other and unspecified carcinomas	Left - origin of primary	Positive histology	IV	IV	Blank(s)	Blank(s)	T1b	N2	M1b	T1	N2	M1	Blank(s)	Blank(s)	Blank(s)	D	D	Distant	Blank(s)	Blank(s)	0	None	None; diagnosed at autopsy	No radiation and/or cancer-directed surgery	Recommended but not performed, unknown reason	Beam radiation	Blank(s)	Blank(s)	Blank(s)	Blank(s)	Blank(s)	28	100	200	40	0	998	Blank(s)
456	54	1956	2010	Female	White	C34.3-Lower lobe, lung	8013/3: Large cell neuroendocrine carcinoma	Unknown	8.3 Carcinoma of trachea,bronchus, and lung	Unclassified	XI(f) Other and unspecified carcinomas	Left - origin of primary	Positive histology	IIIA	IIIA	Blank(s)	Blank(s)	T1b	N2	M0	T1	N2	M0	Blank(s)	Blank(s)	Blank(s)	RN	RN	Regional	Blank(s)	Blank(s)	0	1 to 3 regional lymph nodes removed	None; diagnosed at autopsy	Radiation after surgery	Recommended but not performed, unknown reason	Beam radiation	Blank(s)	Blank(s)	Blank(s)	Blank(s)	Blank(s)	24	100	200	0	0	0	Blank(s)
457	45	1965	2010	Female	White	C34.1-Upper lobe, lung	8013/3: Large cell neuroendocrine carcinoma	Unknown	8.3 Carcinoma of trachea,bronchus, and lung	Unclassified	XI(f) Other and unspecified carcinomas	Right - origin of primary	Positive histology	IV	IV	Blank(s)	Blank(s)	T1b	N2	M1b	T1	N2	M1	Blank(s)	Blank(s)	Blank(s)	D	D	Distant	Blank(s)	Blank(s)	0	None	Non-primary surgical procedure to distant site	Radiation after surgery	Not recommended	Beam radiation	Blank(s)	Blank(s)	Blank(s)	Blank(s)	Blank(s)	28	100	200	40	0	0	Blank(s)
458	63	1947	2010	Female	White	C34.1-Upper lobe, lung	8013/3: Large cell neuroendocrine carcinoma	Unknown	8.3 Carcinoma of trachea,bronchus, and lung	Unclassified	XI(f) Other and unspecified carcinomas	Right - origin of primary	Positive histology	IV	IV	Blank(s)	Blank(s)	T2NOS	N3	M1b	T2	N3	M1	Blank(s)	Blank(s)	Blank(s)	D	D	Distant	Blank(s)	Blank(s)	0	None	None; diagnosed at autopsy	No radiation and/or cancer-directed surgery	Not recommended	None	Blank(s)	Blank(s)	Blank(s)	Blank(s)	Blank(s)	999	400	600	51	0	998	Blank(s)
459	62	1947	2010	Female	White	C34.1-Upper lobe, lung	8013/3: Large cell neuroendocrine carcinoma	Unknown	8.3 Carcinoma of trachea,bronchus, and lung	Unclassified	XI(f) Other and unspecified carcinomas	Right - origin of primary	Positive histology	IV	IV	Blank(s)	Blank(s)	T1b	N2	M1b	T1	N2	M1	Blank(s)	Blank(s)	Blank(s)	D	D	Distant	Blank(s)	Blank(s)	0	None	None; diagnosed at autopsy	No radiation and/or cancer-directed surgery	Recommended but not performed, unknown reason	Radiation, NOS method or source not specified	Blank(s)	Blank(s)	Blank(s)	Blank(s)	Blank(s)	26	100	200	40	0	998	Blank(s)
460	60	1950	2010	Female	White	C34.2-Middle lobe, lung	8013/3: Large cell neuroendocrine carcinoma	Unknown	8.3 Carcinoma of trachea,bronchus, and lung	Unclassified	XI(f) Other and unspecified carcinomas	Right - origin of primary	Positive histology	IV	IV	Blank(s)	Blank(s)	T2a	N0	M1b	T2	N0	M1	Blank(s)	Blank(s)	Blank(s)	D	D	Distant	Blank(s)	Blank(s)	0	None	None; diagnosed at autopsy	No radiation and/or cancer-directed surgery	Recommended but not performed, unknown reason	None	Blank(s)	Blank(s)	Blank(s)	Blank(s)	Blank(s)	37	410	0	40	0	0	Blank(s)
461	66	1944	2010	Female	White	C34.1-Upper lobe, lung	8013/3: Large cell neuroendocrine carcinoma	Unknown	8.3 Carcinoma of trachea,bronchus, and lung	Unclassified	XI(f) Other and unspecified carcinomas	Right - origin of primary	Positive histology	IV	IV	Blank(s)	Blank(s)	T4	N2	M1b	T4	N2	M1	Blank(s)	Blank(s)	Blank(s)	D	D	Distant	Blank(s)	Blank(s)	0	None	None; diagnosed at autopsy	No radiation and/or cancer-directed surgery	Not recommended, contraindicated due to other cond; autopsy only (1973-2002)	Beam radiation	Blank(s)	Blank(s)	Blank(s)	Blank(s)	Blank(s)	999	700	200	51	0	998	Blank(s)
462	46	1964	2011	Female	Black	C34.1-Upper lobe, lung	8013/3: Large cell neuroendocrine carcinoma	Unknown	8.3 Carcinoma of trachea,bronchus, and lung	Unclassified	XI(f) Other and unspecified carcinomas	Right - origin of primary	Positive histology	IIIB	IIIB	Blank(s)	Blank(s)	T4	N2	M0	T4	N2	M0	Blank(s)	Blank(s)	Blank(s)	RE+RN	RE+RN	Regional	Blank(s)	Blank(s)	0	None	None; diagnosed at autopsy	No radiation and/or cancer-directed surgery	Not recommended	Beam radiation	Blank(s)	Blank(s)	Blank(s)	Blank(s)	Blank(s)	73	700	200	0	0	998	Blank(s)
463	45	1964	2009	Male	White	C34.9-Lung, NOS	8013/3: Large cell neuroendocrine carcinoma	Unknown	8.3 Carcinoma of trachea,bronchus, and lung	Unclassified	XI(f) Other and unspecified carcinomas	Bilateral, single primary	Positive histology	Blank(s)	IV	Blank(s)	Blank(s)	Blank(s)	Blank(s)	Blank(s)	T4	NX	M1	Blank(s)	Blank(s)	Blank(s)	D	D	Distant	Blank(s)	Blank(s)	0	None	None; diagnosed at autopsy	No radiation and/or cancer-directed surgery	Not recommended	None	Blank(s)	Blank(s)	Blank(s)	Blank(s)	Blank(s)	999	999	999	36	40	Blank(s)	Blank(s)
464	59	1952	2011	Female	Black	C34.1-Upper lobe, lung	8013/3: Large cell neuroendocrine carcinoma	Poorly differentiated; Grade III	8.3 Carcinoma of trachea,bronchus, and lung	Unclassified	XI(f) Other and unspecified carcinomas	Right - origin of primary	Positive histology	IB	IB	Blank(s)	Blank(s)	T2a	N0	M0	T2	N0	M0	Blank(s)	Blank(s)	Blank(s)	RE	RE	Regional	Blank(s)	Blank(s)	33	4 or more regional lymph nodes removed	None; diagnosed at autopsy	No radiation and/or cancer-directed surgery	Surgery performed	None	Blank(s)	Blank(s)	Blank(s)	Blank(s)	Blank(s)	17	430	0	0	0	20	Blank(s)
465	70	1940	2011	Male	White	C34.1-Upper lobe, lung	8013/3: Large cell neuroendocrine carcinoma	Unknown	8.3 Carcinoma of trachea,bronchus, and lung	Unclassified	XI(f) Other and unspecified carcinomas	Left - origin of primary	Positive histology	IA	IA	Blank(s)	Blank(s)	T1a	N0	M0	T1	N0	M0	Blank(s)	Blank(s)	Blank(s)	L	L	Localized	Blank(s)	Blank(s)	33	4 or more regional lymph nodes removed	None; diagnosed at autopsy	No radiation and/or cancer-directed surgery	Surgery performed	None	Blank(s)	Blank(s)	Blank(s)	Blank(s)	Blank(s)	9	100	0	0	0	0	Blank(s)
466	47	1964	2011	Male	Black	C34.1-Upper lobe, lung	8013/3: Large cell neuroendocrine carcinoma	Poorly differentiated; Grade III	8.3 Carcinoma of trachea,bronchus, and lung	Unclassified	XI(f) Other and unspecified carcinomas	Left - origin of primary	Positive histology	IIIB	IIIB	Blank(s)	Blank(s)	T4	N2	M0	T4	N2	M0	Blank(s)	Blank(s)	Blank(s)	RE+RN	RE+RN	Regional	Blank(s)	Blank(s)	0	None	None; diagnosed at autopsy	No radiation and/or cancer-directed surgery	Not recommended	Beam radiation	Blank(s)	Blank(s)	Blank(s)	Blank(s)	Blank(s)	82	700	200	0	0	998	Blank(s)
467	82	1929	2011	Female	White	C34.3-Lower lobe, lung	8013/3: Large cell neuroendocrine carcinoma	Poorly differentiated; Grade III	8.3 Carcinoma of trachea,bronchus, and lung	Unclassified	XI(f) Other and unspecified carcinomas	Right - origin of primary	Positive histology	IIB	IIB	Blank(s)	Blank(s)	T3	N0	M0	T3	N0	M0	Blank(s)	Blank(s)	Blank(s)	RE	RE	Regional	Blank(s)	Blank(s)	0	None	None; diagnosed at autopsy	No radiation and/or cancer-directed surgery	Not recommended	None	Blank(s)	Blank(s)	Blank(s)	Blank(s)	Blank(s)	17	520	0	0	0	998	Blank(s)
468	84	1926	2011	Male	White	C34.1-Upper lobe, lung	8013/3: Large cell neuroendocrine carcinoma	Unknown	8.3 Carcinoma of trachea,bronchus, and lung	Unclassified	XI(f) Other and unspecified carcinomas	Right - origin of primary	Positive histology	IV	IV	Blank(s)	Blank(s)	T4	N1	M1a	T2	N1	M1	Blank(s)	Blank(s)	Blank(s)	D	D	Distant	Blank(s)	Blank(s)	0	None	None; diagnosed at autopsy	No radiation and/or cancer-directed surgery	Not recommended	None	Blank(s)	Blank(s)	Blank(s)	Blank(s)	Blank(s)	34	430	100	15	20	998	Blank(s)
469	79	1931	2011	Female	White	C34.3-Lower lobe, lung	8013/3: Large cell neuroendocrine carcinoma	Poorly differentiated; Grade III	8.3 Carcinoma of trachea,bronchus, and lung	Unclassified	XI(f) Other and unspecified carcinomas	Left - origin of primary	Positive histology	IV	IV	Blank(s)	Blank(s)	T3	N0	M1b	T4	N0	M1	Blank(s)	Blank(s)	Blank(s)	D	D	Distant	Blank(s)	Blank(s)	0	None	None; diagnosed at autopsy	No radiation and/or cancer-directed surgery	Not performed, patient died prior to recommended surgery	Beam radiation	Blank(s)	Blank(s)	Blank(s)	Blank(s)	Blank(s)	33	100	0	40	10	998	Blank(s)
470	63	1948	2011	Male	White	C34.9-Lung, NOS	8013/3: Large cell neuroendocrine carcinoma	Unknown	8.3 Carcinoma of trachea,bronchus, and lung	Unclassified	XI(f) Other and unspecified carcinomas	Right - origin of primary	Positive histology	IA	IA	Blank(s)	Blank(s)	T1a	N0	M0	T1	N0	M0	Blank(s)	Blank(s)	Blank(s)	L	L	Localized	Blank(s)	Blank(s)	33	4 or more regional lymph nodes removed	None; diagnosed at autopsy	No radiation and/or cancer-directed surgery	Surgery performed	None	Blank(s)	Blank(s)	Blank(s)	Blank(s)	Blank(s)	13	100	0	0	0	0	Blank(s)
471	73	1937	2011	Female	Black	C34.3-Lower lobe, lung	8013/3: Large cell neuroendocrine carcinoma	Unknown	8.3 Carcinoma of trachea,bronchus, and lung	Unclassified	XI(f) Other and unspecified carcinomas	Left - origin of primary	Positive histology	IA	IA	Blank(s)	Blank(s)	T1b	N0	M0	T1	N0	M0	Blank(s)	Blank(s)	Blank(s)	L	L	Localized	Blank(s)	Blank(s)	0	None	None; diagnosed at autopsy	No radiation and/or cancer-directed surgery	Not recommended	None	Blank(s)	Blank(s)	Blank(s)	Blank(s)	Blank(s)	24	100	0	0	999	998	Blank(s)
472	48	1963	2012	Male	White	C34.1-Upper lobe, lung	8013/3: Large cell neuroendocrine carcinoma	Poorly differentiated; Grade III	8.3 Carcinoma of trachea,bronchus, and lung	Unclassified	XI(f) Other and unspecified carcinomas	Right - origin of primary	Positive histology	IIB	IB	Blank(s)	Blank(s)	T3	N0	M0	T2	N0	M0	Blank(s)	Blank(s)	Blank(s)	L	L	Localized	Blank(s)	Blank(s)	33	4 or more regional lymph nodes removed	Non-primary surgical procedure to other regional sites	No radiation and/or cancer-directed surgery	Surgery performed	None	Blank(s)	Blank(s)	Blank(s)	Blank(s)	Blank(s)	100	100	0	0	0	0	Blank(s)
473	71	1941	2012	Female	White	C34.1-Upper lobe, lung	8013/3: Large cell neuroendocrine carcinoma	Poorly differentiated; Grade III	8.3 Carcinoma of trachea,bronchus, and lung	Unclassified	XI(f) Other and unspecified carcinomas	Right - origin of primary	Positive histology	IV	IV	Blank(s)	Blank(s)	T4	N0	M1b	T4	N0	M1	Blank(s)	Blank(s)	Blank(s)	D	D	Distant	Blank(s)	Blank(s)	21	4 or more regional lymph nodes removed	None; diagnosed at autopsy	No radiation and/or cancer-directed surgery	Surgery performed	None	Blank(s)	Blank(s)	Blank(s)	Blank(s)	Blank(s)	42	410	0	51	30	998	Blank(s)
474	62	1949	2011	Male	White	C34.1-Upper lobe, lung	8013/3: Large cell neuroendocrine carcinoma	Unknown	8.3 Carcinoma of trachea,bronchus, and lung	Unclassified	XI(f) Other and unspecified carcinomas	Right - origin of primary	Positive histology	IV	IV	Blank(s)	Blank(s)	T4	N3	M1b	T4	N3	M1	Blank(s)	Blank(s)	Blank(s)	D	D	Distant	Blank(s)	Blank(s)	0	None	None; diagnosed at autopsy	No radiation and/or cancer-directed surgery	Not recommended	None	Blank(s)	Blank(s)	Blank(s)	Blank(s)	Blank(s)	38	700	600	40	0	0	Blank(s)
475	81	1930	2011	Male	White	C34.1-Upper lobe, lung	8013/3: Large cell neuroendocrine carcinoma	Unknown	8.3 Carcinoma of trachea,bronchus, and lung	Unclassified	XI(f) Other and unspecified carcinomas	Right - origin of primary	Positive histology	IB	IB	Blank(s)	Blank(s)	T2a	N0	M0	T2	N0	M0	Blank(s)	Blank(s)	Blank(s)	L	L	Localized	Blank(s)	Blank(s)	0	None	None; diagnosed at autopsy	No radiation and/or cancer-directed surgery	Not recommended	Beam radiation	Blank(s)	Blank(s)	Blank(s)	Blank(s)	Blank(s)	32	100	0	0	0	998	Blank(s)
476	53	1958	2011	Male	White	C34.1-Upper lobe, lung	8013/3: Large cell neuroendocrine carcinoma	Poorly differentiated; Grade III	8.3 Carcinoma of trachea,bronchus, and lung	Unclassified	XI(f) Other and unspecified carcinomas	Right - origin of primary	Positive histology	IV	IV	Blank(s)	Blank(s)	T4	N0	M1b	T4	N0	M1	Blank(s)	Blank(s)	Blank(s)	D	D	Distant	Blank(s)	Blank(s)	0	None	None; diagnosed at autopsy	No radiation and/or cancer-directed surgery	Not recommended	Beam radiation	Blank(s)	Blank(s)	Blank(s)	Blank(s)	Blank(s)	68	700	0	40	0	0	Blank(s)
477	56	1955	2011	Female	White	C34.3-Lower lobe, lung	8013/3: Large cell neuroendocrine carcinoma	Unknown	8.3 Carcinoma of trachea,bronchus, and lung	Unclassified	XI(f) Other and unspecified carcinomas	Left - origin of primary	Positive exfoliative cytology, no positive histology	IV	IV	Blank(s)	Blank(s)	T4	N2	M1b	T4	N2	M1	Blank(s)	Blank(s)	Blank(s)	D	D	Distant	Blank(s)	Blank(s)	0	None	None; diagnosed at autopsy	No radiation and/or cancer-directed surgery	Not recommended	Beam radiation	Blank(s)	Blank(s)	Blank(s)	Blank(s)	Blank(s)	20	700	200	43	40	998	Blank(s)
478	67	1944	2012	Female	Black	C34.3-Lower lobe, lung	8013/3: Large cell neuroendocrine carcinoma	Poorly differentiated; Grade III	8.3 Carcinoma of trachea,bronchus, and lung	Unclassified	XI(f) Other and unspecified carcinomas	Right - origin of primary	Positive histology	IA	IA	Blank(s)	Blank(s)	T1a	N0	M0	T1	N0	M0	Blank(s)	Blank(s)	Blank(s)	L	L	Localized	Blank(s)	Blank(s)	0	None	None; diagnosed at autopsy	No radiation and/or cancer-directed surgery	Not recommended	None	Blank(s)	Blank(s)	Blank(s)	Blank(s)	Blank(s)	14	100	0	0	0	998	Blank(s)
479	56	1955	2011	Female	White	C34.1-Upper lobe, lung	8013/3: Large cell neuroendocrine carcinoma	Unknown	8.3 Carcinoma of trachea,bronchus, and lung	Unclassified	XI(f) Other and unspecified carcinomas	Right - origin of primary	Positive histology	IV	IV	Blank(s)	Blank(s)	TX	NX	M1b	TX	NX	M1	Blank(s)	Blank(s)	Blank(s)	D	D	Distant	Blank(s)	Blank(s)	0	None	None; diagnosed at autopsy	No radiation and/or cancer-directed surgery	Not recommended	Beam radiation	Blank(s)	Blank(s)	Blank(s)	Blank(s)	Blank(s)	999	999	999	40	0	998	Blank(s)
480	69	1942	2011	Female	White	C34.3-Lower lobe, lung	8013/3: Large cell neuroendocrine carcinoma	Unknown	8.3 Carcinoma of trachea,bronchus, and lung	Unclassified	XI(f) Other and unspecified carcinomas	Right - origin of primary	Positive histology	IA	IA	Blank(s)	Blank(s)	T1a	N0	M0	T1	N0	M0	Blank(s)	Blank(s)	Blank(s)	L	L	Localized	Blank(s)	Blank(s)	33	4 or more regional lymph nodes removed	None; diagnosed at autopsy	No radiation and/or cancer-directed surgery	Surgery performed	None	Blank(s)	Blank(s)	Blank(s)	Blank(s)	Blank(s)	12	100	0	0	0	0	Blank(s)
481	76	1935	2011	Male	White	C34.3-Lower lobe, lung	8013/3: Large cell neuroendocrine carcinoma	Poorly differentiated; Grade III	8.3 Carcinoma of trachea,bronchus, and lung	Unclassified	XI(f) Other and unspecified carcinomas	Right - origin of primary	Positive histology	IIA	IB	Blank(s)	Blank(s)	T2b	N0	M0	T2	N0	M0	Blank(s)	Blank(s)	Blank(s)	RE	RE	Regional	Blank(s)	Blank(s)	33	4 or more regional lymph nodes removed	None; diagnosed at autopsy	No radiation and/or cancer-directed surgery	Surgery performed	None	Blank(s)	Blank(s)	Blank(s)	Blank(s)	Blank(s)	56	430	0	0	0	40	Blank(s)
482	63	1948	2011	Male	White	C34.3-Lower lobe, lung	8013/3: Large cell neuroendocrine carcinoma	Unknown	8.3 Carcinoma of trachea,bronchus, and lung	Unclassified	XI(f) Other and unspecified carcinomas	Left - origin of primary	Positive exfoliative cytology, no positive histology	IV	IV	Blank(s)	Blank(s)	T2a	N3	M1b	T2	N3	M1	Blank(s)	Blank(s)	Blank(s)	D	D	Distant	Blank(s)	Blank(s)	0	Biopsy or aspiration of regional lymph node, NOS	None; diagnosed at autopsy	No radiation and/or cancer-directed surgery	Not recommended	Refused	Blank(s)	Blank(s)	Blank(s)	Blank(s)	Blank(s)	48	100	600	40	0	998	Blank(s)
483	71	1940	2012	Male	White	C34.1-Upper lobe, lung	8013/3: Large cell neuroendocrine carcinoma	Poorly differentiated; Grade III	8.3 Carcinoma of trachea,bronchus, and lung	Unclassified	XI(f) Other and unspecified carcinomas	Right - origin of primary	Positive exfoliative cytology, no positive histology	IV	IV	Blank(s)	Blank(s)	T3	N2	M1b	T4	N2	M1	Blank(s)	Blank(s)	Blank(s)	D	D	Distant	Blank(s)	Blank(s)	0	None	None; diagnosed at autopsy	No radiation and/or cancer-directed surgery	Not recommended	None	Blank(s)	Blank(s)	Blank(s)	Blank(s)	Blank(s)	18	400	200	42	10	998	Blank(s)
484	75	1936	2012	Female	White	C34.9-Lung, NOS	8013/3: Large cell neuroendocrine carcinoma	Unknown	8.3 Carcinoma of trachea,bronchus, and lung	Unclassified	XI(f) Other and unspecified carcinomas	Bilateral, single primary	Positive histology	IV	IV	Blank(s)	Blank(s)	T3	N3	M1b	T4	N3	M1	Blank(s)	Blank(s)	Blank(s)	D	D	Distant	Blank(s)	Blank(s)	0	None	None; diagnosed at autopsy	No radiation and/or cancer-directed surgery	Not recommended	None	Blank(s)	Blank(s)	Blank(s)	Blank(s)	Blank(s)	999	400	600	52	40	998	Blank(s)
485	67	1944	2012	Female	White	C34.3-Lower lobe, lung	8013/3: Large cell neuroendocrine carcinoma	Undifferentiated; anaplastic; Grade IV	8.3 Carcinoma of trachea,bronchus, and lung	Unclassified	XI(f) Other and unspecified carcinomas	Right - origin of primary	Positive histology	IV	IV	Blank(s)	Blank(s)	T4	N0	M1b	T2	N0	M1	Blank(s)	Blank(s)	Blank(s)	D	D	Distant	Blank(s)	Blank(s)	0	None	None; diagnosed at autopsy	No radiation and/or cancer-directed surgery	Not recommended	Beam radiation	Blank(s)	Blank(s)	Blank(s)	Blank(s)	Blank(s)	52	300	0	40	20	998	Blank(s)
486	64	1948	2012	Female	White	C34.1-Upper lobe, lung	8013/3: Large cell neuroendocrine carcinoma	Poorly differentiated; Grade III	8.3 Carcinoma of trachea,bronchus, and lung	Unclassified	XI(f) Other and unspecified carcinomas	Left - origin of primary	Positive histology	IIIA	IIIB	Blank(s)	Blank(s)	T4	N1	M0	T4	N1	M0	Blank(s)	Blank(s)	Blank(s)	RE+RN	RE+RN	Regional	Blank(s)	Blank(s)	33	4 or more regional lymph nodes removed	None; diagnosed at autopsy	Radiation prior to surgery	Surgery performed	Beam radiation	Blank(s)	Blank(s)	Blank(s)	Blank(s)	Blank(s)	82	700	100	0	0	30	Blank(s)
487	62	1949	2012	Male	Black	C34.3-Lower lobe, lung	8013/3: Large cell neuroendocrine carcinoma	Poorly differentiated; Grade III	8.3 Carcinoma of trachea,bronchus, and lung	Unclassified	XI(f) Other and unspecified carcinomas	Left - origin of primary	Positive histology	IA	IA	Blank(s)	Blank(s)	T1a	N0	M0	T1	N0	M0	Blank(s)	Blank(s)	Blank(s)	L	L	Localized	Blank(s)	Blank(s)	33	4 or more regional lymph nodes removed	None; diagnosed at autopsy	No radiation and/or cancer-directed surgery	Surgery performed	None	Blank(s)	Blank(s)	Blank(s)	Blank(s)	Blank(s)	37	110	0	0	0	0	Blank(s)
488	55	1957	2013	Female	White	C34.1-Upper lobe, lung	8013/3: Large cell neuroendocrine carcinoma	Undifferentiated; anaplastic; Grade IV	8.3 Carcinoma of trachea,bronchus, and lung	Unclassified	XI(f) Other and unspecified carcinomas	Left - origin of primary	Positive histology	IIB	IIIB	Blank(s)	Blank(s)	T3	N0	M0	T4	N0	M0	Blank(s)	Blank(s)	Blank(s)	RE	RE	Regional	Blank(s)	Blank(s)	22	1 to 3 regional lymph nodes removed	None; diagnosed at autopsy	No radiation and/or cancer-directed surgery	Surgery performed	None	Blank(s)	Blank(s)	Blank(s)	Blank(s)	Blank(s)	10	420	0	0	10	20	Blank(s)
489	64	1948	2012	Male	White	C34.1-Upper lobe, lung	8013/3: Large cell neuroendocrine carcinoma	Poorly differentiated; Grade III	8.3 Carcinoma of trachea,bronchus, and lung	Unclassified	XI(f) Other and unspecified carcinomas	Left - origin of primary	Positive histology	IA	IA	Blank(s)	Blank(s)	T1a	N0	M0	T1	N0	M0	Blank(s)	Blank(s)	Blank(s)	L	L	Localized	Blank(s)	Blank(s)	21	1 to 3 regional lymph nodes removed	None; diagnosed at autopsy	No radiation and/or cancer-directed surgery	Surgery performed	None	Blank(s)	Blank(s)	Blank(s)	Blank(s)	Blank(s)	13	100	0	0	0	0	Blank(s)
490	78	1934	2012	Female	White	C34.3-Lower lobe, lung	8013/3: Large cell neuroendocrine carcinoma	Unknown	8.3 Carcinoma of trachea,bronchus, and lung	Unclassified	XI(f) Other and unspecified carcinomas	Right - origin of primary	Positive histology	IV	IV	Blank(s)	Blank(s)	T2a	N0	M1b	T2	N0	M1	Blank(s)	Blank(s)	Blank(s)	D	D	Distant	Blank(s)	Blank(s)	0	None	None; diagnosed at autopsy	No radiation and/or cancer-directed surgery	Not recommended	None	Blank(s)	Blank(s)	Blank(s)	Blank(s)	Blank(s)	37	100	0	40	0	998	Blank(s)
491	59	1953	2012	Female	White	C34.3-Lower lobe, lung	8013/3: Large cell neuroendocrine carcinoma	Poorly differentiated; Grade III	8.3 Carcinoma of trachea,bronchus, and lung	Unclassified	XI(f) Other and unspecified carcinomas	Right - origin of primary	Positive histology	IB	IB	Blank(s)	Blank(s)	T2a	N0	M0	T2	N0	M0	Blank(s)	Blank(s)	Blank(s)	L	L	Localized	Blank(s)	Blank(s)	30	1 to 3 regional lymph nodes removed	None; diagnosed at autopsy	No radiation and/or cancer-directed surgery	Surgery performed	None	Blank(s)	Blank(s)	Blank(s)	Blank(s)	Blank(s)	35	100	0	0	0	998	Blank(s)
492	69	1941	2011	Female	White	C34.1-Upper lobe, lung	8013/3: Large cell neuroendocrine carcinoma	Unknown	8.3 Carcinoma of trachea,bronchus, and lung	Unclassified	XI(f) Other and unspecified carcinomas	Left - origin of primary	Positive histology	IA	IA	Blank(s)	Blank(s)	T1a	N0	M0	T1	N0	M0	Blank(s)	Blank(s)	Blank(s)	L	L	Localized	Blank(s)	Blank(s)	21	1 to 3 regional lymph nodes removed	None; diagnosed at autopsy	No radiation and/or cancer-directed surgery	Surgery performed	None	Blank(s)	Blank(s)	Blank(s)	Blank(s)	Blank(s)	8	100	0	0	0	999	Blank(s)
493	53	1960	2013	Male	Black	C34.9-Lung, NOS	8013/3: Large cell neuroendocrine carcinoma	Poorly differentiated; Grade III	8.3 Carcinoma of trachea,bronchus, and lung	Unclassified	XI(f) Other and unspecified carcinomas	Right - origin of primary	Positive exfoliative cytology, no positive histology	IV	IV	Blank(s)	Blank(s)	T4	N2	M1b	T4	N2	M1	Blank(s)	Blank(s)	Blank(s)	D	D	Distant	Blank(s)	Blank(s)	0	Biopsy or aspiration of regional lymph node, NOS	None; diagnosed at autopsy	No radiation and/or cancer-directed surgery	Not recommended	None	Blank(s)	Blank(s)	Blank(s)	Blank(s)	Blank(s)	37	400	200	42	30	998	Blank(s)
494	69	1943	2012	Female	White	C34.1-Upper lobe, lung	8013/3: Large cell neuroendocrine carcinoma	Poorly differentiated; Grade III	8.3 Carcinoma of trachea,bronchus, and lung	Unclassified	XI(f) Other and unspecified carcinomas	Left - origin of primary	Positive histology	IA	IA	Blank(s)	Blank(s)	T1b	N0	M0	T1	N0	M0	Blank(s)	Blank(s)	Blank(s)	L	L	Localized	Blank(s)	Blank(s)	30	4 or more regional lymph nodes removed	None; diagnosed at autopsy	No radiation and/or cancer-directed surgery	Surgery performed	None	Blank(s)	Blank(s)	Blank(s)	Blank(s)	Blank(s)	25	100	0	0	0	0	Blank(s)
495	65	1948	2013	Male	Black	C34.9-Lung, NOS	8013/3: Large cell neuroendocrine carcinoma	Unknown	8.3 Carcinoma of trachea,bronchus, and lung	Unclassified	XI(f) Other and unspecified carcinomas	Left - origin of primary	Positive histology	IV	IV	Blank(s)	Blank(s)	T4	N2	M1a	T4	N2	M1	Blank(s)	Blank(s)	Blank(s)	D	D	Distant	Blank(s)	Blank(s)	0	None	None; diagnosed at autopsy	No radiation and/or cancer-directed surgery	Not recommended	Beam radiation	Blank(s)	Blank(s)	Blank(s)	Blank(s)	Blank(s)	95	700	200	23	0	998	Blank(s)
496	68	1944	2013	Male	White	C34.3-Lower lobe, lung	8013/3: Large cell neuroendocrine carcinoma	Poorly differentiated; Grade III	8.3 Carcinoma of trachea,bronchus, and lung	Unclassified	XI(f) Other and unspecified carcinomas	Left - origin of primary	Positive histology	IV	IV	Blank(s)	Blank(s)	T3	N2	M1b	T2	N2	M1	Blank(s)	Blank(s)	Blank(s)	D	D	Distant	Blank(s)	Blank(s)	20	Biopsy or aspiration of regional lymph node, NOS	None; diagnosed at autopsy	Radiation after surgery	Surgery performed	Beam radiation	Blank(s)	Blank(s)	Blank(s)	Blank(s)	Blank(s)	90	100	200	40	0	998	Blank(s)
497	77	1935	2012	Female	Black	C34.0-Main bronchus	8013/3: Large cell neuroendocrine carcinoma	Poorly differentiated; Grade III	8.3 Carcinoma of trachea,bronchus, and lung	Unclassified	XI(f) Other and unspecified carcinomas	Right - origin of primary	Positive histology	IV	IV	Blank(s)	Blank(s)	T4	N3	M1b	T4	N3	M1	Blank(s)	Blank(s)	Blank(s)	D	D	Distant	Blank(s)	Blank(s)	24	None	None; diagnosed at autopsy	Radiation after surgery	Surgery performed	Beam radiation	Blank(s)	Blank(s)	Blank(s)	Blank(s)	Blank(s)	999	710	600	40	0	998	Blank(s)
498	59	1953	2013	Male	White	C34.9-Lung, NOS	8013/3: Large cell neuroendocrine carcinoma	Unknown	8.3 Carcinoma of trachea,bronchus, and lung	Unclassified	XI(f) Other and unspecified carcinomas	Bilateral, single primary	Positive histology	IV	IV	Blank(s)	Blank(s)	T4	N0	M1b	T1	N0	M1	Blank(s)	Blank(s)	Blank(s)	D	D	Distant	Blank(s)	Blank(s)	30	None	Non-primary surgical procedure to distant site	Radiation after surgery	Surgery performed	Beam radiation	Blank(s)	Blank(s)	Blank(s)	Blank(s)	Blank(s)	30	300	0	41	20	998	Blank(s)
499	58	1954	2013	Female	Black	C34.1-Upper lobe, lung	8013/3: Large cell neuroendocrine carcinoma	Poorly differentiated; Grade III	8.3 Carcinoma of trachea,bronchus, and lung	Unclassified	XI(f) Other and unspecified carcinomas	Right - origin of primary	Positive histology	IA	IA	Blank(s)	Blank(s)	T1b	N0	M0	T1	N0	M0	Blank(s)	Blank(s)	Blank(s)	L	L	Localized	Blank(s)	Blank(s)	30	4 or more regional lymph nodes removed	None; diagnosed at autopsy	No radiation and/or cancer-directed surgery	Surgery performed	None	Blank(s)	Blank(s)	Blank(s)	Blank(s)	Blank(s)	25	100	0	0	0	0	Blank(s)
500	75	1937	2013	Male	Black	C34.3-Lower lobe, lung	8013/3: Large cell neuroendocrine carcinoma	Unknown	8.3 Carcinoma of trachea,bronchus, and lung	Unclassified	XI(f) Other and unspecified carcinomas	Right - origin of primary	Positive histology	IV	IV	Blank(s)	Blank(s)	T4	N2	M1b	T4	N2	M1	Blank(s)	Blank(s)	Blank(s)	D	D	Distant	Blank(s)	Blank(s)	0	None	None; diagnosed at autopsy	No radiation and/or cancer-directed surgery	Not recommended	None	Blank(s)	Blank(s)	Blank(s)	Blank(s)	Blank(s)	40	400	200	40	30	998	Blank(s)
501	58	1954	2013	Male	White	C34.3-Lower lobe, lung	8013/3: Large cell neuroendocrine carcinoma	Poorly differentiated; Grade III	8.3 Carcinoma of trachea,bronchus, and lung	Unclassified	XI(f) Other and unspecified carcinomas	Left - origin of primary	Positive histology	IV	IV	Blank(s)	Blank(s)	T4	N3	M1a	T4	N3	M1	Blank(s)	Blank(s)	Blank(s)	D	D	Distant	Blank(s)	Blank(s)	0	Biopsy or aspiration of regional lymph node, NOS	None; diagnosed at autopsy	No radiation and/or cancer-directed surgery	Not recommended	None	Blank(s)	Blank(s)	Blank(s)	Blank(s)	Blank(s)	120	750	600	23	0	998	Blank(s)
502	72	1940	2013	Female	White	C34.1-Upper lobe, lung	8013/3: Large cell neuroendocrine carcinoma	Unknown	8.3 Carcinoma of trachea,bronchus, and lung	Unclassified	XI(f) Other and unspecified carcinomas	Right - origin of primary	Positive histology	IV	IV	Blank(s)	Blank(s)	T3	N2	M1b	T4	N2	M1	Blank(s)	Blank(s)	Blank(s)	D	D	Distant	Blank(s)	Blank(s)	0	Biopsy or aspiration of regional lymph node, NOS	None; diagnosed at autopsy	No radiation and/or cancer-directed surgery	Not recommended, contraindicated due to other cond; autopsy only (1973-2002)	None	Blank(s)	Blank(s)	Blank(s)	Blank(s)	Blank(s)	40	300	200	40	10	998	Blank(s)
503	63	1949	2013	Female	White	C34.1-Upper lobe, lung	8013/3: Large cell neuroendocrine carcinoma	Unknown	8.3 Carcinoma of trachea,bronchus, and lung	Unclassified	XI(f) Other and unspecified carcinomas	Right - origin of primary	Positive histology	IV	IV	Blank(s)	Blank(s)	T4	N2	M1b	T4	N2	M1	Blank(s)	Blank(s)	Blank(s)	D	D	Distant	Blank(s)	Blank(s)	0	None	Non-primary surgical procedure to distant site	Radiation after surgery	Not recommended	Beam radiation	Blank(s)	Blank(s)	Blank(s)	Blank(s)	Blank(s)	90	700	200	40	0	998	Blank(s)
504	79	1934	2013	Female	White	C34.3-Lower lobe, lung	8013/3: Large cell neuroendocrine carcinoma	Undifferentiated; anaplastic; Grade IV	8.3 Carcinoma of trachea,bronchus, and lung	Unclassified	XI(f) Other and unspecified carcinomas	Left - origin of primary	Positive histology	IIB	IIIB	Blank(s)	Blank(s)	T3	N0	M0	T4	N0	M0	Blank(s)	Blank(s)	Blank(s)	L	RE	Regional	Blank(s)	Blank(s)	33	4 or more regional lymph nodes removed	None; diagnosed at autopsy	No radiation and/or cancer-directed surgery	Surgery performed	None	Blank(s)	Blank(s)	Blank(s)	Blank(s)	Blank(s)	26	100	0	0	10	998	Blank(s)
505	71	1942	2013	Male	Black	C34.2-Middle lobe, lung	8013/3: Large cell neuroendocrine carcinoma	Poorly differentiated; Grade III	8.3 Carcinoma of trachea,bronchus, and lung	Unclassified	XI(f) Other and unspecified carcinomas	Right - origin of primary	Positive histology	IA	IA	Blank(s)	Blank(s)	T1b	N0	M0	T1	N0	M0	Blank(s)	Blank(s)	Blank(s)	L	L	Localized	Blank(s)	Blank(s)	21	1 to 3 regional lymph nodes removed	None; diagnosed at autopsy	No radiation and/or cancer-directed surgery	Surgery performed	None	Blank(s)	Blank(s)	Blank(s)	Blank(s)	Blank(s)	23	100	0	0	0	0	Blank(s)
506	84	1929	2013	Female	Black	C34.1-Upper lobe, lung	8013/3: Large cell neuroendocrine carcinoma	Poorly differentiated; Grade III	8.3 Carcinoma of trachea,bronchus, and lung	Unclassified	XI(f) Other and unspecified carcinomas	Left - origin of primary	Positive histology	IV	IV	Blank(s)	Blank(s)	T4	N2	M1b	T4	N2	M1	Blank(s)	Blank(s)	Blank(s)	D	D	Distant	Blank(s)	Blank(s)	0	None	None; diagnosed at autopsy	No radiation and/or cancer-directed surgery	Recommended but not performed, patient refused	Refused	Blank(s)	Blank(s)	Blank(s)	Blank(s)	Blank(s)	57	700	200	42	10	998	Blank(s)
507	56	1957	2013	Male	White	C34.0-Main bronchus	8013/3: Large cell neuroendocrine carcinoma	Poorly differentiated; Grade III	8.3 Carcinoma of trachea,bronchus, and lung	Unclassified	XI(f) Other and unspecified carcinomas	Left - origin of primary	Positive histology	IV	IV	Blank(s)	Blank(s)	T4	N2	M1b	T4	N2	M1	Blank(s)	Blank(s)	Blank(s)	D	D	Distant	Blank(s)	Blank(s)	0	None	Non-primary surgical procedure to distant site	No radiation and/or cancer-directed surgery	Not recommended	None	Blank(s)	Blank(s)	Blank(s)	Blank(s)	Blank(s)	70	700	200	40	0	998	Blank(s)
508	52	1961	2013	Female	White	C34.9-Lung, NOS	8013/3: Large cell neuroendocrine carcinoma	Unknown	8.3 Carcinoma of trachea,bronchus, and lung	Unclassified	XI(f) Other and unspecified carcinomas	Left - origin of primary	Positive histology	IV	IV	Blank(s)	Blank(s)	TX	N2	M1b	TX	N2	M1	Blank(s)	Blank(s)	Blank(s)	D	D	Distant	Blank(s)	Blank(s)	0	None	None; diagnosed at autopsy	No radiation and/or cancer-directed surgery	Not recommended	Beam radiation	Blank(s)	Blank(s)	Blank(s)	Blank(s)	Blank(s)	999	999	200	40	0	998	Blank(s)
509	54	1959	2013	Female	Black	C34.3-Lower lobe, lung	8013/3: Large cell neuroendocrine carcinoma	Unknown	8.3 Carcinoma of trachea,bronchus, and lung	Unclassified	XI(f) Other and unspecified carcinomas	Left - origin of primary	Positive histology	IB	IB	Blank(s)	Blank(s)	T2a	N0	M0	T2	N0	M0	Blank(s)	Blank(s)	Blank(s)	L	L	Localized	Blank(s)	Blank(s)	0	None	None; diagnosed at autopsy	No radiation and/or cancer-directed surgery	Not recommended	None	Blank(s)	Blank(s)	Blank(s)	Blank(s)	Blank(s)	37	100	0	0	0	998	Blank(s)
510	55	1958	2013	Male	White	C34.1-Upper lobe, lung	8013/3: Large cell neuroendocrine carcinoma	Unknown	8.3 Carcinoma of trachea,bronchus, and lung	Unclassified	XI(f) Other and unspecified carcinomas	Right - origin of primary	Positive histology	IV	IV	Blank(s)	Blank(s)	T1b	N0	M1b	T1	N0	M1	Blank(s)	Blank(s)	Blank(s)	D	D	Distant	Blank(s)	Blank(s)	0	None	Non-primary surgical procedure to distant site	Radiation after surgery	Not recommended	Beam radiation	Blank(s)	Blank(s)	Blank(s)	Blank(s)	Blank(s)	23	100	0	51	0	998	Blank(s)
511	80	1923	2004	Female	Other (American Indian/AK Native, Asian/Pacific Islander)	C34.3-Lower lobe, lung	8013/3: Large cell neuroendocrine carcinoma	Unknown	8.3 Carcinoma of trachea,bronchus, and lung	Unclassified	XI(f) Other and unspecified carcinomas	Right - origin of primary	Positive histology	Blank(s)	IIIB	Blank(s)	Blank(s)	Blank(s)	Blank(s)	Blank(s)	T4	N2	M0	Blank(s)	Blank(s)	Blank(s)	RN	RE+RN	Regional	Blank(s)	Blank(s)	0	None	None; diagnosed at autopsy	No radiation and/or cancer-directed surgery	Not recommended	Beam radiation	Blank(s)	Blank(s)	Blank(s)	Blank(s)	Blank(s)	60	650	200	0	988	Blank(s)	Blank(s)
512	55	1957	2012	Male	Other (American Indian/AK Native, Asian/Pacific Islander)	C34.1-Upper lobe, lung	8013/3: Large cell neuroendocrine carcinoma	Poorly differentiated; Grade III	8.3 Carcinoma of trachea,bronchus, and lung	Unclassified	XI(f) Other and unspecified carcinomas	Right - origin of primary	Positive histology	IIB	IIB	Blank(s)	Blank(s)	T3	N0	M0	T3	N0	M0	Blank(s)	Blank(s)	Blank(s)	RE	RE	Regional	Blank(s)	Blank(s)	33	4 or more regional lymph nodes removed	None; diagnosed at autopsy	No radiation and/or cancer-directed surgery	Surgery performed	None	Blank(s)	Blank(s)	Blank(s)	Blank(s)	Blank(s)	117	570	0	0	999	0	Blank(s)
513	65	1940	2006	Female	Other (American Indian/AK Native, Asian/Pacific Islander)	C34.1-Upper lobe, lung	8013/3: Large cell neuroendocrine carcinoma	Poorly differentiated; Grade III	8.3 Carcinoma of trachea,bronchus, and lung	Unclassified	XI(f) Other and unspecified carcinomas	Right - origin of primary	Positive histology	Blank(s)	IB	Blank(s)	Blank(s)	Blank(s)	Blank(s)	Blank(s)	T2	N0	M0	Blank(s)	Blank(s)	Blank(s)	RE	RE	Regional	Blank(s)	Blank(s)	33	4 or more regional lymph nodes removed	None; diagnosed at autopsy	No radiation and/or cancer-directed surgery	Surgery performed	None	Blank(s)	Blank(s)	Blank(s)	Blank(s)	Blank(s)	14	450	0	0	988	Blank(s)	Blank(s)
514	78	1932	2010	Male	White	C34.1-Upper lobe, lung	8013/3: Large cell neuroendocrine carcinoma	Unknown	8.3 Carcinoma of trachea,bronchus, and lung	Unclassified	XI(f) Other and unspecified carcinomas	Left - origin of primary	Positive histology	IV	IV	Blank(s)	Blank(s)	T1b	N0	M1b	T1	N0	M1	Blank(s)	Blank(s)	Blank(s)	D	D	Distant	Blank(s)	Blank(s)	0	None	None; diagnosed at autopsy	No radiation and/or cancer-directed surgery	Not recommended, contraindicated due to other cond; autopsy only (1973-2002)	Beam radiation	Blank(s)	Blank(s)	Blank(s)	Blank(s)	Blank(s)	24	120	0	40	0	998	Blank(s)
515	56	1944	2001	Male	Other (American Indian/AK Native, Asian/Pacific Islander)	C34.0-Main bronchus	8013/3: Large cell neuroendocrine carcinoma	Unknown	8.3 Carcinoma of trachea,bronchus, and lung	Unclassified	XI(f) Other and unspecified carcinomas	Right - origin of primary	Positive histology	Blank(s)	Blank(s)	40	40	Blank(s)	Blank(s)	Blank(s)	Blank(s)	Blank(s)	Blank(s)	TX	N3	M1	Blank(s)	Blank(s)	Distant	Distant site(s)/node(s) involved	Blank(s)	0	Blank(s)	Blank(s)	No radiation and/or cancer-directed surgery	Not recommended	Recommended, unknown if administered	0	0	0	Blank(s)	Blank(s)	Blank(s)	Blank(s)	Blank(s)	Blank(s)	Blank(s)	Blank(s)	Blank(s)
516	78	1923	2001	Male	Other (American Indian/AK Native, Asian/Pacific Islander)	C34.1-Upper lobe, lung	8013/3: Large cell neuroendocrine carcinoma	Unknown	8.3 Carcinoma of trachea,bronchus, and lung	Unclassified	XI(f) Other and unspecified carcinomas	Left - origin of primary	Positive histology	Blank(s)	Blank(s)	32	32	Blank(s)	Blank(s)	Blank(s)	Blank(s)	Blank(s)	Blank(s)	T4	N2	M0	Blank(s)	Blank(s)	Regional	Regional by both direct extension and lymph node involvement	Blank(s)	0	Blank(s)	Blank(s)	No radiation and/or cancer-directed surgery	Not recommended	Beam radiation	0	0	0	Blank(s)	Blank(s)	Blank(s)	Blank(s)	Blank(s)	Blank(s)	Blank(s)	Blank(s)	Blank(s)
517	58	1943	2001	Male	Other (American Indian/AK Native, Asian/Pacific Islander)	C34.2-Middle lobe, lung	8013/3: Large cell neuroendocrine carcinoma	Unknown	8.3 Carcinoma of trachea,bronchus, and lung	Unclassified	XI(f) Other and unspecified carcinomas	Right - origin of primary	Positive histology	Blank(s)	Blank(s)	40	40	Blank(s)	Blank(s)	Blank(s)	Blank(s)	Blank(s)	Blank(s)	TX	N0	M1	Blank(s)	Blank(s)	Distant	Distant site(s)/node(s) involved	Blank(s)	0	Blank(s)	Blank(s)	Radiation after surgery	Surgery performed	Beam radiation	0	0	6	Blank(s)	Blank(s)	Blank(s)	Blank(s)	Blank(s)	Blank(s)	Blank(s)	Blank(s)	Blank(s)
518	83	1918	2001	Female	White	C34.1-Upper lobe, lung	8013/3: Large cell neuroendocrine carcinoma	Unknown	8.3 Carcinoma of trachea,bronchus, and lung	Unclassified	XI(f) Other and unspecified carcinomas	Left - origin of primary	Positive exfoliative cytology, no positive histology	Blank(s)	Blank(s)	31	31	Blank(s)	Blank(s)	Blank(s)	Blank(s)	Blank(s)	Blank(s)	T2	N2	M0	Blank(s)	Blank(s)	Regional	Regional lymph nodes involved only	Blank(s)	0	Blank(s)	Blank(s)	No radiation and/or cancer-directed surgery	Not recommended, contraindicated due to other cond; autopsy only (1973-2002)	Refused	0	0	0	Blank(s)	Blank(s)	Blank(s)	Blank(s)	Blank(s)	Blank(s)	Blank(s)	Blank(s)	Blank(s)
519	68	1934	2002	Male	Other (American Indian/AK Native, Asian/Pacific Islander)	C34.9-Lung, NOS	8013/3: Large cell neuroendocrine carcinoma	Unknown	8.3 Carcinoma of trachea,bronchus, and lung	Unclassified	XI(f) Other and unspecified carcinomas	Right - origin of primary	Positive histology	Blank(s)	Blank(s)	40	40	Blank(s)	Blank(s)	Blank(s)	Blank(s)	Blank(s)	Blank(s)	TX	N2	M1	Blank(s)	Blank(s)	Distant	Distant site(s)/node(s) involved	Blank(s)	0	Blank(s)	Blank(s)	No radiation and/or cancer-directed surgery	Not recommended	None	0	0	0	Blank(s)	Blank(s)	Blank(s)	Blank(s)	Blank(s)	Blank(s)	Blank(s)	Blank(s)	Blank(s)
520	79	1923	2002	Male	Other (American Indian/AK Native, Asian/Pacific Islander)	C34.2-Middle lobe, lung	8013/3: Large cell neuroendocrine carcinoma	Poorly differentiated; Grade III	8.3 Carcinoma of trachea,bronchus, and lung	Unclassified	XI(f) Other and unspecified carcinomas	Right - origin of primary	Positive histology	Blank(s)	Blank(s)	90	10	Blank(s)	Blank(s)	Blank(s)	Blank(s)	Blank(s)	Blank(s)	T2	NX	M0	Blank(s)	Blank(s)	Regional	Regional by direct extension only	Blank(s)	0	Blank(s)	Blank(s)	No radiation and/or cancer-directed surgery	Recommended but not performed, unknown reason	Beam radiation	0	0	0	Blank(s)	Blank(s)	Blank(s)	Blank(s)	Blank(s)	Blank(s)	Blank(s)	Blank(s)	Blank(s)
521	68	1934	2002	Male	Other (American Indian/AK Native, Asian/Pacific Islander)	C34.1-Upper lobe, lung	8013/3: Large cell neuroendocrine carcinoma	Poorly differentiated; Grade III	8.3 Carcinoma of trachea,bronchus, and lung	Unclassified	XI(f) Other and unspecified carcinomas	Right - origin of primary	Positive histology	Blank(s)	Blank(s)	32	32	Blank(s)	Blank(s)	Blank(s)	Blank(s)	Blank(s)	Blank(s)	T4	N0	M0	Blank(s)	Blank(s)	Regional	Regional by direct extension only	Blank(s)	21	Blank(s)	Blank(s)	No radiation and/or cancer-directed surgery	Surgery performed	None	4	4	0	Blank(s)	Blank(s)	Blank(s)	Blank(s)	Blank(s)	Blank(s)	Blank(s)	Blank(s)	Blank(s)
522	59	1944	2003	Male	Other (American Indian/AK Native, Asian/Pacific Islander)	C34.1-Upper lobe, lung	8013/3: Large cell neuroendocrine carcinoma	Unknown	8.3 Carcinoma of trachea,bronchus, and lung	Unclassified	XI(f) Other and unspecified carcinomas	Left - origin of primary	Positive histology	Blank(s)	Blank(s)	40	40	Blank(s)	Blank(s)	Blank(s)	Blank(s)	Blank(s)	Blank(s)	TX	N0	M1	Blank(s)	Blank(s)	Distant	Distant site(s)/node(s) involved	Blank(s)	0	None	Non-primary surgical procedure to distant site	No radiation and/or cancer-directed surgery	Not recommended	None	Blank(s)	Blank(s)	Blank(s)	Blank(s)	Blank(s)	Blank(s)	Blank(s)	Blank(s)	Blank(s)	Blank(s)	Blank(s)	Blank(s)
523	65	1937	2003	Female	Other (American Indian/AK Native, Asian/Pacific Islander)	C34.1-Upper lobe, lung	8013/3: Large cell neuroendocrine carcinoma	Poorly differentiated; Grade III	8.3 Carcinoma of trachea,bronchus, and lung	Unclassified	XI(f) Other and unspecified carcinomas	Left - origin of primary	Positive histology	Blank(s)	Blank(s)	40	40	Blank(s)	Blank(s)	Blank(s)	Blank(s)	Blank(s)	Blank(s)	TX	NX	M1	Blank(s)	Blank(s)	Distant	Distant site(s)/node(s) involved	Blank(s)	0	None	Non-primary surgical procedure to distant site	Radiation after surgery	Not recommended	Beam radiation	Blank(s)	Blank(s)	Blank(s)	Blank(s)	Blank(s)	Blank(s)	Blank(s)	Blank(s)	Blank(s)	Blank(s)	Blank(s)	Blank(s)
524	75	1927	2003	Male	Other (American Indian/AK Native, Asian/Pacific Islander)	C34.9-Lung, NOS	8013/3: Large cell neuroendocrine carcinoma	Unknown	8.3 Carcinoma of trachea,bronchus, and lung	Unclassified	XI(f) Other and unspecified carcinomas	Left - origin of primary	Positive histology	Blank(s)	Blank(s)	40	40	Blank(s)	Blank(s)	Blank(s)	Blank(s)	Blank(s)	Blank(s)	TX	N1	M1	Blank(s)	Blank(s)	Distant	Distant site(s)/node(s) involved	Blank(s)	0	None	None; diagnosed at autopsy	No radiation and/or cancer-directed surgery	Not recommended	None	Blank(s)	Blank(s)	Blank(s)	Blank(s)	Blank(s)	Blank(s)	Blank(s)	Blank(s)	Blank(s)	Blank(s)	Blank(s)	Blank(s)
525	57	1946	2003	Female	White	C34.1-Upper lobe, lung	8013/3: Large cell neuroendocrine carcinoma	Poorly differentiated; Grade III	8.3 Carcinoma of trachea,bronchus, and lung	Unclassified	XI(f) Other and unspecified carcinomas	Left - origin of primary	Positive histology	Blank(s)	Blank(s)	40	40	Blank(s)	Blank(s)	Blank(s)	Blank(s)	Blank(s)	Blank(s)	T2	NX	M1	Blank(s)	Blank(s)	Distant	Distant site(s)/node(s) involved	Blank(s)	0	None	None; diagnosed at autopsy	No radiation and/or cancer-directed surgery	Not recommended	Beam radiation	Blank(s)	Blank(s)	Blank(s)	Blank(s)	Blank(s)	Blank(s)	Blank(s)	Blank(s)	Blank(s)	Blank(s)	Blank(s)	Blank(s)
526	48	1955	2003	Male	Other (American Indian/AK Native, Asian/Pacific Islander)	C34.1-Upper lobe, lung	8013/3: Large cell neuroendocrine carcinoma	Unknown	8.3 Carcinoma of trachea,bronchus, and lung	Unclassified	XI(f) Other and unspecified carcinomas	Right - origin of primary	Positive histology	Blank(s)	Blank(s)	32	32	Blank(s)	Blank(s)	Blank(s)	Blank(s)	Blank(s)	Blank(s)	T4	N2	M0	Blank(s)	Blank(s)	Regional	Regional by both direct extension and lymph node involvement	Blank(s)	0	Biopsy or aspiration of regional lymph node, NOS	None; diagnosed at autopsy	Radiation after surgery	Not recommended	Beam radiation	Blank(s)	Blank(s)	Blank(s)	Blank(s)	Blank(s)	Blank(s)	Blank(s)	Blank(s)	Blank(s)	Blank(s)	Blank(s)	Blank(s)
527	67	1936	2003	Male	White	C34.1-Upper lobe, lung	8013/3: Large cell neuroendocrine carcinoma	Poorly differentiated; Grade III	8.3 Carcinoma of trachea,bronchus, and lung	Unclassified	XI(f) Other and unspecified carcinomas	Left - origin of primary	Positive histology	Blank(s)	Blank(s)	40	40	Blank(s)	Blank(s)	Blank(s)	Blank(s)	Blank(s)	Blank(s)	TX	N1	M1	Blank(s)	Blank(s)	Distant	Distant site(s)/node(s) involved	Blank(s)	33	4 or more regional lymph nodes removed	None; diagnosed at autopsy	Radiation after surgery	Surgery performed	Beam radiation	Blank(s)	Blank(s)	Blank(s)	Blank(s)	Blank(s)	Blank(s)	Blank(s)	Blank(s)	Blank(s)	Blank(s)	Blank(s)	Blank(s)
528	85	1917	2003	Male	Other (American Indian/AK Native, Asian/Pacific Islander)	C34.3-Lower lobe, lung	8013/3: Large cell neuroendocrine carcinoma	Unknown	8.3 Carcinoma of trachea,bronchus, and lung	Unclassified	XI(f) Other and unspecified carcinomas	Right - origin of primary	Positive histology	Blank(s)	Blank(s)	10	10	Blank(s)	Blank(s)	Blank(s)	Blank(s)	Blank(s)	Blank(s)	T1	N0	M0	Blank(s)	Blank(s)	Localized	Localized only	Blank(s)	21	None	None; diagnosed at autopsy	No radiation and/or cancer-directed surgery	Surgery performed	None	Blank(s)	Blank(s)	Blank(s)	Blank(s)	Blank(s)	Blank(s)	Blank(s)	Blank(s)	Blank(s)	Blank(s)	Blank(s)	Blank(s)
529	76	1926	2003	Female	Other (American Indian/AK Native, Asian/Pacific Islander)	C34.1-Upper lobe, lung	8013/3: Large cell neuroendocrine carcinoma	Moderately differentiated; Grade II	8.3 Carcinoma of trachea,bronchus, and lung	Unclassified	XI(f) Other and unspecified carcinomas	Left - origin of primary	Positive histology	Blank(s)	Blank(s)	32	32	Blank(s)	Blank(s)	Blank(s)	Blank(s)	Blank(s)	Blank(s)	T4	N0	M0	Blank(s)	Blank(s)	Regional	Regional by direct extension only	Blank(s)	30	4 or more regional lymph nodes removed	None; diagnosed at autopsy	No radiation and/or cancer-directed surgery	Surgery performed	None	Blank(s)	Blank(s)	Blank(s)	Blank(s)	Blank(s)	Blank(s)	Blank(s)	Blank(s)	Blank(s)	Blank(s)	Blank(s)	Blank(s)
530	71	1937	2009	Female	Other (American Indian/AK Native, Asian/Pacific Islander)	C34.3-Lower lobe, lung	8013/3: Large cell neuroendocrine carcinoma	Poorly differentiated; Grade III	8.3 Carcinoma of trachea,bronchus, and lung	Unclassified	XI(f) Other and unspecified carcinomas	Right - origin of primary	Positive histology	Blank(s)	IA	Blank(s)	Blank(s)	Blank(s)	Blank(s)	Blank(s)	T1	N0	M0	Blank(s)	Blank(s)	Blank(s)	L	L	Localized	Blank(s)	Blank(s)	33	4 or more regional lymph nodes removed	None; diagnosed at autopsy	No radiation and/or cancer-directed surgery	Surgery performed	None	Blank(s)	Blank(s)	Blank(s)	Blank(s)	Blank(s)	21	100	0	0	988	Blank(s)	Blank(s)
531	83	1921	2004	Female	Other (American Indian/AK Native, Asian/Pacific Islander)	C34.9-Lung, NOS	8013/3: Large cell neuroendocrine carcinoma	Unknown	8.3 Carcinoma of trachea,bronchus, and lung	Unclassified	XI(f) Other and unspecified carcinomas	Right - origin of primary	Positive histology	Blank(s)	IV	Blank(s)	Blank(s)	Blank(s)	Blank(s)	Blank(s)	T4	N3	M1	Blank(s)	Blank(s)	Blank(s)	D	D	Distant	Blank(s)	Blank(s)	0	1 to 3 regional lymph nodes removed	None; diagnosed at autopsy	No radiation and/or cancer-directed surgery	Recommended but not performed, unknown reason	None	Blank(s)	Blank(s)	Blank(s)	Blank(s)	Blank(s)	999	700	600	50	988	Blank(s)	Blank(s)
532	72	1931	2004	Male	Other (American Indian/AK Native, Asian/Pacific Islander)	C34.3-Lower lobe, lung	8013/3: Large cell neuroendocrine carcinoma	Poorly differentiated; Grade III	8.3 Carcinoma of trachea,bronchus, and lung	Unclassified	XI(f) Other and unspecified carcinomas	Left - origin of primary	Positive histology	Blank(s)	IIIA	Blank(s)	Blank(s)	Blank(s)	Blank(s)	Blank(s)	T2	N2	M0	Blank(s)	Blank(s)	Blank(s)	RN	RN	Regional	Blank(s)	Blank(s)	22	4 or more regional lymph nodes removed	None; diagnosed at autopsy	No radiation and/or cancer-directed surgery	Surgery performed	None	Blank(s)	Blank(s)	Blank(s)	Blank(s)	Blank(s)	45	100	200	0	988	Blank(s)	Blank(s)
533	55	1952	2008	Male	White	C34.3-Lower lobe, lung	8013/3: Large cell neuroendocrine carcinoma	Poorly differentiated; Grade III	8.3 Carcinoma of trachea,bronchus, and lung	Unclassified	XI(f) Other and unspecified carcinomas	Left - origin of primary	Positive histology	Blank(s)	UNK Stage	Blank(s)	Blank(s)	Blank(s)	Blank(s)	Blank(s)	TX	NX	MX	Blank(s)	Blank(s)	Blank(s)	U	U	Unknown/unstaged	Blank(s)	Blank(s)	99	Unknown or not applicable	Unknown; death certificate only	No radiation and/or cancer-directed surgery	Unknown; death certificate; or autopsy only (2003+)	Unknown	Blank(s)	Blank(s)	Blank(s)	Blank(s)	Blank(s)	999	999	999	99	988	Blank(s)	Blank(s)
534	77	1927	2004	Male	Other (American Indian/AK Native, Asian/Pacific Islander)	C34.1-Upper lobe, lung	8013/3: Large cell neuroendocrine carcinoma	Poorly differentiated; Grade III	8.3 Carcinoma of trachea,bronchus, and lung	Unclassified	XI(f) Other and unspecified carcinomas	Left - origin of primary	Positive histology	Blank(s)	IIIB	Blank(s)	Blank(s)	Blank(s)	Blank(s)	Blank(s)	T4	N0	M0	Blank(s)	Blank(s)	Blank(s)	L	RE	Regional	Blank(s)	Blank(s)	22	None	None; diagnosed at autopsy	No radiation and/or cancer-directed surgery	Surgery performed	None	Blank(s)	Blank(s)	Blank(s)	Blank(s)	Blank(s)	32	650	0	0	988	Blank(s)	Blank(s)
535	67	1937	2005	Male	Other (American Indian/AK Native, Asian/Pacific Islander)	C34.2-Middle lobe, lung	8013/3: Large cell neuroendocrine carcinoma	Unknown	8.3 Carcinoma of trachea,bronchus, and lung	Unclassified	XI(f) Other and unspecified carcinomas	Right - origin of primary	Positive histology	Blank(s)	IIB	Blank(s)	Blank(s)	Blank(s)	Blank(s)	Blank(s)	T3	N0	M0	Blank(s)	Blank(s)	Blank(s)	D	RE	Regional	Blank(s)	Blank(s)	56	4 or more regional lymph nodes removed	None; diagnosed at autopsy	No radiation and/or cancer-directed surgery	Surgery performed	None	Blank(s)	Blank(s)	Blank(s)	Blank(s)	Blank(s)	78	600	0	0	988	Blank(s)	Blank(s)
536	69	1936	2005	Male	White	C34.1-Upper lobe, lung	8013/3: Large cell neuroendocrine carcinoma	Unknown	8.3 Carcinoma of trachea,bronchus, and lung	Unclassified	XI(f) Other and unspecified carcinomas	Left - origin of primary	Positive histology	Blank(s)	IV	Blank(s)	Blank(s)	Blank(s)	Blank(s)	Blank(s)	T2	N2	M1	Blank(s)	Blank(s)	Blank(s)	D	D	Distant	Blank(s)	Blank(s)	0	None	Non-primary surgical procedure to distant site	Radiation after surgery	Not recommended	Radioactive implants	Blank(s)	Blank(s)	Blank(s)	Blank(s)	Blank(s)	32	300	200	40	988	Blank(s)	Blank(s)
537	78	1926	2005	Female	Other (American Indian/AK Native, Asian/Pacific Islander)	C34.1-Upper lobe, lung	8013/3: Large cell neuroendocrine carcinoma	Unknown	8.3 Carcinoma of trachea,bronchus, and lung	Unclassified	XI(f) Other and unspecified carcinomas	Left - origin of primary	Positive histology	Blank(s)	IV	Blank(s)	Blank(s)	Blank(s)	Blank(s)	Blank(s)	T3	N2	M1	Blank(s)	Blank(s)	Blank(s)	D	D	Distant	Blank(s)	Blank(s)	0	None	None; diagnosed at autopsy	No radiation and/or cancer-directed surgery	Recommended but not performed, unknown reason	None	Blank(s)	Blank(s)	Blank(s)	Blank(s)	Blank(s)	26	730	200	40	988	Blank(s)	Blank(s)
538	55	1949	2005	Male	White	C34.2-Middle lobe, lung	8013/3: Large cell neuroendocrine carcinoma	Poorly differentiated; Grade III	8.3 Carcinoma of trachea,bronchus, and lung	Unclassified	XI(f) Other and unspecified carcinomas	Right - origin of primary	Positive histology	Blank(s)	IB	Blank(s)	Blank(s)	Blank(s)	Blank(s)	Blank(s)	T2	N0	M0	Blank(s)	Blank(s)	Blank(s)	RE	RE	Regional	Blank(s)	Blank(s)	30	Biopsy or aspiration of regional lymph node, NOS	None; diagnosed at autopsy	No radiation and/or cancer-directed surgery	Surgery performed	None	Blank(s)	Blank(s)	Blank(s)	Blank(s)	Blank(s)	25	450	0	0	988	Blank(s)	Blank(s)
539	86	1919	2005	Female	Other (American Indian/AK Native, Asian/Pacific Islander)	C34.1-Upper lobe, lung	8013/3: Large cell neuroendocrine carcinoma	Poorly differentiated; Grade III	8.3 Carcinoma of trachea,bronchus, and lung	Unclassified	XI(f) Other and unspecified carcinomas	Left - origin of primary	Positive histology	Blank(s)	IV	Blank(s)	Blank(s)	Blank(s)	Blank(s)	Blank(s)	T3	N2	M1	Blank(s)	Blank(s)	Blank(s)	D	D	Distant	Blank(s)	Blank(s)	0	None	None; diagnosed at autopsy	No radiation and/or cancer-directed surgery	Recommended but not performed, patient refused	None	Blank(s)	Blank(s)	Blank(s)	Blank(s)	Blank(s)	999	500	200	40	988	Blank(s)	Blank(s)
540	66	1938	2005	Female	White	C34.1-Upper lobe, lung	8013/3: Large cell neuroendocrine carcinoma	Poorly differentiated; Grade III	8.3 Carcinoma of trachea,bronchus, and lung	Unclassified	XI(f) Other and unspecified carcinomas	Left - origin of primary	Positive histology	Blank(s)	IA	Blank(s)	Blank(s)	Blank(s)	Blank(s)	Blank(s)	T1	N0	M0	Blank(s)	Blank(s)	Blank(s)	L	L	Localized	Blank(s)	Blank(s)	33	4 or more regional lymph nodes removed	None; diagnosed at autopsy	No radiation and/or cancer-directed surgery	Surgery performed	None	Blank(s)	Blank(s)	Blank(s)	Blank(s)	Blank(s)	14	100	0	0	988	Blank(s)	Blank(s)
541	57	1948	2006	Male	Other (American Indian/AK Native, Asian/Pacific Islander)	C34.3-Lower lobe, lung	8013/3: Large cell neuroendocrine carcinoma	Undifferentiated; anaplastic; Grade IV	8.3 Carcinoma of trachea,bronchus, and lung	Unclassified	XI(f) Other and unspecified carcinomas	Right - origin of primary	Positive histology	Blank(s)	IB	Blank(s)	Blank(s)	Blank(s)	Blank(s)	Blank(s)	T2	N0	M0	Blank(s)	Blank(s)	Blank(s)	RE	RE	Regional	Blank(s)	Blank(s)	33	4 or more regional lymph nodes removed	None; diagnosed at autopsy	No radiation and/or cancer-directed surgery	Surgery performed	None	Blank(s)	Blank(s)	Blank(s)	Blank(s)	Blank(s)	16	450	0	0	988	Blank(s)	Blank(s)
542	66	1939	2006	Female	Other (American Indian/AK Native, Asian/Pacific Islander)	C34.3-Lower lobe, lung	8013/3: Large cell neuroendocrine carcinoma	Unknown	8.3 Carcinoma of trachea,bronchus, and lung	Unclassified	XI(f) Other and unspecified carcinomas	Left - origin of primary	Positive exfoliative cytology, no positive histology	Blank(s)	IV	Blank(s)	Blank(s)	Blank(s)	Blank(s)	Blank(s)	T2	NX	M1	Blank(s)	Blank(s)	Blank(s)	D	D	Distant	Blank(s)	Blank(s)	0	None	None; diagnosed at autopsy	No radiation and/or cancer-directed surgery	Not recommended	None	Blank(s)	Blank(s)	Blank(s)	Blank(s)	Blank(s)	97	400	999	40	988	Blank(s)	Blank(s)
543	79	1927	2006	Male	Other (American Indian/AK Native, Asian/Pacific Islander)	C34.2-Middle lobe, lung	8013/3: Large cell neuroendocrine carcinoma	Unknown	8.3 Carcinoma of trachea,bronchus, and lung	Unclassified	XI(f) Other and unspecified carcinomas	Right - origin of primary	Positive histology	Blank(s)	IV	Blank(s)	Blank(s)	Blank(s)	Blank(s)	Blank(s)	T1	N3	M1	Blank(s)	Blank(s)	Blank(s)	D	D	Distant	Blank(s)	Blank(s)	0	None	Non-primary surgical procedure to distant site	Radiation after surgery	Not recommended	Beam radiation	Blank(s)	Blank(s)	Blank(s)	Blank(s)	Blank(s)	15	300	600	50	988	Blank(s)	Blank(s)
544	60	1947	2007	Female	White	C34.3-Lower lobe, lung	8013/3: Large cell neuroendocrine carcinoma	Unknown	8.3 Carcinoma of trachea,bronchus, and lung	Unclassified	XI(f) Other and unspecified carcinomas	Right - origin of primary	Positive histology	Blank(s)	IV	Blank(s)	Blank(s)	Blank(s)	Blank(s)	Blank(s)	T4	N0	M1	Blank(s)	Blank(s)	Blank(s)	D	D	Distant	Blank(s)	Blank(s)	0	None	None; diagnosed at autopsy	No radiation and/or cancer-directed surgery	Not recommended	Beam radiation	Blank(s)	Blank(s)	Blank(s)	Blank(s)	Blank(s)	30	720	0	40	988	Blank(s)	Blank(s)
545	86	1921	2007	Female	Other (American Indian/AK Native, Asian/Pacific Islander)	C34.1-Upper lobe, lung	8013/3: Large cell neuroendocrine carcinoma	Poorly differentiated; Grade III	8.3 Carcinoma of trachea,bronchus, and lung	Unclassified	XI(f) Other and unspecified carcinomas	Left - origin of primary	Positive histology	Blank(s)	IB	Blank(s)	Blank(s)	Blank(s)	Blank(s)	Blank(s)	T2	N0	M0	Blank(s)	Blank(s)	Blank(s)	RE	RE	Regional	Blank(s)	Blank(s)	33	1 to 3 regional lymph nodes removed	None; diagnosed at autopsy	No radiation and/or cancer-directed surgery	Surgery performed	None	Blank(s)	Blank(s)	Blank(s)	Blank(s)	Blank(s)	45	450	0	0	988	Blank(s)	Blank(s)
546	61	1946	2007	Male	Other (American Indian/AK Native, Asian/Pacific Islander)	C34.1-Upper lobe, lung	8013/3: Large cell neuroendocrine carcinoma	Unknown	8.3 Carcinoma of trachea,bronchus, and lung	Unclassified	XI(f) Other and unspecified carcinomas	Right - origin of primary	Positive histology	Blank(s)	IV	Blank(s)	Blank(s)	Blank(s)	Blank(s)	Blank(s)	T1	N3	M1	Blank(s)	Blank(s)	Blank(s)	D	D	Distant	Blank(s)	Blank(s)	0	None	None; diagnosed at autopsy	No radiation and/or cancer-directed surgery	Not recommended	Beam radiation	Blank(s)	Blank(s)	Blank(s)	Blank(s)	Blank(s)	11	100	600	40	988	Blank(s)	Blank(s)
547	75	1932	2007	Male	Other (American Indian/AK Native, Asian/Pacific Islander)	C34.1-Upper lobe, lung	8013/3: Large cell neuroendocrine carcinoma	Unknown	8.3 Carcinoma of trachea,bronchus, and lung	Unclassified	XI(f) Other and unspecified carcinomas	Left - origin of primary	Positive histology	Blank(s)	IV	Blank(s)	Blank(s)	Blank(s)	Blank(s)	Blank(s)	T4	N3	M1	Blank(s)	Blank(s)	Blank(s)	D	D	Distant	Blank(s)	Blank(s)	0	None	None; diagnosed at autopsy	No radiation and/or cancer-directed surgery	Not recommended	Recommended, unknown if administered	Blank(s)	Blank(s)	Blank(s)	Blank(s)	Blank(s)	79	710	600	40	988	Blank(s)	Blank(s)
548	60	1947	2008	Male	White	C34.1-Upper lobe, lung	8013/3: Large cell neuroendocrine carcinoma	Unknown	8.3 Carcinoma of trachea,bronchus, and lung	Unclassified	XI(f) Other and unspecified carcinomas	Right - origin of primary	Positive histology	Blank(s)	IV	Blank(s)	Blank(s)	Blank(s)	Blank(s)	Blank(s)	T2	N2	M1	Blank(s)	Blank(s)	Blank(s)	D	D	Distant	Blank(s)	Blank(s)	0	Biopsy or aspiration of regional lymph node, NOS	None; diagnosed at autopsy	Radiation after surgery	Not recommended	Beam radiation	Blank(s)	Blank(s)	Blank(s)	Blank(s)	Blank(s)	999	450	200	40	988	Blank(s)	Blank(s)
549	69	1940	2009	Male	Other (American Indian/AK Native, Asian/Pacific Islander)	C34.3-Lower lobe, lung	8013/3: Large cell neuroendocrine carcinoma	Poorly differentiated; Grade III	8.3 Carcinoma of trachea,bronchus, and lung	Unclassified	XI(f) Other and unspecified carcinomas	Left - origin of primary	Positive histology	Blank(s)	IIB	Blank(s)	Blank(s)	Blank(s)	Blank(s)	Blank(s)	T2	N1	M0	Blank(s)	Blank(s)	Blank(s)	RN	RN	Regional	Blank(s)	Blank(s)	33	4 or more regional lymph nodes removed	None; diagnosed at autopsy	No radiation and/or cancer-directed surgery	Surgery performed	None	Blank(s)	Blank(s)	Blank(s)	Blank(s)	Blank(s)	75	200	100	0	988	Blank(s)	Blank(s)
550	72	1940	2012	Male	Other (American Indian/AK Native, Asian/Pacific Islander)	C34.1-Upper lobe, lung	8013/3: Large cell neuroendocrine carcinoma	Undifferentiated; anaplastic; Grade IV	8.3 Carcinoma of trachea,bronchus, and lung	Unclassified	XI(f) Other and unspecified carcinomas	Right - origin of primary	Positive histology	IA	IA	Blank(s)	Blank(s)	T1a	N0	M0	T1	N0	M0	Blank(s)	Blank(s)	Blank(s)	L	L	Localized	Blank(s)	Blank(s)	21	1 to 3 regional lymph nodes removed	None; diagnosed at autopsy	No radiation and/or cancer-directed surgery	Surgery performed	None	Blank(s)	Blank(s)	Blank(s)	Blank(s)	Blank(s)	13	100	0	0	0	0	Blank(s)
551	73	1936	2009	Female	Other (American Indian/AK Native, Asian/Pacific Islander)	C34.1-Upper lobe, lung	8013/3: Large cell neuroendocrine carcinoma	Poorly differentiated; Grade III	8.3 Carcinoma of trachea,bronchus, and lung	Unclassified	XI(f) Other and unspecified carcinomas	Left - origin of primary	Positive histology	Blank(s)	IB	Blank(s)	Blank(s)	Blank(s)	Blank(s)	Blank(s)	T2	N0	M0	Blank(s)	Blank(s)	Blank(s)	RE	RE	Regional	Blank(s)	Blank(s)	20	1 to 3 regional lymph nodes removed	None; diagnosed at autopsy	No radiation and/or cancer-directed surgery	Surgery performed	None	Blank(s)	Blank(s)	Blank(s)	Blank(s)	Blank(s)	28	450	0	0	988	Blank(s)	Blank(s)
552	84	1926	2010	Male	White	C34.1-Upper lobe, lung	8013/3: Large cell neuroendocrine carcinoma	Poorly differentiated; Grade III	8.3 Carcinoma of trachea,bronchus, and lung	Unclassified	XI(f) Other and unspecified carcinomas	Right - origin of primary	Positive histology	IA	IA	Blank(s)	Blank(s)	T1b	N0	M0	T1	N0	M0	Blank(s)	Blank(s)	Blank(s)	L	L	Localized	Blank(s)	Blank(s)	22	None	None; diagnosed at autopsy	No radiation and/or cancer-directed surgery	Surgery performed	None	Blank(s)	Blank(s)	Blank(s)	Blank(s)	Blank(s)	23	100	0	0	0	0	Blank(s)
553	71	1938	2010	Male	Other (American Indian/AK Native, Asian/Pacific Islander)	C34.1-Upper lobe, lung	8013/3: Large cell neuroendocrine carcinoma	Unknown	8.3 Carcinoma of trachea,bronchus, and lung	Unclassified	XI(f) Other and unspecified carcinomas	Left - origin of primary	Positive histology	IV	IV	Blank(s)	Blank(s)	T2NOS	N2	M1b	T4	N2	M1	Blank(s)	Blank(s)	Blank(s)	D	D	Distant	Blank(s)	Blank(s)	0	Biopsy or aspiration of regional lymph node, NOS	None; diagnosed at autopsy	Radiation after surgery	Not recommended	Beam radiation	Blank(s)	Blank(s)	Blank(s)	Blank(s)	Blank(s)	999	400	200	42	0	0	Blank(s)
554	72	1938	2010	Male	Other (American Indian/AK Native, Asian/Pacific Islander)	C34.9-Lung, NOS	8013/3: Large cell neuroendocrine carcinoma	Unknown	8.3 Carcinoma of trachea,bronchus, and lung	Unclassified	XI(f) Other and unspecified carcinomas	Left - origin of primary	Positive exfoliative cytology, no positive histology	IV	IV	Blank(s)	Blank(s)	T3	N2	M1b	T4	N2	M1	Blank(s)	Blank(s)	Blank(s)	D	D	Distant	Blank(s)	Blank(s)	0	None	None; diagnosed at autopsy	No radiation and/or cancer-directed surgery	Not recommended	None	Blank(s)	Blank(s)	Blank(s)	Blank(s)	Blank(s)	62	600	200	42	0	998	Blank(s)
555	62	1948	2010	Female	Other (American Indian/AK Native, Asian/Pacific Islander)	C34.1-Upper lobe, lung	8013/3: Large cell neuroendocrine carcinoma	Unknown	8.3 Carcinoma of trachea,bronchus, and lung	Unclassified	XI(f) Other and unspecified carcinomas	Right - origin of primary	Positive histology	IV	IV	Blank(s)	Blank(s)	T3	N2	M1b	T4	N2	M1	Blank(s)	Blank(s)	Blank(s)	D	D	Distant	Blank(s)	Blank(s)	0	None	None; diagnosed at autopsy	No radiation and/or cancer-directed surgery	Not recommended	None	Blank(s)	Blank(s)	Blank(s)	Blank(s)	Blank(s)	120	600	200	40	10	998	Blank(s)
556	91	1919	2010	Male	Other (American Indian/AK Native, Asian/Pacific Islander)	C34.9-Lung, NOS	8013/3: Large cell neuroendocrine carcinoma	Unknown	8.3 Carcinoma of trachea,bronchus, and lung	Unclassified	XI(f) Other and unspecified carcinomas	Paired site, but no information concerning laterality	Positive histology	UNK Stage	UNK Stage	Blank(s)	Blank(s)	TX	NX	M0	TX	NX	MX	Blank(s)	Blank(s)	Blank(s)	U	U	Unknown/unstaged	Blank(s)	Blank(s)	99	Unknown or not applicable	Unknown; death certificate only	No radiation and/or cancer-directed surgery	Unknown; death certificate; or autopsy only (2003+)	Unknown	Blank(s)	Blank(s)	Blank(s)	Blank(s)	Blank(s)	999	999	999	99	999	999	Blank(s)
557	74	1936	2010	Male	Other (American Indian/AK Native, Asian/Pacific Islander)	C34.1-Upper lobe, lung	8013/3: Large cell neuroendocrine carcinoma	Undifferentiated; anaplastic; Grade IV	8.3 Carcinoma of trachea,bronchus, and lung	Unclassified	XI(f) Other and unspecified carcinomas	Right - origin of primary	Positive histology	IA	IA	Blank(s)	Blank(s)	T1b	N0	M0	T1	N0	M0	Blank(s)	Blank(s)	Blank(s)	L	L	Localized	Blank(s)	Blank(s)	33	4 or more regional lymph nodes removed	None; diagnosed at autopsy	No radiation and/or cancer-directed surgery	Surgery performed	None	Blank(s)	Blank(s)	Blank(s)	Blank(s)	Blank(s)	28	100	0	0	0	0	Blank(s)
558	71	1939	2011	Male	White	C34.1-Upper lobe, lung	8013/3: Large cell neuroendocrine carcinoma	Undifferentiated; anaplastic; Grade IV	8.3 Carcinoma of trachea,bronchus, and lung	Unclassified	XI(f) Other and unspecified carcinomas	Right - origin of primary	Positive histology	IIB	IB	Blank(s)	Blank(s)	T3	N0	M0	T2	N0	M0	Blank(s)	Blank(s)	Blank(s)	RE	RE	Regional	Blank(s)	Blank(s)	0	None	None; diagnosed at autopsy	No radiation and/or cancer-directed surgery	Not recommended	Beam radiation	Blank(s)	Blank(s)	Blank(s)	Blank(s)	Blank(s)	86	410	0	0	0	998	Blank(s)
559	79	1932	2011	Female	White	C34.1-Upper lobe, lung	8013/3: Large cell neuroendocrine carcinoma	Poorly differentiated; Grade III	8.3 Carcinoma of trachea,bronchus, and lung	Unclassified	XI(f) Other and unspecified carcinomas	Right - origin of primary	Positive histology	IA	IA	Blank(s)	Blank(s)	T1b	N0	M0	T1	N0	M0	Blank(s)	Blank(s)	Blank(s)	L	L	Localized	Blank(s)	Blank(s)	33	4 or more regional lymph nodes removed	None; diagnosed at autopsy	No radiation and/or cancer-directed surgery	Surgery performed	None	Blank(s)	Blank(s)	Blank(s)	Blank(s)	Blank(s)	26	100	0	0	0	998	Blank(s)
560	71	1940	2012	Male	Other (American Indian/AK Native, Asian/Pacific Islander)	C34.1-Upper lobe, lung	8013/3: Large cell neuroendocrine carcinoma	Unknown	8.3 Carcinoma of trachea,bronchus, and lung	Unclassified	XI(f) Other and unspecified carcinomas	Left - origin of primary	Positive histology	IV	IV	Blank(s)	Blank(s)	T1a	N2	M1b	T1	N2	M1	Blank(s)	Blank(s)	Blank(s)	D	D	Distant	Blank(s)	Blank(s)	0	None	None; diagnosed at autopsy	No radiation and/or cancer-directed surgery	Not recommended	Beam radiation	Blank(s)	Blank(s)	Blank(s)	Blank(s)	Blank(s)	14	100	200	40	0	998	Blank(s)
561	72	1938	2011	Female	Other (American Indian/AK Native, Asian/Pacific Islander)	C34.9-Lung, NOS	8013/3: Large cell neuroendocrine carcinoma	Poorly differentiated; Grade III	8.3 Carcinoma of trachea,bronchus, and lung	Unclassified	XI(f) Other and unspecified carcinomas	Paired site, but no information concerning laterality	Positive histology	IIIB	IIIB	Blank(s)	Blank(s)	T4	N2	M0	T4	N2	M0	Blank(s)	Blank(s)	Blank(s)	RE+RN	RE+RN	Regional	Blank(s)	Blank(s)	0	Unknown or not applicable	None; diagnosed at autopsy	No radiation and/or cancer-directed surgery	Not recommended	Beam radiation	Blank(s)	Blank(s)	Blank(s)	Blank(s)	Blank(s)	999	700	200	0	999	998	Blank(s)
562	62	1948	2011	Female	Other (American Indian/AK Native, Asian/Pacific Islander)	C34.1-Upper lobe, lung	8013/3: Large cell neuroendocrine carcinoma	Undifferentiated; anaplastic; Grade IV	8.3 Carcinoma of trachea,bronchus, and lung	Unclassified	XI(f) Other and unspecified carcinomas	Left - origin of primary	Positive histology	IV	IV	Blank(s)	Blank(s)	T1a	N2	M1b	T1	N2	M1	Blank(s)	Blank(s)	Blank(s)	D	D	Distant	Blank(s)	Blank(s)	21	1 to 3 regional lymph nodes removed	None; diagnosed at autopsy	Radiation after surgery	Surgery performed	Beam radiation	Blank(s)	Blank(s)	Blank(s)	Blank(s)	Blank(s)	7	110	200	40	0	0	Blank(s)
563	73	1937	2011	Female	Other (American Indian/AK Native, Asian/Pacific Islander)	C34.1-Upper lobe, lung	8013/3: Large cell neuroendocrine carcinoma	Unknown	8.3 Carcinoma of trachea,bronchus, and lung	Unclassified	XI(f) Other and unspecified carcinomas	Right - origin of primary	Positive histology	IV	IV	Blank(s)	Blank(s)	TX	N2	M1b	TX	N2	M1	Blank(s)	Blank(s)	Blank(s)	D	D	Distant	Blank(s)	Blank(s)	0	None	None; diagnosed at autopsy	No radiation and/or cancer-directed surgery	Not recommended	Unknown	Blank(s)	Blank(s)	Blank(s)	Blank(s)	Blank(s)	999	999	200	40	999	999	Blank(s)
564	65	1947	2012	Female	Other (American Indian/AK Native, Asian/Pacific Islander)	C34.1-Upper lobe, lung	8013/3: Large cell neuroendocrine carcinoma	Unknown	8.3 Carcinoma of trachea,bronchus, and lung	Unclassified	XI(f) Other and unspecified carcinomas	Left - origin of primary	Positive histology	IV	IV	Blank(s)	Blank(s)	T4	N2	M1b	T4	N2	M1	Blank(s)	Blank(s)	Blank(s)	D	D	Distant	Blank(s)	Blank(s)	0	None	Non-primary surgical procedure to distant site	Radiation after surgery	Not recommended	Beam radiation	Blank(s)	Blank(s)	Blank(s)	Blank(s)	Blank(s)	63	700	200	40	0	998	Blank(s)
565	70	1942	2012	Male	Other (American Indian/AK Native, Asian/Pacific Islander)	C34.3-Lower lobe, lung	8013/3: Large cell neuroendocrine carcinoma	Poorly differentiated; Grade III	8.3 Carcinoma of trachea,bronchus, and lung	Unclassified	XI(f) Other and unspecified carcinomas	Left - origin of primary	Positive histology	IV	IV	Blank(s)	Blank(s)	T3	N3	M1b	T4	N3	M1	Blank(s)	Blank(s)	Blank(s)	D	D	Distant	Blank(s)	Blank(s)	0	None	None; diagnosed at autopsy	No radiation and/or cancer-directed surgery	Not recommended	None	Blank(s)	Blank(s)	Blank(s)	Blank(s)	Blank(s)	70	570	600	40	10	998	Blank(s)
566	74	1938	2012	Male	Other (American Indian/AK Native, Asian/Pacific Islander)	C34.1-Upper lobe, lung	8013/3: Large cell neuroendocrine carcinoma	Poorly differentiated; Grade III	8.3 Carcinoma of trachea,bronchus, and lung	Unclassified	XI(f) Other and unspecified carcinomas	Left - origin of primary	Positive histology	IIA	IIA	Blank(s)	Blank(s)	T1a	N1	M0	T1	N1	M0	Blank(s)	Blank(s)	Blank(s)	RN	RN	Regional	Blank(s)	Blank(s)	33	4 or more regional lymph nodes removed	None; diagnosed at autopsy	No radiation and/or cancer-directed surgery	Surgery performed	Unknown	Blank(s)	Blank(s)	Blank(s)	Blank(s)	Blank(s)	13	100	100	0	0	0	Blank(s)
567	69	1943	2013	Male	Other (American Indian/AK Native, Asian/Pacific Islander)	C34.1-Upper lobe, lung	8013/3: Large cell neuroendocrine carcinoma	Unknown	8.3 Carcinoma of trachea,bronchus, and lung	Unclassified	XI(f) Other and unspecified carcinomas	Left - origin of primary	Positive exfoliative cytology, no positive histology	IV	IV	Blank(s)	Blank(s)	T4	N2	M1b	T4	N2	M1	Blank(s)	Blank(s)	Blank(s)	D	D	Distant	Blank(s)	Blank(s)	0	Biopsy or aspiration of regional lymph node, NOS	None; diagnosed at autopsy	No radiation and/or cancer-directed surgery	Not recommended	None	Blank(s)	Blank(s)	Blank(s)	Blank(s)	Blank(s)	126	700	200	40	0	998	Blank(s)
568	61	1951	2013	Male	Other (American Indian/AK Native, Asian/Pacific Islander)	C34.1-Upper lobe, lung	8013/3: Large cell neuroendocrine carcinoma	Poorly differentiated; Grade III	8.3 Carcinoma of trachea,bronchus, and lung	Unclassified	XI(f) Other and unspecified carcinomas	Right - origin of primary	Positive histology	IIIA	UNK Stage	Blank(s)	Blank(s)	T4	N0	M0	T4	N0	MX	Blank(s)	Blank(s)	Blank(s)	RE	RE	Regional	Blank(s)	Blank(s)	0	None	None; diagnosed at autopsy	No radiation and/or cancer-directed surgery	Not recommended, contraindicated due to other cond; autopsy only (1973-2002)	Beam radiation	Blank(s)	Blank(s)	Blank(s)	Blank(s)	Blank(s)	174	700	0	99	0	998	Blank(s)
569	55	1957	2012	Male	Other (American Indian/AK Native, Asian/Pacific Islander)	C34.9-Lung, NOS	8013/3: Large cell neuroendocrine carcinoma	Unknown	8.3 Carcinoma of trachea,bronchus, and lung	Unclassified	XI(f) Other and unspecified carcinomas	Right - origin of primary	Positive histology	IV	IV	Blank(s)	Blank(s)	T4	N2	M1b	T4	N2	M1	Blank(s)	Blank(s)	Blank(s)	D	D	Distant	Blank(s)	Blank(s)	0	None	Non-primary surgical procedure to distant site	Radiation after surgery	Not recommended	Beam radiation	Blank(s)	Blank(s)	Blank(s)	Blank(s)	Blank(s)	999	300	200	40	30	998	Blank(s)
570	75	1938	2013	Female	White	C34.9-Lung, NOS	8013/3: Large cell neuroendocrine carcinoma	Unknown	8.3 Carcinoma of trachea,bronchus, and lung	Unclassified	XI(f) Other and unspecified carcinomas	Paired site, but no information concerning laterality	Positive histology	III	IIIA	Blank(s)	Blank(s)	TX	N2	M0	TX	N2	M0	Blank(s)	Blank(s)	Blank(s)	RN	RN	Regional	Blank(s)	Blank(s)	0	Biopsy or aspiration of regional lymph node, NOS	None; diagnosed at autopsy	Radiation after surgery	Not recommended	Beam radiation	Blank(s)	Blank(s)	Blank(s)	Blank(s)	Blank(s)	999	999	200	0	0	998	Blank(s)
571	63	1949	2013	Male	White	C34.1-Upper lobe, lung	8013/3: Large cell neuroendocrine carcinoma	Unknown	8.3 Carcinoma of trachea,bronchus, and lung	Unclassified	XI(f) Other and unspecified carcinomas	Left - origin of primary	Positive histology	IIIB	IIIB	Blank(s)	Blank(s)	T2b	N3	M0	T2	N3	M0	Blank(s)	Blank(s)	Blank(s)	D	D	Distant	Blank(s)	Blank(s)	0	None	None; diagnosed at autopsy	No radiation and/or cancer-directed surgery	Not recommended	Beam radiation	Blank(s)	Blank(s)	Blank(s)	Blank(s)	Blank(s)	59	100	600	0	0	998	Blank(s)
572	70	1943	2013	Male	Other (American Indian/AK Native, Asian/Pacific Islander)	C34.1-Upper lobe, lung	8013/3: Large cell neuroendocrine carcinoma	Unknown	8.3 Carcinoma of trachea,bronchus, and lung	Unclassified	XI(f) Other and unspecified carcinomas	Right - origin of primary	Positive histology	IV	IV	Blank(s)	Blank(s)	T1b	NX	M1b	T1	NX	M1	Blank(s)	Blank(s)	Blank(s)	D	D	Distant	Blank(s)	Blank(s)	0	None	None; diagnosed at autopsy	No radiation and/or cancer-directed surgery	Not recommended	Beam radiation	Blank(s)	Blank(s)	Blank(s)	Blank(s)	Blank(s)	23	100	999	40	0	998	Blank(s)
573	54	1959	2013	Male	Other (American Indian/AK Native, Asian/Pacific Islander)	C34.1-Upper lobe, lung	8013/3: Large cell neuroendocrine carcinoma	Poorly differentiated; Grade III	8.3 Carcinoma of trachea,bronchus, and lung	Unclassified	XI(f) Other and unspecified carcinomas	Left - origin of primary	Positive histology	IIB	IIB	Blank(s)	Blank(s)	T3	N0	M0	T3	N0	M0	Blank(s)	Blank(s)	Blank(s)	RE	RE	Regional	Blank(s)	Blank(s)	30	None	None; diagnosed at autopsy	Radiation after surgery	Surgery performed	Beam radiation	Blank(s)	Blank(s)	Blank(s)	Blank(s)	Blank(s)	999	570	0	0	999	999	Blank(s)
574	70	1943	2013	Male	White	C34.9-Lung, NOS	8013/3: Large cell neuroendocrine carcinoma	Poorly differentiated; Grade III	8.3 Carcinoma of trachea,bronchus, and lung	Unclassified	XI(f) Other and unspecified carcinomas	Paired site, but no information concerning laterality	Positive histology	UNK Stage	UNK Stage	Blank(s)	Blank(s)	TX	NX	M0	TX	NX	MX	Blank(s)	Blank(s)	Blank(s)	U	U	Unknown/unstaged	Blank(s)	Blank(s)	99	Unknown or not applicable	Unknown; death certificate only	No radiation and/or cancer-directed surgery	Unknown; death certificate; or autopsy only (2003+)	Unknown	Blank(s)	Blank(s)	Blank(s)	Blank(s)	Blank(s)	999	999	999	99	999	999	Blank(s)
575	67	1945	2013	Male	Other (American Indian/AK Native, Asian/Pacific Islander)	C34.9-Lung, NOS	8013/3: Large cell neuroendocrine carcinoma	Unknown	8.3 Carcinoma of trachea,bronchus, and lung	Unclassified	XI(f) Other and unspecified carcinomas	Left - origin of primary	Positive histology	IV	IV	Blank(s)	Blank(s)	T3	N2	M1b	T4	N2	M1	Blank(s)	Blank(s)	Blank(s)	D	D	Distant	Blank(s)	Blank(s)	0	None	None; diagnosed at autopsy	No radiation and/or cancer-directed surgery	Not recommended	None	Blank(s)	Blank(s)	Blank(s)	Blank(s)	Blank(s)	999	600	200	52	0	998	Blank(s)
576	60	1953	2013	Female	Other (American Indian/AK Native, Asian/Pacific Islander)	C34.1-Upper lobe, lung	8013/3: Large cell neuroendocrine carcinoma	Poorly differentiated; Grade III	8.3 Carcinoma of trachea,bronchus, and lung	Unclassified	XI(f) Other and unspecified carcinomas	Right - origin of primary	Positive histology	IIA	IB	Blank(s)	Blank(s)	T2b	N0	M0	T2	N0	M0	Blank(s)	Blank(s)	Blank(s)	L	L	Localized	Blank(s)	Blank(s)	33	4 or more regional lymph nodes removed	None; diagnosed at autopsy	No radiation and/or cancer-directed surgery	Surgery performed	None	Blank(s)	Blank(s)	Blank(s)	Blank(s)	Blank(s)	62	200	0	0	0	0	Blank(s)
577	76	1936	2013	Male	White	C34.9-Lung, NOS	8013/3: Large cell neuroendocrine carcinoma	Unknown	8.3 Carcinoma of trachea,bronchus, and lung	Unclassified	XI(f) Other and unspecified carcinomas	Paired site, but no information concerning laterality	Unknown	UNK Stage	UNK Stage	Blank(s)	Blank(s)	TX	NX	M0	TX	NX	MX	Blank(s)	Blank(s)	Blank(s)	U	U	Unknown/unstaged	Blank(s)	Blank(s)	0	None	None; diagnosed at autopsy	No radiation and/or cancer-directed surgery	Recommended but not performed, unknown reason	None	Blank(s)	Blank(s)	Blank(s)	Blank(s)	Blank(s)	999	999	999	99	999	999	Blank(s)
578	76	1934	2011	Female	White	C34.3-Lower lobe, lung	8013/3: Large cell neuroendocrine carcinoma	Poorly differentiated; Grade III	8.3 Carcinoma of trachea,bronchus, and lung	Unclassified	XI(f) Other and unspecified carcinomas	Left - origin of primary	Positive histology	IIIA	IIIB	Blank(s)	Blank(s)	T3	N2	M0	T4	N2	M0	Blank(s)	Blank(s)	Blank(s)	RN	RE+RN	Regional	Blank(s)	Blank(s)	0	None	None; diagnosed at autopsy	No radiation and/or cancer-directed surgery	Not recommended	Recommended, unknown if administered	Blank(s)	Blank(s)	Blank(s)	Blank(s)	Blank(s)	21	100	200	0	40	998	Blank(s)
579	70	1940	2011	Female	White	C34.3-Lower lobe, lung	8013/3: Large cell neuroendocrine carcinoma	Poorly differentiated; Grade III	8.3 Carcinoma of trachea,bronchus, and lung	Unclassified	XI(f) Other and unspecified carcinomas	Left - origin of primary	Positive histology	IIA	IIB	Blank(s)	Blank(s)	T2a	N1	M0	T2	N1	M0	Blank(s)	Blank(s)	Blank(s)	RN	RN	Regional	Blank(s)	Blank(s)	33	4 or more regional lymph nodes removed	None; diagnosed at autopsy	No radiation and/or cancer-directed surgery	Surgery performed	None	Blank(s)	Blank(s)	Blank(s)	Blank(s)	Blank(s)	45	100	100	0	0	0	Blank(s)
580	79	1921	2001	Female	White	C34.9-Lung, NOS	8013/3: Large cell neuroendocrine carcinoma	Unknown	8.3 Carcinoma of trachea,bronchus, and lung	Unclassified	XI(f) Other and unspecified carcinomas	Bilateral, single primary	Positive histology	Blank(s)	Blank(s)	40	40	Blank(s)	Blank(s)	Blank(s)	Blank(s)	Blank(s)	Blank(s)	TX	NX	M1	Blank(s)	Blank(s)	Distant	Distant site(s)/node(s) involved	Blank(s)	0	Blank(s)	Blank(s)	No radiation and/or cancer-directed surgery	Not recommended	None	0	0	0	Blank(s)	Blank(s)	Blank(s)	Blank(s)	Blank(s)	Blank(s)	Blank(s)	Blank(s)	Blank(s)
581	54	1956	2011	Male	White	C34.1-Upper lobe, lung	8013/3: Large cell neuroendocrine carcinoma	Unknown	8.3 Carcinoma of trachea,bronchus, and lung	Unclassified	XI(f) Other and unspecified carcinomas	Right - origin of primary	Positive histology	IV	IV	Blank(s)	Blank(s)	TX	NX	M1b	TX	NX	M1	Blank(s)	Blank(s)	Blank(s)	D	D	Distant	Blank(s)	Blank(s)	0	None	None; diagnosed at autopsy	No radiation and/or cancer-directed surgery	Not recommended	None	Blank(s)	Blank(s)	Blank(s)	Blank(s)	Blank(s)	999	999	999	40	0	998	Blank(s)
582	78	1933	2011	Female	White	C34.0-Main bronchus	8013/3: Large cell neuroendocrine carcinoma	Unknown	8.3 Carcinoma of trachea,bronchus, and lung	Unclassified	XI(f) Other and unspecified carcinomas	Right - origin of primary	Positive histology	IV	IV	Blank(s)	Blank(s)	T1b	N0	M1b	T4	N0	M1	Blank(s)	Blank(s)	Blank(s)	D	D	Distant	Blank(s)	Blank(s)	0	None	None; diagnosed at autopsy	No radiation and/or cancer-directed surgery	Not recommended	Beam radiation	Blank(s)	Blank(s)	Blank(s)	Blank(s)	Blank(s)	25	230	0	43	0	998	Blank(s)
583	69	1938	2007	Male	White	C34.3-Lower lobe, lung	8013/3: Large cell neuroendocrine carcinoma	Undifferentiated; anaplastic; Grade IV	8.3 Carcinoma of trachea,bronchus, and lung	Unclassified	XI(f) Other and unspecified carcinomas	Right - origin of primary	Positive histology	Blank(s)	IV	Blank(s)	Blank(s)	Blank(s)	Blank(s)	Blank(s)	T2	N2	M1	Blank(s)	Blank(s)	Blank(s)	D	D	Distant	Blank(s)	Blank(s)	0	None	None; diagnosed at autopsy	No radiation and/or cancer-directed surgery	Not recommended	None	Blank(s)	Blank(s)	Blank(s)	Blank(s)	Blank(s)	82	300	200	40	988	Blank(s)	Blank(s)
584	68	1943	2011	Female	White	C34.3-Lower lobe, lung	8013/3: Large cell neuroendocrine carcinoma	Poorly differentiated; Grade III	8.3 Carcinoma of trachea,bronchus, and lung	Unclassified	XI(f) Other and unspecified carcinomas	Right - origin of primary	Positive histology	IA	IA	Blank(s)	Blank(s)	T1a	N0	M0	T1	N0	M0	Blank(s)	Blank(s)	Blank(s)	L	L	Localized	Blank(s)	Blank(s)	21	None	None; diagnosed at autopsy	No radiation and/or cancer-directed surgery	Surgery performed	None	Blank(s)	Blank(s)	Blank(s)	Blank(s)	Blank(s)	10	100	0	0	0	0	Blank(s)
585	78	1924	2002	Male	White	C34.3-Lower lobe, lung	8013/3: Large cell neuroendocrine carcinoma	Unknown	8.3 Carcinoma of trachea,bronchus, and lung	Unclassified	XI(f) Other and unspecified carcinomas	Left - origin of primary	Positive histology	Blank(s)	Blank(s)	40	40	Blank(s)	Blank(s)	Blank(s)	Blank(s)	Blank(s)	Blank(s)	TX	NX	M1	Blank(s)	Blank(s)	Distant	Distant site(s)/node(s) involved	Blank(s)	0	Blank(s)	Blank(s)	No radiation and/or cancer-directed surgery	Not recommended	Recommended, unknown if administered	0	0	0	Blank(s)	Blank(s)	Blank(s)	Blank(s)	Blank(s)	Blank(s)	Blank(s)	Blank(s)	Blank(s)
586	67	1935	2002	Male	White	C34.3-Lower lobe, lung	8013/3: Large cell neuroendocrine carcinoma	Poorly differentiated; Grade III	8.3 Carcinoma of trachea,bronchus, and lung	Unclassified	XI(f) Other and unspecified carcinomas	Left - origin of primary	Positive histology	Blank(s)	Blank(s)	40	40	Blank(s)	Blank(s)	Blank(s)	Blank(s)	Blank(s)	Blank(s)	TX	N2	M1	Blank(s)	Blank(s)	Distant	Distant site(s)/node(s) involved	Blank(s)	0	Blank(s)	Blank(s)	No radiation and/or cancer-directed surgery	Not recommended	None	0	0	0	Blank(s)	Blank(s)	Blank(s)	Blank(s)	Blank(s)	Blank(s)	Blank(s)	Blank(s)	Blank(s)
587	81	1930	2011	Female	White	C34.3-Lower lobe, lung	8013/3: Large cell neuroendocrine carcinoma	Unknown	8.3 Carcinoma of trachea,bronchus, and lung	Unclassified	XI(f) Other and unspecified carcinomas	Right - origin of primary	Positive histology	IV	IV	Blank(s)	Blank(s)	T1a	N2	M1b	T1	N2	M1	Blank(s)	Blank(s)	Blank(s)	D	D	Distant	Blank(s)	Blank(s)	0	None	Non-primary surgical procedure to distant site	Radiation after surgery	Not recommended	Beam radiation	Blank(s)	Blank(s)	Blank(s)	Blank(s)	Blank(s)	10	300	200	40	0	998	Blank(s)
588	68	1933	2002	Male	White	C34.9-Lung, NOS	8013/3: Large cell neuroendocrine carcinoma	Unknown	8.3 Carcinoma of trachea,bronchus, and lung	Unclassified	XI(f) Other and unspecified carcinomas	Right - origin of primary	Positive exfoliative cytology, no positive histology	Blank(s)	Blank(s)	40	40	Blank(s)	Blank(s)	Blank(s)	Blank(s)	Blank(s)	Blank(s)	TX	N2	M1	Blank(s)	Blank(s)	Distant	Distant site(s)/node(s) involved	Blank(s)	0	Blank(s)	Blank(s)	No radiation and/or cancer-directed surgery	Not recommended	None	0	0	0	Blank(s)	Blank(s)	Blank(s)	Blank(s)	Blank(s)	Blank(s)	Blank(s)	Blank(s)	Blank(s)
589	70	1941	2012	Male	White	C34.1-Upper lobe, lung	8013/3: Large cell neuroendocrine carcinoma	Undifferentiated; anaplastic; Grade IV	8.3 Carcinoma of trachea,bronchus, and lung	Unclassified	XI(f) Other and unspecified carcinomas	Right - origin of primary	Positive histology	IA	IA	Blank(s)	Blank(s)	T1a	N0	M0	T1	N0	M0	Blank(s)	Blank(s)	Blank(s)	L	L	Localized	Blank(s)	Blank(s)	30	4 or more regional lymph nodes removed	None; diagnosed at autopsy	No radiation and/or cancer-directed surgery	Surgery performed	None	Blank(s)	Blank(s)	Blank(s)	Blank(s)	Blank(s)	16	100	0	0	0	0	Blank(s)
590	76	1927	2003	Male	White	C34.2-Middle lobe, lung	8013/3: Large cell neuroendocrine carcinoma	Unknown	8.3 Carcinoma of trachea,bronchus, and lung	Unclassified	XI(f) Other and unspecified carcinomas	Right - origin of primary	Positive histology	Blank(s)	Blank(s)	31	31	Blank(s)	Blank(s)	Blank(s)	Blank(s)	Blank(s)	Blank(s)	T1	N2	M0	Blank(s)	Blank(s)	Regional	Regional lymph nodes involved only	Blank(s)	33	1 to 3 regional lymph nodes removed	None; diagnosed at autopsy	No radiation and/or cancer-directed surgery	Surgery performed	None	Blank(s)	Blank(s)	Blank(s)	Blank(s)	Blank(s)	Blank(s)	Blank(s)	Blank(s)	Blank(s)	Blank(s)	Blank(s)	Blank(s)
591	85	1921	2006	Female	White	C34.0-Main bronchus	8013/3: Large cell neuroendocrine carcinoma	Unknown	8.3 Carcinoma of trachea,bronchus, and lung	Unclassified	XI(f) Other and unspecified carcinomas	Left - origin of primary	Positive histology	Blank(s)	IIIB	Blank(s)	Blank(s)	Blank(s)	Blank(s)	Blank(s)	T4	N0	M0	Blank(s)	Blank(s)	Blank(s)	D	D	Distant	Blank(s)	Blank(s)	0	None	None; diagnosed at autopsy	No radiation and/or cancer-directed surgery	Not recommended	Beam radiation	Blank(s)	Blank(s)	Blank(s)	Blank(s)	Blank(s)	999	720	0	0	988	Blank(s)	Blank(s)
592	76	1931	2008	Male	White	C34.1-Upper lobe, lung	8013/3: Large cell neuroendocrine carcinoma	Poorly differentiated; Grade III	8.3 Carcinoma of trachea,bronchus, and lung	Unclassified	XI(f) Other and unspecified carcinomas	Left - origin of primary	Positive histology	Blank(s)	IA	Blank(s)	Blank(s)	Blank(s)	Blank(s)	Blank(s)	T1	N0	M0	Blank(s)	Blank(s)	Blank(s)	L	L	Localized	Blank(s)	Blank(s)	30	4 or more regional lymph nodes removed	None; diagnosed at autopsy	No radiation and/or cancer-directed surgery	Surgery performed	None	Blank(s)	Blank(s)	Blank(s)	Blank(s)	Blank(s)	15	100	0	0	988	Blank(s)	Blank(s)
593	57	1946	2004	Female	White	C34.1-Upper lobe, lung	8013/3: Large cell neuroendocrine carcinoma	Unknown	8.3 Carcinoma of trachea,bronchus, and lung	Unclassified	XI(f) Other and unspecified carcinomas	Left - origin of primary	Positive histology	Blank(s)	IV	Blank(s)	Blank(s)	Blank(s)	Blank(s)	Blank(s)	T4	N3	M1	Blank(s)	Blank(s)	Blank(s)	D	D	Distant	Blank(s)	Blank(s)	0	None	Non-primary surgical procedure to distant site	Radiation after surgery	Not recommended	Beam radiation	Blank(s)	Blank(s)	Blank(s)	Blank(s)	Blank(s)	20	650	600	50	988	Blank(s)	Blank(s)
594	80	1922	2002	Male	White	C34.1-Upper lobe, lung	8013/3: Large cell neuroendocrine carcinoma	Unknown	8.3 Carcinoma of trachea,bronchus, and lung	Unclassified	XI(f) Other and unspecified carcinomas	Left - origin of primary	Positive histology	Blank(s)	Blank(s)	32	32	Blank(s)	Blank(s)	Blank(s)	Blank(s)	Blank(s)	Blank(s)	T4	N2	M0	Blank(s)	Blank(s)	Distant	Distant site(s)/node(s) involved	Blank(s)	0	Blank(s)	Blank(s)	No radiation and/or cancer-directed surgery	Not recommended	None	0	0	0	Blank(s)	Blank(s)	Blank(s)	Blank(s)	Blank(s)	Blank(s)	Blank(s)	Blank(s)	Blank(s)
595	70	1942	2013	Female	White	C34.1-Upper lobe, lung	8013/3: Large cell neuroendocrine carcinoma	Unknown	8.3 Carcinoma of trachea,bronchus, and lung	Unclassified	XI(f) Other and unspecified carcinomas	Right - origin of primary	Positive histology	IV	IV	Blank(s)	Blank(s)	T1b	N1	M1b	T1	N1	M1	Blank(s)	Blank(s)	Blank(s)	D	D	Distant	Blank(s)	Blank(s)	0	None	None; diagnosed at autopsy	No radiation and/or cancer-directed surgery	Not recommended	Beam radiation	Blank(s)	Blank(s)	Blank(s)	Blank(s)	Blank(s)	26	100	100	40	0	998	Blank(s)
596	76	1933	2010	Female	White	C34.1-Upper lobe, lung	8013/3: Large cell neuroendocrine carcinoma	Unknown	8.3 Carcinoma of trachea,bronchus, and lung	Unclassified	XI(f) Other and unspecified carcinomas	Right - origin of primary	Positive histology	IV	IV	Blank(s)	Blank(s)	T3	N2	M1b	T4	N2	M1	Blank(s)	Blank(s)	Blank(s)	D	D	Distant	Blank(s)	Blank(s)	0	None	None; diagnosed at autopsy	No radiation and/or cancer-directed surgery	Not recommended	Beam radiation	Blank(s)	Blank(s)	Blank(s)	Blank(s)	Blank(s)	77	730	200	40	10	998	Blank(s)
597	67	1935	2002	Female	White	C34.2-Middle lobe, lung	8013/3: Large cell neuroendocrine carcinoma	Unknown	8.3 Carcinoma of trachea,bronchus, and lung	Unclassified	XI(f) Other and unspecified carcinomas	Right - origin of primary	Positive histology	Blank(s)	Blank(s)	10	10	Blank(s)	Blank(s)	Blank(s)	Blank(s)	Blank(s)	Blank(s)	T2	N0	M0	Blank(s)	Blank(s)	Regional	Regional by direct extension only	Blank(s)	30	Blank(s)	Blank(s)	No radiation and/or cancer-directed surgery	Surgery performed	None	2	1	0	Blank(s)	Blank(s)	Blank(s)	Blank(s)	Blank(s)	Blank(s)	Blank(s)	Blank(s)	Blank(s)
598	65	1935	2001	Female	White	C34.1-Upper lobe, lung	8013/3: Large cell neuroendocrine carcinoma	Unknown	8.3 Carcinoma of trachea,bronchus, and lung	Unclassified	XI(f) Other and unspecified carcinomas	Right - origin of primary	Positive histology	Blank(s)	Blank(s)	32	32	Blank(s)	Blank(s)	Blank(s)	Blank(s)	Blank(s)	Blank(s)	T4	N2	M0	Blank(s)	Blank(s)	Distant	Distant site(s)/node(s) involved	Blank(s)	0	Blank(s)	Blank(s)	No radiation and/or cancer-directed surgery	Not recommended	Beam radiation	0	0	0	Blank(s)	Blank(s)	Blank(s)	Blank(s)	Blank(s)	Blank(s)	Blank(s)	Blank(s)	Blank(s)
599	65	1935	2001	Female	White	C34.3-Lower lobe, lung	8013/3: Large cell neuroendocrine carcinoma	Unknown	8.3 Carcinoma of trachea,bronchus, and lung	Unclassified	XI(f) Other and unspecified carcinomas	Left - origin of primary	Positive histology	Blank(s)	Blank(s)	10	10	Blank(s)	Blank(s)	Blank(s)	Blank(s)	Blank(s)	Blank(s)	T1	N0	M0	Blank(s)	Blank(s)	Localized	Localized only	Blank(s)	30	Blank(s)	Blank(s)	No radiation and/or cancer-directed surgery	Surgery performed	None	2	8	0	Blank(s)	Blank(s)	Blank(s)	Blank(s)	Blank(s)	Blank(s)	Blank(s)	Blank(s)	Blank(s)
600	57	1943	2001	Female	White	C34.9-Lung, NOS	8013/3: Large cell neuroendocrine carcinoma	Undifferentiated; anaplastic; Grade IV	8.3 Carcinoma of trachea,bronchus, and lung	Unclassified	XI(f) Other and unspecified carcinomas	Right - origin of primary	Positive histology	Blank(s)	Blank(s)	40	40	Blank(s)	Blank(s)	Blank(s)	Blank(s)	Blank(s)	Blank(s)	T4	NX	M1	Blank(s)	Blank(s)	Distant	Distant site(s)/node(s) involved	Blank(s)	0	Blank(s)	Blank(s)	No radiation and/or cancer-directed surgery	Not recommended	Beam radiation	0	0	0	Blank(s)	Blank(s)	Blank(s)	Blank(s)	Blank(s)	Blank(s)	Blank(s)	Blank(s)	Blank(s)
601	56	1944	2001	Female	White	C34.1-Upper lobe, lung	8013/3: Large cell neuroendocrine carcinoma	Undifferentiated; anaplastic; Grade IV	8.3 Carcinoma of trachea,bronchus, and lung	Unclassified	XI(f) Other and unspecified carcinomas	Left - origin of primary	Positive histology	Blank(s)	Blank(s)	31	31	Blank(s)	Blank(s)	Blank(s)	Blank(s)	Blank(s)	Blank(s)	T1	N2	M0	Blank(s)	Blank(s)	Regional	Regional lymph nodes involved only	Blank(s)	0	Blank(s)	Blank(s)	No radiation and/or cancer-directed surgery	Not recommended	None	0	0	0	Blank(s)	Blank(s)	Blank(s)	Blank(s)	Blank(s)	Blank(s)	Blank(s)	Blank(s)	Blank(s)
602	66	1935	2002	Male	White	C34.1-Upper lobe, lung	8013/3: Large cell neuroendocrine carcinoma	Undifferentiated; anaplastic; Grade IV	8.3 Carcinoma of trachea,bronchus, and lung	Unclassified	XI(f) Other and unspecified carcinomas	Left - origin of primary	Positive histology	Blank(s)	Blank(s)	32	32	Blank(s)	Blank(s)	Blank(s)	Blank(s)	Blank(s)	Blank(s)	T4	N2	M0	Blank(s)	Blank(s)	Regional	Regional by both direct extension and lymph node involvement	Blank(s)	0	Blank(s)	Blank(s)	No radiation and/or cancer-directed surgery	Not recommended	Beam radiation	0	0	0	Blank(s)	Blank(s)	Blank(s)	Blank(s)	Blank(s)	Blank(s)	Blank(s)	Blank(s)	Blank(s)
603	79	1922	2002	Female	White	C34.2-Middle lobe, lung	8013/3: Large cell neuroendocrine carcinoma	Unknown	8.3 Carcinoma of trachea,bronchus, and lung	Unclassified	XI(f) Other and unspecified carcinomas	Right - origin of primary	Positive histology	Blank(s)	Blank(s)	10	10	Blank(s)	Blank(s)	Blank(s)	Blank(s)	Blank(s)	Blank(s)	T2	N0	M0	Blank(s)	Blank(s)	Regional	Regional by direct extension only	Blank(s)	30	Blank(s)	Blank(s)	No radiation and/or cancer-directed surgery	Surgery performed	None	0	0	0	Blank(s)	Blank(s)	Blank(s)	Blank(s)	Blank(s)	Blank(s)	Blank(s)	Blank(s)	Blank(s)
604	67	1934	2001	Female	White	C34.3-Lower lobe, lung	8013/3: Large cell neuroendocrine carcinoma	Unknown	8.3 Carcinoma of trachea,bronchus, and lung	Unclassified	XI(f) Other and unspecified carcinomas	Left - origin of primary	Positive histology	Blank(s)	Blank(s)	20	20	Blank(s)	Blank(s)	Blank(s)	Blank(s)	Blank(s)	Blank(s)	T2	N1	M0	Blank(s)	Blank(s)	Regional	Regional lymph nodes involved only	Blank(s)	30	Blank(s)	Blank(s)	Radiation after surgery	Surgery performed	Beam radiation	6	6	0	Blank(s)	Blank(s)	Blank(s)	Blank(s)	Blank(s)	Blank(s)	Blank(s)	Blank(s)	Blank(s)
605	56	1945	2001	Female	White	C34.0-Main bronchus	8013/3: Large cell neuroendocrine carcinoma	Unknown	8.3 Carcinoma of trachea,bronchus, and lung	Unclassified	XI(f) Other and unspecified carcinomas	Left - origin of primary	Positive histology	Blank(s)	Blank(s)	40	40	Blank(s)	Blank(s)	Blank(s)	Blank(s)	Blank(s)	Blank(s)	TX	N0	M1	Blank(s)	Blank(s)	Distant	Distant site(s)/node(s) involved	Blank(s)	0	Blank(s)	Blank(s)	Radiation after surgery	Surgery performed	Beam radiation	0	0	6	Blank(s)	Blank(s)	Blank(s)	Blank(s)	Blank(s)	Blank(s)	Blank(s)	Blank(s)	Blank(s)
606	77	1933	2010	Male	White	C34.1-Upper lobe, lung	8013/3: Large cell neuroendocrine carcinoma	Poorly differentiated; Grade III	8.3 Carcinoma of trachea,bronchus, and lung	Unclassified	XI(f) Other and unspecified carcinomas	Right - origin of primary	Positive histology	IA	IA	Blank(s)	Blank(s)	T1a	N0	M0	T1	N0	M0	Blank(s)	Blank(s)	Blank(s)	L	L	Localized	Blank(s)	Blank(s)	30	1 to 3 regional lymph nodes removed	None; diagnosed at autopsy	No radiation and/or cancer-directed surgery	Surgery performed	None	Blank(s)	Blank(s)	Blank(s)	Blank(s)	Blank(s)	20	100	0	0	0	0	Blank(s)
607	79	1922	2002	Female	White	C34.2-Middle lobe, lung	8013/3: Large cell neuroendocrine carcinoma	Unknown	8.3 Carcinoma of trachea,bronchus, and lung	Unclassified	XI(f) Other and unspecified carcinomas	Right - origin of primary	Positive histology	Blank(s)	Blank(s)	32	32	Blank(s)	Blank(s)	Blank(s)	Blank(s)	Blank(s)	Blank(s)	T4	N2	M0	Blank(s)	Blank(s)	Distant	Distant site(s)/node(s) involved	Blank(s)	0	Blank(s)	Blank(s)	No radiation and/or cancer-directed surgery	Not recommended	None	0	0	0	Blank(s)	Blank(s)	Blank(s)	Blank(s)	Blank(s)	Blank(s)	Blank(s)	Blank(s)	Blank(s)
608	64	1937	2001	Female	White	C34.1-Upper lobe, lung	8013/3: Large cell neuroendocrine carcinoma	Undifferentiated; anaplastic; Grade IV	8.3 Carcinoma of trachea,bronchus, and lung	Unclassified	XI(f) Other and unspecified carcinomas	Right - origin of primary	Positive histology	Blank(s)	Blank(s)	40	40	Blank(s)	Blank(s)	Blank(s)	Blank(s)	Blank(s)	Blank(s)	TX	N0	M1	Blank(s)	Blank(s)	Distant	Distant site(s)/node(s) involved	Blank(s)	30	Blank(s)	Blank(s)	Radiation after surgery	Surgery performed	Beam radiation	0	0	0	Blank(s)	Blank(s)	Blank(s)	Blank(s)	Blank(s)	Blank(s)	Blank(s)	Blank(s)	Blank(s)
609	63	1939	2002	Female	White	C34.1-Upper lobe, lung	8013/3: Large cell neuroendocrine carcinoma	Unknown	8.3 Carcinoma of trachea,bronchus, and lung	Unclassified	XI(f) Other and unspecified carcinomas	Left - origin of primary	Positive histology	Blank(s)	Blank(s)	20	20	Blank(s)	Blank(s)	Blank(s)	Blank(s)	Blank(s)	Blank(s)	T1	N1	M0	Blank(s)	Blank(s)	Regional	Regional lymph nodes involved only	Blank(s)	30	Blank(s)	Blank(s)	No radiation and/or cancer-directed surgery	Surgery performed	None	6	10	0	Blank(s)	Blank(s)	Blank(s)	Blank(s)	Blank(s)	Blank(s)	Blank(s)	Blank(s)	Blank(s)
610	71	1931	2003	Male	White	C34.1-Upper lobe, lung	8013/3: Large cell neuroendocrine carcinoma	Poorly differentiated; Grade III	8.3 Carcinoma of trachea,bronchus, and lung	Unclassified	XI(f) Other and unspecified carcinomas	Right - origin of primary	Positive histology	Blank(s)	Blank(s)	10	10	Blank(s)	Blank(s)	Blank(s)	Blank(s)	Blank(s)	Blank(s)	T2	N0	M0	Blank(s)	Blank(s)	Regional	Regional by direct extension only	Blank(s)	0	4 or more regional lymph nodes removed	None; diagnosed at autopsy	Radiation after surgery	Not recommended	Beam radiation	Blank(s)	Blank(s)	Blank(s)	Blank(s)	Blank(s)	Blank(s)	Blank(s)	Blank(s)	Blank(s)	Blank(s)	Blank(s)	Blank(s)
611	54	1948	2002	Female	White	C34.1-Upper lobe, lung	8013/3: Large cell neuroendocrine carcinoma	Poorly differentiated; Grade III	8.3 Carcinoma of trachea,bronchus, and lung	Unclassified	XI(f) Other and unspecified carcinomas	Right - origin of primary	Positive histology	Blank(s)	Blank(s)	20	20	Blank(s)	Blank(s)	Blank(s)	Blank(s)	Blank(s)	Blank(s)	T1	N1	M0	Blank(s)	Blank(s)	Regional	Regional lymph nodes involved only	Blank(s)	30	Blank(s)	Blank(s)	No radiation and/or cancer-directed surgery	Surgery performed	None	6	12	0	Blank(s)	Blank(s)	Blank(s)	Blank(s)	Blank(s)	Blank(s)	Blank(s)	Blank(s)	Blank(s)
612	65	1937	2003	Male	White	C34.3-Lower lobe, lung	8013/3: Large cell neuroendocrine carcinoma	Unknown	8.3 Carcinoma of trachea,bronchus, and lung	Unclassified	XI(f) Other and unspecified carcinomas	Left - origin of primary	Positive histology	Blank(s)	Blank(s)	90	90	Blank(s)	Blank(s)	Blank(s)	Blank(s)	Blank(s)	Blank(s)	TX	N1	MX	Blank(s)	Blank(s)	Unknown/unstaged	Unknown/unstaged/unspecified/DCO	Blank(s)	0	Biopsy or aspiration of regional lymph node, NOS	None; diagnosed at autopsy	No radiation and/or cancer-directed surgery	Not recommended	None	Blank(s)	Blank(s)	Blank(s)	Blank(s)	Blank(s)	Blank(s)	Blank(s)	Blank(s)	Blank(s)	Blank(s)	Blank(s)	Blank(s)
613	72	1930	2002	Female	White	C34.1-Upper lobe, lung	8013/3: Large cell neuroendocrine carcinoma	Unknown	8.3 Carcinoma of trachea,bronchus, and lung	Unclassified	XI(f) Other and unspecified carcinomas	Right - origin of primary	Positive histology	Blank(s)	Blank(s)	10	10	Blank(s)	Blank(s)	Blank(s)	Blank(s)	Blank(s)	Blank(s)	T1	N0	M0	Blank(s)	Blank(s)	Localized	Localized only	Blank(s)	30	Blank(s)	Blank(s)	No radiation and/or cancer-directed surgery	Surgery performed	None	2	3	0	Blank(s)	Blank(s)	Blank(s)	Blank(s)	Blank(s)	Blank(s)	Blank(s)	Blank(s)	Blank(s)
614	55	1947	2003	Female	White	C34.1-Upper lobe, lung	8013/3: Large cell neuroendocrine carcinoma	Unknown	8.3 Carcinoma of trachea,bronchus, and lung	Unclassified	XI(f) Other and unspecified carcinomas	Right - origin of primary	Positive histology	Blank(s)	Blank(s)	32	32	Blank(s)	Blank(s)	Blank(s)	Blank(s)	Blank(s)	Blank(s)	T4	N3	M0	Blank(s)	Blank(s)	Distant	Distant site(s)/node(s) involved	Blank(s)	0	None	None; diagnosed at autopsy	No radiation and/or cancer-directed surgery	Not recommended	Beam radiation	Blank(s)	Blank(s)	Blank(s)	Blank(s)	Blank(s)	Blank(s)	Blank(s)	Blank(s)	Blank(s)	Blank(s)	Blank(s)	Blank(s)
615	70	1940	2011	Male	White	C34.1-Upper lobe, lung	8013/3: Large cell neuroendocrine carcinoma	Unknown	8.3 Carcinoma of trachea,bronchus, and lung	Unclassified	XI(f) Other and unspecified carcinomas	Left - origin of primary	Positive histology	IA	IA	Blank(s)	Blank(s)	T1a	N0	M0	T1	N0	M0	Blank(s)	Blank(s)	Blank(s)	L	L	Localized	Blank(s)	Blank(s)	21	Biopsy or aspiration of regional lymph node, NOS	None; diagnosed at autopsy	No radiation and/or cancer-directed surgery	Surgery performed	None	Blank(s)	Blank(s)	Blank(s)	Blank(s)	Blank(s)	11	100	0	0	0	0	Blank(s)
616	65	1937	2002	Male	White	C34.1-Upper lobe, lung	8013/3: Large cell neuroendocrine carcinoma	Unknown	8.3 Carcinoma of trachea,bronchus, and lung	Unclassified	XI(f) Other and unspecified carcinomas	Bilateral, single primary	Positive histology	Blank(s)	Blank(s)	40	40	Blank(s)	Blank(s)	Blank(s)	Blank(s)	Blank(s)	Blank(s)	TX	N2	M1	Blank(s)	Blank(s)	Distant	Distant site(s)/node(s) involved	Blank(s)	0	Blank(s)	Blank(s)	No radiation and/or cancer-directed surgery	Not recommended	Beam radiation	0	0	0	Blank(s)	Blank(s)	Blank(s)	Blank(s)	Blank(s)	Blank(s)	Blank(s)	Blank(s)	Blank(s)
617	59	1943	2002	Male	White	C34.3-Lower lobe, lung	8013/3: Large cell neuroendocrine carcinoma	Poorly differentiated; Grade III	8.3 Carcinoma of trachea,bronchus, and lung	Unclassified	XI(f) Other and unspecified carcinomas	Right - origin of primary	Positive histology	Blank(s)	Blank(s)	32	32	Blank(s)	Blank(s)	Blank(s)	Blank(s)	Blank(s)	Blank(s)	T4	N0	M0	Blank(s)	Blank(s)	Regional	Regional by direct extension only	Blank(s)	30	Blank(s)	Blank(s)	No radiation and/or cancer-directed surgery	Surgery performed	None	3	4	0	Blank(s)	Blank(s)	Blank(s)	Blank(s)	Blank(s)	Blank(s)	Blank(s)	Blank(s)	Blank(s)
618	64	1939	2003	Male	White	C34.1-Upper lobe, lung	8013/3: Large cell neuroendocrine carcinoma	Unknown	8.3 Carcinoma of trachea,bronchus, and lung	Unclassified	XI(f) Other and unspecified carcinomas	Left - origin of primary	Positive histology	Blank(s)	Blank(s)	90	31	Blank(s)	Blank(s)	Blank(s)	Blank(s)	Blank(s)	Blank(s)	TXc	N2	M0	Blank(s)	Blank(s)	Regional	Regional lymph nodes involved only	Blank(s)	0	None	None; diagnosed at autopsy	No radiation and/or cancer-directed surgery	Not recommended	None	Blank(s)	Blank(s)	Blank(s)	Blank(s)	Blank(s)	Blank(s)	Blank(s)	Blank(s)	Blank(s)	Blank(s)	Blank(s)	Blank(s)
619	66	1937	2003	Male	White	C34.3-Lower lobe, lung	8013/3: Large cell neuroendocrine carcinoma	Unknown	8.3 Carcinoma of trachea,bronchus, and lung	Unclassified	XI(f) Other and unspecified carcinomas	Right - origin of primary	Positive histology	Blank(s)	Blank(s)	90	10	Blank(s)	Blank(s)	Blank(s)	Blank(s)	Blank(s)	Blank(s)	TXc	N0	M0	Blank(s)	Blank(s)	Localized	Localized only	Blank(s)	33	4 or more regional lymph nodes removed	None; diagnosed at autopsy	No radiation and/or cancer-directed surgery	Surgery performed	None	Blank(s)	Blank(s)	Blank(s)	Blank(s)	Blank(s)	Blank(s)	Blank(s)	Blank(s)	Blank(s)	Blank(s)	Blank(s)	Blank(s)
620	48	1955	2003	Male	White	C34.3-Lower lobe, lung	8013/3: Large cell neuroendocrine carcinoma	Unknown	8.3 Carcinoma of trachea,bronchus, and lung	Unclassified	XI(f) Other and unspecified carcinomas	Right - origin of primary	Positive histology	Blank(s)	Blank(s)	90	31	Blank(s)	Blank(s)	Blank(s)	Blank(s)	Blank(s)	Blank(s)	TXa	N2	M0	Blank(s)	Blank(s)	Regional	Regional lymph nodes involved only	Blank(s)	0	None	None; diagnosed at autopsy	No radiation and/or cancer-directed surgery	Not recommended	Beam radiation	Blank(s)	Blank(s)	Blank(s)	Blank(s)	Blank(s)	Blank(s)	Blank(s)	Blank(s)	Blank(s)	Blank(s)	Blank(s)	Blank(s)
621	55	1948	2004	Male	White	C34.1-Upper lobe, lung	8013/3: Large cell neuroendocrine carcinoma	Unknown	8.3 Carcinoma of trachea,bronchus, and lung	Unclassified	XI(f) Other and unspecified carcinomas	Right - origin of primary	Positive histology	Blank(s)	IIB	Blank(s)	Blank(s)	Blank(s)	Blank(s)	Blank(s)	T2	N1	M0	Blank(s)	Blank(s)	Blank(s)	RN	RN	Regional	Blank(s)	Blank(s)	30	1 to 3 regional lymph nodes removed	None; diagnosed at autopsy	No radiation and/or cancer-directed surgery	Surgery performed	None	Blank(s)	Blank(s)	Blank(s)	Blank(s)	Blank(s)	49	100	100	0	988	Blank(s)	Blank(s)
622	37	1966	2003	Male	White	C34.9-Lung, NOS	8013/3: Large cell neuroendocrine carcinoma	Poorly differentiated; Grade III	8.3 Carcinoma of trachea,bronchus, and lung	Unclassified	XI(f) Other and unspecified carcinomas	Right - origin of primary	Positive histology	Blank(s)	Blank(s)	32	32	Blank(s)	Blank(s)	Blank(s)	Blank(s)	Blank(s)	Blank(s)	T4	N0	M0	Blank(s)	Blank(s)	Regional	Regional by direct extension only	Blank(s)	33	4 or more regional lymph nodes removed	None; diagnosed at autopsy	Radiation prior to surgery	Surgery performed	Beam radiation	Blank(s)	Blank(s)	Blank(s)	Blank(s)	Blank(s)	Blank(s)	Blank(s)	Blank(s)	Blank(s)	Blank(s)	Blank(s)	Blank(s)
623	68	1935	2003	Female	White	C34.1-Upper lobe, lung	8013/3: Large cell neuroendocrine carcinoma	Unknown	8.3 Carcinoma of trachea,bronchus, and lung	Unclassified	XI(f) Other and unspecified carcinomas	Left - origin of primary	Positive histology	Blank(s)	Blank(s)	32	32	Blank(s)	Blank(s)	Blank(s)	Blank(s)	Blank(s)	Blank(s)	T4	N2	M0	Blank(s)	Blank(s)	Regional	Regional by both direct extension and lymph node involvement	Blank(s)	21	1 to 3 regional lymph nodes removed	None; diagnosed at autopsy	Radiation after surgery	Surgery performed	Radiation, NOS method or source not specified	Blank(s)	Blank(s)	Blank(s)	Blank(s)	Blank(s)	Blank(s)	Blank(s)	Blank(s)	Blank(s)	Blank(s)	Blank(s)	Blank(s)
624	58	1945	2004	Male	White	C34.1-Upper lobe, lung	8013/3: Large cell neuroendocrine carcinoma	Poorly differentiated; Grade III	8.3 Carcinoma of trachea,bronchus, and lung	Unclassified	XI(f) Other and unspecified carcinomas	Right - origin of primary	Positive histology	Blank(s)	IIIA	Blank(s)	Blank(s)	Blank(s)	Blank(s)	Blank(s)	T3	N1	M0	Blank(s)	Blank(s)	Blank(s)	D	RE+RN	Regional	Blank(s)	Blank(s)	33	Number of regional lymph nodes removed unknown	None; diagnosed at autopsy	Radiation after surgery	Surgery performed	Radiation, NOS method or source not specified	Blank(s)	Blank(s)	Blank(s)	Blank(s)	Blank(s)	40	600	100	0	988	Blank(s)	Blank(s)
625	49	1954	2003	Female	Black	C34.1-Upper lobe, lung	8013/3: Large cell neuroendocrine carcinoma	Poorly differentiated; Grade III	8.3 Carcinoma of trachea,bronchus, and lung	Unclassified	XI(f) Other and unspecified carcinomas	Right - origin of primary	Positive histology	Blank(s)	Blank(s)	32	32	Blank(s)	Blank(s)	Blank(s)	Blank(s)	Blank(s)	Blank(s)	T4	N2	M0	Blank(s)	Blank(s)	Regional	Regional by both direct extension and lymph node involvement	Blank(s)	0	None	None; diagnosed at autopsy	No radiation and/or cancer-directed surgery	Not recommended	Beam radiation	Blank(s)	Blank(s)	Blank(s)	Blank(s)	Blank(s)	Blank(s)	Blank(s)	Blank(s)	Blank(s)	Blank(s)	Blank(s)	Blank(s)
626	54	1948	2003	Female	White	C34.1-Upper lobe, lung	8013/3: Large cell neuroendocrine carcinoma	Unknown	8.3 Carcinoma of trachea,bronchus, and lung	Unclassified	XI(f) Other and unspecified carcinomas	Right - origin of primary	Positive histology	Blank(s)	Blank(s)	40	40	Blank(s)	Blank(s)	Blank(s)	Blank(s)	Blank(s)	Blank(s)	TX	NX	M1	Blank(s)	Blank(s)	Distant	Distant site(s)/node(s) involved	Blank(s)	0	None	None; diagnosed at autopsy	No radiation and/or cancer-directed surgery	Not recommended	Beam radiation	Blank(s)	Blank(s)	Blank(s)	Blank(s)	Blank(s)	Blank(s)	Blank(s)	Blank(s)	Blank(s)	Blank(s)	Blank(s)	Blank(s)
627	76	1927	2004	Male	White	C34.1-Upper lobe, lung	8013/3: Large cell neuroendocrine carcinoma	Poorly differentiated; Grade III	8.3 Carcinoma of trachea,bronchus, and lung	Unclassified	XI(f) Other and unspecified carcinomas	Right - origin of primary	Positive histology	Blank(s)	IA	Blank(s)	Blank(s)	Blank(s)	Blank(s)	Blank(s)	T1	N0	M0	Blank(s)	Blank(s)	Blank(s)	L	L	Localized	Blank(s)	Blank(s)	21	1 to 3 regional lymph nodes removed	None; diagnosed at autopsy	No radiation and/or cancer-directed surgery	Surgery performed	None	Blank(s)	Blank(s)	Blank(s)	Blank(s)	Blank(s)	27	100	0	0	988	Blank(s)	Blank(s)
628	73	1931	2004	Female	White	C34.9-Lung, NOS	8013/3: Large cell neuroendocrine carcinoma	Unknown	8.3 Carcinoma of trachea,bronchus, and lung	Unclassified	XI(f) Other and unspecified carcinomas	Left - origin of primary	Positive histology	Blank(s)	IV	Blank(s)	Blank(s)	Blank(s)	Blank(s)	Blank(s)	T4	N2	M1	Blank(s)	Blank(s)	Blank(s)	D	D	Distant	Blank(s)	Blank(s)	0	None	Non-primary surgical procedure to distant lymph node(s)	Radiation after surgery	Not recommended	Beam radiation	Blank(s)	Blank(s)	Blank(s)	Blank(s)	Blank(s)	999	700	200	50	988	Blank(s)	Blank(s)
629	76	1927	2003	Male	White	C34.3-Lower lobe, lung	8013/3: Large cell neuroendocrine carcinoma	Poorly differentiated; Grade III	8.3 Carcinoma of trachea,bronchus, and lung	Unclassified	XI(f) Other and unspecified carcinomas	Right - origin of primary	Positive histology	Blank(s)	Blank(s)	40	40	Blank(s)	Blank(s)	Blank(s)	Blank(s)	Blank(s)	Blank(s)	TX	N2	M1	Blank(s)	Blank(s)	Distant	Distant site(s)/node(s) involved	Blank(s)	0	None	None; diagnosed at autopsy	No radiation and/or cancer-directed surgery	Not recommended	Combination of beam with implants or isotopes	Blank(s)	Blank(s)	Blank(s)	Blank(s)	Blank(s)	Blank(s)	Blank(s)	Blank(s)	Blank(s)	Blank(s)	Blank(s)	Blank(s)
630	45	1957	2002	Female	White	C34.3-Lower lobe, lung	8013/3: Large cell neuroendocrine carcinoma	Poorly differentiated; Grade III	8.3 Carcinoma of trachea,bronchus, and lung	Unclassified	XI(f) Other and unspecified carcinomas	Right - origin of primary	Positive histology	Blank(s)	Blank(s)	31	31	Blank(s)	Blank(s)	Blank(s)	Blank(s)	Blank(s)	Blank(s)	T2	N2	M0	Blank(s)	Blank(s)	Regional	Regional lymph nodes involved only	Blank(s)	0	Blank(s)	Blank(s)	No radiation and/or cancer-directed surgery	Not recommended	None	0	0	0	Blank(s)	Blank(s)	Blank(s)	Blank(s)	Blank(s)	Blank(s)	Blank(s)	Blank(s)	Blank(s)
631	89	1912	2002	Male	White	C34.1-Upper lobe, lung	8013/3: Large cell neuroendocrine carcinoma	Poorly differentiated; Grade III	8.3 Carcinoma of trachea,bronchus, and lung	Unclassified	XI(f) Other and unspecified carcinomas	Left - origin of primary	Positive histology	Blank(s)	Blank(s)	10	10	Blank(s)	Blank(s)	Blank(s)	Blank(s)	Blank(s)	Blank(s)	T1	N0	M0	Blank(s)	Blank(s)	Localized	Localized only	Blank(s)	21	Blank(s)	Blank(s)	No radiation and/or cancer-directed surgery	Surgery performed	None	0	0	0	Blank(s)	Blank(s)	Blank(s)	Blank(s)	Blank(s)	Blank(s)	Blank(s)	Blank(s)	Blank(s)
632	77	1927	2004	Male	White	C34.1-Upper lobe, lung	8013/3: Large cell neuroendocrine carcinoma	Unknown	8.3 Carcinoma of trachea,bronchus, and lung	Unclassified	XI(f) Other and unspecified carcinomas	Left - origin of primary	Positive histology	Blank(s)	IB	Blank(s)	Blank(s)	Blank(s)	Blank(s)	Blank(s)	T2	N0	M0	Blank(s)	Blank(s)	Blank(s)	RE	RE	Regional	Blank(s)	Blank(s)	21	None	None; diagnosed at autopsy	No radiation and/or cancer-directed surgery	Surgery performed	None	Blank(s)	Blank(s)	Blank(s)	Blank(s)	Blank(s)	25	450	0	0	988	Blank(s)	Blank(s)
633	66	1937	2004	Female	White	C34.3-Lower lobe, lung	8013/3: Large cell neuroendocrine carcinoma	Undifferentiated; anaplastic; Grade IV	8.3 Carcinoma of trachea,bronchus, and lung	Unclassified	XI(f) Other and unspecified carcinomas	Left - origin of primary	Positive histology	Blank(s)	IIA	Blank(s)	Blank(s)	Blank(s)	Blank(s)	Blank(s)	T1	N1	M0	Blank(s)	Blank(s)	Blank(s)	RN	RN	Regional	Blank(s)	Blank(s)	30	4 or more regional lymph nodes removed	None; diagnosed at autopsy	No radiation and/or cancer-directed surgery	Surgery performed	None	Blank(s)	Blank(s)	Blank(s)	Blank(s)	Blank(s)	20	100	800	0	988	Blank(s)	Blank(s)
634	71	1939	2011	Male	White	C34.9-Lung, NOS	8013/3: Large cell neuroendocrine carcinoma	Unknown	8.3 Carcinoma of trachea,bronchus, and lung	Unclassified	XI(f) Other and unspecified carcinomas	Bilateral, single primary	Positive histology	IV	IV	Blank(s)	Blank(s)	T3	N0	M1b	T4	N0	M1	Blank(s)	Blank(s)	Blank(s)	D	D	Distant	Blank(s)	Blank(s)	0	None	None; diagnosed at autopsy	No radiation and/or cancer-directed surgery	Not recommended	None	Blank(s)	Blank(s)	Blank(s)	Blank(s)	Blank(s)	9	400	0	42	40	998	Blank(s)
635	45	1958	2003	Male	White	C34.2-Middle lobe, lung	8013/3: Large cell neuroendocrine carcinoma	Unknown	8.3 Carcinoma of trachea,bronchus, and lung	Unclassified	XI(f) Other and unspecified carcinomas	Right - origin of primary	Positive histology	Blank(s)	Blank(s)	90	90	Blank(s)	Blank(s)	Blank(s)	Blank(s)	Blank(s)	Blank(s)	TX	N2	MX	Blank(s)	Blank(s)	Unknown/unstaged	Unknown/unstaged/unspecified/DCO	Blank(s)	0	None	None; diagnosed at autopsy	No radiation and/or cancer-directed surgery	Not recommended	Beam radiation	Blank(s)	Blank(s)	Blank(s)	Blank(s)	Blank(s)	Blank(s)	Blank(s)	Blank(s)	Blank(s)	Blank(s)	Blank(s)	Blank(s)
636	58	1944	2003	Male	White	C34.1-Upper lobe, lung	8013/3: Large cell neuroendocrine carcinoma	Unknown	8.3 Carcinoma of trachea,bronchus, and lung	Unclassified	XI(f) Other and unspecified carcinomas	Left - origin of primary	Positive histology	Blank(s)	Blank(s)	90	90	Blank(s)	Blank(s)	Blank(s)	Blank(s)	Blank(s)	Blank(s)	TX	N0	MX	Blank(s)	Blank(s)	Unknown/unstaged	Unknown/unstaged/unspecified/DCO	Blank(s)	21	1 to 3 regional lymph nodes removed	None; diagnosed at autopsy	Radiation after surgery	Surgery performed	Beam radiation	Blank(s)	Blank(s)	Blank(s)	Blank(s)	Blank(s)	Blank(s)	Blank(s)	Blank(s)	Blank(s)	Blank(s)	Blank(s)	Blank(s)
637	70	1934	2004	Female	White	C34.9-Lung, NOS	8013/3: Large cell neuroendocrine carcinoma	Unknown	8.3 Carcinoma of trachea,bronchus, and lung	Unclassified	XI(f) Other and unspecified carcinomas	Only one side - side unspecified	Positive histology	Blank(s)	IV	Blank(s)	Blank(s)	Blank(s)	Blank(s)	Blank(s)	T4	N3	M1	Blank(s)	Blank(s)	Blank(s)	D	D	Distant	Blank(s)	Blank(s)	0	Biopsy or aspiration of regional lymph node, NOS	None; diagnosed at autopsy	No radiation and/or cancer-directed surgery	Not recommended	None	Blank(s)	Blank(s)	Blank(s)	Blank(s)	Blank(s)	999	720	600	40	988	Blank(s)	Blank(s)
638	63	1942	2005	Female	White	C34.0-Main bronchus	8013/3: Large cell neuroendocrine carcinoma	Unknown	8.3 Carcinoma of trachea,bronchus, and lung	Unclassified	XI(f) Other and unspecified carcinomas	Right - origin of primary	Positive exfoliative cytology, no positive histology	Blank(s)	IV	Blank(s)	Blank(s)	Blank(s)	Blank(s)	Blank(s)	TX	N2	M1	Blank(s)	Blank(s)	Blank(s)	D	D	Distant	Blank(s)	Blank(s)	0	None	None; diagnosed at autopsy	No radiation and/or cancer-directed surgery	Not recommended	Beam radiation	Blank(s)	Blank(s)	Blank(s)	Blank(s)	Blank(s)	999	100	200	40	988	Blank(s)	Blank(s)
639	44	1961	2005	Male	White	C34.3-Lower lobe, lung	8013/3: Large cell neuroendocrine carcinoma	Unknown	8.3 Carcinoma of trachea,bronchus, and lung	Unclassified	XI(f) Other and unspecified carcinomas	Right - origin of primary	Positive histology	Blank(s)	IIIA	Blank(s)	Blank(s)	Blank(s)	Blank(s)	Blank(s)	T2	N2	M0	Blank(s)	Blank(s)	Blank(s)	RN	RN	Regional	Blank(s)	Blank(s)	33	1 to 3 regional lymph nodes removed	None; diagnosed at autopsy	No radiation and/or cancer-directed surgery	Surgery performed	None	Blank(s)	Blank(s)	Blank(s)	Blank(s)	Blank(s)	50	100	200	0	988	Blank(s)	Blank(s)
640	71	1934	2005	Female	White	C34.1-Upper lobe, lung	8013/3: Large cell neuroendocrine carcinoma	Unknown	8.3 Carcinoma of trachea,bronchus, and lung	Unclassified	XI(f) Other and unspecified carcinomas	Right - origin of primary	Positive histology	Blank(s)	IV	Blank(s)	Blank(s)	Blank(s)	Blank(s)	Blank(s)	T2	N2	M1	Blank(s)	Blank(s)	Blank(s)	D	D	Distant	Blank(s)	Blank(s)	0	None	None; diagnosed at autopsy	No radiation and/or cancer-directed surgery	Not recommended	None	Blank(s)	Blank(s)	Blank(s)	Blank(s)	Blank(s)	40	450	200	40	988	Blank(s)	Blank(s)
641	76	1930	2006	Male	White	C34.3-Lower lobe, lung	8013/3: Large cell neuroendocrine carcinoma	Unknown	8.3 Carcinoma of trachea,bronchus, and lung	Unclassified	XI(f) Other and unspecified carcinomas	Left - origin of primary	Positive histology	Blank(s)	IIB	Blank(s)	Blank(s)	Blank(s)	Blank(s)	Blank(s)	T2	N1	M0	Blank(s)	Blank(s)	Blank(s)	RN	RN	Regional	Blank(s)	Blank(s)	56	4 or more regional lymph nodes removed	None; diagnosed at autopsy	No radiation and/or cancer-directed surgery	Surgery performed	None	Blank(s)	Blank(s)	Blank(s)	Blank(s)	Blank(s)	64	100	100	0	988	Blank(s)	Blank(s)
642	58	1947	2006	Male	White	C34.9-Lung, NOS	8013/3: Large cell neuroendocrine carcinoma	Unknown	8.3 Carcinoma of trachea,bronchus, and lung	Unclassified	XI(f) Other and unspecified carcinomas	Paired site, but no information concerning laterality	Positive histology	Blank(s)	IV	Blank(s)	Blank(s)	Blank(s)	Blank(s)	Blank(s)	T4	N3	M1	Blank(s)	Blank(s)	Blank(s)	D	D	Distant	Blank(s)	Blank(s)	0	None	None; diagnosed at autopsy	No radiation and/or cancer-directed surgery	Not recommended	Beam radiation	Blank(s)	Blank(s)	Blank(s)	Blank(s)	Blank(s)	130	700	600	30	988	Blank(s)	Blank(s)
643	80	1926	2006	Female	White	C34.3-Lower lobe, lung	8013/3: Large cell neuroendocrine carcinoma	Poorly differentiated; Grade III	8.3 Carcinoma of trachea,bronchus, and lung	Unclassified	XI(f) Other and unspecified carcinomas	Right - origin of primary	Positive histology	Blank(s)	IIIB	Blank(s)	Blank(s)	Blank(s)	Blank(s)	Blank(s)	T4	N1	M0	Blank(s)	Blank(s)	Blank(s)	RN	RE+RN	Regional	Blank(s)	Blank(s)	0	None	None; diagnosed at autopsy	No radiation and/or cancer-directed surgery	Unknown; death certificate; or autopsy only (2003+)	None	Blank(s)	Blank(s)	Blank(s)	Blank(s)	Blank(s)	30	650	100	0	988	Blank(s)	Blank(s)
644	79	1927	2006	Male	White	C34.3-Lower lobe, lung	8013/3: Large cell neuroendocrine carcinoma	Unknown	8.3 Carcinoma of trachea,bronchus, and lung	Unclassified	XI(f) Other and unspecified carcinomas	Right - origin of primary	Positive histology	Blank(s)	IV	Blank(s)	Blank(s)	Blank(s)	Blank(s)	Blank(s)	T4	N2	M1	Blank(s)	Blank(s)	Blank(s)	D	D	Distant	Blank(s)	Blank(s)	0	None	Non-primary surgical procedure to other regional sites	No radiation and/or cancer-directed surgery	Not recommended	None	Blank(s)	Blank(s)	Blank(s)	Blank(s)	Blank(s)	28	650	200	23	988	Blank(s)	Blank(s)
645	66	1940	2006	Female	White	C34.1-Upper lobe, lung	8013/3: Large cell neuroendocrine carcinoma	Poorly differentiated; Grade III	8.3 Carcinoma of trachea,bronchus, and lung	Unclassified	XI(f) Other and unspecified carcinomas	Left - origin of primary	Positive histology	Blank(s)	IIIB	Blank(s)	Blank(s)	Blank(s)	Blank(s)	Blank(s)	T4	N0	M0	Blank(s)	Blank(s)	Blank(s)	RE	RE	Regional	Blank(s)	Blank(s)	0	Number of regional lymph nodes removed unknown	None; diagnosed at autopsy	Radiation after surgery	Not recommended	Beam radiation	Blank(s)	Blank(s)	Blank(s)	Blank(s)	Blank(s)	120	700	0	0	988	Blank(s)	Blank(s)
646	83	1928	2011	Male	Other (American Indian/AK Native, Asian/Pacific Islander)	C34.0-Main bronchus	8013/3: Large cell neuroendocrine carcinoma	Undifferentiated; anaplastic; Grade IV	8.3 Carcinoma of trachea,bronchus, and lung	Unclassified	XI(f) Other and unspecified carcinomas	Right - origin of primary	Positive histology	IV	IV	Blank(s)	Blank(s)	T4	N3	M1a	T4	N3	M1	Blank(s)	Blank(s)	Blank(s)	D	D	Distant	Blank(s)	Blank(s)	0	None	None; diagnosed at autopsy	No radiation and/or cancer-directed surgery	Not recommended	None	Blank(s)	Blank(s)	Blank(s)	Blank(s)	Blank(s)	14	700	600	25	40	998	Blank(s)
647	66	1939	2006	Female	White	C34.1-Upper lobe, lung	8013/3: Large cell neuroendocrine carcinoma	Unknown	8.3 Carcinoma of trachea,bronchus, and lung	Unclassified	XI(f) Other and unspecified carcinomas	Right - origin of primary	Positive histology	Blank(s)	IV	Blank(s)	Blank(s)	Blank(s)	Blank(s)	Blank(s)	TX	N2	M1	Blank(s)	Blank(s)	Blank(s)	D	D	Distant	Blank(s)	Blank(s)	0	Number of regional lymph nodes removed unknown	None; diagnosed at autopsy	No radiation and/or cancer-directed surgery	Not recommended	None	Blank(s)	Blank(s)	Blank(s)	Blank(s)	Blank(s)	999	100	200	30	988	Blank(s)	Blank(s)
648	85	1922	2007	Female	White	C34.1-Upper lobe, lung	8013/3: Large cell neuroendocrine carcinoma	Unknown	8.3 Carcinoma of trachea,bronchus, and lung	Unclassified	XI(f) Other and unspecified carcinomas	Right - origin of primary	Positive histology	Blank(s)	IV	Blank(s)	Blank(s)	Blank(s)	Blank(s)	Blank(s)	T4	N2	M1	Blank(s)	Blank(s)	Blank(s)	D	D	Distant	Blank(s)	Blank(s)	0	None	None; diagnosed at autopsy	No radiation and/or cancer-directed surgery	Not recommended	None	Blank(s)	Blank(s)	Blank(s)	Blank(s)	Blank(s)	25	720	200	40	988	Blank(s)	Blank(s)
649	60	1947	2007	Male	White	C34.1-Upper lobe, lung	8013/3: Large cell neuroendocrine carcinoma	Unknown	8.3 Carcinoma of trachea,bronchus, and lung	Unclassified	XI(f) Other and unspecified carcinomas	Left - origin of primary	Positive histology	Blank(s)	IV	Blank(s)	Blank(s)	Blank(s)	Blank(s)	Blank(s)	T2	N2	M1	Blank(s)	Blank(s)	Blank(s)	D	D	Distant	Blank(s)	Blank(s)	0	None	None; diagnosed at autopsy	No radiation and/or cancer-directed surgery	Not recommended	Beam radiation	Blank(s)	Blank(s)	Blank(s)	Blank(s)	Blank(s)	40	300	200	40	988	Blank(s)	Blank(s)
650	72	1935	2007	Male	White	C34.1-Upper lobe, lung	8013/3: Large cell neuroendocrine carcinoma	Unknown	8.3 Carcinoma of trachea,bronchus, and lung	Unclassified	XI(f) Other and unspecified carcinomas	Right - origin of primary	Positive histology	Blank(s)	IV	Blank(s)	Blank(s)	Blank(s)	Blank(s)	Blank(s)	TX	N2	M1	Blank(s)	Blank(s)	Blank(s)	D	D	Distant	Blank(s)	Blank(s)	0	None	None; diagnosed at autopsy	No radiation and/or cancer-directed surgery	Not recommended	Beam radiation	Blank(s)	Blank(s)	Blank(s)	Blank(s)	Blank(s)	999	100	200	40	988	Blank(s)	Blank(s)
651	84	1928	2013	Female	White	C34.3-Lower lobe, lung	8013/3: Large cell neuroendocrine carcinoma	Poorly differentiated; Grade III	8.3 Carcinoma of trachea,bronchus, and lung	Unclassified	XI(f) Other and unspecified carcinomas	Right - origin of primary	Positive histology	UNK Stage	UNK Stage	Blank(s)	Blank(s)	T3	NX	M0	T4	NX	MX	Blank(s)	Blank(s)	Blank(s)	L	RE	Regional	Blank(s)	Blank(s)	0	None	None; diagnosed at autopsy	No radiation and/or cancer-directed surgery	Not recommended	None	Blank(s)	Blank(s)	Blank(s)	Blank(s)	Blank(s)	32	100	999	99	40	998	Blank(s)
652	71	1936	2008	Female	White	C34.3-Lower lobe, lung	8013/3: Large cell neuroendocrine carcinoma	Poorly differentiated; Grade III	8.3 Carcinoma of trachea,bronchus, and lung	Unclassified	XI(f) Other and unspecified carcinomas	Left - origin of primary	Positive histology	Blank(s)	IA	Blank(s)	Blank(s)	Blank(s)	Blank(s)	Blank(s)	T1	N0	M0	Blank(s)	Blank(s)	Blank(s)	L	L	Localized	Blank(s)	Blank(s)	21	None	None; diagnosed at autopsy	No radiation and/or cancer-directed surgery	Surgery performed	None	Blank(s)	Blank(s)	Blank(s)	Blank(s)	Blank(s)	15	100	0	0	988	Blank(s)	Blank(s)
653	66	1940	2007	Female	White	C34.0-Main bronchus	8013/3: Large cell neuroendocrine carcinoma	Poorly differentiated; Grade III	8.3 Carcinoma of trachea,bronchus, and lung	Unclassified	XI(f) Other and unspecified carcinomas	Left - origin of primary	Positive histology	Blank(s)	IV	Blank(s)	Blank(s)	Blank(s)	Blank(s)	Blank(s)	T4	N2	M1	Blank(s)	Blank(s)	Blank(s)	D	D	Distant	Blank(s)	Blank(s)	0	None	None; diagnosed at autopsy	No radiation and/or cancer-directed surgery	Not recommended	Beam radiation	Blank(s)	Blank(s)	Blank(s)	Blank(s)	Blank(s)	58	650	200	40	988	Blank(s)	Blank(s)
654	56	1951	2007	Male	White	C34.1-Upper lobe, lung	8013/3: Large cell neuroendocrine carcinoma	Unknown	8.3 Carcinoma of trachea,bronchus, and lung	Unclassified	XI(f) Other and unspecified carcinomas	Left - origin of primary	Positive histology	Blank(s)	IV	Blank(s)	Blank(s)	Blank(s)	Blank(s)	Blank(s)	T1	N0	M1	Blank(s)	Blank(s)	Blank(s)	D	D	Distant	Blank(s)	Blank(s)	0	None	None; diagnosed at autopsy	No radiation and/or cancer-directed surgery	Not recommended, contraindicated due to other cond; autopsy only (1973-2002)	Beam radiation	Blank(s)	Blank(s)	Blank(s)	Blank(s)	Blank(s)	19	100	0	40	988	Blank(s)	Blank(s)
655	62	1944	2007	Male	White	C34.3-Lower lobe, lung	8013/3: Large cell neuroendocrine carcinoma	Unknown	8.3 Carcinoma of trachea,bronchus, and lung	Unclassified	XI(f) Other and unspecified carcinomas	Right - origin of primary	Positive histology	Blank(s)	IIIA	Blank(s)	Blank(s)	Blank(s)	Blank(s)	Blank(s)	TX	N2	M0	Blank(s)	Blank(s)	Blank(s)	RN	RN	Regional	Blank(s)	Blank(s)	0	1 to 3 regional lymph nodes removed	None; diagnosed at autopsy	No radiation and/or cancer-directed surgery	Not recommended	None	Blank(s)	Blank(s)	Blank(s)	Blank(s)	Blank(s)	999	300	200	0	988	Blank(s)	Blank(s)
656	82	1925	2007	Male	White	C34.1-Upper lobe, lung	8013/3: Large cell neuroendocrine carcinoma	Unknown	8.3 Carcinoma of trachea,bronchus, and lung	Unclassified	XI(f) Other and unspecified carcinomas	Left - origin of primary	Positive exfoliative cytology, no positive histology	Blank(s)	IV	Blank(s)	Blank(s)	Blank(s)	Blank(s)	Blank(s)	T4	N3	M1	Blank(s)	Blank(s)	Blank(s)	D	D	Distant	Blank(s)	Blank(s)	0	None	None; diagnosed at autopsy	No radiation and/or cancer-directed surgery	Not recommended	None	Blank(s)	Blank(s)	Blank(s)	Blank(s)	Blank(s)	61	700	600	40	988	Blank(s)	Blank(s)
657	72	1935	2007	Female	White	C34.9-Lung, NOS	8013/3: Large cell neuroendocrine carcinoma	Undifferentiated; anaplastic; Grade IV	8.3 Carcinoma of trachea,bronchus, and lung	Unclassified	XI(f) Other and unspecified carcinomas	Right - origin of primary	Positive histology	Blank(s)	IV	Blank(s)	Blank(s)	Blank(s)	Blank(s)	Blank(s)	T4	N0	M1	Blank(s)	Blank(s)	Blank(s)	RE	D	Distant	Blank(s)	Blank(s)	0	None	None; diagnosed at autopsy	No radiation and/or cancer-directed surgery	Not recommended, contraindicated due to other cond; autopsy only (1973-2002)	Beam radiation	Blank(s)	Blank(s)	Blank(s)	Blank(s)	Blank(s)	90	700	0	35	988	Blank(s)	Blank(s)
658	75	1932	2007	Female	White	C34.1-Upper lobe, lung	8013/3: Large cell neuroendocrine carcinoma	Unknown	8.3 Carcinoma of trachea,bronchus, and lung	Unclassified	XI(f) Other and unspecified carcinomas	Right - origin of primary	Positive histology	Blank(s)	IV	Blank(s)	Blank(s)	Blank(s)	Blank(s)	Blank(s)	T2	N2	M1	Blank(s)	Blank(s)	Blank(s)	D	D	Distant	Blank(s)	Blank(s)	33	4 or more regional lymph nodes removed	Non-primary surgical procedure to distant site	Radiation after surgery	Surgery performed	Beam radiation	Blank(s)	Blank(s)	Blank(s)	Blank(s)	Blank(s)	30	200	200	40	988	Blank(s)	Blank(s)
659	72	1934	2007	Female	White	C34.2-Middle lobe, lung	8013/3: Large cell neuroendocrine carcinoma	Unknown	8.3 Carcinoma of trachea,bronchus, and lung	Unclassified	XI(f) Other and unspecified carcinomas	Right - origin of primary	Positive histology	Blank(s)	IA	Blank(s)	Blank(s)	Blank(s)	Blank(s)	Blank(s)	T1	N0	M0	Blank(s)	Blank(s)	Blank(s)	L	L	Localized	Blank(s)	Blank(s)	33	4 or more regional lymph nodes removed	None; diagnosed at autopsy	No radiation and/or cancer-directed surgery	Surgery performed	None	Blank(s)	Blank(s)	Blank(s)	Blank(s)	Blank(s)	15	100	0	0	988	Blank(s)	Blank(s)
660	78	1929	2008	Male	White	C34.1-Upper lobe, lung	8013/3: Large cell neuroendocrine carcinoma	Poorly differentiated; Grade III	8.3 Carcinoma of trachea,bronchus, and lung	Unclassified	XI(f) Other and unspecified carcinomas	Right - origin of primary	Positive histology	Blank(s)	IV	Blank(s)	Blank(s)	Blank(s)	Blank(s)	Blank(s)	TX	NX	M1	Blank(s)	Blank(s)	Blank(s)	D	D	Distant	Blank(s)	Blank(s)	0	None	None; diagnosed at autopsy	No radiation and/or cancer-directed surgery	Not recommended	None	Blank(s)	Blank(s)	Blank(s)	Blank(s)	Blank(s)	999	999	999	30	988	Blank(s)	Blank(s)
661	77	1931	2008	Male	White	C34.1-Upper lobe, lung	8013/3: Large cell neuroendocrine carcinoma	Unknown	8.3 Carcinoma of trachea,bronchus, and lung	Unclassified	XI(f) Other and unspecified carcinomas	Right - origin of primary	Positive exfoliative cytology, no positive histology	Blank(s)	IV	Blank(s)	Blank(s)	Blank(s)	Blank(s)	Blank(s)	T4	N2	M1	Blank(s)	Blank(s)	Blank(s)	D	D	Distant	Blank(s)	Blank(s)	0	None	None; diagnosed at autopsy	No radiation and/or cancer-directed surgery	Not recommended	None	Blank(s)	Blank(s)	Blank(s)	Blank(s)	Blank(s)	190	700	200	40	988	Blank(s)	Blank(s)
662	59	1948	2008	Female	White	C34.1-Upper lobe, lung	8013/3: Large cell neuroendocrine carcinoma	Unknown	8.3 Carcinoma of trachea,bronchus, and lung	Unclassified	XI(f) Other and unspecified carcinomas	Right - origin of primary	Positive histology	Blank(s)	IV	Blank(s)	Blank(s)	Blank(s)	Blank(s)	Blank(s)	T4	N2	M1	Blank(s)	Blank(s)	Blank(s)	D	D	Distant	Blank(s)	Blank(s)	0	None	Non-primary surgical procedure to distant site	Radiation after surgery	Not recommended	Beam radiation	Blank(s)	Blank(s)	Blank(s)	Blank(s)	Blank(s)	50	720	200	40	988	Blank(s)	Blank(s)
663	84	1924	2008	Male	White	C34.1-Upper lobe, lung	8013/3: Large cell neuroendocrine carcinoma	Unknown	8.3 Carcinoma of trachea,bronchus, and lung	Unclassified	XI(f) Other and unspecified carcinomas	Right - origin of primary	Positive exfoliative cytology, no positive histology	Blank(s)	IIIB	Blank(s)	Blank(s)	Blank(s)	Blank(s)	Blank(s)	T4	N0	M0	Blank(s)	Blank(s)	Blank(s)	D	D	Distant	Blank(s)	Blank(s)	0	None	None; diagnosed at autopsy	No radiation and/or cancer-directed surgery	Not recommended	None	Blank(s)	Blank(s)	Blank(s)	Blank(s)	Blank(s)	31	720	0	0	988	Blank(s)	Blank(s)
664	69	1939	2008	Male	White	C34.0-Main bronchus	8013/3: Large cell neuroendocrine carcinoma	Unknown	8.3 Carcinoma of trachea,bronchus, and lung	Unclassified	XI(f) Other and unspecified carcinomas	Left - origin of primary	Positive histology	Blank(s)	IIIA	Blank(s)	Blank(s)	Blank(s)	Blank(s)	Blank(s)	TX	N2	M0	Blank(s)	Blank(s)	Blank(s)	RN	RN	Regional	Blank(s)	Blank(s)	0	Biopsy or aspiration of regional lymph node, NOS	None; diagnosed at autopsy	No radiation and/or cancer-directed surgery	Not recommended	None	Blank(s)	Blank(s)	Blank(s)	Blank(s)	Blank(s)	999	999	200	0	988	Blank(s)	Blank(s)
665	76	1936	2012	Female	White	C34.0-Main bronchus	8013/3: Large cell neuroendocrine carcinoma	Unknown	8.3 Carcinoma of trachea,bronchus, and lung	Unclassified	XI(f) Other and unspecified carcinomas	Right - origin of primary	Positive histology	IIB	IIIB	Blank(s)	Blank(s)	T3	N0	M0	T4	N0	M0	Blank(s)	Blank(s)	Blank(s)	L	RE	Regional	Blank(s)	Blank(s)	0	None	None; diagnosed at autopsy	No radiation and/or cancer-directed surgery	Not recommended	Beam radiation	Blank(s)	Blank(s)	Blank(s)	Blank(s)	Blank(s)	120	300	0	0	40	998	Blank(s)
666	74	1938	2013	Female	White	C34.1-Upper lobe, lung	8013/3: Large cell neuroendocrine carcinoma	Unknown	8.3 Carcinoma of trachea,bronchus, and lung	Unclassified	XI(f) Other and unspecified carcinomas	Right - origin of primary	Positive histology	IA	IA	Blank(s)	Blank(s)	T1a	N0	M0	T1	N0	M0	Blank(s)	Blank(s)	Blank(s)	L	L	Localized	Blank(s)	Blank(s)	0	None	None; diagnosed at autopsy	No radiation and/or cancer-directed surgery	Not recommended	Beam radiation	Blank(s)	Blank(s)	Blank(s)	Blank(s)	Blank(s)	20	100	0	0	0	998	Blank(s)
667	70	1938	2008	Female	White	C34.1-Upper lobe, lung	8013/3: Large cell neuroendocrine carcinoma	Poorly differentiated; Grade III	8.3 Carcinoma of trachea,bronchus, and lung	Unclassified	XI(f) Other and unspecified carcinomas	Left - origin of primary	Positive histology	Blank(s)	IV	Blank(s)	Blank(s)	Blank(s)	Blank(s)	Blank(s)	T1	N0	M1	Blank(s)	Blank(s)	Blank(s)	D	D	Distant	Blank(s)	Blank(s)	0	None	None; diagnosed at autopsy	No radiation and/or cancer-directed surgery	Not recommended, contraindicated due to other cond; autopsy only (1973-2002)	None	Blank(s)	Blank(s)	Blank(s)	Blank(s)	Blank(s)	20	300	0	40	988	Blank(s)	Blank(s)
668	69	1939	2008	Male	White	C34.3-Lower lobe, lung	8013/3: Large cell neuroendocrine carcinoma	Unknown	8.3 Carcinoma of trachea,bronchus, and lung	Unclassified	XI(f) Other and unspecified carcinomas	Right - origin of primary	Positive microscopic confirm, method not specified	Blank(s)	IIIB	Blank(s)	Blank(s)	Blank(s)	Blank(s)	Blank(s)	T4	N0	M0	Blank(s)	Blank(s)	Blank(s)	L	RE	Regional	Blank(s)	Blank(s)	0	None	None; diagnosed at autopsy	No radiation and/or cancer-directed surgery	Not recommended	Beam radiation	Blank(s)	Blank(s)	Blank(s)	Blank(s)	Blank(s)	9	650	0	0	988	Blank(s)	Blank(s)
669	67	1941	2008	Male	Black	C34.1-Upper lobe, lung	8013/3: Large cell neuroendocrine carcinoma	Unknown	8.3 Carcinoma of trachea,bronchus, and lung	Unclassified	XI(f) Other and unspecified carcinomas	Right - origin of primary	Positive histology	Blank(s)	IV	Blank(s)	Blank(s)	Blank(s)	Blank(s)	Blank(s)	T4	N2	M1	Blank(s)	Blank(s)	Blank(s)	D	D	Distant	Blank(s)	Blank(s)	0	Biopsy or aspiration of regional lymph node, NOS	None; diagnosed at autopsy	Radiation after surgery	Not recommended	Beam radiation	Blank(s)	Blank(s)	Blank(s)	Blank(s)	Blank(s)	90	650	200	40	988	Blank(s)	Blank(s)
670	39	1969	2008	Female	White	C34.3-Lower lobe, lung	8013/3: Large cell neuroendocrine carcinoma	Unknown	8.3 Carcinoma of trachea,bronchus, and lung	Unclassified	XI(f) Other and unspecified carcinomas	Left - origin of primary	Positive histology	Blank(s)	IV	Blank(s)	Blank(s)	Blank(s)	Blank(s)	Blank(s)	T2	N2	M1	Blank(s)	Blank(s)	Blank(s)	D	D	Distant	Blank(s)	Blank(s)	0	None	None; diagnosed at autopsy	No radiation and/or cancer-directed surgery	Not recommended	Beam radiation	Blank(s)	Blank(s)	Blank(s)	Blank(s)	Blank(s)	56	400	200	40	988	Blank(s)	Blank(s)
671	48	1960	2009	Male	White	C34.1-Upper lobe, lung	8013/3: Large cell neuroendocrine carcinoma	Unknown	8.3 Carcinoma of trachea,bronchus, and lung	Unclassified	XI(f) Other and unspecified carcinomas	Right - origin of primary	Positive histology	Blank(s)	IA	Blank(s)	Blank(s)	Blank(s)	Blank(s)	Blank(s)	T1	N0	M0	Blank(s)	Blank(s)	Blank(s)	L	L	Localized	Blank(s)	Blank(s)	33	4 or more regional lymph nodes removed	None; diagnosed at autopsy	No radiation and/or cancer-directed surgery	Surgery performed	None	Blank(s)	Blank(s)	Blank(s)	Blank(s)	Blank(s)	23	100	0	0	988	Blank(s)	Blank(s)
[truncated: 2,863 more rows]
[truncated: 35 more columns]

## Sheet: 筛pri和生存
number	nubmer2	Age at diagnosis	k-age	Year of diagnosis	Sex	k-sex	Race recode (White, Black, Other)	k-race	Primary Site - labeled	k-primary site	ICD-O-3 Hist/behav	Grade	k-Grade	Laterality偏侧化	Derived AJCC Stage Group, 7th ed (2010+)	Derived AJCC Stage Group, 6th ed (2004+)	AJCC stage 3rd edition (1988-2003)	SEER modified AJCC stage 3rd (1988-2003)	Derived AJCC T, 7th ed (2010+)	Derived AJCC N, 7th ed (2010+)	Derived AJCC M, 7th ed (2010+)	Derived AJCC T, 6th ed (2004+)	Derived AJCC N, 6th ed (2004+)	Derived AJCC M, 6th ed (2004+)	T value - based on AJCC 3rd (1988-2003)	N value - based on AJCC 3rd (1988-2003)	M value - based on AJCC 3rd (1988-2003)	Derived SS1977 (2004+)	Derived SS2000 (2004+)	Summary stage 2000 (1998+)	k-Summary stage	SEER summary stage 2000 (2001-2003)	SEER summary stage 1977 (1995-2000)	RX Summ--Surg Prim Site (1998+)	K-surgury	K-kind of surgury	RX Summ--Scope Reg LN Sur (2003+)	RX Summ--Surg Oth Reg/Dis (2003+)	Radiation sequence with surgery	Reason no cancer-directed surgery	Radiation	Scope of reg lymph nd surg (1998-2002)	RX Summ--Reg LN Examined (1998-2002)	Surgery of oth reg/dis sites (1998-2002)	Radiation to Brain or CNS (1988-1997)	CS tumor size (2004+)	CS extension (2004+)	CS lymph nodes (2004+)	CS mets at dx (2004+)
[truncated: 2,556 more rows]
[truncated: 26 more columns]
